# Supplementary material
Source: Frontiers journal article supplement (https://www.frontiersin.org/articles/31964)
Supplement: Data_Sheet_3.XLSX [file Data_Sheet_3.XLSX]

## Sheet: common TDs in Br,At,Tp
A.thalina tandem arrays	T.parvula tandem arrays	B.rapa LF tandem arrays	B.rapa MF1 tandem arrays	B.rapa MF2 tandem arrays
AT4G30110,AT4G30120	c0014_00213,c0014_00214	Bra011165,Bra011164	-	-
AT1G27170,AT1G27180	c0001_01914,c0001_01915,c0001_01916	Bra024652,Bra024651	-	Bra016312,Bra016313,Bra016314
AT1G08135,AT1G08140,AT1G08150	c0001_00580,c0001_00581,c0001_00582	Bra018651,Bra018650	Bra031614,Bra031613	-
AT5G63580,AT5G63590,AT5G63595,AT5G63600	c0003_00386,c0003_00387,c0003_00388	Bra038647,Bra038648	-	Bra029212,Bra029211
AT5G26650,AT5G26630	c0003_00885,c0003_00886	Bra009911,Bra009913	-	Bra020552,Bra020550;Bra020525,Bra020524
AT5G24140,AT5G24150,AT5G24155,AT5G24160	c0003_00706,c0003_00707	Bra009737,Bra009738	-	Bra029393,Bra029392,Bra029391
AT5G45530,AT5G45540	c0003_01859,c0003_01860	Bra025072,Bra025073	-	-
AT5G63980,AT5G63990,AT5G64000	c0003_00350,c0003_00351,c0003_00352	Bra024255,Bra024256,Bra024257	-	-
AT4G00210,AT4G00220		c0011_00025,c0011_00026
AT3G13080,AT3G13090,AT3G13100	c0005_01104,c0005_01105,c0005_01106	-	Bra039368,Bra039369	Bra001488,Bra001490
AT4G21366,AT4G21380,AT4G21390,AT4G21400,AT4G21410	c0006_01052,c0006_01053,c0006_01055,c0006_01056	Bra013522,Bra013523,Bra013524	-	-
AT4G18190,AT4G18195,AT4G18197,AT4G18205,AT4G18210,AT4G18220	c0006_00702,c0006_00704,c0006_00705	Bra013290,Bra013291,Bra013292	-	-
AT2G29290,AT2G29300,AT2G29310,AT2G29320,AT2G29330,AT2G29340,AT2G29350,AT2G29360,AT2G29370	c0004_01754,c0004_01755,c0004_01756,c0004_01757,c0004_01759,c0004_01760,c0004_01761	Bra018391,Bra018393;Bra018399,Bra018400,Bra018401,Bra018402,Bra018404,Bra018405	Bra039976,Bra039977	-
AT1G14100,AT1G14110	c0001_01082,c0001_01083,c0001_01084,c0001_01085	Bra019681,Bra019680,Bra019679	-	Bra016709,Bra016710,Bra016711,Bra016712
AT1G22340,AT1G22360,AT1G22370,AT1G22380,AT1G22400	c0001_01743,c0001_01744,c0001_01745,c0001_01746,c0001_01748	Bra031388,Bra031387,Bra031386	Bra012324,Bra012323,Bra012322	-
AT2G30860,AT2G30870	c0004_01634,c0004_01636	-	-	Bra022815,Bra022816
AT1G71390,AT1G71400	c0012_00459,c0012_00460	Bra016142,Bra016141	-	Bra003925,Bra003927
AT1G53990,AT1G54000,AT1G54010,AT1G54020,AT1G54030	c0008_00141,c0008_00142,c0008_00143,c0008_00144	Bra037957,Bra037955,Bra037954	Bra030911,Bra030912,Bra030913,Bra030915,Bra030916,Bra030917,Bra030918	Bra014375,Bra014374,Bra014372,Bra014371
AT4G35690,AT4G35710	c0017_00423,c0017_00425	Bra011632,Bra011630	-	-
AT3G04060,AT3G04070	c0005_00290,c0005_00291	Bra040152,Bra040153	-	-
AT4G29570,AT4G29580,AT4G29600,AT4G29610,AT4G29620,AT4G29630,AT4G29640,AT4G29650	c0014_00162,c0014_00163	-	Bra024141,Bra024140	-
AT5G65050,AT5G65060,AT5G65070,AT5G65080	c0003_00248,c0003_00250	Bra024350,Bra024351	-	Bra031888,Bra031886
AT1G75030,AT1G75040,AT1G75050	c0013_00160,c0013_00161,c0013_00162	Bra015874,Bra015873,Bra015871,Bra015870	-	-
AT3G51420,AT3G51430,AT3G51440,AT3G51450		c0007_00551,c0007_00552
AT3G58740,AT3G58750	c0007_01141,c0007_01142,c0007_01143	Bra007416,Bra007417	-	-
AT5G51860,AT5G51870	c0002_00137,c0002_00138,c0002_00139	-	-	Bra029154,Bra029155
AT3G18070,AT3G18080	c0005_01596,c0005_01597	-	Bra021292,Bra021291	-
AT5G41540,AT5G41550	c0016_00050,c0016_00051	Bra025494,Bra025493	Bra028499,Bra028500	-
AT2G32390,AT2G32400	c0004_01491,c0004_01492	Bra005589,Bra005591	Bra021780,Bra021781,Bra021782,Bra021783,Bra021784,Bra021785,Bra021786	-
AT2G44450,AT2G44460,AT2G44470,AT2G44480,AT2G44490	c0004_00351,c0004_00352,c0004_00353	Bra004833,Bra004835,Bra004836,Bra004837,Bra004838,Bra004839,Bra004840	Bra037648,Bra037647	-
AT1G26380,AT1G26390,AT1G26400,AT1G26410,AT1G26420	c0001_01980,c0001_01981	Bra024719,Bra024717	-	-
AT5G21100,AT5G21105	c0002_00995,c0002_00996	Bra002357,Bra002356,Bra002355	-	-
AT3G13650,AT3G13660,AT3G13662	c0005_01164,c0005_01165	-	Bra021497,Bra021496,Bra021495	-
AT5G66890,AT5G66900,AT5G66910	c0003_00093,c0003_00094,c0003_00095	Bra012116,Bra012114	-	-
AT4G02733,AT4G02740,AT4G02760	c0011_00256,c0011_00257	-	Bra000865,Bra000866	-
AT2G45550,AT2G45560,AT2G45570,AT2G45580	c0004_00242,c0004_00243,c0004_00244,c0004_00245	-	Bra039330,Bra039329,Bra039328,Bra039327	-
AT3G28780,AT3G28790,AT3G28810,AT3G28820,AT3G28830,AT3G28840	c0003_01222,c0003_01223,c0003_01224,c0003_01225	Bra025356,Bra025355,Bra025354	-	-
AT5G45950,AT5G45960	c0003_01820,c0003_01821	-	Bra022002,Bra022003	-
AT5G67150,AT5G67160	c0003_00116,c0003_00117,c0003_00118,c0003_00119	Bra012138,Bra012137	-	-
AT3G47730,AT3G47740,AT3G47750,AT3G47760,AT3G47770,AT3G47780,AT3G47790	c0007_00243,c0007_00244,c0007_00245	Bra018113,Bra018114,Bra018115,Bra018116	-	Bra033786,Bra033785
AT4G34640,AT4G34650	c0014_00665,c0014_00666	Bra011549,Bra011548	Bra017667,Bra017668	-
AT5G08670,AT5G08680,AT5G08690	c0002_01968,c0002_01969,c0002_01970	-	Bra006013,Bra006014	Bra028649,Bra028648
AT3G07820,AT3G07830,AT3G07840,AT3G07850	c0005_00653,c0005_00654,c0005_00655	Bra029683,Bra029682	Bra040035,Bra040036,Bra040034,Bra040032	Bra001268,Bra001269,Bra001270
AT1G74000,AT1G74010,AT1G74020	c0013_00064,c0013_00065,c0013_00066,c0013_00067	Bra015944,Bra015943	Bra008125,Bra008124,Bra008126,Bra008127	-
AT2G24696,AT2G24700	c0009_00401,c0009_00402	Bra007835,Bra007836	Bra032079,Bra032078,Bra032077,Bra032076,Bra032075	-
AT1G03220,AT1G03230	c0070_00021,c0070_00022	-	-	Bra030526,Bra030525
AT1G77520,AT1G77530	c0013_00412,c0013_00413	-	-	Bra003680,Bra003681,Bra003682
AT4G19680,AT4G19690	c0006_00930,c0006_00931,c0006_00932	Bra013418,Bra013419,Bra013420,Bra013421,Bra013422	Bra012535,Bra012534,Bra012533	-
AT3G10710,AT3G10720	c0005_00877,c0005_00878	-	Bra034140,Bra034139	-
AT2G38380,AT2G38390	c0004_00915,c0004_00916	-	Bra017121,Bra017120	Bra000058,Bra000059
AT5G60770,AT5G60780	c0002_00897,c0002_00898	Bra002453,Bra002451	-	-
AT2G41800,AT2G41810	c0004_00585,c0004_00586	Bra004650,Bra004651	-	-
AT3G28930,AT3G28940,AT3G28950	c0003_01211,c0003_01212	Bra025368,Bra025367,Bra025366,Bra025365	-	-
AT2G02070,AT2G02080	c0003_01582,c0003_01583	Bra024833,Bra024834	-	-
AT4G23220,AT4G23230,AT4G23240,AT4G23250,AT4G23260,AT4G23270,AT4G23280,AT4G23290,AT4G23300,AT4G23310,AT4G23320	c0006_01210,c0006_01211,c0006_01212,c0006_01213,c0006_01214,c0006_01215,c0006_01216,c0006_01217,c0006_01218	Bra013676,Bra013677,Bra013678,Bra013679,Bra013681,Bra013682,Bra013683,Bra013684	Bra019326,Bra019324,Bra019323,Bra019322,Bra019321,Bra019320,Bra019319;Bra019317,Bra019316,Bra019315,Bra019314,Bra019313	Bra020821,Bra020820
AT5G53780,AT5G53790	c0002_00300,c0002_00301	-	Bra022671,Bra022669	-
AT5G19100,AT5G19110,AT5G19120	c0002_01159,c0002_01160,c0002_01161,c0002_01162	Bra002214,Bra002212,Bra002211,Bra002210	-	Bra023703,Bra023704,Bra023705
AT5G07850,AT5G07860,AT5G07870	c0002_02045,c0002_02046	-	-	Bra028682,Bra028681
AT4G34920,AT4G34930	c0014_00689,c0014_00690	-	-	Bra034664,Bra034663
AT4G39550,AT4G39560,AT4G39570,AT4G39580,AT4G39590,AT4G39600	c0017_00134,c0017_00135,c0017_00137	Bra011856,Bra011854,Bra011853,Bra011852,Bra011851	Bra033628,Bra033627	-
AT4G05110,AT4G05120,AT4G05130		c0011_00353,c0011_00354,c0011_00355,c0011_00356
AT4G11460,AT4G11470,AT4G11480,AT4G11490	c0011_00552,c0011_00553	-	Bra000744,Bra000745,Bra000746	-
AT5G06720,AT5G06730		c0002_02142,c0002_02143
AT1G60450,AT1G60470	c0015_00258,c0015_00259	Bra027156,Bra027157	Bra031509,Bra031510	-
AT5G51490,AT5G51500		c0002_00095,c0002_00096
AT4G37310,AT4G37320,AT4G37330,AT4G37340,AT4G37360,AT4G37370	c0017_00266,c0017_00267,c0017_00268,c0017_00269,c0017_00270,c0017_00271	-	Bra017817,Bra017818,Bra017819	Bra010596,Bra010597,Bra010598
AT5G13430,AT5G13440	c0002_01635,c0002_01636	-	Bra006198,Bra006199	Bra023411,Bra023412
AT4G23590,AT4G23600	c0006_01242,c0006_01243	-	Bra019294,Bra019293,Bra019291	-
AT3G57240,AT3G57260,AT3G57270	c0007_01022,c0007_01023,c0007_01024	Bra007313,Bra007314,Bra007315	Bra014635,Bra014636,Bra014637,Bra014638,Bra014640	-
AT5G10220,AT5G10230	c0117_00001,c0117_00002	Bra009048,Bra009049	-	-
AT5G52750,AT5G52760,AT5G52770	c0002_00209,c0002_00210,c0002_00212,c0002_00213	Bra003115,Bra003114	Bra022609,Bra022607,Bra022606,Bra022605	-
AT5G60270,AT5G60280	c0002_00854,c0002_00855,c0002_00857	Bra002500,Bra002499,Bra002498,Bra002497,Bra002496,Bra002494,Bra002493,Bra002492,Bra002491,Bra002490	-	-
AT4G29680,AT4G29690,AT4G29700,AT4G29710	c0014_00166,c0014_00167	Bra011130,Bra011129,Bra011128	-	Bra010320,Bra010321
AT1G14370,AT1G14390	c0001_01112,c0001_01114	Bra019656,Bra019654	-	-
AT4G12300,AT4G12310,AT4G12320,AT4G12330	c0011_00491,c0011_00492,c0011_00493	-	Bra000768,Bra000769	-
AT4G17490,AT4G17500	c0006_00776,c0006_00777	Bra040158,Bra040159	-	Bra021049,Bra021048,Bra021047
AT5G58820,AT5G58830,AT5G58840	c0002_00725,c0002_00726	-	Bra020347,Bra020348,Bra020349,Bra020350,Bra020351	-
AT5G58670,AT5G58690,AT5G58700	c0002_00713,c0002_00714,c0002_00715	Bra002627,Bra002626,Bra002625	Bra020359,Bra020361	-
AT2G44370,AT2G44380,AT2G44390	c0004_00358,c0004_00359,c0004_00361,c0004_00362	Bra004826,Bra004828	Bra037655,Bra037654,Bra037653,Bra037652	-
AT3G05610,AT3G05620	c0005_00433,c0005_00434	Bra039419,Bra039420,Bra039421	-	-
AT1G63860,AT1G63870,AT1G63880	c0026_00079,c0026_00081,c0026_00082,c0026_00083	-	Bra027780,Bra027779,Bra027778,Bra027777,Bra027775,Bra027774	-
AT3G13390,AT3G13400	c0005_01137,c0005_01138	Bra034679,Bra034680	Bra039388,Bra039389	Bra001503,Bra001504
AT1G80330,AT1G80340	c0013_00689,c0013_00690	-	Bra008480,Bra008481	-
AT4G25780,AT4G25790	c0006_01458,c0006_01459	Bra013919,Bra013920	-	-
AT1G07240,AT1G07250,AT1G07260	c0001_00520,c0001_00521,c0001_00522	Bra015568,Bra015567	-	-
AT3G46070,AT3G46080,AT3G46090		c0007_00111,c0007_00112
AT2G32020,AT2G32030	c0004_01523,c0004_01524,c0004_01525	-	Bra021770,Bra021771	-
AT5G61180,AT5G61190	c0003_00590,c0003_00591	-	-	Bra029330,Bra029329
AT5G45240,AT5G45250,AT5G45260		c0003_01884,c0003_01885
AT5G01810,AT5G01820	c0002_02583,c0002_02584	-	-	Bra028912,Bra028911
AT4G28410,AT4G28420	c0014_00056,c0014_00057	Bra011026,Bra011025	-	-
AT3G02580,AT3G02590	c0005_00158,c0005_00159	-	-	Bra001053,Bra001054,Bra001055
AT4G20910,AT4G20920	c0006_01003,c0006_01004	Bra013482,Bra013483,Bra013484	-	-
AT5G39720,AT5G39730	c0016_00220,c0016_00221	Bra025649,Bra025647	-	-
AT2G39518,AT2G39530	c0004_00806,c0004_00807	-	Bra017067,Bra017066,Bra017065	-
AT5G01540,AT5G01550,AT5G01560	c0002_02563,c0002_02564	-	Bra005680,Bra005681	-
AT1G01580,AT1G01590	c0001_00061,c0001_00062	-	Bra032640,Bra032641	-
AT5G07410,AT5G07420,AT5G07430	c0002_02079,c0002_02080,c0002_02081	-	-	Bra028699,Bra028698
AT1G23880,AT1G23890	c0001_01878,c0001_01879	Bra024626,Bra024625	-	-
AT1G16930,AT1G16940	c0001_01313,c0001_01314	Bra026015,Bra026014	-	-
AT5G07460,AT5G07470	c0002_02075,c0002_02076	-	Bra005936,Bra005937,Bra005938,Bra005939,Bra005940	-
AT2G19760,AT2G19770	c0020_00109,c0020_00110	Bra039019,Bra039018	-	Bra036707,Bra036705
AT1G26590,AT1G26610	c0001_01969,c0001_01970	Bra024706,Bra024704	Bra012452,Bra012450	Bra016278,Bra016280
AT5G59310,AT5G59320,AT5G59330	c0002_00769,c0002_00771	-	Bra020322,Bra020323	-
AT3G22310,AT3G22330	c0149_00011,c0149_00013	-	Bra023836,Bra023837	-
AT5G23010,AT5G23020	c0003_00624,c0003_00625	Bra013011,Bra013009	-	Bra029356,Bra029355
AT5G15890,AT5G15900	c0002_01425,c0002_01426	Bra008663,Bra008664,Bra008666	-	-
AT4G21030,AT4G21040,AT4G21050	c0006_01012,c0006_01013,c0006_01015,c0006_01016,c0006_01017	Bra013490,Bra013492,Bra013493,Bra013494	Bra038790,Bra038789	Bra020881,Bra020880
AT5G40230,AT5G40240	c0016_00167,c0016_00168,c0016_00169,c0016_00170	Bra025599,Bra025598	Bra028450,Bra028451,Bra028452	Bra030338,Bra030337,Bra030336
AT1G01660,AT1G01670,AT1G01680	c0001_00052,c0001_00053,c0001_00054	Bra033244,Bra033243,Bra033242	-	-
AT5G61590,AT5G61600	c0003_00554,c0003_00555	Bra012939,Bra012938	-	-
AT3G17410,AT3G17420	c0044_00037,c0044_00038	Bra022214,Bra022213	Bra021253,Bra021250,Bra021251;Bra021244,Bra021242	-
AT4G15215,AT4G15230,AT4G15233,AT4G15236	c0006_00467,c0006_00469	-	Bra012798,Bra012797	-
AT2G44540,AT2G44550,AT2G44560,AT2G44570	c0004_00339,c0004_00340	Bra004844,Bra004845,Bra004846	-	-
AT4G19840,AT4G19850	c0006_00938,c0006_00939	Bra013428,Bra013429	-	-
AT1G61360,AT1G61370,AT1G61380,AT1G61390,AT1G61400	c0015_00381,c0015_00382,c0015_00383,c0015_00384,c0015_00385,c0015_00386,c0015_00387,c0015_00388	-	Bra031434,Bra031433	-
AT4G37550,AT4G37560	c0017_00244,c0017_00245	Bra011774,Bra011773	-	-
AT3G17690,AT3G17700	c0005_01560,c0005_01561	Bra022235,Bra022233,Bra022232	Bra021266,Bra021265	Bra001676,Bra001678
AT2G42530,AT2G42540	c0004_00525,c0004_00526	-	-	Bra000263,Bra000265
AT3G50120,AT3G50130,AT3G50140,AT3G50150,AT3G50160,AT3G50170,AT3G50180,AT3G50190,AT3G50200	c0007_00441,c0007_00442,c0007_00443	Bra036056,Bra036057	Bra012907,Bra012906,Bra012905,Bra012904	-
AT3G61270,AT3G61280,AT3G61290	c0007_01322,c0007_01323	Bra007590,Bra007591,Bra007592,Bra007593	-	-
AT1G10060,AT1G10070	c0001_00747,c0001_00749	Bra019964,Bra019963	-	Bra018463,Bra018464
AT2G30140,AT2G30150	c0004_01692,c0004_01693,c0004_01694	Bra018333,Bra018334	-	-
AT1G21210,AT1G21230,AT1G21240,AT1G21245,AT1G21250	c0001_01648,c0001_01649	-	-	Bra016426,Bra016427,Bra016428
AT2G43820,AT2G43840	c0004_00410,c0004_00411	Bra004787,Bra004788	-	Bra000329,Bra000330
AT2G34990,AT2G35000	c0004_01249,c0004_01250	Bra005374,Bra005375	-	-
AT1G77950,AT1G77980	c0013_00454,c0013_00456	Bra015645,Bra015643	-	-
AT4G38825,AT4G38840,AT4G38850	c0017_00065,c0017_00066	Bra011891,Bra011892	-	-
AT1G68380,AT1G68390	c0012_00153,c0012_00154	Bra004302,Bra004303	-	-
AT4G25810,AT4G25820	c0006_01460,c0006_01461	Bra013922,Bra013923	-	-
AT2G43510,AT2G43520,AT2G43530	c0004_00435,c0004_00436	Bra004768,Bra004769,Bra004770	-	-
AT4G33590,AT4G33600	c0014_00554,c0014_00555	-	-	Bra034575,Bra034574
AT5G39520,AT5G39530	c0016_00235,c0016_00236	Bra025665,Bra025664	-	-
AT1G76770,AT1G76780	c0013_00336,c0013_00338	-	Bra008274,Bra008276	-
AT4G29260,AT4G29270	c0014_00138,c0014_00139	-	-	Bra010332,Bra010333
AT3G17225,AT3G17230	c0044_00020,c0044_00023,c0044_00024	Bra022203,Bra022202	-	-
AT5G57530,AT5G57540,AT5G57550,AT5G57560	c0002_00613,c0002_00614,c0002_00615,c0002_00616,c0002_00617	Bra002723,Bra002722,Bra002720,Bra002719,Bra002718	Bra020432,Bra020433,Bra020434,Bra020436	-
AT5G60520,AT5G60530	c0002_00872,c0002_00873	Bra002475,Bra002474	-	-
AT2G38750,AT2G38760	c0004_00872,c0004_00873,c0004_00874,c0004_00875	-	Bra017103,Bra017102	Bra000090,Bra000091
AT1G28220,AT1G28230	c0001_02170,c0001_02171,c0001_02172	-	-	Bra010890,Bra010891
AT3G53280,AT3G53290,AT3G53300,AT3G53305	c0007_00704,c0007_00705,c0007_00706	Bra006987,Bra006988	-	-
AT1G11330,AT1G11340,AT1G11350	c0001_00861,c0001_00862	Bra019867,Bra019866,Bra019864,Bra019863,Bra019862	Bra031766,Bra031765,Bra031764	-
AT5G50690,AT5G50700	c0002_00014,c0002_00015	-	Bra022525,Bra022523	-
AT5G23350,AT5G23360,AT5G23370	c0003_00650,c0003_00651	Bra009672,Bra009674,Bra009675	-	Bra029370,Bra029369,Bra029368
AT1G49200,AT1G49210,AT1G49220,AT1G49230	c0008_00553,c0008_00554,c0008_00555	Bra018781,Bra018780,Bra018779,Bra018777	Bra014177,Bra014175,Bra014174	-
AT2G34350,AT2G34355	c0061_00014,c0061_00015	-	Bra021904,Bra021905	-
AT4G30270,AT4G30280,AT4G30290	c0014_00233,c0014_00234,c0014_00235	Bra011181,Bra011180,Bra011179	Bra024089,Bra024088,Bra024087	Bra010290,Bra010291,Bra010292
AT4G30650,AT4G30660	c0014_00275,c0014_00276	Bra011209,Bra011208	-	-
AT4G39480,AT4G39490,AT4G39500,AT4G39510	c0017_00126,c0017_00127,c0017_00128,c0017_00129,c0017_00130	-	Bra033626,Bra033625,Bra033624,Bra033623,Bra033622,Bra033621	Bra010675,Bra010676,Bra010678,Bra010679,Bra010680
AT1G08890,AT1G08900,AT1G08920,AT1G08930	c0001_00649,c0001_00650	Bra018594,Bra018592,Bra018591	Bra031649,Bra031648	Bra030748,Bra030747
AT1G67980,AT1G67990	c0012_00109,c0012_00110,c0012_00111	-	Bra033968,Bra033967	-
AT1G29770,AT1G29780	c0001_02287,c0001_02288	-	Bra030172,Bra030171	Bra010812,Bra010813
AT4G25400,AT4G25410	c0006_01421,c0006_01422	-	Bra019167,Bra019166	-
AT3G14415,AT3G14420	c0005_01252,c0005_01253	Bra027338,Bra027339	Bra021556,Bra021555	Bra001550,Bra001551
AT4G30530,AT4G30540,AT4G30550	c0014_00260,c0014_00261	-	-	Bra010282,Bra010283
AT5G61550,AT5G61560	c0003_00559,c0003_00560	Bra012944,Bra012943	-	-
AT3G48270,AT3G48280,AT3G48290,AT3G48300,AT3G48310,AT3G48320	c0007_00284,c0007_00286	-	-	Bra029897,Bra029898
AT5G59880,AT5G59890	c0002_00826,c0002_00827	-	Bra020276,Bra020277	Bra006686,Bra006687
AT3G45390,AT3G45410,AT3G45420,AT3G45430,AT3G45440	c0007_00070,c0007_00072,c0007_00073,c0007_00074,c0007_00075,c0007_00076	Bra038286,Bra038287,Bra038289	-	-
AT4G01430,AT4G01440,AT4G01450	c0011_00129,c0011_00130,c0011_00131,c0011_00132	-	Bra000923,Bra000925,Bra000926	Bra008545,Bra008546,Bra008548
AT1G55560,AT1G55570	c0008_00071,c0008_00072	-	Bra030849,Bra030850	-
AT4G19570,AT4G19580,AT4G19590	c0006_00920,c0006_00921	Bra013403,Bra013404	-	Bra020958,Bra020957,Bra020956,Bra020955
AT1G72120,AT1G72125,AT1G72130,AT1G72140	c0012_00523,c0012_00524,c0012_00525	-	-	Bra003893,Bra003894,Bra003895,Bra003896,Bra003897,Bra003898
AT4G15740,AT4G15755	c0006_00524,c0006_00525,c0006_00526,c0006_00527,c0006_00528,c0006_00530,c0006_00531,c0006_00532	Bra033508,Bra033507,Bra033506	Bra012771,Bra012770	Bra038073,Bra038072
AT3G01230,AT3G01240	c0005_00086,c0005_00087	Bra039134,Bra039133	-	-
AT1G53830,AT1G53840	c0008_00153,c0008_00154	-	-	Bra040562,Bra040563
AT3G26150,AT3G26160,AT3G26170,AT3G26180,AT3G26190,AT3G26200,AT3G26210,AT3G26220,AT3G26230	c0003_01399,c0003_01400,c0003_01401,c0003_01402,c0003_01403,c0003_01404,c0003_01405,c0003_01406,c0003_01407,c0003_01408,c0003_01409,c0003_01410	Bra025194,Bra025193,Bra025192,Bra025191,Bra025190,Bra025189,Bra025188	-	-
AT4G25250,AT4G25260	c0006_01408,c0006_01409	Bra013878,Bra013879,Bra013880	Bra019180,Bra019179	-
AT5G19880,AT5G19890	c0002_01092,c0002_01093	Bra002271,Bra002270,Bra002269	-	Bra020071,Bra020072
AT3G14300,AT3G14310	c0005_01240,c0005_01241	-	Bra021549,Bra021548,Bra021547	Bra001546,Bra001547
AT5G21222,AT5G21326	c0002_00986,c0002_00988	Bra002369,Bra002367	-	-
AT4G25515,AT4G25520	c0006_01432,c0006_01433	-	Bra019159,Bra019158	-
AT2G43570,AT2G43580,AT2G43590,AT2G43600,AT2G43610,AT2G43620	c0004_00426,c0004_00427,c0004_00428,c0004_00429	Bra004771,Bra004772,Bra004773	Bra037699,Bra037698	Bra000310,Bra000311,Bra000312,Bra000313,Bra000314,Bra000315
AT1G05240,AT1G05250,AT1G05260	c0001_00358,c0001_00359,c0001_00360,c0001_00361	Bra015404,Bra015403,Bra015402	Bra032474,Bra032475,Bra032476,Bra032477	Bra030607,Bra030606
AT2G45930,AT2G45940	c0004_00203,c0004_00204	-	-	Bra000405,Bra000406
AT2G24250,AT2G24255	c0009_00446,c0009_00447	-	Bra032113,Bra032112;Bra032069,Bra032068,Bra032067,Bra032066,Bra032065,Bra032064	-
AT4G31610,AT4G31615,AT4G31620,AT4G31630,AT4G31640,AT4G31650,AT4G31660,AT4G31680,AT4G31690	c0014_00366,c0014_00368,c0014_00369	Bra011289,Bra011288,Bra011287,Bra011286,Bra011285	Bra023991,Bra023990,Bra023988	-
AT4G21903,AT4G21910	c0006_01102,c0006_01103,c0006_01104	-	Bra038749,Bra038748,Bra038747	Bra020863,Bra020862
AT5G59480,AT5G59490	c0002_00785,c0002_00786,c0002_00787	Bra002563,Bra002562	-	-
AT3G14210,AT3G14220,AT3G14225	c0005_01229,c0005_01230,c0005_01231	Bra027356,Bra027357,Bra027358,Bra027359	-	-
AT1G06080,AT1G06090,AT1G06100,AT1G06120	c0001_00425,c0001_00426	Bra015473,Bra015472	Bra032437,Bra032438,Bra032439	-
AT4G19410,AT4G19420	c0006_00908,c0006_00909	Bra013394,Bra013395	-	Bra020963,Bra020962
AT4G35200,AT4G35210	c0017_00472,c0017_00473,c0017_00474	-	-	Bra020805,Bra020804
AT5G08610,AT5G08620		c0002_01976,c0002_01977
AT3G04960,AT3G04980	c0005_00368,c0005_00370	Bra039474,Bra039476,Bra039477	-	-
AT5G43340,AT5G43350,AT5G43360,AT5G43370	c0003_02066,c0003_02067,c0003_02068	Bra033676,Bra033675,Bra033673	Bra035976,Bra035977,Bra035978,Bra035979,Bra035981	-
AT4G38990,AT4G39000,AT4G39010	c0017_00079,c0017_00080,c0017_00081	Bra011882,Bra011881	Bra033592,Bra033591	-
AT4G29340,AT4G29350	c0014_00142,c0014_00143	Bra011099,Bra011098	-	-
AT5G56370,AT5G56380,AT5G56390,AT5G56400,AT5G56410,AT5G56420,AT5G56430,AT5G56440,AT5G56452	c0002_00520,c0002_00521	Bra002819,Bra002817	-	Bra028923,Bra028925,Bra028926,Bra028927,Bra028928,Bra028929,Bra028930,Bra028931
AT1G69890,AT1G69900	c0012_00306,c0012_00307	Bra016256,Bra016255,Bra016254	Bra007887,Bra007888	-
AT3G51590,AT3G51600		c0007_00560,c0007_00561
AT1G52790,AT1G52800,AT1G52810,AT1G52820	c0131_00006,c0131_00007,c0131_00008	Bra018992,Bra018991,Bra018990,Bra018989	-	-
AT1G33080,AT1G33090,AT1G33100,AT1G33110	c0001_02557,c0001_02558,c0001_02559	Bra040000,Bra040001,Bra040003	-	-
AT3G26760,AT3G26770		c0003_01363,c0003_01364
AT5G24400,AT5G24410,AT5G24420	c0003_00726,c0003_00727	Bra009758,Bra009759,Bra009761;Bra009763,Bra009764	-	-
AT4G27290,AT4G27300	c0006_01593,c0006_01594	Bra026363,Bra026362	-	-
AT3G14460,AT3G14470	c0005_01258,c0005_01259	Bra027332,Bra027333	-	-
AT4G12470,AT4G12480,AT4G12490,AT4G12500,AT4G12510,AT4G12520,AT4G12530,AT4G12545,AT4G12550	c0011_00471,c0011_00472,c0011_00473,c0011_00474	-	Bra000775,Bra000777,Bra000778	Bra018481,Bra018483,Bra018484
AT2G34790,AT2G34810	c0004_01267,c0004_01268	Bra005390,Bra005392	-	-
AT3G06460,AT3G06470	c0005_00520,c0005_00521	-	Bra040273,Bra040272	-
AT1G20150,AT1G20160	c0001_01563,c0001_01564	Bra025796,Bra025798	Bra012217,Bra012215	-
AT2G40150,AT2G40160	c0004_00740,c0004_00741	-	-	Bra000171,Bra000172
AT1G12610,AT1G12630	c0001_00972,c0001_00974	-	-	Bra016761,Bra016763
AT4G20040,AT4G20050	c0006_00954,c0006_00955	Bra013441,Bra013442	-	-
AT5G07550,AT5G07560,AT5G07571	c0002_02066,c0002_02067,c0002_02068	-	-	Bra028692,Bra028691
AT2G41290,AT2G41300	c0004_00632,c0004_00633	Bra004613,Bra004614	-	Bra000222,Bra000223
AT3G14610,AT3G14620,AT3G14630,AT3G14640,AT3G14650,AT3G14660,AT3G14680,AT3G14690	c0005_01270,c0005_01271,c0005_01272,c0005_01273	Bra027319,Bra027320,Bra027321,Bra027322,Bra027323,Bra027324	Bra021572,Bra021570	Bra001560,Bra001561,Bra001562,Bra001563,Bra001564
AT2G17070,AT2G17080	c0010_00017,c0010_00018,c0010_00019,c0010_00020,c0010_00021	Bra002020,Bra002019	Bra013032,Bra013031	-
AT5G15840,AT5G15850	c0002_01430,c0002_01431	Bra008668,Bra008669	-	-
AT2G35770,AT2G35780	c0004_01174,c0004_01175	-	Bra017294,Bra017293	-
AT3G55090,AT3G55100,AT3G55110,AT3G55130	c0007_00856,c0007_00857,c0007_00858,c0007_00860	-	Bra014773,Bra014774,Bra014775,Bra014776	-
AT1G13470,AT1G13480,AT1G13490,AT1G13500,AT1G13510,AT1G13520,AT1G13530,AT1G13540,AT1G13550	c0001_01042,c0001_01043	-	Bra026900,Bra026901,Bra026902	Bra016727,Bra016728
AT1G66400,AT1G66410	c0021_00168,c0021_00170	Bra004165,Bra004166	-	-
AT2G45650,AT2G45660	c0004_00234,c0004_00235	Bra004927,Bra004928	-	Bra000392,Bra000393
AT3G20090,AT3G20100,AT3G20110,AT3G20120,AT3G20130,AT3G20140	c0005_01792,c0005_01793,c0005_01794,c0005_01795	Bra035812,Bra035813,Bra035814	-	-
AT1G22540,AT1G22550,AT1G22570	c0001_01769,c0001_01770,c0001_01771	Bra024520,Bra024519	-	-
AT4G33810,AT4G33820,AT4G33830,AT4G33840,AT4G33860	c0014_00579,c0014_00580,c0014_00581	-	Bra017609,Bra017610	Bra034586,Bra034585,Bra034584
AT5G52300,AT5G52310	c0002_00180,c0002_00182	-	Bra022585,Bra022584	-
AT4G21323,AT4G21326	c0006_01043,c0006_01044	-	Bra038778,Bra038777	-
AT3G19000,AT3G19010	c0005_01686,c0005_01687	Bra022378,Bra022377	-	-
AT3G16440,AT3G16450,AT3G16460,AT3G16470	c0005_01457,c0005_01458,c0005_01459	Bra022161,Bra022160,Bra022159,Bra022157	Bra021179,Bra021178,Bra021177,Bra021176,Bra021175	-
AT5G53990,AT5G54010	c0002_00318,c0002_00319,c0002_00320,c0002_00321	-	Bra022689,Bra022688	Bra029045,Bra029046,Bra029047,Bra029049
AT5G06900,AT5G06905	c0002_02127,c0002_02128	-	-	Bra028715,Bra028714
AT1G66760,AT1G66780	c0021_00191,c0021_00192,c0021_00193,c0021_00194	Bra004187,Bra004188	-	-
AT3G56920,AT3G56930	c0007_00994,c0007_00995	Bra007283,Bra007284	-	-
AT3G26130,AT3G26140	c0003_01411,c0003_01412	Bra025187,Bra025186	-	-
AT1G66690,AT1G66700,AT1G66720	c0021_00183,c0021_00184,c0021_00186,c0021_00187,c0021_00188	Bra004183,Bra004184	-	-
AT1G66210,AT1G66220	c0021_00148,c0021_00149	Bra004153,Bra004154	-	-
AT2G43090,AT2G43100	c0004_00469,c0004_00470	Bra004743,Bra004744	-	-
AT5G48570,AT5G48580		c0003_01087,c0003_01088
AT4G16540,AT4G16550,AT4G16560	c0006_00624,c0006_00628	Bra038485,Bra038484	Bra012708,Bra012707,Bra012705,Bra012704	-
AT4G27860,AT4G27870	c0014_00001,c0014_00002,c0014_00003	Bra026304,Bra026303,Bra026302	Bra019021,Bra019020	-
AT3G15950,AT3G15960	c0005_01409,c0005_01410,c0005_01411	-	Bra021149,Bra021148	-
AT1G70790,AT1G70800,AT1G70810	c0012_00404,c0012_00405	Bra016186,Bra016185	-	Bra003940,Bra003941
AT1G69850,AT1G69860,AT1G69870	c0012_00302,c0012_00303,c0012_00304	Bra016260,Bra016259	-	-
AT1G17010,AT1G17020	c0001_01319,c0001_01320	-	Bra026693,Bra026695	-
AT1G60730,AT1G60750	c0015_00286,c0015_00287,c0015_00288,c0015_00290	Bra027134,Bra027135	Bra031486,Bra031485	-
AT2G37310,AT2G37320	c0004_01020,c0004_01021	-	Bra017196,Bra017195	-
AT5G62340,AT5G62350,AT5G62360	c0003_00488,c0003_00489	Bra010075,Bra010076	-	-
AT5G16230,AT5G16240	c0002_01399,c0002_01400	Bra008631,Bra008632	-	-
AT4G12370,AT4G12382	c0011_00484,c0011_00486,c0011_00487,c0011_00488	-	Bra000770,Bra000771	-
AT1G30400,AT1G30410,AT1G30420	c0001_02340,c0001_02341	Bra032386,Bra032385	-	-
AT2G45410,AT2G45420	c0004_00256,c0004_00257	Bra004908,Bra004910	Bra040312,Bra040311	-
AT3G10480,AT3G10490,AT3G10500	c0005_00848,c0005_00849,c0005_00850	-	Bra034120,Bra034119,Bra034118	Bra001365,Bra001366
AT3G60120,AT3G60130,AT3G60140	c0007_01233,c0007_01234,c0007_01235	Bra007507,Bra007508,Bra007509,Bra007510	Bra014510,Bra014511	-
AT3G19930,AT3G19940	c0005_01775,c0005_01776	-	Bra038245,Bra038243,Bra038244,Bra038242	-
AT5G10520,AT5G10530		c0049_00035,c0049_00036
AT1G62760,AT1G62770	c0026_00188,c0026_00189	Bra027019,Bra027020	-	-
AT5G63800,AT5G63810	c0003_00369,c0003_00370	Bra024237,Bra024238	-	-
AT5G18010,AT5G18020,AT5G18030	c0002_01248,c0002_01250,c0002_01251,c0002_01252	-	Bra006430,Bra006431,Bra006432,Bra006433,Bra006434,Bra006435,Bra006436,Bra006438	-
AT4G10490,AT4G10500	c0028_00144,c0028_00146	-	Bra000712,Bra000713	-
AT1G30700,AT1G30710,AT1G30720,AT1G30730,AT1G30740	c0001_02372,c0001_02373,c0001_02374,c0001_02375	Bra023127,Bra023126,Bra023124,Bra023123,Bra023122	Bra014886,Bra014885	-
AT3G21750,AT3G21760	c0005_01959,c0005_01960,c0005_01962,c0005_01963,c0005_01964	Bra031307,Bra031306,Bra031304,Bra031303	-	Bra001845,Bra001846,Bra001847
AT1G17230,AT1G17240	c0001_01340,c0001_01341	Bra025988,Bra025987	-	-
AT3G16390,AT3G16400,AT3G16410,AT3G16420,AT3G16430	c0005_01454,c0005_01456	-	-	Bra001631,Bra001632
AT3G13290,AT3G13300	c0005_01127,c0005_01128	Bra034692,Bra034693	-	-
AT2G24360,AT2G24370	c0009_00431,c0009_00432	Bra007857,Bra007859,Bra007860	Bra032102,Bra032100	-
AT4G34770,AT4G34790,AT4G34800,AT4G34810	c0014_00677,c0014_00678,c0014_00679,c0014_00680	Bra011564,Bra011563,Bra011562,Bra011561	-	Bra034656,Bra034655,Bra034653
AT1G29490,AT1G29500,AT1G29510	c0001_02264,c0001_02265,c0001_02266,c0001_02267,c0001_02268	Bra032322,Bra032321	-	Bra010826,Bra010827,Bra010828
AT1G07520,AT1G07530	c0001_00541,c0001_00542	-	Bra031581,Bra031580	-
AT1G52290,AT1G52310	c0008_00294,c0008_00296	-	Bra014322,Bra014321	-
AT3G25760,AT3G25770,AT3G25780		c0003_01442,c0003_01444
AT3G56970,AT3G56980	c0007_01000,c0007_01001	Bra007289,Bra007290	Bra014653,Bra014654;Bra014657,Bra014658,Bra014659	Bra003260,Bra003261
AT4G39640,AT4G39650	c0017_00141,c0017_00142	Bra011846,Bra011844	Bra033632,Bra033631	-
AT3G23460,AT3G23470,AT3G23480,AT3G23510,AT3G23530	c0005_02101,c0005_02102	Bra014951,Bra014950	Bra023722,Bra023723	-
AT1G20620,AT1G20630	c0314_00002,c0314_00003	Bra025832,Bra025833	Bra012239,Bra012238	-
AT1G14230,AT1G14240,AT1G14250	c0001_01097,c0001_01098,c0001_01099	Bra019670,Bra019669	-	-
AT1G29660,AT1G29670	c0001_02276,c0001_02277	-	Bra030156,Bra030155	Bra010820,Bra010821
AT1G15770,AT1G15780,AT1G15790	c0001_01227,c0001_01228	Bra026108,Bra026106,Bra026105,Bra026104,Bra026103,Bra026102	Bra026748,Bra026749	-
AT1G17170,AT1G17180,AT1G17190	c0001_01334,c0001_01335,c0001_01336	Bra025995,Bra025994,Bra025993	Bra026679,Bra026680,Bra026681	-
AT3G08720,AT3G08730	c0005_00691,c0005_00693	Bra029713,Bra029712	Bra040057,Bra040056	-
AT4G13810,AT4G13820	c0006_00283,c0006_00284	-	Bra032741,Bra032740	-
AT1G16150,AT1G16160	c0001_01253,c0001_01254	-	Bra026731,Bra026732	-
AT5G62200,AT5G62210	c0003_00499,c0003_00500	-	-	Bra029274,Bra029272
AT2G02230,AT2G02240,AT2G02250		c0003_01570,c0003_01571,c0003_01573
AT3G15850,AT3G15870	c0005_01397,c0005_01398,c0005_01400	Bra027201,Bra027203	-	Bra001609,Bra001610,Bra001611,Bra001612
AT1G12090,AT1G12100	c0001_00932,c0001_00933	-	-	Bra016790,Bra016791
AT1G12280,AT1G12290	c0079_00007,c0079_00008	Bra019755,Bra019754,Bra019753,Bra019752,Bra019751	Bra026923,Bra026924;Bra026977,Bra026978,Bra026979	Bra016781,Bra016782
AT4G15300,AT4G15310	c0006_00477,c0006_00479,c0006_00480	-	Bra012793,Bra012792	-
AT5G59650,AT5G59660,AT5G59670,AT5G59680	c0002_00804,c0002_00806	-	-	Bra006700,Bra006701
AT1G62262,AT1G62280	c0026_00236,c0026_00237	Bra027058,Bra027059	-	-
AT1G78820,AT1G78830,AT1G78850,AT1G78860	c0013_00532,c0013_00533	-	-	Bra003635,Bra003636
AT5G04110,AT5G04130	c0002_02366,c0002_02367	-	Bra005794,Bra005795	-
AT1G72150,AT1G72160	c0012_00526,c0012_00527	-	Bra008012,Bra008013	Bra003891,Bra003892
AT1G49640,AT1G49650,AT1G49660	c0008_00509,c0008_00510,c0008_00513	Bra018809,Bra018808,Bra018807	-	-
AT3G15500,AT3G15510	c0005_01358,c0005_01359	Bra027237,Bra027238	Bra021114,Bra021113	Bra001596,Bra001597
AT3G49570,AT3G49580	c0007_00397,c0007_00398	Bra017974,Bra017975	-	-
AT5G53090,AT5G53100	c0002_00243,c0002_00244	-	Bra022628,Bra022629	-
AT4G20800,AT4G20820,AT4G20830,AT4G20840	c0006_00991,c0006_00992,c0006_00994,c0006_00995,c0006_00996	Bra013472,Bra013473,Bra013475,Bra013476	Bra038799,Bra038798	-
AT2G43880,AT2G43890	c0004_00404,c0004_00405,c0004_00406,c0004_00407,c0004_00408	Bra004789,Bra004790,Bra004791	-	-
AT4G31100,AT4G31110	c0014_00318,c0014_00319	Bra011247,Bra011246,Bra011245	-	-
AT2G29460,AT2G29470,AT2G29480,AT2G29490	c0004_01742,c0004_01743,c0004_01744,c0004_01745	Bra018385,Bra018386	-	-
AT5G27350,AT5G27360	c0003_00945,c0003_00946	-	-	Bra020595,Bra020593,Bra020592
AT1G75280,AT1G75290,AT1G75300	c0013_00186,c0013_00188	Bra015854,Bra015853	-	-
AT3G49190,AT3G49200,AT3G49210	c0007_00363,c0007_00364,c0007_00365	-	-	Bra029938,Bra029939
AT5G37810,AT5G37820	c0016_00410,c0016_00412	-	-	Bra025437,Bra025436,Bra025435
AT1G28360,AT1G28370	c0001_02189,c0001_02190,c0001_02191	Bra032901,Bra032900,Bra032898	Bra030095,Bra030094	Bra010880,Bra010881
AT1G54840,AT1G54850		c0033_00061,c0033_00062,c0033_00063
AT1G11280,AT1G11300	c0001_00857,c0001_00858	-	-	Bra016842,Bra016844
AT3G21230,AT3G21240	c0005_01905,c0005_01906,c0005_01907,c0005_01908	Bra031266,Bra031265,Bra031263,Bra031262	-	Bra001819,Bra001820
AT1G27360,AT1G27370	c0001_02100,c0001_02101	Bra032823,Bra032822	Bra030041,Bra030040	-
AT3G13784,AT3G13790	c0005_01179,c0005_01180	Bra027397,Bra027398	-	-
AT3G19390,AT3G19400	c0005_01722,c0005_01723,c0005_01724	Bra022419,Bra022418	Bra038208,Bra038207,Bra038206	-
AT4G39170,AT4G39180	c0017_00099,c0017_00100	-	-	Bra010699,Bra010700
AT3G14520,AT3G14540	c0005_01260,c0005_01261,c0005_01262	-	Bra021566,Bra021564,Bra021563	-
AT2G42460,AT2G42470,AT2G42480	c0004_00531,c0004_00532	Bra004695,Bra004696,Bra004697,Bra004698,Bra004699,Bra004700,Bra004701,Bra004702	Bra016875,Bra016874,Bra016873,Bra016872	Bra000258,Bra000259
AT3G23220,AT3G23230,AT3G23240	c0005_02076,c0005_02077,c0005_02078	Bra014925,Bra014924	Bra023744,Bra023745,Bra023746,Bra023748	-
AT5G47480,AT5G47490		c0003_01702,c0003_01703
AT1G69920,AT1G69930	c0012_00309,c0012_00310,c0012_00311	Bra016253,Bra016252,Bra016250	Bra007889,Bra007890	-
AT2G44210,AT2G44220,AT2G44240,AT2G44250	c0004_00373,c0004_00374	Bra004815,Bra004816,Bra004818,Bra004819,Bra004820,Bra004821	-	Bra000347,Bra000348
AT2G38530,AT2G38540	c0004_00898,c0004_00899	Bra005098,Bra005099	Bra017113,Bra017112	-
AT1G76360,AT1G76370	c0013_00293,c0013_00294	Bra015757,Bra015756	-	Bra003723,Bra003724
AT4G12010,AT4G12020	c0011_00511,c0011_00512	-	Bra000758,Bra000759	-
AT1G04240,AT1G04250	c0001_00266,c0001_00267	Bra015298,Bra015297	Bra032520,Bra032521	-
AT2G39310,AT2G39330	c0004_00823,c0004_00824	-	Bra017083,Bra017082	-
AT1G75880,AT1G75890,AT1G75900,AT1G75910,AT1G75920,AT1G75930	c0041_00006,c0041_00007,c0041_00008,c0041_00009	Bra015804,Bra015803,Bra015802	-	Bra003736,Bra003737
AT5G17850,AT5G17860	c0002_01261,c0002_01262	Bra002112,Bra002110	-	Bra023640,Bra023641,Bra023643
AT2G45600,AT2G45610	c0004_00239,c0004_00240	Bra004924,Bra004925	-	-
AT5G45810,AT5G45820	c0003_01830,c0003_01831	Bra025051,Bra025052	-	-
AT1G70110,AT1G70130	c0012_00330,c0012_00331	Bra016235,Bra016234	-	-
AT2G22750,AT2G22760,AT2G22770	c0027_00175,c0027_00176,c0027_00178	Bra039927,Bra039926,Bra039924	Bra030210,Bra030208,Bra030207	-
AT1G53060,AT1G53070,AT1G53080	c0008_00216,c0008_00217	Bra019014,Bra019013,Bra019012	-	-
AT1G13080,AT1G13090,AT1G13100,AT1G13110	c0001_01010,c0001_01011,c0001_01012	Bra019809,Bra019808	Bra026929,Bra026930;Bra026933,Bra026934,Bra026936,Bra026937	Bra016740,Bra016741,Bra016743
AT5G59030,AT5G59040	c0002_00763,c0002_00764	-	Bra020328,Bra020329	Bra006724,Bra006725
AT5G03590,AT5G03600,AT5G03610	c0002_02412,c0002_02413,c0002_02414	-	-	Bra028826,Bra028825
AT1G74090,AT1G74100	c0013_00076,c0013_00077	Bra015938,Bra015936,Bra015935	-	Bra003817,Bra003818,Bra003819
AT2G36750,AT2G36760,AT2G36770,AT2G36780,AT2G36790,AT2G36800	c0004_01075,c0004_01076,c0004_01077,c0004_01078	Bra005241,Bra005242,Bra005243,Bra005244,Bra005245,Bra005246	Bra017225,Bra017224	Bra023079,Bra023080,Bra023081
AT4G02850,AT4G02860	c0011_00267,c0011_00268	-	Bra000858,Bra000859	-
AT3G13150,AT3G13160	c0176_00001,c0176_00002	-	Bra039372,Bra039373	-
AT4G37050,AT4G37060,AT4G37070	c0017_00296,c0017_00297	Bra011732,Bra011731,Bra011730	Bra017798,Bra017799	-
AT3G01670,AT3G01680	c0005_00036,c0005_00037	Bra040546,Bra040547	-	-
AT1G79310,AT1G79320,AT1G79330,AT1G79340	c0013_00582,c0013_00583,c0013_00584	Bra035106,Bra035107,Bra035108,Bra035109	-	-
AT5G13740,AT5G13750	c0002_01608,c0002_01609	-	Bra006212,Bra006213	-
AT4G34510,AT4G34520	c0014_00653,c0014_00654	-	-	Bra034635,Bra034634
AT3G01085,AT3G01090	c0005_00102,c0005_00104	-	-	Bra001022,Bra001023
AT4G34131,AT4G34135,AT4G34138	c0014_00610,c0014_00611,c0014_00612	Bra011496,Bra011497,Bra011495,Bra011493,Bra011492	-	Bra034610,Bra034609,Bra034608
AT5G39450,AT5G39460,AT5G39470	c0016_00239,c0016_00240,c0016_00244,c0016_00245	Bra028246,Bra028247,Bra028249,Bra028250	-	-
AT5G06860,AT5G06870	c0002_02129,c0002_02130	-	Bra005916,Bra005917,Bra005918,Bra005919	-
AT1G14210,AT1G14220	c0001_01095,c0001_01096	-	Bra026846,Bra026847	-
AT2G03750,AT2G03760,AT2G03770	c0003_01478,c0003_01479,c0003_01480	-	Bra026540,Bra026539	Bra017373,Bra017372,Bra017371,Bra017370,Bra017369,Bra017368
AT1G61810,AT1G61820	c0015_00423,c0015_00424,c0015_00425	-	Bra031392,Bra028384,Bra028383	-
AT2G42350,AT2G42360	c0004_00539,c0004_00540	Bra004685,Bra004686,Bra004687	Bra016881,Bra016880	-
AT5G08370,AT5G08380	c0002_02001,c0002_02002	-	-	Bra028661,Bra028660
AT1G72840,AT1G72850,AT1G72860,AT1G72870	c0012_00592,c0012_00593,c0012_00595,c0012_00596	-	Bra008053,Bra008055,Bra008056	-
AT1G09880,AT1G09890,AT1G09910	c0056_00018,c0056_00020,c0056_00021	Bra019979,Bra019978,Bra019976	-	-
AT1G62600,AT1G62620	c0026_00202,c0026_00205,c0026_00206	Bra027032,Bra027033,Bra027035	-	-
AT5G51930,AT5G51950	c0002_00144,c0002_00145,c0002_00146	-	Bra022571,Bra022570	Bra029151,Bra029152
AT1G20480,AT1G20490,AT1G20500,AT1G20510	c0001_01588,c0001_01589,c0001_01590,c0001_01591	Bra025822,Bra025823	Bra012233,Bra012232	Bra016463,Bra016464,Bra016465,Bra016466
AT1G77990,AT1G78000	c0013_00457,c0013_00458	Bra015642,Bra015641	-	-
AT5G58770,AT5G58780,AT5G58782,AT5G58784	c0002_00721,c0002_00722	Bra002619,Bra002618	Bra020353,Bra020354	-
AT5G64100,AT5G64110,AT5G64120	c0003_00339,c0003_00340	Bra024267,Bra024268,Bra024269	-	Bra031934,Bra031933
AT5G53510,AT5G53520	c0002_00281,c0002_00282	-	-	Bra029064,Bra029065
AT5G46040,AT5G46050	c0003_01813,c0003_01814	-	Bra022012,Bra022013	-
AT1G80555,AT1G80560	c0013_00664,c0013_00665	-	Bra008463,Bra008464,Bra008466	-
AT2G37170,AT2G37180	c0004_01036,c0004_01037	Bra005215,Bra005216	-	Bra023102,Bra023103
AT1G78450,AT1G78460	c0013_00500,c0013_00501	Bra035039,Bra035040	-	-
AT2G23550,AT2G23560,AT2G23570,AT2G23580,AT2G23590,AT2G23600,AT2G23610,AT2G23620	c0009_00510,c0009_00511,c0009_00512	-	Bra032161,Bra032160,Bra032158,Bra032157	-
AT4G15050,AT4G15053,AT4G15056	c0006_00446,c0006_00447	Bra039570,Bra039571	-	-
AT2G19970,AT2G19980,AT2G19990	c0068_00006,c0068_00007,c0068_00009	Bra039032,Bra039031	-	-
AT4G15660,AT4G15670,AT4G15680,AT4G15690,AT4G15700	c0006_00517,c0006_00518,c0006_00519,c0006_00520,c0006_00521	Bra033504,Bra033503,Bra033501	-	Bra038076,Bra038075
AT1G11210,AT1G11220,AT1G11230	c0001_00851,c0001_00852	Bra019875,Bra019874	-	-
AT3G57700,AT3G57710,AT3G57720,AT3G57730,AT3G57740,AT3G57750,AT3G57760,AT3G57770	c0007_01061,c0007_01062	Bra007350,Bra007351,Bra007352,Bra007353,Bra007355,Bra007356,Bra007357	Bra014606,Bra014607,Bra014608,Bra014609	Bra003298,Bra003299
AT2G42430,AT2G42440	c0004_00534,c0004_00535	-	Bra016877,Bra016876	-
AT4G23990,AT4G24000,AT4G24010	c0006_01281,c0006_01283,c0006_01284	Bra013749,Bra013750	-	-
AT4G11310,AT4G11320	c0011_00568,c0011_00569	-	-	Bra033146,Bra033148
AT1G69520,AT1G69523,AT1G69526	c0012_00268,c0012_00269,c0012_00270	Bra004388,Bra004389,Bra004390,Bra004391	-	-
AT1G27020,AT1G27030	c0001_01932,c0001_01933,c0001_01934	-	Bra012433,Bra012432	-
AT3G09900,AT3G09910	c0005_00798,c0005_00799	Bra029804,Bra029803	-	-
AT2G03240,AT2G03250,AT2G03260	c0003_01519,c0003_01520	Bra024782,Bra024783,Bra024784	-	-
AT5G07510,AT5G07520,AT5G07530,AT5G07540	c0002_02069,c0002_02070	-	Bra005943,Bra005944	-
AT4G33710,AT4G33720,AT4G33730	c0014_00569,c0014_00570,c0014_00571,c0014_00572	Bra011465,Bra011464	Bra036988,Bra036987,Bra036986,Bra036984;Bra036982,Bra036981	-
AT3G57010,AT3G57020,AT3G57030	c0007_01004,c0007_01005,c0007_01006	Bra007293,Bra007294	-	-
AT2G31210,AT2G31215,AT2G31220	c0004_01598,c0004_01599	Bra018269,Bra018270	Bra021710,Bra021711	-
AT2G20950,AT2G20960	c0027_00014,c0027_00015	Bra031153,Bra031152	Bra000586,Bra000587	-
AT5G46930,AT5G46940,AT5G46950,AT5G46960,AT5G46970,AT5G46980,AT5G46990	c0003_01736,c0003_01738,c0003_01739,c0003_01740,c0003_01741,c0003_01742	Bra024973,Bra024974,Bra024975	Bra022087,Bra022088	-
AT3G62930,AT3G62950,AT3G62960	c0007_01460,c0007_01462	-	Bra014379,Bra014380,Bra014382	-
AT3G06620,AT3G06630,AT3G06640	c0005_00536,c0005_00537,c0005_00538	Bra029594,Bra029593	Bra040282,Bra040281	-
AT5G55320,AT5G55330,AT5G55340,AT5G55350,AT5G55360,AT5G55370,AT5G55380	c0002_00429,c0002_00430,c0002_00431,c0002_00432,c0002_00433	Bra002911,Bra002910,Bra002909	-	Bra028984,Bra028985
AT2G37760,AT2G37770,AT2G37790	c0004_00970,c0004_00972,c0004_00973,c0004_00974	Bra005158,Bra005159,Bra005161,Bra005162,Bra005163	-	Bra000018,Bra000019
AT3G61390,AT3G61410	c0007_01331,c0007_01332,c0007_01333	Bra007600,Bra007601	Bra014438,Bra014439	-
AT4G37970,AT4G37980,AT4G37990	c0017_00203,c0017_00204,c0017_00205	Bra011799,Bra011798	-	Bra010625,Bra010626,Bra010627
AT3G23030,AT3G23050	c0005_02059,c0005_02060	-	-	Bra001899,Bra001900
AT2G21100,AT2G21110	c0027_00025,c0027_00026	Bra031162,Bra031161	-	-
AT2G32660,AT2G32680	c0004_01467,c0004_01469	Bra005562,Bra005563	Bra021748,Bra021749,Bra021750,Bra021751;Bra021802,Bra021803,Bra021805,Bra021806	-
AT1G21100,AT1G21110,AT1G21120,AT1G21130	c0001_01641,c0001_01642	Bra025874,Bra025875,Bra025876	Bra012270,Bra012269,Bra012268	Bra016432,Bra016433
AT1G28640,AT1G28650,AT1G28660,AT1G28670	c0337_00003,c0337_00004,c0337_00005	-	Bra030111,Bra030110	Bra010857,Bra010858
AT5G24990,AT5G25010,AT5G25020	c0003_00766,c0003_00767	Bra009807,Bra009809	-	-
AT3G20590,AT3G20600,AT3G20610	c0005_01842,c0005_01844,c0005_01845,c0005_01846	Bra035766,Bra035767	-	-
AT5G02490,AT5G02500	c0002_02490,c0002_02491	Bra009583,Bra009584	-	-
AT1G78320,AT1G78340	c0013_00489,c0013_00490,c0013_00491,c0013_00492	Bra035029,Bra035031	-	-
AT2G21520,AT2G21540	c0027_00068,c0027_00070	-	Bra030295,Bra030294	-

## Sheet: common TDs in 4 species
A.lyrata tandem arrays	A.thalina tandem arrays	T.parvula tandem arrays	B.rapa LF tandem arrays	B.rapa MF1 tandem arrays	B.rapa MF2 tandem arrays
Al_scaffold_0007_1096,Al_scaffold_0007_1097	AT4G30110,AT4G30120	c0014_00213,c0014_00214	Bra011165,Bra011164	-	-
Al_scaffold_0001_2559,scaffold_102789.1,fgenesh1_pm.C_scaffold_1002056,Al_scaffold_0001_2562	AT1G27170,AT1G27180	c0001_01914,c0001_01915,c0001_01916	Bra024652,Bra024651	-	Bra016312,Bra016313,Bra016314
fgenesh2_kg.1__825__AT1G08135.1,fgenesh2_kg.1__826__AT1G08140.1,fgenesh2_kg.1__830__AT1G08150.1	AT1G08135,AT1G08140,AT1G08150	c0001_00580,c0001_00581,c0001_00582	Bra018651,Bra018650	Bra031614,Bra031613	-
fgenesh1_pm.C_scaffold_8001923,fgenesh2_kg.8__2364__AT5G63590.1,Al_scaffold_0008_2892,fgenesh2_kg.8__2365__AT5G63600.1	AT5G63580,AT5G63590,AT5G63595,AT5G63600	c0003_00386,c0003_00387,c0003_00388	Bra038647,Bra038648	-	Bra029212,Bra029211
fgenesh1_pm.C_scaffold_6001921,Al_scaffold_0006_2299,scaffold_602495.1,Al_scaffold_0006_2302	AT5G24140,AT5G24150,AT5G24155,AT5G24160	c0003_00706,c0003_00707	Bra009737,Bra009738	-	Bra029393,Bra029392,Bra029391
fgenesh2_kg.8__245__AT5G45540.1,Al_scaffold_0008_290,fgenesh2_kg.8__246__AT5G45530.1	AT5G45530,AT5G45540	c0003_01859,c0003_01860	Bra025072,Bra025073	-	-
fgenesh2_kg.8__2407__AT5G63980.1,fgenesh2_kg.8__2409__AT5G63990.1,fgenesh2_kg.8__2410__AT5G64000.1	AT5G63980,AT5G63990,AT5G64000	c0003_00350,c0003_00351,c0003_00352	Bra024255,Bra024256,Bra024257	-	-
fgenesh2_kg.3__1383__AT3G13080.1,Al_scaffold_0003_1332,Al_scaffold_0003_1333	AT3G13080,AT3G13090,AT3G13100	c0005_01104,c0005_01105,c0005_01106	-	Bra039368,Bra039369	Bra001488,Bra001490
fgenesh2_kg.7__2176__AT4G21410.1,fgenesh2_kg.7__2177__AT4G21400.1,scaffold_702280.1,scaffold_702281.1,Al_scaffold_0007_2039	AT4G21366,AT4G21380,AT4G21390,AT4G21400,AT4G21410	c0006_01052,c0006_01053,c0006_01055,c0006_01056	Bra013522,Bra013523,Bra013524	-	-
scaffold_702611.1,fgenesh2_kg.7__2479__AT4G18210.1,Al_scaffold_0007_2365,Al_scaffold_0007_2366,Al_scaffold_0007_2367	AT4G18190,AT4G18195,AT4G18197,AT4G18205,AT4G18210,AT4G18220	c0006_00702,c0006_00704,c0006_00705	Bra013290,Bra013291,Bra013292	-	-
fgenesh1_pg.C_scaffold_1002043,fgenesh1_pm.C_scaffold_1001901,fgenesh2_kg.1__2430__AT1G22360.2,fgenesh2_kg.1__2432__AT1G22370.2,fgenesh1_pm.C_scaffold_1001903,fgenesh2_kg.1__2434__AT1G22400.1	AT1G22340,AT1G22360,AT1G22370,AT1G22380,AT1G22400	c0001_01743,c0001_01744,c0001_01745,c0001_01746,c0001_01748	Bra031388,Bra031387,Bra031386	Bra012324,Bra012323,Bra012322	-
fgenesh2_kg.4__1063__AT2G30860.1,fgenesh2_kg.4__1064__AT2G30870.1	AT2G30860,AT2G30870	c0004_01634,c0004_01636	-	-	Bra022815,Bra022816
fgenesh2_kg.2__1400__AT1G71390.1,fgenesh2_kg.2__1401__AT1G71400.1	AT1G71390,AT1G71400	c0012_00459,c0012_00460	Bra016142,Bra016141	-	Bra003925,Bra003927
fgenesh2_kg.1__4482__AT1G54010.1,fgenesh2_kg.1__4485__AT1G54020.2,fgenesh2_kg.1__4487__AT1G54030.1	AT1G53990,AT1G54000,AT1G54010,AT1G54020,AT1G54030	c0008_00141,c0008_00142,c0008_00143,c0008_00144	Bra037957,Bra037955,Bra037954	Bra030911,Bra030912,Bra030913,Bra030915,Bra030916,Bra030917,Bra030918	Bra014375,Bra014374,Bra014372,Bra014371
scaffold_700544.1,scaffold_700546.1	AT4G35690,AT4G35710	c0017_00423,c0017_00425	Bra011632,Bra011630	-	-
fgenesh2_kg.3__366__AT3G04060.1,fgenesh2_kg.3__367__AT3G04070.1	AT3G04060,AT3G04070	c0005_00290,c0005_00291	Bra040152,Bra040153	-	-
scaffold_701277.1,fgenesh2_kg.7__1231__AT4G29650.1,scaffold_701280.1,fgenesh2_kg.7__1232__AT4G29620.1,fgenesh2_kg.7__1233__AT4G29600.1	AT4G29570,AT4G29580,AT4G29600,AT4G29610,AT4G29620,AT4G29630,AT4G29640,AT4G29650	c0014_00162,c0014_00163	-	Bra024141,Bra024140	-
fgenesh2_kg.8__2543__AT5G65050.2,Al_scaffold_0008_3055	AT5G65050,AT5G65060,AT5G65070,AT5G65080	c0003_00248,c0003_00250	Bra024350,Bra024351	-	Bra031888,Bra031886
fgenesh2_kg.2__1771__AT1G75030.1,scaffold_202445.1,fgenesh1_pm.C_scaffold_2001469	AT1G75030,AT1G75040,AT1G75050	c0013_00160,c0013_00161,c0013_00162	Bra015874,Bra015873,Bra015871,Bra015870	-	-
Al_scaffold_0005_2796,fgenesh2_kg.5__2321__AT3G58750.1	AT3G58740,AT3G58750	c0007_01141,c0007_01142,c0007_01143	Bra007416,Bra007417	-	-
scaffold_801621.1,Al_scaffold_0008_1558	AT5G51860,AT5G51870	c0002_00137,c0002_00138,c0002_00139	-	-	Bra029154,Bra029155
fgenesh2_kg.3__1996__AT3G18070.1,fgenesh2_kg.3__1998__AT3G18080.1	AT3G18070,AT3G18080	c0005_01596,c0005_01597	-	Bra021292,Bra021291	-
Al_scaffold_0007_3494,Al_scaffold_0007_3496,Al_scaffold_0007_3497	AT5G41540,AT5G41550	c0016_00050,c0016_00051	Bra025494,Bra025493	Bra028499,Bra028500	-
fgenesh1_pg.C_scaffold_4001341,fgenesh2_kg.4__1228__AT2G32400.1	AT2G32390,AT2G32400	c0004_01491,c0004_01492	Bra005589,Bra005591	Bra021780,Bra021781,Bra021782,Bra021783,Bra021784,Bra021785,Bra021786	-
Al_scaffold_0004_3121,scaffold_403368.1,scaffold_403369.1,fgenesh2_kg.4__2632__AT2G44470.3,fgenesh2_kg.4__2633__AT2G44480.1,scaffold_403374.1	AT2G44450,AT2G44460,AT2G44470,AT2G44480,AT2G44490	c0004_00351,c0004_00352,c0004_00353	Bra004833,Bra004835,Bra004836,Bra004837,Bra004838,Bra004839,Bra004840	Bra037648,Bra037647	-
fgenesh2_kg.1__2732__AT1G26420.1,fgenesh2_kg.1__2733__AT1G26410.1,Al_scaffold_0001_2665;fgenesh2_kg.1__2734__AT1G26390.1,fgenesh2_kg.1__2735__AT1G26380.1	AT1G26380,AT1G26390,AT1G26400,AT1G26410,AT1G26420	c0001_01980,c0001_01981	Bra024719,Bra024717	-	-
scaffold_301568.1,fgenesh2_kg.3__1458__AT3G13660.1,fgenesh1_pm.C_scaffold_3001159	AT3G13650,AT3G13660,AT3G13662	c0005_01164,c0005_01165	-	Bra021497,Bra021496,Bra021495	-
scaffold_803427.1,fgenesh2_kg.8__2726__AT5G66900.1,Al_scaffold_0008_3233	AT5G66890,AT5G66900,AT5G66910	c0003_00093,c0003_00094,c0003_00095	Bra012116,Bra012114	-	-
fgenesh1_pg.C_scaffold_6003142,scaffold_603983.1;fgenesh1_pg.C_scaffold_6003148,scaffold_603990.1	AT4G02733,AT4G02740,AT4G02760	c0011_00256,c0011_00257	-	Bra000865,Bra000866	-
Al_scaffold_0004_3241,fgenesh1_pg.C_scaffold_4002708,fgenesh1_pm.C_scaffold_4002268	AT2G45550,AT2G45560,AT2G45570,AT2G45580	c0004_00242,c0004_00243,c0004_00244,c0004_00245	-	Bra039330,Bra039329,Bra039328,Bra039327	-
scaffold_500862.1,scaffold_500863.1,fgenesh1_pm.C_scaffold_5000501,fgenesh2_kg.5__645__AT3G28830.1	AT3G28780,AT3G28790,AT3G28810,AT3G28820,AT3G28830,AT3G28840	c0003_01222,c0003_01223,c0003_01224,c0003_01225	Bra025356,Bra025355,Bra025354	-	-
fgenesh2_kg.8__198__AT5G45960.1,fgenesh2_kg.8__199__AT5G45950.1	AT5G45950,AT5G45960	c0003_01820,c0003_01821	-	Bra022002,Bra022003	-
scaffold_803395.1,fgenesh2_kg.8__2700__AT5G67160.1,scaffold_803397.1	AT5G67150,AT5G67160	c0003_00116,c0003_00117,c0003_00118,c0003_00119	Bra012138,Bra012137	-	-
fgenesh2_kg.5__1127__AT3G47730.1,fgenesh2_kg.5__1128__AT3G47740.1,fgenesh2_kg.5__1129__AT3G47750.1,fgenesh2_kg.5__1130__AT3G47770.1,fgenesh2_kg.5__1131__AT3G47780.1,fgenesh2_kg.5__1132__AT3G47790.1	AT3G47730,AT3G47740,AT3G47750,AT3G47760,AT3G47770,AT3G47780,AT3G47790	c0007_00243,c0007_00244,c0007_00245	Bra018113,Bra018114,Bra018115,Bra018116	-	Bra033786,Bra033785
fgenesh2_kg.7__623__AT4G34650.1,scaffold_700663.1	AT4G34640,AT4G34650	c0014_00665,c0014_00666	Bra011549,Bra011548	Bra017667,Bra017668	-
fgenesh2_kg.6__842__AT5G08670.1,fgenesh2_kg.6__844__AT5G08680.1,fgenesh2_kg.6__845__AT5G08670.1	AT5G08670,AT5G08680,AT5G08690	c0002_01968,c0002_01969,c0002_01970	-	Bra006013,Bra006014	Bra028649,Bra028648
fgenesh2_kg.3__821__AT3G07820.1,fgenesh2_kg.3__822__AT3G07830.1,fgenesh2_kg.3__823__AT3G07850.1	AT3G07820,AT3G07830,AT3G07840,AT3G07850	c0005_00653,c0005_00654,c0005_00655	Bra029683,Bra029682	Bra040035,Bra040036,Bra040034,Bra040032	Bra001268,Bra001269,Bra001270
fgenesh2_kg.2__1670__AT1G74000.1,fgenesh2_kg.2__1671__AT1G74010.1,fgenesh2_kg.2__1672__AT1G74020.1	AT1G74000,AT1G74010,AT1G74020	c0013_00064,c0013_00065,c0013_00066,c0013_00067	Bra015944,Bra015943	Bra008125,Bra008124,Bra008126,Bra008127	-
scaffold_400529.1,fgenesh1_pg.C_scaffold_4000392	AT2G24696,AT2G24700	c0009_00401,c0009_00402	Bra007835,Bra007836	Bra032079,Bra032078,Bra032077,Bra032076,Bra032075	-
fgenesh2_kg.2__2047__AT1G77520.1,fgenesh2_kg.2__2048__AT1G77530.1	AT1G77520,AT1G77530	c0013_00412,c0013_00413	-	-	Bra003680,Bra003681,Bra003682
fgenesh2_kg.7__2327__AT4G19690.2,fgenesh2_kg.7__2329__AT4G19680.2	AT4G19680,AT4G19690	c0006_00930,c0006_00931,c0006_00932	Bra013418,Bra013419,Bra013420,Bra013421,Bra013422	Bra012535,Bra012534,Bra012533	-
fgenesh1_pg.C_scaffold_3000970,fgenesh2_kg.3__1108__AT3G10720.2	AT3G10710,AT3G10720	c0005_00877,c0005_00878	-	Bra034140,Bra034139	-
Al_scaffold_0008_2573,fgenesh1_pm.C_scaffold_8001671	AT5G60770,AT5G60780	c0002_00897,c0002_00898	Bra002453,Bra002451	-	-
fgenesh2_kg.4__2321__AT2G41800.1,fgenesh2_kg.4__2322__AT2G41810.1	AT2G41800,AT2G41810	c0004_00585,c0004_00586	Bra004650,Bra004651	-	-
Al_scaffold_0005_802,scaffold_500883.1,scaffold_500884.1	AT3G28930,AT3G28940,AT3G28950	c0003_01211,c0003_01212	Bra025368,Bra025367,Bra025366,Bra025365	-	-
scaffold_500135.1,scaffold_500136.1	AT2G02070,AT2G02080	c0003_01582,c0003_01583	Bra024833,Bra024834	-	-
fgenesh1_pm.C_scaffold_7001543,Al_scaffold_0007_1824,Al_scaffold_0007_1825,Al_scaffold_0007_1827;scaffold_702020.1,Al_scaffold_0007_1831,fgenesh2_kg.7__1977__AT4G23210.2,Al_scaffold_0007_1833,fgenesh2_kg.7__1979__AT4G23180.1,Al_scaffold_0007_1835,Al_scaffold_0007_1836,fgenesh2_kg.7__1980__AT4G23150.1,Al_scaffold_0007_1838,fgenesh2_kg.7__1981__AT4G23130.2	AT4G23220,AT4G23230,AT4G23240,AT4G23250,AT4G23260,AT4G23270,AT4G23280,AT4G23290,AT4G23300,AT4G23310,AT4G23320	c0006_01210,c0006_01211,c0006_01212,c0006_01213,c0006_01214,c0006_01215,c0006_01216,c0006_01217,c0006_01218	Bra013676,Bra013677,Bra013678,Bra013679,Bra013681,Bra013682,Bra013683,Bra013684	Bra019326,Bra019324,Bra019323,Bra019322,Bra019321,Bra019320,Bra019319	Bra020821,Bra020820
scaffold_801870.1,Al_scaffold_0008_1784;fgenesh1_pg.C_scaffold_8001414,fgenesh1_pg.C_scaffold_8001416	AT5G53780,AT5G53790	c0002_00300,c0002_00301	-	Bra022671,Bra022669	-
scaffold_601991.1,fgenesh2_kg.6__1928__AT5G19100.1,fgenesh1_pg.C_scaffold_6001606	AT5G19100,AT5G19110,AT5G19120	c0002_01159,c0002_01160,c0002_01161,c0002_01162	Bra002214,Bra002212,Bra002211,Bra002210	-	Bra023703,Bra023704,Bra023705
fgenesh2_kg.6__750__AT5G07850.1,fgenesh2_kg.6__751__AT5G07870.1	AT5G07850,AT5G07860,AT5G07870	c0002_02045,c0002_02046	-	-	Bra028682,Bra028681
scaffold_700634.1,scaffold_700635.1	AT4G34920,AT4G34930	c0014_00689,c0014_00690	-	-	Bra034664,Bra034663
fgenesh2_kg.7__167__AT4G39550.1,scaffold_700164.1;fgenesh1_pm.C_scaffold_7000135,fgenesh2_kg.7__170__AT4G39570.1,scaffold_700177.1,fgenesh2_kg.7__172__AT4G39590.1,scaffold_700179.1	AT4G39550,AT4G39560,AT4G39570,AT4G39580,AT4G39590,AT4G39600	c0017_00134,c0017_00135,c0017_00137	Bra011856,Bra011854,Bra011853,Bra011852,Bra011851	Bra033628,Bra033627	-
fgenesh2_kg.6__3108__AT4G11460.1,Al_scaffold_0006_3317,fgenesh2_kg.6__3109__AT4G11480.1,Al_scaffold_0006_3320;Al_scaffold_0006_3322,Al_scaffold_0006_3323,Al_scaffold_0006_3324	AT4G11460,AT4G11470,AT4G11480,AT4G11490	c0011_00552,c0011_00553	-	Bra000744,Bra000745,Bra000746	-
fgenesh2_kg.7__318__AT4G37370.1,fgenesh1_pg.C_scaffold_7000275,fgenesh2_kg.7__319__AT4G37340.1,scaffold_700354.1,fgenesh2_kg.7__321__AT4G37320.1,fgenesh2_kg.7__322__AT4G37310.1	AT4G37310,AT4G37320,AT4G37330,AT4G37340,AT4G37360,AT4G37370	c0017_00266,c0017_00267,c0017_00268,c0017_00269,c0017_00270,c0017_00271	-	Bra017817,Bra017818,Bra017819	Bra010596,Bra010597,Bra010598
scaffold_601353.1,fgenesh2_kg.6__1297__AT5G13440.1	AT5G13430,AT5G13440	c0002_01635,c0002_01636	-	Bra006198,Bra006199	Bra023411,Bra023412
scaffold_701979.1,fgenesh2_kg.7__1941__AT4G23590.1	AT4G23590,AT4G23600	c0006_01242,c0006_01243	-	Bra019294,Bra019293,Bra019291	-
fgenesh1_pg.C_scaffold_5002191,fgenesh2_kg.5__2160__AT3G57260.1,fgenesh2_kg.5__2161__AT3G57270.1	AT3G57240,AT3G57260,AT3G57270	c0007_01022,c0007_01023,c0007_01024	Bra007313,Bra007314,Bra007315	Bra014635,Bra014636,Bra014637,Bra014638,Bra014640	-
fgenesh1_pg.C_scaffold_6000824,scaffold_601037.1	AT5G10220,AT5G10230	c0117_00001,c0117_00002	Bra009048,Bra009049	-	-
fgenesh2_kg.8__1156__AT5G52750.1,fgenesh1_pm.C_scaffold_8000979,fgenesh1_pg.C_scaffold_8001300	AT5G52750,AT5G52760,AT5G52770	c0002_00209,c0002_00210,c0002_00212,c0002_00213	Bra003115,Bra003114	Bra022609,Bra022607,Bra022606,Bra022605	-
scaffold_701266.1,fgenesh2_kg.7__1225__AT4G29700.1,fgenesh2_kg.7__1226__AT4G29690.1,fgenesh2_kg.7__1227__AT4G29680.1	AT4G29680,AT4G29690,AT4G29700,AT4G29710	c0014_00166,c0014_00167	Bra011130,Bra011129,Bra011128	-	Bra010320,Bra010321
fgenesh2_kg.1__1562__AT1G14370.1,fgenesh2_kg.1__1566__AT1G14390.1	AT1G14370,AT1G14390	c0001_01112,c0001_01114	Bra019656,Bra019654	-	-
fgenesh1_pm.C_scaffold_6002567,fgenesh2_kg.6__3170__AT4G12310.1	AT4G12300,AT4G12310,AT4G12320,AT4G12330	c0011_00491,c0011_00492,c0011_00493	-	Bra000768,Bra000769	-
fgenesh2_kg.7__2559__AT4G17500.1,fgenesh2_kg.7__2560__AT4G17490.1	AT4G17490,AT4G17500	c0006_00776,c0006_00777	Bra040158,Bra040159	-	Bra021049,Bra021048,Bra021047
Al_scaffold_0008_2366,scaffold_802490.1,fgenesh2_kg.8__1825__AT5G58830.1,Al_scaffold_0008_2368	AT5G58820,AT5G58830,AT5G58840	c0002_00725,c0002_00726	-	Bra020347,Bra020348,Bra020349,Bra020350,Bra020351	-
fgenesh2_kg.8__1805__AT5G58670.1,Al_scaffold_0008_2352,fgenesh2_kg.8__1809__AT5G58700.1	AT5G58670,AT5G58690,AT5G58700	c0002_00713,c0002_00714,c0002_00715	Bra002627,Bra002626,Bra002625	Bra020359,Bra020361	-
fgenesh2_kg.3__552__AT3G05610.1,scaffold_300618.1,fgenesh2_kg.3__553__AT3G05620.1	AT3G05610,AT3G05620	c0005_00433,c0005_00434	Bra039419,Bra039420,Bra039421	-	-
Al_scaffold_0002_102,Al_scaffold_0002_103,fgenesh1_pg.C_scaffold_2000089	AT1G63860,AT1G63870,AT1G63880	c0026_00079,c0026_00081,c0026_00082,c0026_00083	-	Bra027780,Bra027779,Bra027778,Bra027777,Bra027775,Bra027774	-
fgenesh2_kg.3__1421__AT3G13390.1,fgenesh2_kg.3__1422__AT3G13400.1	AT3G13390,AT3G13400	c0005_01137,c0005_01138	Bra034679,Bra034680	Bra039388,Bra039389	Bra001503,Bra001504
Al_scaffold_0002_2761,fgenesh1_pm.C_scaffold_2001960	AT1G80330,AT1G80340	c0013_00689,c0013_00690	-	Bra008480,Bra008481	-
fgenesh2_kg.7__1674__AT4G25790.1,fgenesh2_kg.7__1675__AT4G25780.1	AT4G25780,AT4G25790	c0006_01458,c0006_01459	Bra013919,Bra013920	-	-
fgenesh2_kg.1__696__AT1G07240.1,scaffold_100730.1,fgenesh2_kg.1__697__AT1G07260.1	AT1G07240,AT1G07250,AT1G07260	c0001_00520,c0001_00521,c0001_00522	Bra015568,Bra015567	-	-
scaffold_401752.1,scaffold_401753.1	AT2G32020,AT2G32030	c0004_01523,c0004_01524,c0004_01525	-	Bra021770,Bra021771	-
fgenesh2_kg.8__2086__AT5G61180.1,scaffold_802760.1,fgenesh2_kg.8__2087__AT5G61190.1	AT5G61180,AT5G61190	c0003_00590,c0003_00591	-	-	Bra029330,Bra029329
fgenesh2_kg.6__20__AT5G01820.1,scaffold_600023.1	AT5G01810,AT5G01820	c0002_02583,c0002_02584	-	-	Bra028912,Bra028911
fgenesh2_kg.3__196__AT3G02580.1,scaffold_300205.1,fgenesh2_kg.3__197__AT3G02590.1	AT3G02580,AT3G02590	c0005_00158,c0005_00159	-	-	Bra001053,Bra001054,Bra001055
Al_scaffold_0007_2086,fgenesh2_kg.7__2228__AT4G20910.1	AT4G20910,AT4G20920	c0006_01003,c0006_01004	Bra013482,Bra013483,Bra013484	-	-
fgenesh2_kg.7__3452__AT5G39730.1,scaffold_704072.1	AT5G39720,AT5G39730	c0016_00220,c0016_00221	Bra025649,Bra025647	-	-
scaffold_402705.1,scaffold_402706.1	AT2G39518,AT2G39530	c0004_00806,c0004_00807	-	Bra017067,Bra017066,Bra017065	-
fgenesh2_kg.6__53__AT5G01560.1,Al_scaffold_0006_50,fgenesh2_kg.6__55__AT5G01540.1	AT5G01540,AT5G01550,AT5G01560	c0002_02563,c0002_02564	-	Bra005680,Bra005681	-
Al_scaffold_0001_67,fgenesh2_kg.1__73__AT1G01580.1	AT1G01580,AT1G01590	c0001_00061,c0001_00062	-	Bra032640,Bra032641	-
fgenesh1_pm.C_scaffold_6000576,fgenesh2_kg.6__707__AT5G07420.1,fgenesh2_kg.6__708__AT5G07430.1	AT5G07410,AT5G07420,AT5G07430	c0002_02079,c0002_02080,c0002_02081	-	-	Bra028699,Bra028698
fgenesh2_kg.1__2603__AT1G23880.1,fgenesh2_kg.1__2605__AT1G23890.2	AT1G23880,AT1G23890	c0001_01878,c0001_01879	Bra024626,Bra024625	-	-
fgenesh2_kg.6__713__AT5G07460.1,scaffold_600750.1	AT5G07460,AT5G07470	c0002_02075,c0002_02076	-	Bra005936,Bra005937,Bra005938,Bra005939,Bra005940	-
fgenesh2_kg.3__3193__AT2G19770.1,fgenesh2_kg.3__3194__AT2G19760.1	AT2G19760,AT2G19770	c0020_00109,c0020_00110	Bra039019,Bra039018	-	Bra036707,Bra036705
fgenesh2_kg.1__2702__AT1G26610.1,fgenesh2_kg.1__2704__AT1G26590.1	AT1G26590,AT1G26610	c0001_01969,c0001_01970	Bra024706,Bra024704	Bra012452,Bra012450	Bra016278,Bra016280
scaffold_802561.1,fgenesh2_kg.8__1875__AT5G59320.1,Al_scaffold_0008_2426	AT5G59310,AT5G59320,AT5G59330	c0002_00769,c0002_00771	-	Bra020322,Bra020323	-
scaffold_602363.1,scaffold_602364.1,fgenesh1_pm.C_scaffold_6001819	AT5G23010,AT5G23020	c0003_00624,c0003_00625	Bra013011,Bra013009	-	Bra029356,Bra029355
scaffold_601623.1,fgenesh2_kg.6__1572__AT5G15900.1	AT5G15890,AT5G15900	c0002_01425,c0002_01426	Bra008663,Bra008664,Bra008666	-	-
scaffold_702320.1,scaffold_702321.1	AT4G21030,AT4G21040,AT4G21050	c0006_01012,c0006_01013,c0006_01015,c0006_01016,c0006_01017	Bra013490,Bra013492,Bra013493,Bra013494	Bra038790,Bra038789	Bra020881,Bra020880
fgenesh2_kg.7__3400__AT5G40240.1,fgenesh1_pm.C_scaffold_7002710,fgenesh1_pm.C_scaffold_7002711	AT5G40230,AT5G40240	c0016_00167,c0016_00168,c0016_00169,c0016_00170	Bra025599,Bra025598	Bra028450,Bra028451,Bra028452	Bra030338,Bra030337,Bra030336
Al_scaffold_0001_58,fgenesh1_pg.C_scaffold_1000054	AT1G01660,AT1G01670,AT1G01680	c0001_00052,c0001_00053,c0001_00054	Bra033244,Bra033243,Bra033242	-	-
fgenesh2_kg.8__2142__AT5G61590.1,fgenesh2_kg.8__2143__AT5G61600.1	AT5G61590,AT5G61600	c0003_00554,c0003_00555	Bra012939,Bra012938	-	-
fgenesh2_kg.3__1918__AT3G17410.1,fgenesh2_kg.3__1919__AT3G17420.1	AT3G17410,AT3G17420	c0044_00037,c0044_00038	Bra022214,Bra022213	Bra021253,Bra021250,Bra021251	-
fgenesh1_pg.C_scaffold_7002432,Al_scaffold_0007_2765,fgenesh1_pm.C_scaffold_7002214	AT4G15215,AT4G15230,AT4G15233,AT4G15236	c0006_00467,c0006_00469	-	Bra012798,Bra012797	-
fgenesh1_pg.C_scaffold_4002609,scaffold_403381.1,fgenesh2_kg.4__2646__AT2G44570.1	AT2G44540,AT2G44550,AT2G44560,AT2G44570	c0004_00339,c0004_00340	Bra004844,Bra004845,Bra004846	-	-
fgenesh2_kg.7__2318__AT4G19850.1,fgenesh2_kg.7__2319__AT4G19840.1	AT4G19840,AT4G19850	c0006_00938,c0006_00939	Bra013428,Bra013429	-	-
fgenesh2_kg.2__311__AT1G61420.1,Al_scaffold_0002_393,Al_scaffold_0002_394,fgenesh2_kg.2__315__AT1G61380.1,Al_scaffold_0002_396,fgenesh2_kg.2__317__AT1G61360.1	AT1G61360,AT1G61370,AT1G61380,AT1G61390,AT1G61400	c0015_00381,c0015_00382,c0015_00383,c0015_00384,c0015_00385,c0015_00386,c0015_00387,c0015_00388	-	Bra031434,Bra031433	-
fgenesh1_pg.C_scaffold_3001667,scaffold_302087.1,scaffold_302089.1	AT3G17690,AT3G17700	c0005_01560,c0005_01561	Bra022235,Bra022233,Bra022232	Bra021266,Bra021265	Bra001676,Bra001678
fgenesh2_kg.4__2406__AT2G42530.1,Al_scaffold_0004_2903	AT2G42530,AT2G42540	c0004_00525,c0004_00526	-	-	Bra000263,Bra000265
fgenesh2_kg.5__1362__AT3G50120.1,Al_scaffold_0005_1866,fgenesh2_kg.5__1364__AT3G50140.1,fgenesh2_kg.5__1365__AT3G50150.1,fgenesh2_kg.5__1366__AT3G50170.1,fgenesh1_pm.C_scaffold_5001137	AT3G50120,AT3G50130,AT3G50140,AT3G50150,AT3G50160,AT3G50170,AT3G50180,AT3G50190,AT3G50200	c0007_00441,c0007_00442,c0007_00443	Bra036056,Bra036057	Bra012907,Bra012906,Bra012905,Bra012904	-
fgenesh2_kg.5__2596__AT3G61270.1,scaffold_503361.1	AT3G61270,AT3G61280,AT3G61290	c0007_01322,c0007_01323	Bra007590,Bra007591,Bra007592,Bra007593	-	-
Al_scaffold_0001_981,scaffold_101060.1	AT1G10060,AT1G10070	c0001_00747,c0001_00749	Bra019964,Bra019963	-	Bra018463,Bra018464
fgenesh2_kg.4__985__AT2G30140.2,scaffold_401499.1,fgenesh2_kg.4__986__AT2G30150.1	AT2G30140,AT2G30150	c0004_01692,c0004_01693,c0004_01694	Bra018333,Bra018334	-	-
Al_scaffold_0001_2216,scaffold_102374.1,scaffold_102375.1,fgenesh2_kg.1__2317__AT1G21270.1	AT1G21210,AT1G21230,AT1G21240,AT1G21245,AT1G21250	c0001_01648,c0001_01649	-	-	Bra016426,Bra016427,Bra016428
fgenesh2_kg.4__2558__AT2G43820.1,fgenesh2_kg.4__2560__AT2G43840.1	AT2G43820,AT2G43840	c0004_00410,c0004_00411	Bra004787,Bra004788	-	Bra000329,Bra000330
scaffold_402096.1,Al_scaffold_0004_1992	AT2G34990,AT2G35000	c0004_01249,c0004_01250	Bra005374,Bra005375	-	-
fgenesh2_kg.2__2089__AT1G77950.1,fgenesh2_kg.2__2091__AT1G77980.1	AT1G77950,AT1G77980	c0013_00454,c0013_00456	Bra015645,Bra015643	-	-
fgenesh2_kg.7__81__AT4G38820.1,fgenesh2_kg.7__83__AT4G38840.1,scaffold_700077.1	AT4G38825,AT4G38840,AT4G38850	c0017_00065,c0017_00066	Bra011891,Bra011892	-	-
fgenesh2_kg.2__1087__AT1G68380.1,fgenesh2_kg.2__1088__AT1G68390.1	AT1G68380,AT1G68390	c0012_00153,c0012_00154	Bra004302,Bra004303	-	-
fgenesh1_pm.C_scaffold_7001318,fgenesh1_pg.C_scaffold_7001381	AT4G25810,AT4G25820	c0006_01460,c0006_01461	Bra013922,Bra013923	-	-
fgenesh2_kg.4__2523__AT2G43510.1,fgenesh2_kg.4__2524__AT2G43520.1,scaffold_403245.1	AT2G43510,AT2G43520,AT2G43530	c0004_00435,c0004_00436	Bra004768,Bra004769,Bra004770	-	-
fgenesh2_kg.7__757__AT4G33600.1,fgenesh2_kg.7__758__AT4G33590.1	AT4G33590,AT4G33600	c0014_00554,c0014_00555	-	-	Bra034575,Bra034574
scaffold_704091.1,scaffold_704092.1	AT5G39520,AT5G39530	c0016_00235,c0016_00236	Bra025665,Bra025664	-	-
Al_scaffold_0007_1193,Al_scaffold_0007_1194,fgenesh2_kg.7__1263__AT4G29260.1	AT4G29260,AT4G29270	c0014_00138,c0014_00139	-	-	Bra010332,Bra010333
fgenesh2_kg.8__1668__AT5G57530.1,fgenesh2_kg.8__1669__AT5G57550.1,scaffold_802331.1	AT5G57530,AT5G57540,AT5G57550,AT5G57560	c0002_00613,c0002_00614,c0002_00615,c0002_00616,c0002_00617	Bra002723,Bra002722,Bra002720,Bra002719,Bra002718	Bra020432,Bra020433,Bra020434,Bra020436	-
fgenesh2_kg.4__1947__AT2G38750.1,fgenesh1_pg.C_scaffold_4002001	AT2G38750,AT2G38760	c0004_00872,c0004_00873,c0004_00874,c0004_00875	-	Bra017103,Bra017102	Bra000090,Bra000091
fgenesh1_pg.C_scaffold_1002524,scaffold_103154.1	AT1G28220,AT1G28230	c0001_02170,c0001_02171,c0001_02172	-	-	Bra010890,Bra010891
scaffold_502419.1,Al_scaffold_0005_2226,Al_scaffold_0005_2227	AT3G53280,AT3G53290,AT3G53300,AT3G53305	c0007_00704,c0007_00705,c0007_00706	Bra006987,Bra006988	-	-
fgenesh2_kg.1__1223__AT1G11330.1,fgenesh2_kg.1__1224__AT1G11340.1,fgenesh2_kg.1__1225__AT1G11350.1,Al_scaffold_0001_1145	AT1G11330,AT1G11340,AT1G11350	c0001_00861,c0001_00862	Bra019867,Bra019866,Bra019864,Bra019863,Bra019862	Bra031766,Bra031765,Bra031764	-
fgenesh1_pm.C_scaffold_8000804,fgenesh2_kg.8__946__AT5G50600.1	AT5G50690,AT5G50700	c0002_00014,c0002_00015	-	Bra022525,Bra022523	-
fgenesh2_kg.6__2330__AT5G23360.1,scaffold_602405.1,scaffold_602406.1	AT5G23350,AT5G23360,AT5G23370	c0003_00650,c0003_00651	Bra009672,Bra009674,Bra009675	-	Bra029370,Bra029369,Bra029368
fgenesh2_kg.1__4016__AT1G49200.1,fgenesh2_kg.1__4017__AT1G49210.1,fgenesh2_kg.1__4018__AT1G49220.1,scaffold_104562.1	AT1G49200,AT1G49210,AT1G49220,AT1G49230	c0008_00553,c0008_00554,c0008_00555	Bra018781,Bra018780,Bra018779,Bra018777	Bra014177,Bra014175,Bra014174	-
fgenesh2_kg.7__1154__AT4G30290.1,fgenesh2_kg.7__1155__AT4G30280.1,scaffold_701193.1	AT4G30270,AT4G30280,AT4G30290	c0014_00233,c0014_00234,c0014_00235	Bra011181,Bra011180,Bra011179	Bra024089,Bra024088,Bra024087	Bra010290,Bra010291,Bra010292
scaffold_701151.1,scaffold_701152.1	AT4G30650,AT4G30660	c0014_00275,c0014_00276	Bra011209,Bra011208	-	-
scaffold_700153.1,scaffold_700154.1,fgenesh1_pg.C_scaffold_7000117,fgenesh2_kg.7__161__AT4G39510.1	AT4G39480,AT4G39490,AT4G39500,AT4G39510	c0017_00126,c0017_00127,c0017_00128,c0017_00129,c0017_00130	-	Bra033626,Bra033625,Bra033624,Bra033623,Bra033622,Bra033621	Bra010675,Bra010676,Bra010678,Bra010679,Bra010680
fgenesh2_kg.1__915__AT1G08890.1,fgenesh2_kg.1__918__AT1G08900.2,fgenesh2_kg.1__920__AT1G08920.2,scaffold_100921.1	AT1G08890,AT1G08900,AT1G08920,AT1G08930	c0001_00649,c0001_00650	Bra018594,Bra018592,Bra018591	Bra031649,Bra031648	Bra030748,Bra030747
fgenesh2_kg.2__1054__AT1G67990.1,fgenesh2_kg.2__1055__AT1G67980.1	AT1G67980,AT1G67990	c0012_00109,c0012_00110,c0012_00111	-	Bra033968,Bra033967	-
fgenesh2_kg.1__3134__AT1G29770.1,fgenesh2_kg.1__3135__AT1G29780.1	AT1G29770,AT1G29780	c0001_02287,c0001_02288	-	Bra030172,Bra030171	Bra010812,Bra010813
fgenesh1_pg.C_scaffold_7001417,fgenesh2_kg.7__1722__AT4G25400.1	AT4G25400,AT4G25410	c0006_01421,c0006_01422	-	Bra019167,Bra019166	-
fgenesh1_pm.C_scaffold_7000888,fgenesh1_pg.C_scaffold_7000929,fgenesh2_kg.7__1131__AT4G30530.1	AT4G30530,AT4G30540,AT4G30550	c0014_00260,c0014_00261	-	-	Bra010282,Bra010283
fgenesh2_kg.8__2134__AT5G61550.1,fgenesh2_kg.8__2137__AT5G61560.1	AT5G61550,AT5G61560	c0003_00559,c0003_00560	Bra012944,Bra012943	-	-
fgenesh2_kg.5__1180__AT3G48270.1,fgenesh2_kg.5__1181__AT3G48280.1,scaffold_501777.1,Al_scaffold_0005_1643,fgenesh2_kg.5__1183__AT3G48310.1	AT3G48270,AT3G48280,AT3G48290,AT3G48300,AT3G48310,AT3G48320	c0007_00284,c0007_00286	-	-	Bra029897,Bra029898
fgenesh2_kg.8__1940__AT5G59880.1,fgenesh1_pm.C_scaffold_8001603	AT5G59880,AT5G59890	c0002_00826,c0002_00827	-	Bra020276,Bra020277	Bra006686,Bra006687
fgenesh2_kg.6__3565__AT4G01450.1,fgenesh2_kg.6__3566__AT4G01440.1,fgenesh2_kg.6__3568__AT4G01430.1	AT4G01430,AT4G01440,AT4G01450	c0011_00129,c0011_00130,c0011_00131,c0011_00132	-	Bra000923,Bra000925,Bra000926	Bra008545,Bra008546,Bra008548
fgenesh2_kg.1__4571__AT1G55560.1,scaffold_105351.1	AT1G55560,AT1G55570	c0008_00071,c0008_00072	-	Bra030849,Bra030850	-
fgenesh1_pg.C_scaffold_7001968,scaffold_702449.1;scaffold_702451.1,scaffold_702452.1	AT4G19570,AT4G19580,AT4G19590	c0006_00920,c0006_00921	Bra013403,Bra013404	-	Bra020958,Bra020957,Bra020956,Bra020955
fgenesh1_pm.C_scaffold_2001214,fgenesh1_pm.C_scaffold_2001215,fgenesh1_pg.C_scaffold_2001532,fgenesh1_pg.C_scaffold_2001533,scaffold_202137.1	AT1G72120,AT1G72125,AT1G72130,AT1G72140	c0012_00523,c0012_00524,c0012_00525	-	-	Bra003893,Bra003894,Bra003895,Bra003896,Bra003897,Bra003898
fgenesh2_kg.7__2743__AT4G15755.1,Al_scaffold_0007_2688;fgenesh2_kg.7__2744__AT4G15740.1,scaffold_702959.1	AT4G15740,AT4G15755	c0006_00524,c0006_00525,c0006_00526,c0006_00527,c0006_00528,c0006_00530,c0006_00531,c0006_00532	Bra033508,Bra033507,Bra033506	Bra012771,Bra012770	Bra038073,Bra038072
fgenesh2_kg.3__105__AT3G01240.1,scaffold_300108.1	AT3G01230,AT3G01240	c0005_00086,c0005_00087	Bra039134,Bra039133	-	-
scaffold_105227.1,fgenesh1_pm.C_scaffold_1003477	AT1G53830,AT1G53840	c0008_00153,c0008_00154	-	-	Bra040562,Bra040563
fgenesh1_pm.C_scaffold_5000301,Al_scaffold_0005_443,Al_scaffold_0005_444,fgenesh2_kg.5__376__AT3G26170.1,fgenesh2_kg.5__379__AT3G26190.1,fgenesh2_kg.5__380__AT3G26200.1,scaffold_500511.1,fgenesh2_kg.5__382__AT3G26220.1,scaffold_500515.1,fgenesh1_pg.C_scaffold_5000378,scaffold_500517.1,fgenesh1_pg.C_scaffold_5000380,fgenesh1_pg.C_scaffold_5000381,fgenesh2_kg.5__386__AT3G26300.1,Al_scaffold_0005_456	AT3G26150,AT3G26160,AT3G26170,AT3G26180,AT3G26190,AT3G26200,AT3G26210,AT3G26220,AT3G26230	c0003_01399,c0003_01400,c0003_01401,c0003_01402,c0003_01403,c0003_01404,c0003_01405,c0003_01406,c0003_01407,c0003_01408,c0003_01409,c0003_01410	Bra025194,Bra025193,Bra025192,Bra025191,Bra025190,Bra025189,Bra025188	-	-
scaffold_701797.1,scaffold_701798.1	AT4G25250,AT4G25260	c0006_01408,c0006_01409	Bra013878,Bra013879,Bra013880	Bra019180,Bra019179	-
fgenesh1_pm.C_scaffold_3001234,fgenesh2_kg.3__1548__AT3G14310.1	AT3G14300,AT3G14310	c0005_01240,c0005_01241	-	Bra021549,Bra021548,Bra021547	Bra001546,Bra001547
fgenesh2_kg.7__1707__AT4G25520.1,fgenesh1_pg.C_scaffold_7001406	AT4G25515,AT4G25520	c0006_01432,c0006_01433	-	Bra019159,Bra019158	-
scaffold_403255.1,fgenesh1_pg.C_scaffold_4002511,fgenesh2_kg.4__2529__AT2G43580.1,fgenesh2_kg.4__2530__AT2G43590.1,fgenesh2_kg.4__2531__AT2G43600.1,fgenesh2_kg.4__2532__AT2G43610.1,fgenesh2_kg.4__2533__AT2G43620.1	AT2G43570,AT2G43580,AT2G43590,AT2G43600,AT2G43610,AT2G43620	c0004_00426,c0004_00427,c0004_00428,c0004_00429	Bra004771,Bra004772,Bra004773	Bra037699,Bra037698	Bra000310,Bra000311,Bra000312,Bra000313,Bra000314,Bra000315
Al_scaffold_0001_457,fgenesh2_kg.1__476__AT1G05240.1,scaffold_100501.1,fgenesh2_kg.1__477__AT1G05260.1	AT1G05240,AT1G05250,AT1G05260	c0001_00358,c0001_00359,c0001_00360,c0001_00361	Bra015404,Bra015403,Bra015402	Bra032474,Bra032475,Bra032476,Bra032477	Bra030607,Bra030606
fgenesh2_kg.4__2793__AT2G45930.1,scaffold_403547.1	AT2G45930,AT2G45940	c0004_00203,c0004_00204	-	-	Bra000405,Bra000406
scaffold_400439.1,fgenesh1_pm.C_scaffold_4000292,scaffold_400444.1	AT2G24250,AT2G24255	c0009_00446,c0009_00447	-	Bra032069,Bra032068,Bra032067,Bra032066,Bra032065,Bra032064	-
scaffold_701038.1,scaffold_701039.1;scaffold_701042.1,fgenesh1_pm.C_scaffold_7000788;fgenesh2_kg.7__1007__AT4G31630.1,fgenesh1_pg.C_scaffold_7000837	AT4G31610,AT4G31615,AT4G31620,AT4G31630,AT4G31640,AT4G31650,AT4G31660,AT4G31680,AT4G31690	c0014_00366,c0014_00368,c0014_00369	Bra011289,Bra011288,Bra011287,Bra011286,Bra011285	Bra023991,Bra023990,Bra023988	-
fgenesh1_pg.C_scaffold_7001753,fgenesh1_pm.C_scaffold_7001650,fgenesh1_pg.C_scaffold_7001755	AT4G21903,AT4G21910	c0006_01102,c0006_01103,c0006_01104	-	Bra038749,Bra038748,Bra038747	Bra020863,Bra020862
fgenesh2_kg.8__1897__AT5G59480.1,scaffold_802579.1,fgenesh2_kg.8__1898__AT5G59490.1	AT5G59480,AT5G59490	c0002_00785,c0002_00786,c0002_00787	Bra002563,Bra002562	-	-
scaffold_301656.1,fgenesh2_kg.3__1537__AT3G14210.1,scaffold_301658.1,fgenesh2_kg.3__1538__AT3G14225.1	AT3G14210,AT3G14220,AT3G14225	c0005_01229,c0005_01230,c0005_01231	Bra027356,Bra027357,Bra027358,Bra027359	-	-
scaffold_100596.1,fgenesh2_kg.1__575__AT1G06090.1,Al_scaffold_0001_547	AT1G06080,AT1G06090,AT1G06100,AT1G06120	c0001_00425,c0001_00426	Bra015473,Bra015472	Bra032437,Bra032438,Bra032439	-
fgenesh2_kg.3__474__AT3G04960.3,fgenesh2_kg.3__479__AT3G04980.1	AT3G04960,AT3G04980	c0005_00368,c0005_00370	Bra039474,Bra039476,Bra039477	-	-
fgenesh2_kg.8__478__AT5G43370.1,fgenesh1_pm.C_scaffold_8000402,fgenesh2_kg.8__480__AT5G43350.1,fgenesh2_kg.8__483__AT5G43340.1	AT5G43340,AT5G43350,AT5G43360,AT5G43370	c0003_02066,c0003_02067,c0003_02068	Bra033676,Bra033675,Bra033673	Bra035976,Bra035977,Bra035978,Bra035979,Bra035981	-
fgenesh2_kg.7__102__AT4G38990.1,fgenesh1_pg.C_scaffold_7000071,scaffold_700098.1	AT4G38990,AT4G39000,AT4G39010	c0017_00079,c0017_00080,c0017_00081	Bra011882,Bra011881	Bra033592,Bra033591	-
scaffold_701315.1,fgenesh1_pm.C_scaffold_7001001	AT4G29340,AT4G29350	c0014_00142,c0014_00143	Bra011099,Bra011098	-	-
scaffold_802185.1,fgenesh2_kg.8__1546__AT5G56370.1,scaffold_802187.1;fgenesh2_kg.8__1548__AT5G56400.1,scaffold_802192.1;fgenesh2_kg.8__1549__AT5G56430.1,scaffold_802195.1	AT5G56370,AT5G56380,AT5G56390,AT5G56400,AT5G56410,AT5G56420,AT5G56430,AT5G56440,AT5G56452	c0002_00520,c0002_00521	Bra002819,Bra002817	-	Bra028923,Bra028925,Bra028926,Bra028927,Bra028928,Bra028929,Bra028930,Bra028931
fgenesh2_kg.22__5__AT1G69900.1,scaffold_2200008.1	AT1G69890,AT1G69900	c0012_00306,c0012_00307	Bra016256,Bra016255,Bra016254	Bra007887,Bra007888	-
fgenesh2_kg.1__3440__AT1G33080.1,Al_scaffold_0001_3385,scaffold_103689.1	AT1G33080,AT1G33090,AT1G33100,AT1G33110	c0001_02557,c0001_02558,c0001_02559	Bra040000,Bra040001,Bra040003	-	-
fgenesh2_kg.6__2439__AT5G24400.1,fgenesh1_pm.C_scaffold_6001954,scaffold_602537.1	AT5G24400,AT5G24410,AT5G24420	c0003_00726,c0003_00727	Bra009758,Bra009759,Bra009761	-	-
fgenesh2_kg.7__1501__AT4G27300.1,Al_scaffold_0007_1412	AT4G27290,AT4G27300	c0006_01593,c0006_01594	Bra026363,Bra026362	-	-
fgenesh2_kg.3__1571__AT3G14460.1,fgenesh2_kg.3__1572__AT3G14470.1	AT3G14460,AT3G14470	c0005_01258,c0005_01259	Bra027332,Bra027333	-	-
fgenesh2_kg.6__3187__AT4G12480.1,scaffold_603705.1,scaffold_603707.1,scaffold_603708.1,scaffold_603709.1,fgenesh2_kg.6__3188__AT4G12530.1	AT4G12470,AT4G12480,AT4G12490,AT4G12500,AT4G12510,AT4G12520,AT4G12530,AT4G12545,AT4G12550	c0011_00471,c0011_00472,c0011_00473,c0011_00474	-	Bra000775,Bra000777,Bra000778	Bra018481,Bra018483,Bra018484
scaffold_402067.1,scaffold_402068.1	AT2G34790,AT2G34810	c0004_01267,c0004_01268	Bra005390,Bra005392	-	-
fgenesh2_kg.3__652__AT3G06460.1,fgenesh2_kg.3__653__AT3G06470.1	AT3G06460,AT3G06470	c0005_00520,c0005_00521	-	Bra040273,Bra040272	-
Al_scaffold_0001_2100,fgenesh2_kg.1__2200__AT1G20160.2	AT1G20150,AT1G20160	c0001_01563,c0001_01564	Bra025796,Bra025798	Bra012217,Bra012215	-
fgenesh2_kg.4__2121__AT2G40150.1,fgenesh2_kg.4__2122__AT2G40160.1	AT2G40150,AT2G40160	c0004_00740,c0004_00741	-	-	Bra000171,Bra000172
fgenesh2_kg.1__1363__AT1G12610.1,fgenesh1_pm.C_scaffold_1001063	AT1G12610,AT1G12630	c0001_00972,c0001_00974	-	-	Bra016761,Bra016763
fgenesh2_kg.7__2299__AT4G20050.1,fgenesh2_kg.7__2301__AT4G20040.1,scaffold_702391.1	AT4G20040,AT4G20050	c0006_00954,c0006_00955	Bra013441,Bra013442	-	-
fgenesh2_kg.4__2260__AT2G41290.1,fgenesh1_pm.C_scaffold_4001873	AT2G41290,AT2G41300	c0004_00632,c0004_00633	Bra004613,Bra004614	-	Bra000222,Bra000223
fgenesh2_kg.3__1581__AT3G14610.1,scaffold_301702.1,fgenesh2_kg.3__1583__AT3G14660.1	AT3G14610,AT3G14620,AT3G14630,AT3G14640,AT3G14650,AT3G14660,AT3G14680,AT3G14690	c0005_01270,c0005_01271,c0005_01272,c0005_01273	Bra027319,Bra027320,Bra027321,Bra027322,Bra027323,Bra027324	Bra021572,Bra021570	Bra001560,Bra001561,Bra001562,Bra001563,Bra001564
scaffold_304006.1,scaffold_304008.1;scaffold_304011.1,scaffold_304012.1	AT2G17070,AT2G17080	c0010_00017,c0010_00018,c0010_00019,c0010_00020,c0010_00021	Bra002020,Bra002019	Bra013032,Bra013031	-
fgenesh2_kg.6__1563__AT5G15840.1,fgenesh2_kg.6__1566__AT5G15850.1	AT5G15840,AT5G15850	c0002_01430,c0002_01431	Bra008668,Bra008669	-	-
fgenesh1_pm.C_scaffold_4001347,fgenesh2_kg.4__1610__AT2G35780.1	AT2G35770,AT2G35780	c0004_01174,c0004_01175	-	Bra017294,Bra017293	-
scaffold_502629.1,fgenesh2_kg.5__1923__AT3G55100.1,fgenesh2_kg.5__1924__AT3G55110.1,scaffold_502633.1	AT3G55090,AT3G55100,AT3G55110,AT3G55130	c0007_00856,c0007_00857,c0007_00858,c0007_00860	-	Bra014773,Bra014774,Bra014775,Bra014776	-
fgenesh2_kg.1__1460__AT1G13470.1,scaffold_101509.1,Al_scaffold_0001_1393,fgenesh2_kg.1__1464__AT1G13480.1,fgenesh1_pm.C_scaffold_1001140,fgenesh2_kg.1__1467__AT1G13540.1	AT1G13470,AT1G13480,AT1G13490,AT1G13500,AT1G13510,AT1G13520,AT1G13530,AT1G13540,AT1G13550	c0001_01042,c0001_01043	-	Bra026900,Bra026901,Bra026902	Bra016727,Bra016728
fgenesh2_kg.2__872__AT1G66400.1,scaffold_201361.1	AT1G66400,AT1G66410	c0021_00168,c0021_00170	Bra004165,Bra004166	-	-
fgenesh2_kg.4__2761__AT2G45650.1,scaffold_403512.1	AT2G45650,AT2G45660	c0004_00234,c0004_00235	Bra004927,Bra004928	-	Bra000392,Bra000393
scaffold_302386.1,scaffold_302387.1,fgenesh2_kg.3__2232__AT3G20080.1,fgenesh2_kg.3__2233__AT3G20140.1	AT3G20090,AT3G20100,AT3G20110,AT3G20120,AT3G20130,AT3G20140	c0005_01792,c0005_01793,c0005_01794,c0005_01795	Bra035812,Bra035813,Bra035814	-	-
fgenesh2_kg.1__2448__AT1G22540.1,fgenesh2_kg.1__2449__AT1G22550.1,Al_scaffold_0001_2367	AT1G22540,AT1G22550,AT1G22570	c0001_01769,c0001_01770,c0001_01771	Bra024520,Bra024519	-	-
scaffold_700766.1,fgenesh2_kg.7__728__AT4G33840.1,fgenesh2_kg.7__729__AT4G33830.1,fgenesh1_pg.C_scaffold_7000622,fgenesh1_pg.C_scaffold_7000623	AT4G33810,AT4G33820,AT4G33830,AT4G33840,AT4G33860	c0014_00579,c0014_00580,c0014_00581	-	Bra017609,Bra017610	Bra034586,Bra034585,Bra034584
fgenesh2_kg.8__1115__AT5G52300.1,scaffold_801674.1	AT5G52300,AT5G52310	c0002_00180,c0002_00182	-	Bra022585,Bra022584	-
fgenesh2_kg.3__2118__AT3G19000.1,fgenesh2_kg.3__2119__AT3G19010.1	AT3G19000,AT3G19010	c0005_01686,c0005_01687	Bra022378,Bra022377	-	-
scaffold_801909.1,scaffold_801911.1	AT5G53990,AT5G54010	c0002_00318,c0002_00319,c0002_00320,c0002_00321	-	Bra022689,Bra022688	Bra029045,Bra029046,Bra029047,Bra029049
Al_scaffold_0006_612,Al_scaffold_0006_614	AT5G06900,AT5G06905	c0002_02127,c0002_02128	-	-	Bra028715,Bra028714
fgenesh2_kg.2__904__AT1G66760.2,scaffold_201452.1	AT1G66760,AT1G66780	c0021_00191,c0021_00192,c0021_00193,c0021_00194	Bra004187,Bra004188	-	-
Al_scaffold_0005_440,fgenesh1_pm.C_scaffold_5000300	AT3G26130,AT3G26140	c0003_01411,c0003_01412	Bra025187,Bra025186	-	-
Al_scaffold_0002_1280,fgenesh1_pg.C_scaffold_2001001	AT1G66690,AT1G66700,AT1G66720	c0021_00183,c0021_00184,c0021_00186,c0021_00187,c0021_00188	Bra004183,Bra004184	-	-
fgenesh2_kg.2__854__AT1G66210.1,fgenesh2_kg.2__855__AT1G66220.1	AT1G66210,AT1G66220	c0021_00148,c0021_00149	Bra004153,Bra004154	-	-
fgenesh2_kg.4__2470__AT2G43090.1,fgenesh2_kg.4__2471__AT2G43100.1	AT2G43090,AT2G43100	c0004_00469,c0004_00470	Bra004743,Bra004744	-	-
Al_scaffold_0007_2564,scaffold_702824.1	AT4G16540,AT4G16550,AT4G16560	c0006_00624,c0006_00628	Bra038485,Bra038484	Bra012708,Bra012707,Bra012705,Bra012704	-
fgenesh1_pm.C_scaffold_7001132,fgenesh1_pg.C_scaffold_7001183	AT4G27860,AT4G27870	c0014_00001,c0014_00002,c0014_00003	Bra026304,Bra026303,Bra026302	Bra019021,Bra019020	-
Al_scaffold_0003_1661,scaffold_301865.1	AT3G15950,AT3G15960	c0005_01409,c0005_01410,c0005_01411	-	Bra021149,Bra021148	-
fgenesh2_kg.2__1340__AT1G70790.2,fgenesh1_pm.C_scaffold_2001102,fgenesh1_pm.C_scaffold_2001103	AT1G70790,AT1G70800,AT1G70810	c0012_00404,c0012_00405	Bra016186,Bra016185	-	Bra003940,Bra003941
fgenesh2_kg.22__7__AT1G69870.1,fgenesh1_pm.C_scaffold_22000009	AT1G69850,AT1G69860,AT1G69870	c0012_00302,c0012_00303,c0012_00304	Bra016260,Bra016259	-	-
Al_scaffold_0001_1756,scaffold_101888.1	AT1G17010,AT1G17020	c0001_01319,c0001_01320	-	Bra026693,Bra026695	-
Al_scaffold_0002_473,fgenesh2_kg.2__388__AT1G60730.1,fgenesh2_kg.2__390__AT1G60710.1,scaffold_200544.1,scaffold_200545.1,fgenesh2_kg.2__392__AT1G60680.1	AT1G60730,AT1G60750	c0015_00286,c0015_00287,c0015_00288,c0015_00290	Bra027134,Bra027135	Bra031486,Bra031485	-
scaffold_402370.1,fgenesh2_kg.4__1784__AT2G37320.1	AT2G37310,AT2G37320	c0004_01020,c0004_01021	-	Bra017196,Bra017195	-
scaffold_802891.1,scaffold_802892.1,fgenesh2_kg.8__2228__AT5G62350.1,fgenesh2_kg.8__2229__AT5G62360.1	AT5G62340,AT5G62350,AT5G62360	c0003_00488,c0003_00489	Bra010075,Bra010076	-	-
fgenesh2_kg.6__1607__AT5G16230.1,scaffold_601661.1	AT5G16230,AT5G16240	c0002_01399,c0002_01400	Bra008631,Bra008632	-	-
fgenesh2_kg.6__3175__AT4G12370.1,Al_scaffold_0006_3449	AT4G12370,AT4G12382	c0011_00484,c0011_00486,c0011_00487,c0011_00488	-	Bra000770,Bra000771	-
fgenesh2_kg.1__3217__AT1G30400.2,fgenesh1_pm.C_scaffold_1002459,scaffold_103378.1	AT1G30400,AT1G30410,AT1G30420	c0001_02340,c0001_02341	Bra032386,Bra032385	-	-
Al_scaffold_0004_3226,fgenesh2_kg.4__2737__AT2G45420.1	AT2G45410,AT2G45420	c0004_00256,c0004_00257	Bra004908,Bra004910	Bra040312,Bra040311	-
fgenesh1_pm.C_scaffold_3000864,fgenesh2_kg.3__1083__AT3G10490.2,fgenesh2_kg.3__1085__AT3G10500.1	AT3G10480,AT3G10490,AT3G10500	c0005_00848,c0005_00849,c0005_00850	-	Bra034120,Bra034119,Bra034118	Bra001365,Bra001366
fgenesh2_kg.5__2469__AT3G60120.1,fgenesh2_kg.5__2471__AT3G60130.1,fgenesh2_kg.5__2473__AT3G60140.1	AT3G60120,AT3G60130,AT3G60140	c0007_01233,c0007_01234,c0007_01235	Bra007507,Bra007508,Bra007509,Bra007510	Bra014510,Bra014511	-
scaffold_302360.1,fgenesh1_pm.C_scaffold_3001761	AT3G19930,AT3G19940	c0005_01775,c0005_01776	-	Bra038245,Bra038243,Bra038244,Bra038242	-
fgenesh2_kg.2__206__AT1G62770.1,scaffold_200280.1	AT1G62760,AT1G62770	c0026_00188,c0026_00189	Bra027019,Bra027020	-	-
fgenesh2_kg.8__2384__AT5G63800.1,scaffold_803077.1	AT5G63800,AT5G63810	c0003_00369,c0003_00370	Bra024237,Bra024238	-	-
scaffold_601864.1,fgenesh2_kg.6__1802__AT5G18060.1	AT5G18010,AT5G18020,AT5G18030	c0002_01248,c0002_01250,c0002_01251,c0002_01252	-	Bra006430,Bra006431,Bra006432,Bra006433,Bra006434,Bra006435,Bra006436,Bra006438	-
Al_scaffold_0006_3185,fgenesh1_pg.C_scaffold_6002718	AT4G10490,AT4G10500	c0028_00144,c0028_00146	-	Bra000712,Bra000713	-
scaffold_103419.1,scaffold_103420.1,scaffold_103421.1,fgenesh2_kg.1__3258__AT1G30730.1,scaffold_103423.1	AT1G30700,AT1G30710,AT1G30720,AT1G30730,AT1G30740	c0001_02372,c0001_02373,c0001_02374,c0001_02375	Bra023127,Bra023126,Bra023124,Bra023123,Bra023122	Bra014886,Bra014885	-
scaffold_302595.1,fgenesh2_kg.3__2402__AT3G21760.1	AT3G21750,AT3G21760	c0005_01959,c0005_01960,c0005_01962,c0005_01963,c0005_01964	Bra031307,Bra031306,Bra031304,Bra031303	-	Bra001845,Bra001846,Bra001847
scaffold_101915.1,scaffold_101917.1	AT1G17230,AT1G17240	c0001_01340,c0001_01341	Bra025988,Bra025987	-	-
fgenesh2_kg.3__1795__AT3G16410.1,scaffold_301922.1,scaffold_301923.1,fgenesh2_kg.3__1798__AT3G16420.1,scaffold_301926.1,fgenesh2_kg.3__1802__AT3G16440.1,fgenesh2_kg.3__1803__AT3G16450.3,fgenesh2_kg.3__1806__AT3G16460.1,fgenesh2_kg.3__1808__AT3G16470.2	AT3G16390,AT3G16400,AT3G16410,AT3G16420,AT3G16430	c0005_01454,c0005_01456	-	-	Bra001631,Bra001632
Al_scaffold_0003_1358,fgenesh1_pg.C_scaffold_3001212	AT3G13290,AT3G13300	c0005_01127,c0005_01128	Bra034692,Bra034693	-	-
scaffold_400464.1,fgenesh2_kg.4__353__AT2G24370.1	AT2G24360,AT2G24370	c0009_00431,c0009_00432	Bra007857,Bra007859,Bra007860	Bra032102,Bra032100	-
scaffold_700645.1,scaffold_700646.1,scaffold_700647.1,fgenesh2_kg.7__611__AT4G34770.1	AT4G34770,AT4G34790,AT4G34800,AT4G34810	c0014_00677,c0014_00678,c0014_00679,c0014_00680	Bra011564,Bra011563,Bra011562,Bra011561	-	Bra034656,Bra034655,Bra034653
fgenesh2_kg.1__4299__AT1G52290.1,fgenesh2_kg.1__4300__AT1G52310.1	AT1G52290,AT1G52310	c0008_00294,c0008_00296	-	Bra014322,Bra014321	-
fgenesh2_kg.5__2132__AT3G56970.1,fgenesh1_pm.C_scaffold_5001751	AT3G56970,AT3G56980	c0007_01000,c0007_01001	Bra007289,Bra007290	Bra014657,Bra014658,Bra014659	Bra003260,Bra003261
fgenesh2_kg.7__176__AT4G39640.1,Al_scaffold_0007_171	AT4G39640,AT4G39650	c0017_00141,c0017_00142	Bra011846,Bra011844	Bra033632,Bra033631	-
Al_scaffold_0003_2526,scaffold_302835.1	AT3G23460,AT3G23470,AT3G23480,AT3G23510,AT3G23530	c0005_02101,c0005_02102	Bra014951,Bra014950	Bra023722,Bra023723	-
Al_scaffold_0001_1470,fgenesh2_kg.1__1540__AT1G14240.2	AT1G14230,AT1G14240,AT1G14250	c0001_01097,c0001_01098,c0001_01099	Bra019670,Bra019669	-	-
fgenesh2_kg.1__3123__AT1G29660.1,fgenesh2_kg.1__3124__AT1G29670.1	AT1G29660,AT1G29670	c0001_02276,c0001_02277	-	Bra030156,Bra030155	Bra010820,Bra010821
fgenesh2_kg.1__1729__AT1G15770.1,fgenesh2_kg.1__1730__AT1G15780.1,scaffold_101766.1	AT1G15770,AT1G15780,AT1G15790	c0001_01227,c0001_01228	Bra026108,Bra026106,Bra026105,Bra026104,Bra026103,Bra026102	Bra026748,Bra026749	-
fgenesh2_kg.1__1874__AT1G17170.1,Al_scaffold_0001_1778,fgenesh2_kg.1__1876__AT1G17190.1	AT1G17170,AT1G17180,AT1G17190	c0001_01334,c0001_01335,c0001_01336	Bra025995,Bra025994,Bra025993	Bra026679,Bra026680,Bra026681	-
fgenesh2_kg.3__876__AT3G08720.1,fgenesh2_kg.3__877__AT3G08730.1	AT3G08720,AT3G08730	c0005_00691,c0005_00693	Bra029713,Bra029712	Bra040057,Bra040056	-
fgenesh2_kg.8__2213__AT5G62200.1,Al_scaffold_0008_2727	AT5G62200,AT5G62210	c0003_00499,c0003_00500	-	-	Bra029274,Bra029272
fgenesh1_pm.C_scaffold_1001035,scaffold_101347.1	AT1G12280,AT1G12290	c0079_00007,c0079_00008	Bra019755,Bra019754,Bra019753,Bra019752,Bra019751	Bra026977,Bra026978,Bra026979	Bra016781,Bra016782
fgenesh1_pg.C_scaffold_8001972,scaffold_802599.1	AT5G59650,AT5G59660,AT5G59670,AT5G59680	c0002_00804,c0002_00806	-	-	Bra006700,Bra006701
scaffold_200335.1,fgenesh1_pg.C_scaffold_2000255	AT1G62262,AT1G62280	c0026_00236,c0026_00237	Bra027058,Bra027059	-	-
scaffold_202857.1,fgenesh2_kg.2__2176__AT1G78830.1,scaffold_202859.1	AT1G78820,AT1G78830,AT1G78850,AT1G78860	c0013_00532,c0013_00533	-	-	Bra003635,Bra003636
scaffold_202138.1,fgenesh1_pm.C_scaffold_2001219	AT1G72150,AT1G72160	c0012_00526,c0012_00527	-	Bra008012,Bra008013	Bra003891,Bra003892
scaffold_104666.1,scaffold_104667.1	AT1G49640,AT1G49650,AT1G49660	c0008_00509,c0008_00510,c0008_00513	Bra018809,Bra018808,Bra018807	-	-
fgenesh2_kg.3__1697__AT3G15500.1,fgenesh2_kg.3__1698__AT3G15510.1	AT3G15500,AT3G15510	c0005_01358,c0005_01359	Bra027237,Bra027238	Bra021114,Bra021113	Bra001596,Bra001597
fgenesh2_kg.5__1305__AT3G49570.1,fgenesh2_kg.5__1306__AT3G49580.1	AT3G49570,AT3G49580	c0007_00397,c0007_00398	Bra017974,Bra017975	-	-
fgenesh2_kg.8__1192__AT5G53090.1,scaffold_801777.1	AT5G53090,AT5G53100	c0002_00243,c0002_00244	-	Bra022628,Bra022629	-
fgenesh2_kg.4__920__AT2G29440.1,fgenesh2_kg.4__921__AT2G29450.1,fgenesh1_pm.C_scaffold_4000770,scaffold_401408.1,fgenesh2_kg.4__923__AT2G29470.1,scaffold_401410.1,fgenesh2_kg.4__924__AT2G29490.1,fgenesh1_pm.C_scaffold_4000776	AT2G29460,AT2G29470,AT2G29480,AT2G29490	c0004_01742,c0004_01743,c0004_01744,c0004_01745	Bra018385,Bra018386	-	-
Al_scaffold_0006_2700,fgenesh1_pm.C_scaffold_6002188	AT5G27350,AT5G27360	c0003_00945,c0003_00946	-	-	Bra020595,Bra020593,Bra020592
scaffold_202468.1,fgenesh2_kg.2__1801__AT1G75280.1,fgenesh2_kg.2__1802__AT1G75290.1,fgenesh1_pm.C_scaffold_2001494	AT1G75280,AT1G75290,AT1G75300	c0013_00186,c0013_00188	Bra015854,Bra015853	-	-
fgenesh2_kg.5__1269__AT3G49190.1,scaffold_501899.1,fgenesh2_kg.5__1271__AT3G49210.1	AT3G49190,AT3G49200,AT3G49210	c0007_00363,c0007_00364,c0007_00365	-	-	Bra029938,Bra029939
fgenesh1_pm.C_scaffold_7002541,Al_scaffold_0007_3393	AT5G37810,AT5G37820	c0016_00410,c0016_00412	-	-	Bra025437,Bra025436,Bra025435
fgenesh2_kg.1__3004__AT1G28360.1,fgenesh2_kg.1__3005__AT1G28370.1	AT1G28360,AT1G28370	c0001_02189,c0001_02190,c0001_02191	Bra032901,Bra032900,Bra032898	Bra030095,Bra030094	Bra010880,Bra010881
fgenesh2_kg.3__2344__AT3G21230.1,Al_scaffold_0003_2273	AT3G21230,AT3G21240	c0005_01905,c0005_01906,c0005_01907,c0005_01908	Bra031266,Bra031265,Bra031263,Bra031262	-	Bra001819,Bra001820
scaffold_103051.1,fgenesh2_kg.1__2893__AT1G27370.2	AT1G27360,AT1G27370	c0001_02100,c0001_02101	Bra032823,Bra032822	Bra030041,Bra030040	-
fgenesh1_pg.C_scaffold_3001269,fgenesh2_kg.3__1482__AT3G13790.1	AT3G13784,AT3G13790	c0005_01179,c0005_01180	Bra027397,Bra027398	-	-
fgenesh2_kg.3__2158__AT3G19390.1,fgenesh1_pm.C_scaffold_3001711	AT3G19390,AT3G19400	c0005_01722,c0005_01723,c0005_01724	Bra022419,Bra022418	Bra038208,Bra038207,Bra038206	-
scaffold_700116.1,scaffold_700117.1	AT4G39170,AT4G39180	c0017_00099,c0017_00100	-	-	Bra010699,Bra010700
fgenesh1_pg.C_scaffold_3001346,Al_scaffold_0003_1514	AT3G14520,AT3G14540	c0005_01260,c0005_01261,c0005_01262	-	Bra021566,Bra021564,Bra021563	-
fgenesh1_pg.C_scaffold_4002386,Al_scaffold_0004_2887,fgenesh1_pg.C_scaffold_4002387,Al_scaffold_0004_2889,Al_scaffold_0004_2890,fgenesh1_pm.C_scaffold_4001984,fgenesh1_pm.C_scaffold_4001985,scaffold_403116.1,Al_scaffold_0004_2896,scaffold_403119.1	AT2G42460,AT2G42470,AT2G42480	c0004_00531,c0004_00532	Bra004695,Bra004696,Bra004697,Bra004698,Bra004699,Bra004700,Bra004701,Bra004702	Bra016875,Bra016874,Bra016873,Bra016872	Bra000258,Bra000259
fgenesh2_kg.3__2537__AT3G23220.1,fgenesh2_kg.3__2538__AT3G23230.1,scaffold_302806.1	AT3G23220,AT3G23230,AT3G23240	c0005_02076,c0005_02077,c0005_02078	Bra014925,Bra014924	Bra023744,Bra023745,Bra023746,Bra023748	-
fgenesh2_kg.22__1__AT1G69930.1,scaffold_2200004.1	AT1G69920,AT1G69930	c0012_00309,c0012_00310,c0012_00311	Bra016253,Bra016252,Bra016250	Bra007889,Bra007890	-
fgenesh2_kg.4__2605__AT2G44210.2,scaffold_403339.1,fgenesh1_pm.C_scaffold_4002147,scaffold_403342.1	AT2G44210,AT2G44220,AT2G44240,AT2G44250	c0004_00373,c0004_00374	Bra004815,Bra004816,Bra004818,Bra004819,Bra004820,Bra004821	-	Bra000347,Bra000348
fgenesh2_kg.2__1919__AT1G76360.1,Al_scaffold_0002_2338	AT1G76360,AT1G76370	c0013_00293,c0013_00294	Bra015757,Bra015756	-	Bra003723,Bra003724
fgenesh1_pm.C_scaffold_6002549,Al_scaffold_0006_3402	AT4G12010,AT4G12020	c0011_00511,c0011_00512	-	Bra000758,Bra000759	-
scaffold_100381.1,fgenesh2_kg.1__355__AT1G04250.1	AT1G04240,AT1G04250	c0001_00266,c0001_00267	Bra015298,Bra015297	Bra032520,Bra032521	-
fgenesh2_kg.4__2010__AT2G39310.1,fgenesh2_kg.4__2013__AT2G39330.1	AT2G39310,AT2G39330	c0004_00823,c0004_00824	-	Bra017083,Bra017082	-
fgenesh1_pm.C_scaffold_2001547,fgenesh1_pm.C_scaffold_2001548,fgenesh2_kg.2__1874__AT1G75920.1,fgenesh1_pm.C_scaffold_2001550	AT1G75880,AT1G75890,AT1G75900,AT1G75910,AT1G75920,AT1G75930	c0041_00006,c0041_00007,c0041_00008,c0041_00009	Bra015804,Bra015803,Bra015802	-	Bra003736,Bra003737
Al_scaffold_0006_1698,fgenesh2_kg.6__1786__AT5G17860.1	AT5G17850,AT5G17860	c0002_01261,c0002_01262	Bra002112,Bra002110	-	Bra023640,Bra023641,Bra023643
scaffold_403506.1,fgenesh2_kg.4__2757__AT2G45610.1	AT2G45600,AT2G45610	c0004_00239,c0004_00240	Bra004924,Bra004925	-	-
fgenesh2_kg.8__216__AT5G45820.1,fgenesh2_kg.8__217__AT5G45810.1	AT5G45810,AT5G45820	c0003_01830,c0003_01831	Bra025051,Bra025052	-	-
fgenesh2_kg.4__196__AT2G22750.1,fgenesh2_kg.4__197__AT2G22760.1,fgenesh2_kg.4__198__AT2G22770.1	AT2G22750,AT2G22760,AT2G22770	c0027_00175,c0027_00176,c0027_00178	Bra039927,Bra039926,Bra039924	Bra030210,Bra030208,Bra030207	-
Al_scaffold_0001_4740,scaffold_105127.1,fgenesh2_kg.1__4381__AT1G53080.1	AT1G53060,AT1G53070,AT1G53080	c0008_00216,c0008_00217	Bra019014,Bra019013,Bra019012	-	-
fgenesh2_kg.1__1415__AT1G13080.1,fgenesh2_kg.1__1416__AT1G13100.1,fgenesh1_pg.C_scaffold_1001177,fgenesh2_kg.1__1418__AT1G13110.1	AT1G13080,AT1G13090,AT1G13100,AT1G13110	c0001_01010,c0001_01011,c0001_01012	Bra019809,Bra019808	Bra026933,Bra026934,Bra026936,Bra026937	Bra016740,Bra016741,Bra016743
fgenesh2_kg.8__1868__AT5G59040.1,fgenesh2_kg.8__1869__AT5G59030.1	AT5G59030,AT5G59040	c0002_00763,c0002_00764	-	Bra020328,Bra020329	Bra006724,Bra006725
Al_scaffold_0006_268,Al_scaffold_0006_270,fgenesh2_kg.6__274__AT5G03610.1	AT5G03590,AT5G03600,AT5G03610	c0002_02412,c0002_02413,c0002_02414	-	-	Bra028826,Bra028825
Al_scaffold_0002_2117,scaffold_202357.1	AT1G74090,AT1G74100	c0013_00076,c0013_00077	Bra015938,Bra015936,Bra015935	-	Bra003817,Bra003818,Bra003819
fgenesh2_kg.4__1718__AT2G36750.1,scaffold_402300.1,fgenesh2_kg.4__1720__AT2G36800.1	AT2G36750,AT2G36760,AT2G36770,AT2G36780,AT2G36790,AT2G36800	c0004_01075,c0004_01076,c0004_01077,c0004_01078	Bra005241,Bra005242,Bra005243,Bra005244,Bra005245,Bra005246	Bra017225,Bra017224	Bra023079,Bra023080,Bra023081
fgenesh2_kg.6__3407__AT4G02860.1,fgenesh1_pm.C_scaffold_6002736	AT4G02850,AT4G02860	c0011_00267,c0011_00268	-	Bra000858,Bra000859	-
scaffold_301502.1,fgenesh2_kg.3__1393__AT3G13160.1	AT3G13150,AT3G13160	c0176_00001,c0176_00002	-	Bra039372,Bra039373	-
fgenesh2_kg.7__349__AT4G37050.1,fgenesh2_kg.7__350__AT4G37070.2	AT4G37050,AT4G37060,AT4G37070	c0017_00296,c0017_00297	Bra011732,Bra011731,Bra011730	Bra017798,Bra017799	-
fgenesh2_kg.3__48__AT3G01680.1,fgenesh2_kg.3__49__AT3G01670.1	AT3G01670,AT3G01680	c0005_00036,c0005_00037	Bra040546,Bra040547	-	-
Al_scaffold_0002_2642,Al_scaffold_0002_2643,Al_scaffold_0002_2644,fgenesh1_pg.C_scaffold_2002185,scaffold_202914.1	AT1G79310,AT1G79320,AT1G79330,AT1G79340	c0013_00582,c0013_00583,c0013_00584	Bra035106,Bra035107,Bra035108,Bra035109	-	-
fgenesh2_kg.6__1329__AT5G13740.1,fgenesh2_kg.6__1330__AT5G13750.1	AT5G13740,AT5G13750	c0002_01608,c0002_01609	-	Bra006212,Bra006213	-
scaffold_700679.1,fgenesh2_kg.7__640__AT4G34510.1	AT4G34510,AT4G34520	c0014_00653,c0014_00654	-	-	Bra034635,Bra034634
scaffold_700730.1,fgenesh2_kg.7__693__AT4G34135.1,Al_scaffold_0007_652	AT4G34131,AT4G34135,AT4G34138	c0014_00610,c0014_00611,c0014_00612	Bra011496,Bra011497,Bra011495,Bra011493,Bra011492	-	Bra034610,Bra034609,Bra034608
fgenesh2_kg.6__635__AT5G06860.1,fgenesh2_kg.6__636__AT5G06870.1	AT5G06860,AT5G06870	c0002_02129,c0002_02130	-	Bra005916,Bra005917,Bra005918,Bra005919	-
fgenesh2_kg.1__1537__AT1G14210.1,fgenesh1_pm.C_scaffold_1001201	AT1G14210,AT1G14220	c0001_01095,c0001_01096	-	Bra026846,Bra026847	-
fgenesh2_kg.5__276__AT2G03750.1,fgenesh2_kg.5__277__AT2G03760.1,scaffold_500364.1	AT2G03750,AT2G03760,AT2G03770	c0003_01478,c0003_01479,c0003_01480	-	Bra026540,Bra026539	Bra017373,Bra017372,Bra017371,Bra017370,Bra017369,Bra017368
Al_scaffold_0002_340,fgenesh2_kg.2__277__AT1G61820.1,fgenesh2_kg.2__278__AT1G61810.1	AT1G61810,AT1G61820	c0015_00423,c0015_00424,c0015_00425	-	Bra031392,Bra028384,Bra028383	-
fgenesh2_kg.4__2388__AT2G42350.1,fgenesh2_kg.4__2389__AT2G42360.1	AT2G42350,AT2G42360	c0004_00539,c0004_00540	Bra004685,Bra004686,Bra004687	Bra016881,Bra016880	-
fgenesh2_kg.6__804__AT5G08370.1,fgenesh2_kg.6__806__AT5G08380.1	AT5G08370,AT5G08380	c0002_02001,c0002_02002	-	-	Bra028661,Bra028660
Al_scaffold_0002_1975,Al_scaffold_0002_1976,Al_scaffold_0002_1977,scaffold_202214.1	AT1G72840,AT1G72850,AT1G72860,AT1G72870	c0012_00592,c0012_00593,c0012_00595,c0012_00596	-	Bra008053,Bra008055,Bra008056	-
Al_scaffold_0001_957,fgenesh1_pg.C_scaffold_1000836,scaffold_101035.1	AT1G09880,AT1G09890,AT1G09910	c0056_00018,c0056_00020,c0056_00021	Bra019979,Bra019978,Bra019976	-	-
fgenesh2_kg.2__216__AT1G62620.1,fgenesh2_kg.2__218__AT1G62600.1,fgenesh2_kg.2__221__AT1G62580.1,scaffold_200299.1,fgenesh2_kg.2__222__AT1G62560.1,fgenesh1_pm.C_scaffold_2000176	AT1G62600,AT1G62620	c0026_00202,c0026_00205,c0026_00206	Bra027032,Bra027033,Bra027035	-	-
Al_scaffold_0008_1566,scaffold_801631.1,fgenesh2_kg.8__1079__AT5G51950.1	AT5G51930,AT5G51950	c0002_00144,c0002_00145,c0002_00146	-	Bra022571,Bra022570	Bra029151,Bra029152
fgenesh1_pm.C_scaffold_1001745,fgenesh2_kg.1__2232__AT1G20510.1	AT1G20480,AT1G20490,AT1G20500,AT1G20510	c0001_01588,c0001_01589,c0001_01590,c0001_01591	Bra025822,Bra025823	Bra012233,Bra012232	Bra016463,Bra016464,Bra016465,Bra016466
scaffold_202766.1,fgenesh1_pm.C_scaffold_2001745	AT1G77990,AT1G78000	c0013_00457,c0013_00458	Bra015642,Bra015641	-	-
fgenesh2_kg.8__1818__AT5G58770.1,fgenesh2_kg.8__1819__AT5G58782.1,scaffold_802484.1	AT5G58770,AT5G58780,AT5G58782,AT5G58784	c0002_00721,c0002_00722	Bra002619,Bra002618	Bra020353,Bra020354	-
scaffold_803114.1,scaffold_803115.1,fgenesh2_kg.8__2424__AT5G64120.1	AT5G64100,AT5G64110,AT5G64120	c0003_00339,c0003_00340	Bra024267,Bra024268,Bra024269	-	Bra031934,Bra031933
fgenesh1_pm.C_scaffold_8001049,Al_scaffold_0008_1745	AT5G53510,AT5G53520	c0002_00281,c0002_00282	-	-	Bra029064,Bra029065
fgenesh2_kg.8__190__AT5G46050.1,Al_scaffold_0008_225	AT5G46040,AT5G46050	c0003_01813,c0003_01814	-	Bra022012,Bra022013	-
fgenesh2_kg.2__2323__AT1G80560.1,scaffold_203010.1	AT1G80555,AT1G80560	c0013_00664,c0013_00665	-	Bra008463,Bra008464,Bra008466	-
fgenesh2_kg.4__1767__AT2G37170.1,scaffold_402354.1	AT2G37170,AT2G37180	c0004_01036,c0004_01037	Bra005215,Bra005216	-	Bra023102,Bra023103
Al_scaffold_0004_324,Al_scaffold_0004_325,fgenesh2_kg.4__285__AT2G23580.1,fgenesh2_kg.4__286__AT2G23600.1,fgenesh1_pm.C_scaffold_4000235,fgenesh2_kg.4__289__AT2G23620.1	AT2G23550,AT2G23560,AT2G23570,AT2G23580,AT2G23590,AT2G23600,AT2G23610,AT2G23620	c0009_00510,c0009_00511,c0009_00512	-	Bra032161,Bra032160,Bra032158,Bra032157	-
fgenesh1_pm.C_scaffold_7002228,scaffold_703062.1;Al_scaffold_0007_2789,Al_scaffold_0007_2791	AT4G15050,AT4G15053,AT4G15056	c0006_00446,c0006_00447	Bra039570,Bra039571	-	-
scaffold_702968.1,fgenesh2_kg.7__2750__AT4G15700.1,scaffold_702970.1,fgenesh2_kg.7__2751__AT4G15680.1,fgenesh2_kg.7__2752__AT4G15670.1,scaffold_702973.1	AT4G15660,AT4G15670,AT4G15680,AT4G15690,AT4G15700	c0006_00517,c0006_00518,c0006_00519,c0006_00520,c0006_00521	Bra033504,Bra033503,Bra033501	-	Bra038076,Bra038075
Al_scaffold_0001_1125,fgenesh2_kg.1__1211__AT1G11220.1,scaffold_101214.1	AT1G11210,AT1G11220,AT1G11230	c0001_00851,c0001_00852	Bra019875,Bra019874	-	-
scaffold_502945.1,scaffold_502946.1,scaffold_502947.1,fgenesh2_kg.5__2215__AT3G57730.1,Al_scaffold_0005_2689;fgenesh2_kg.5__2216__AT3G57740.1,fgenesh2_kg.5__2217__AT3G57750.2,fgenesh2_kg.5__2219__AT3G57760.1	AT3G57700,AT3G57710,AT3G57720,AT3G57730,AT3G57740,AT3G57750,AT3G57760,AT3G57770	c0007_01061,c0007_01062	Bra007350,Bra007351,Bra007352,Bra007353,Bra007355,Bra007356,Bra007357	Bra014606,Bra014607,Bra014608,Bra014609	Bra003298,Bra003299
Al_scaffold_0007_1748,scaffold_701935.1,fgenesh2_kg.7__1896__AT4G24000.1,fgenesh1_pm.C_scaffold_7001487	AT4G23990,AT4G24000,AT4G24010	c0006_01281,c0006_01283,c0006_01284	Bra013749,Bra013750	-	-
scaffold_603529.1,fgenesh2_kg.6__3099__AT4G11320.1	AT4G11310,AT4G11320	c0011_00568,c0011_00569	-	-	Bra033146,Bra033148
scaffold_102807.1,scaffold_102808.1,scaffold_102809.1,fgenesh2_kg.1__2653__AT1G27020.1	AT1G27020,AT1G27030	c0001_01932,c0001_01933,c0001_01934	-	Bra012433,Bra012432	-
fgenesh2_kg.3__1015__AT3G09900.1,fgenesh2_kg.3__1016__AT3G09910.1	AT3G09900,AT3G09910	c0005_00798,c0005_00799	Bra029804,Bra029803	-	-
scaffold_600755.1,fgenesh2_kg.6__721__AT5G07520.1,scaffold_600758.1,scaffold_600759.1	AT5G07510,AT5G07520,AT5G07530,AT5G07540	c0002_02069,c0002_02070	-	Bra005943,Bra005944	-
scaffold_700778.1,fgenesh2_kg.7__741__AT4G33720.1,fgenesh2_kg.7__742__AT4G33710.1	AT4G33710,AT4G33720,AT4G33730	c0014_00569,c0014_00570,c0014_00571,c0014_00572	Bra011465,Bra011464	Bra036988,Bra036987,Bra036986,Bra036984	-
scaffold_502860.1,scaffold_502861.1,scaffold_502862.1	AT3G57010,AT3G57020,AT3G57030	c0007_01004,c0007_01005,c0007_01006	Bra007293,Bra007294	-	-
fgenesh2_kg.4__1108__AT2G31210.1,scaffold_401648.1,fgenesh2_kg.4__1109__AT2G31220.1	AT2G31210,AT2G31215,AT2G31220	c0004_01598,c0004_01599	Bra018269,Bra018270	Bra021710,Bra021711	-
fgenesh2_kg.4__4__AT2G20950.1,fgenesh2_kg.4__8__AT2G20960.1	AT2G20950,AT2G20960	c0027_00014,c0027_00015	Bra031153,Bra031152	Bra000586,Bra000587	-
Al_scaffold_0008_116,fgenesh1_pm.C_scaffold_8000075;scaffold_800125.1,scaffold_800126.1,fgenesh2_kg.8__100__AT5G46940.1,scaffold_800128.1	AT5G46930,AT5G46940,AT5G46950,AT5G46960,AT5G46970,AT5G46980,AT5G46990	c0003_01736,c0003_01738,c0003_01739,c0003_01740,c0003_01741,c0003_01742	Bra024973,Bra024974,Bra024975	Bra022087,Bra022088	-
scaffold_503575.1,scaffold_503577.1,fgenesh2_kg.5__2794__AT3G62960.1	AT3G62930,AT3G62950,AT3G62960	c0007_01460,c0007_01462	-	Bra014379,Bra014380,Bra014382	-
fgenesh2_kg.3__670__AT3G06620.1,Al_scaffold_0003_671,fgenesh2_kg.3__673__AT3G06640.1	AT3G06620,AT3G06630,AT3G06640	c0005_00536,c0005_00537,c0005_00538	Bra029594,Bra029593	Bra040282,Bra040281	-
fgenesh2_kg.8__1433__AT5G55320.1,fgenesh2_kg.8__1434__AT5G55330.1,fgenesh2_kg.8__1435__AT5G55340.1,fgenesh2_kg.8__1436__AT5G55350.1,fgenesh2_kg.8__1437__AT5G55380.1	AT5G55320,AT5G55330,AT5G55340,AT5G55350,AT5G55360,AT5G55370,AT5G55380	c0002_00429,c0002_00430,c0002_00431,c0002_00432,c0002_00433	Bra002911,Bra002910,Bra002909	-	Bra028984,Bra028985
scaffold_402457.1,fgenesh2_kg.4__1843__AT2G37770.2	AT2G37760,AT2G37770,AT2G37790	c0004_00970,c0004_00972,c0004_00973,c0004_00974	Bra005158,Bra005159,Bra005161,Bra005162,Bra005163	-	Bra000018,Bra000019
scaffold_700269.1,fgenesh2_kg.7__250__AT4G37980.1,fgenesh2_kg.7__252__AT4G37970.1	AT4G37970,AT4G37980,AT4G37990	c0017_00203,c0017_00204,c0017_00205	Bra011799,Bra011798	-	Bra010625,Bra010626,Bra010627
fgenesh2_kg.4__19__AT2G21100.1,fgenesh2_kg.4__20__AT2G21110.1	AT2G21100,AT2G21110	c0027_00025,c0027_00026	Bra031162,Bra031161	-	-
fgenesh2_kg.1__2303__AT1G21110.1,fgenesh2_kg.1__2306__AT1G21130.1	AT1G21100,AT1G21110,AT1G21120,AT1G21130	c0001_01641,c0001_01642	Bra025874,Bra025875,Bra025876	Bra012270,Bra012269,Bra012268	Bra016432,Bra016433
fgenesh2_kg.3__2286__AT3G20590.1,scaffold_302458.1,fgenesh2_kg.3__2288__AT3G20610.1	AT3G20590,AT3G20600,AT3G20610	c0005_01842,c0005_01844,c0005_01845,c0005_01846	Bra035766,Bra035767	-	-
Al_scaffold_0006_155,fgenesh2_kg.6__163__AT5G02500.1	AT5G02490,AT5G02500	c0002_02490,c0002_02491	Bra009583,Bra009584	-	-
scaffold_202800.1,fgenesh2_kg.2__2131__AT1G78340.1,fgenesh1_pm.C_scaffold_2001774	AT1G78320,AT1G78340	c0013_00489,c0013_00490,c0013_00491,c0013_00492	Bra035029,Bra035031	-	-
Al_scaffold_0004_69,fgenesh2_kg.4__81__AT2G21540.1	AT2G21520,AT2G21540	c0027_00068,c0027_00070	-	Bra030295,Bra030294	-

## Sheet: colinearity in Br,At,Tp
genes in A. thaliana	genes in LF of B. rapa	genes in MF1 of B. rapa	genes in MF2 of B. rapa	genes in T. parvula
AT1G01010	Bra033296	-	-	c0001_00108
AT1G01020	Bra033295	-	-	c0001_00107
AT1G01030	Bra033294	-	-	c0001_00106
AT1G01040	Bra033293	-	-	c0001_00105
AT1G01050	Bra033292	Bra032616	-	c0001_00104
AT1G01070	Bra033290	Bra032617	-	c0001_00101
AT1G01080	Bra033287	-	-	c0001_00100
AT1G01090	Bra033286	Bra032619	-	c0001_00099
AT1G01100	Bra033285	Bra032620	-	c0001_00098
AT1G01110	Bra033284	-	-	c0001_00097
AT1G01120	Bra033283	Bra032621	-	c0001_00096
AT1G01140	Bra033282	Bra032622	-	c0001_00095
AT1G01160	Bra033281	Bra032623	-	c0001_00094
AT1G01170	Bra033280	-	-	c0001_00093
AT1G01180	Bra033279	-	-	c0001_00092
AT1G01190	Bra033278	Bra032624	-	c0001_00091
AT1G01200	Bra033277	-	-	c0001_00090
AT1G01210	-	Bra032625	-	c0001_00089
AT1G01220	-	Bra032626	-	c0001_00088
AT1G01250	Bra033274	Bra032630	-	c0001_00087
AT1G01260	Bra033273	-	-	c0001_00086
AT1G01290	-	Bra032632	-	c0001_00085
AT1G01300	Bra033271	-	-	c0001_00084
AT1G01310	Bra033270	Bra032633	-	c0001_00083
AT1G01320	Bra033269	-	-	c0001_00082
AT1G01360	Bra033267	-	-	c0001_00079
AT1G01370	-	Bra032634	-	c0001_00078
AT1G01380	-	Bra032635	-	c0001_00077
AT1G01420	Bra033266	-	-	c0001_00075
AT1G01440	Bra033264	-	-	c0001_00074
AT1G01453	Bra033263	-	-	c0001_00073
AT1G01460	Bra033262	-	-	c0001_00072
AT1G01470	-	-	Bra030494	c0001_00071
AT1G01480	Bra033261	-	-	c0001_00070
AT1G01490	Bra033260	Bra032637	-	c0001_00069
AT1G01500	Bra033259	Bra032638	-	c0001_00068
AT1G01510	Bra033258	-	-	c0001_00067
AT1G01540	Bra037952	Bra032639	-	c0001_00066
AT1G01550	Bra033254	-	-	c0001_00065
AT1G01570	Bra033253	-	-	c0001_00063
AT1G01580	Bra037953	Bra032640	-	c0001_00061
AT1G01600	Bra033251	Bra032642	-	c0001_00060
AT1G01610	Bra033249	Bra032643	-	c0001_00059
AT1G01620	Bra033248	Bra032644	-	c0001_00058
AT1G01630	Bra033247	Bra032645	-	c0001_00057
AT1G01640	Bra033246	-	-	c0001_00056
AT1G01650	Bra033245	Bra032646	-	c0001_00055
AT1G01660	Bra033244	-	-	c0001_00052
AT1G01690	Bra033241	-	-	c0001_00051
AT1G01710	Bra033240	-	-	c0001_00050
AT1G01720	Bra033239	Bra032615	-	c0001_00049
AT1G01730	-	Bra032648	-	c0001_00048
AT1G01740	Bra033237	-	-	c0001_00047
AT1G01750	Bra033236	-	-	c0001_00046
AT1G01760	Bra033235	-	-	c0001_00045
AT1G01770	-	Bra032649	-	c0001_00044
AT1G01780	Bra033233	Bra032650	-	c0001_00043
AT1G01790	Bra033232	Bra032651	-	c0001_00041
AT1G01800	Bra033230	Bra032573	-	c0001_00040
AT1G01830	Bra033229	-	-	c0001_00037
AT1G01840	Bra033227	-	-	c0001_00036
AT1G01880	-	Bra032653	-	c0001_00035
AT1G01900	Bra033226	-	-	c0001_00034
AT1G01910	-	Bra032654	-	c0001_00032
AT1G01920	-	Bra032655	-	c0001_00031
AT1G01930	-	Bra032656	-	c0001_00030
AT1G01940	-	Bra032657	-	c0001_00029
AT1G01950	-	Bra032658	-	c0001_00028
AT1G01960	-	Bra032659	-	c0001_00027
AT1G01970	Bra033224	-	-	c0001_00026
AT1G01990	Bra033223	-	-	c0001_00024
AT1G02010	-	Bra032660	-	c0001_00023
AT1G02040	Bra033220	Bra032661	-	c0001_00021
AT1G02065	Bra033221	Bra032662	-	c0001_00018
AT1G02070	-	Bra032663	-	c0001_00017
AT1G02080	Bra033222	Bra032664	-	c0001_00016
AT1G02090	Bra033219	Bra032666	-	c0001_00014
AT1G02140	Bra033217	Bra032668	-	c0001_00009
AT1G02150	Bra033215	-	-	c0001_00008
AT1G02180	Bra033213	-	-	c0001_00006
AT1G02190	-	Bra032670	-	c0001_00004
AT1G02220	Bra033308	-	-	c0154_00017
AT1G02260	-	Bra032614	-	c0154_00016
AT1G02270	Bra033309	Bra032613	-	c0154_00015
AT1G02280	Bra033311	Bra032612	-	c0154_00013
AT1G02300	-	-	Bra030498	c0154_00011
AT1G02310	Bra033312	-	-	c0154_00009
AT1G02330	Bra033313	-	-	c0154_00007
AT1G02335	Bra033314	-	-	c0154_00006
AT1G02340	Bra033315	Bra032610	-	c0154_00005
AT1G02370	Bra033321	-	-	c0154_00003
AT1G02380	-	Bra032607	-	c0001_00121
AT1G02390	Bra033323	-	-	c0001_00122
AT1G02400	Bra033324	-	Bra030500	c0001_00123
AT1G02410	Bra033325	Bra032603	Bra030501	c0001_00125
AT1G02420	-	-	Bra030502	c0001_00126
AT1G02450	-	Bra032601	-	c0001_00127
AT1G02460	Bra033328	Bra032600	-	c0001_00128
AT1G02470	Bra033330	Bra032599	-	c0001_00129
AT1G02520	Bra033331	-	Bra030503	c0001_00132
AT1G02560	Bra033332	-	Bra030504	c0001_00134
AT1G02570	Bra033333	-	-	c0001_00135
AT1G02580	Bra033334	Bra032592	-	c0001_00136
AT1G02610	Bra033335	-	Bra030505	c0001_00137
AT1G02630	Bra033336	-	Bra030506	c0001_00139
AT1G02640	Bra033337	-	-	c0001_00140
AT1G02660	-	Bra032591	Bra030507	c0001_00141
AT1G02680	Bra033338	-	Bra030508	c0001_00142
AT1G02720	-	Bra032589	-	c0001_00146
AT1G02730	Bra033344	-	-	c0001_00147
AT1G02750	Bra033345	Bra032587	-	c0001_00148
AT1G02780	Bra033346	Bra032586	Bra030509	c0001_00149
AT1G02790	Bra033347	Bra032585	Bra030510	c0001_00151
AT1G02800	-	Bra032584	-	c0001_00152
AT1G02813	Bra033349	Bra032583	-	c0001_00153
AT1G02820	Bra033350	-	-	c0001_00154
AT1G02830	Bra033351	Bra032582	-	c0001_00155
AT1G02860	Bra033353	-	-	c0001_00157
AT1G02870	Bra033354	-	-	c0001_00159
AT1G02890	Bra033356	Bra032579	-	c0001_00161
AT1G02900	Bra033357	-	Bra030513	c0001_00162
AT1G02910	-	-	Bra030514	c0001_00163
AT1G02920	Bra033361	Bra032578	Bra030515	c0001_00164
AT1G02970	-	Bra032577	Bra030517	c0001_00166
AT1G02980	Bra033363	Bra032576	-	c0001_00167
AT1G02990	-	Bra032575	-	c0001_00168
AT1G03000	Bra033364	Bra032565	-	c0001_00169
AT1G03010	Bra033365	Bra032571	-	c0001_00170
AT1G03020	Bra033366	Bra032563	-	c0001_00171
AT1G03030	Bra033367	-	-	c0001_00172
AT1G03040	Bra033368	-	-	c0001_00173
AT1G03050	Bra033369	Bra032561	Bra030518	c0001_00174
AT1G03055	-	Bra032560	-	c0001_00175
AT1G03060	Bra033370	Bra032559	-	c0001_00176
AT1G03070	Bra033373	-	-	c0001_00177
AT1G03080	-	Bra032558	-	c0001_00178
AT1G03090	-	Bra032557	-	c0001_00179
AT1G03110	Bra033374	Bra032523	Bra030519	c0001_00182
AT1G03120	Bra033375	-	-	c0001_00183
AT1G03140	-	Bra032556	Bra030520	c0001_00186
AT1G03160	-	-	Bra030522	c0001_00187
AT1G03170	Bra033378	-	Bra030523	c0001_00188
AT1G03190	-	-	Bra030524	c0070_00023
AT1G03220	-	Bra032555	Bra030526	c0070_00021
AT1G03250	Bra033380	-	-	c0070_00020
AT1G03260	-	Bra032553	-	c0070_00019
AT1G03270	Bra033381	Bra032552	-	c0070_00018
AT1G03290	Bra033382	-	-	c0070_00016
AT1G03310	Bra033388	-	Bra030528	c0070_00015
AT1G03320	Bra033389	-	-	c0070_00014
AT1G03330	-	-	Bra030529	c0070_00013
AT1G03340	Bra033390	-	-	c0070_00012
AT1G03350	Bra033391	-	Bra030530	c0070_00010
AT1G03360	Bra033392	-	Bra030531	c0070_00009
AT1G03370	Bra033393	-	-	c0070_00008
AT1G03380	Bra033394	-	-	c0070_00007
AT1G03390	Bra033395	-	-	c0070_00006
AT1G03430	Bra033398	-	-	c0070_00005
AT1G03440	Bra033399	-	Bra030532	c0070_00004
AT1G03457	Bra033400	-	-	c0070_00003
AT1G03470	Bra033401	Bra032551	-	c0070_00002
AT1G03475	Bra033402	Bra032550	-	c0070_00001
AT1G03520	Bra033408	-	-	c0001_00211
AT1G03540	Bra033410	-	Bra030534	c0001_00215
AT1G03550	Bra033409	Bra032549	Bra030535	c0001_00214
AT1G03590	Bra033411	-	Bra030536	c0001_00216
AT1G03600	Bra033412	-	Bra030537	c0001_00217
AT1G03610	Bra033413	-	Bra030538	c0001_00218
AT1G03620	Bra033414	-	Bra030539	c0001_00219
AT1G03630	Bra033415	-	Bra030540	c0001_00220
AT1G03650	-	Bra032548	-	c0001_00221
AT1G03680	-	Bra032547	-	c0001_00222
AT1G03700	Bra015256	-	-	c0001_00223
AT1G03730	-	Bra032545	-	c0001_00224
AT1G03740	Bra015260	-	-	c0001_00225
AT1G03750	-	Bra032544	-	c0001_00226
AT1G03760	Bra015261	-	Bra030541	c0001_00227
AT1G03770	Bra015262	-	-	c0001_00228
AT1G03780	Bra015263	Bra032542	-	c0001_00229
AT1G03790	Bra015264	-	Bra030542	c0001_00230
AT1G03810	Bra015268	-	-	c0001_00231
AT1G03820	Bra015269	-	Bra030543	c0001_00232
AT1G03830	-	-	Bra030544	c0001_00233
AT1G03850	Bra015272	Bra032540	Bra030545	c0001_00234
AT1G03860	Bra015273	Bra032539	Bra030546	c0001_00235
AT1G03870	Bra015274	-	-	c0001_00236
AT1G03880	Bra015275	Bra032538	-	c0001_00237
AT1G03900	Bra015277	-	Bra030548	c0811_00002
AT1G03920	Bra015279	-	-	c0001_00240
AT1G03930	-	Bra032536	-	c0001_00241
AT1G03950	Bra015280	-	Bra030552	c0001_00242
AT1G03980	-	Bra032535	-	c0001_00243
AT1G03982	Bra015282	-	-	c0001_00244
AT1G03990	Bra015283	-	-	c0001_00245
AT1G04000	Bra015284	Bra032534	-	c0001_00246
AT1G04010	Bra015285	Bra032533	-	c0001_00247
AT1G04020	-	Bra032532	-	c0001_00248
AT1G04040	-	Bra032531	Bra030553	c0001_00250
AT1G04070	Bra015286	-	-	c0001_00251
AT1G04080	Bra015287	Bra032516	Bra030554	c0001_00252
AT1G04090	Bra015288	-	-	c0001_00253
AT1G04110	Bra015290	-	-	c0001_00254
AT1G04120	Bra015291	-	-	c0001_00255
AT1G04130	-	Bra032529	-	c0001_00256
AT1G04140	-	Bra032528	Bra030555	c0001_00257
AT1G04150	-	Bra032527	-	c0001_00258
AT1G04160	-	Bra032526	-	c0001_00259
AT1G04170	Bra015292	Bra032525	Bra030556	c0001_00260
AT1G04180	Bra015293	Bra032524	-	c0001_00261
AT1G04190	-	-	Bra030557	c0001_00262
AT1G04200	Bra015294	-	Bra030558	c0001_00263
AT1G04210	Bra015295	Bra032522	-	c0001_00264
AT1G04220	Bra015296	-	Bra030559	c0001_00265
AT1G04240	Bra015298	Bra032520	Bra030560	c0001_00266
AT1G04260	-	-	Bra030561	c0001_00268
AT1G04270	Bra015299	Bra032519	-	c0001_00269
AT1G04310	Bra015303	-	-	c0001_00271
AT1G04330	Bra015304	Bra032517	-	c0001_00272
AT1G04340	Bra015305	-	Bra030565	c0001_00273
AT1G04350	Bra015307	Bra032515	-	c0001_00274
AT1G04360	Bra015308	Bra032514	-	c0057_00028
AT1G04370	Bra015310	Bra032512	-	c0057_00027
AT1G04380	Bra015311	-	Bra030567	c0057_00025
AT1G04390	Bra015312	-	-	c0057_00024
AT1G04400	Bra015313	-	Bra030568	c0057_00023
AT1G04410	Bra015314	-	Bra030569	c0057_00022
AT1G04420	Bra015315	-	-	c0057_00021
AT1G04430	Bra015316	-	Bra030570	c0057_00020
AT1G04440	Bra015317	-	-	c0057_00019
AT1G04445	-	Bra032509	Bra030571	c0057_00018
AT1G04450	-	Bra032508	Bra030572	c0057_00017
AT1G04470	Bra015318	Bra032507	-	c0057_00015
AT1G04480	Bra015319	Bra032506	Bra030573	c0057_00014
AT1G04490	Bra015320	-	-	c0057_00013
AT1G04500	Bra015321	-	Bra030574	c0057_00012
AT1G04510	Bra015322	-	Bra030575	c0057_00011
AT1G04520	Bra015323	-	-	c0057_00010
AT1G04530	Bra015324	-	-	c0057_00009
AT1G04540	Bra015325	Bra032504	-	c0057_00008
AT1G04550	Bra015326	Bra032503	-	c0057_00007
AT1G04555	Bra015327	-	-	c0057_00006
AT1G04560	Bra015328	Bra032502	-	c0057_00005
AT1G04570	Bra015329	-	-	c0057_00004
AT1G04580	Bra015330	-	-	c0057_00003
AT1G04590	Bra015331	Bra032501	-	c0057_00002
AT1G04600	-	-	Bra030576	c0057_00001
AT1G04610	Bra015334	Bra032499	-	c0586_00003
AT1G04620	Bra015335	-	-	c0001_00304
AT1G04630	Bra015336	Bra032498	Bra030577	c0001_00305
AT1G04640	Bra015337	-	Bra030580	c0001_00307
AT1G04650	Bra015338	-	Bra030581	c0001_00308
AT1G04660	-	Bra032496	Bra030582	c0001_00309
AT1G04670	Bra015340	Bra032495	-	c0001_00310
AT1G04680	Bra015341	Bra032494	Bra030583	c0001_00311
AT1G04690	Bra015342	-	Bra030584	c0001_00312
AT1G04710	-	-	Bra030586	c0001_00314
AT1G04730	Bra015344	-	Bra030587	c0001_00315
AT1G04750	Bra015345	Bra032493	Bra030588	c0001_00316
AT1G04770	Bra015346	-	Bra030589	c0001_00318
AT1G04780	Bra015348	-	Bra030590	c0001_00320
AT1G04790	Bra015349	-	-	c0001_00321
AT1G04830	Bra015351	-	Bra030591	c0001_00324
AT1G04840	Bra015357	-	-	c0001_00325
AT1G04850	-	-	Bra030592	c0001_00326
AT1G04860	-	Bra032492	Bra030593	c0001_00327
AT1G04880	Bra015358	Bra032491	Bra030594	c0001_00328
AT1G04890	Bra015360	-	-	c0001_00329
AT1G04900	Bra015362	-	-	c0001_00330
AT1G04910	Bra015363	Bra032487	-	c0092_00021
AT1G04920	Bra015364	-	-	c0092_00020
AT1G04930	Bra015366	-	-	c0092_00019
AT1G04940	Bra015367	-	-	c0092_00018
AT1G04945	-	-	Bra030597	c0092_00017
AT1G04950	Bra015368	-	Bra030598	c0092_00016
AT1G04960	Bra015369	-	-	c0092_00015
AT1G04970	Bra015371	-	-	c0092_00013
AT1G04980	Bra015375	-	-	c0092_00012
AT1G04985	-	-	Bra030599	c0092_00011
AT1G04990	Bra015377	-	-	c0092_00010
AT1G05000	Bra015379	-	-	c0092_00009
AT1G05010	Bra015380	-	-	c0092_00008
AT1G05020	Bra015381	-	Bra030600	c0092_00007
AT1G05040	Bra015383	-	-	c0092_00006
AT1G05055	-	-	Bra030602	c0092_00005
AT1G05070	Bra015386	-	-	c0092_00002
AT1G05090	Bra015387	-	Bra030603	c0092_00001
AT1G05100	Bra015388	-	-	c0001_00348
AT1G05120	Bra015389	-	Bra030604	c0001_00349
AT1G05140	Bra015391	-	-	c0145_00015
AT1G05150	Bra015393	-	-	c0145_00014
AT1G05160	Bra015394	-	-	c0145_00013
AT1G05170	Bra015395	-	-	c0145_00012
AT1G05180	Bra015396	Bra032482	-	c0001_00354
AT1G05190	Bra015397	Bra032481	-	c0145_00010
AT1G05200	Bra015398	Bra032480	-	c0001_00355
AT1G05205	Bra015399	Bra032479	-	c0145_00008
AT1G05210	Bra015400	-	Bra030605	c0001_00356
AT1G05230	Bra015401	Bra032478	-	c0001_00357
AT1G05240	Bra015404	Bra032474	Bra030607	c0001_00358
AT1G05270	Bra015405	Bra032473	Bra030608	c0145_00001
AT1G05280	Bra015411	Bra032472	Bra030610	c0001_00362
AT1G05300	Bra015415	-	-	c0001_00364
AT1G05310	Bra015416	Bra032469	-	c0001_00366
AT1G05320	Bra015417	Bra032468	-	c0001_00367
AT1G05330	Bra015418	-	-	c0001_00368
AT1G05350	Bra015420	Bra032467	-	c0001_00370
AT1G05360	-	Bra032466	-	c0001_00371
AT1G05370	Bra015421	Bra032465	-	c0001_00372
AT1G05410	Bra015422	-	-	c0001_00377
AT1G05420	-	Bra032464	-	c0001_00376
AT1G05430	Bra015423	-	-	c0001_00378
AT1G05440	Bra015424	Bra032463	-	c0001_00379
AT1G05460	Bra015427	-	-	c0001_00382
AT1G05470	Bra015428	-	Bra030611	c0001_00383
AT1G05490	Bra015430	-	-	c0001_00384
AT1G05500	Bra015431	-	Bra030612	c0001_00386
AT1G05510	Bra015432	-	-	c0001_00387
AT1G05520	-	-	Bra030613	c0001_00388
AT1G05560	Bra015435	-	-	c0001_00389
AT1G05570	Bra015436	-	-	c0001_00390
AT1G05577	Bra015441	Bra032461	-	c0001_00391
AT1G05580	Bra015442	-	-	c0001_00392
AT1G05610	Bra015444	-	-	c0001_00394
AT1G05620	-	Bra032458	Bra030616	c0001_00395
AT1G05630	Bra015445	Bra032456	Bra030617	c0001_00396
AT1G05670	Bra015447	-	Bra030620	c0074_00020
AT1G05690	-	-	Bra030621	c0074_00018
AT1G05700	Bra015449	-	Bra030596	c0074_00017
AT1G05710	Bra015450	-	-	c0074_00016
AT1G05720	-	Bra032455	Bra030623	c0074_00015
AT1G05730	-	Bra032454	-	c0074_00014
AT1G05750	-	-	Bra030624	c0074_00013
AT1G05760	Bra015451	-	-	c0074_00012
AT1G05790	Bra015453	-	Bra030625	c0001_00405
AT1G05800	Bra015454	-	-	c0074_00010
AT1G05805	Bra015456	-	-	c0074_00009
AT1G05810	-	Bra032453	-	c0074_00008
AT1G05820	-	-	Bra030626	c0074_00007
AT1G05835	-	-	Bra030627	c0074_00005
AT1G05840	-	Bra032452	-	c0074_00004
AT1G05850	Bra015457	-	Bra030628	c0074_00003
AT1G05860	Bra015458	-	Bra030629	c0001_00409
AT1G05870	Bra015459	Bra032451	-	c0001_00410
AT1G05920	Bra015465	-	-	c0001_00412
AT1G05950	-	Bra032446	-	c0001_00413
AT1G05960	Bra015466	Bra032445	Bra030631	c0001_00415
AT1G05970	Bra015467	-	-	c0001_00416
AT1G05990	-	Bra032444	Bra030632	c0001_00417
AT1G06010	-	Bra032443	Bra030633	c0001_00419
AT1G06020	Bra015468	Bra032442	Bra030634	c0001_00420
AT1G06040	Bra015469	Bra032441	Bra030635	c0001_00421
AT1G06050	Bra015470	-	-	c0001_00422
AT1G06060	-	-	Bra030636	c0001_00423
AT1G06070	Bra015471	-	Bra030637	c0001_00424
AT1G06080	Bra015473	Bra032437	Bra030638	c0001_00425
AT1G06130	-	Bra032436	-	c0001_00427
AT1G06140	Bra015476	Bra032434	-	c0001_00429
AT1G06160	Bra015478	Bra032433	-	c0001_00432
AT1G06170	Bra015480	-	-	c0001_00433
AT1G06180	Bra015481	-	-	c0001_00434
AT1G06190	Bra015482	-	-	c0001_00435
AT1G06210	Bra015484	Bra032432	Bra030641	c0001_00436
AT1G06220	-	-	Bra030642	c0001_00437
AT1G06230	Bra015485	Bra032431	Bra030643	c0001_00439
AT1G06260	Bra015487	-	Bra030646	c0001_00441
AT1G06270	Bra015488	-	-	c0001_00442
AT1G06280	-	Bra032430	Bra030647	c0001_00443
AT1G06290	Bra015494	-	-	c0001_00444
AT1G06320	-	Bra032429	Bra030648	c0001_00445
AT1G06330	-	Bra032428	-	c0001_00446
AT1G06340	-	Bra032427	-	c0001_00447
AT1G06350	Bra015493	-	Bra030650	c0001_00448
AT1G06380	-	Bra032426	-	c0001_00449
AT1G06400	-	Bra032424	-	c0001_00450
AT1G06410	Bra015497	-	Bra030651	c0001_00451
AT1G06420	Bra015498	Bra032423	-	c0001_00452
AT1G06430	Bra015499	-	Bra030652	c0001_00453
AT1G06440	Bra015500	-	-	c0001_00454
AT1G06450	-	Bra032421	-	c0001_00455
AT1G06460	Bra015501	-	Bra030653	c0001_00456
AT1G06470	Bra015502	-	Bra030654	c0001_00457
AT1G06475	Bra015503	-	-	c0001_00458
AT1G06490	Bra015504	Bra032416	-	c0001_00459
AT1G06510	Bra015506	-	-	c0001_00460
AT1G06520	Bra015507	-	-	c0001_00461
AT1G06530	Bra015508	-	-	c0001_00462
AT1G06540	Bra015509	-	-	c0001_00463
AT1G06550	-	-	Bra030657	c0001_00464
AT1G06560	Bra015510	-	Bra030658	c0001_00465
AT1G06570	Bra015511	Bra032415	-	c0001_00466
AT1G06590	Bra015512	Bra032414	-	c0001_00467
AT1G06620	Bra015515	Bra032413	-	c0001_00468
AT1G06660	Bra015516	-	Bra030659	c0001_00469
AT1G06680	Bra015520	Bra031534	Bra030660	c0001_00471
AT1G06690	-	-	Bra030661	c0001_00472
AT1G06730	Bra015523	-	-	c0001_00474
AT1G06760	Bra015524	-	-	c0001_00476
AT1G06770	Bra015526	-	-	c0001_00477
AT1G06780	Bra015529	Bra031537	-	c0001_00479
AT1G06790	-	Bra031538	Bra030662	c0001_00481
AT1G06800	Bra015531	-	-	c0001_00482
AT1G06820	-	Bra031539	-	c0001_00483
AT1G06830	Bra015532	Bra031540	-	c0001_00484
AT1G06840	Bra015533	-	-	c0001_00485
AT1G06850	-	Bra031541	Bra030663	c0001_00486
AT1G06870	Bra015534	Bra031542	-	c0001_00487
AT1G06910	-	Bra031545	-	c0001_00489
AT1G06920	-	Bra031546	-	c0001_00507
AT1G06930	Bra015537	-	-	c0001_00491
AT1G06950	Bra015538	-	Bra030666	c0001_00492
AT1G06970	-	Bra031548	Bra030667	c0001_00493
AT1G06980	Bra015540	Bra031549	Bra030668	c0001_00494
AT1G06990	Bra015542	Bra031550	-	c0001_00495
AT1G07000	Bra015543	-	-	c0001_00497
AT1G07010	Bra015544	-	-	c0001_00498
AT1G07060	Bra015549	-	-	c0001_00501
AT1G07080	Bra015550	Bra031551	Bra030670	c0001_00502
AT1G07090	Bra015551	Bra031552	-	c0001_00503
AT1G07110	Bra015552	Bra031553	-	c0001_00504
AT1G07120	-	-	Bra030671	c0001_00508
AT1G07130	-	-	Bra030672	c0001_00509
AT1G07150	Bra015556	-	-	c0001_00512
AT1G07160	Bra015496	-	-	c0001_00513
AT1G07170	Bra015559	-	-	c0001_00514
AT1G07180	Bra015560	-	Bra030676	c0001_00515
AT1G07200	Bra015561	Bra031556	-	c0001_00516
AT1G07210	Bra015562	Bra031557	-	c0001_00517
AT1G07220	Bra015563	Bra031558	-	c0001_00518
AT1G07230	Bra015564	-	-	c0001_00519
AT1G07240	Bra015568	Bra031559	-	c0001_00520
AT1G07280	Bra015570	Bra031567	-	c0001_00523
AT1G07290	Bra015571	Bra031568	-	c0136_00012
AT1G07300	Bra015572	Bra031569	-	c0001_00525
AT1G07310	Bra015573	Bra031570	-	c0136_00010
AT1G07320	Bra015574	-	-	c0001_00526
AT1G07340	Bra015575	-	Bra030678	c0001_00527
AT1G07350	Bra015576	-	-	c0136_00007
AT1G07360	-	-	Bra030679	c0001_00528
AT1G07370	-	Bra031571	-	c0001_00529
AT1G07380	Bra015577	-	Bra030680	c0001_00530
AT1G07390	-	Bra031572	-	c0001_00531
AT1G07410	Bra015578	Bra031573	-	c0001_00532
AT1G07430	Bra015579	Bra031574	-	c0001_00533
AT1G07440	Bra015580	Bra031575	Bra030683	c0001_00534
AT1G07460	-	Bra031576	Bra030682	c0001_00535
AT1G07470	-	-	Bra030684	c0001_00536
AT1G07473	Bra015581	-	Bra030685	c0001_00537
AT1G07510	-	Bra031579	-	c0001_00540
AT1G07520	Bra015584	Bra031581	Bra030688	c0001_00541
AT1G07540	Bra015585	-	Bra030689	c0001_00543
AT1G07550	Bra015587	Bra031585	Bra030691	c0001_00550
AT1G07590	-	Bra031586	-	c0001_00547
AT1G07615	-	Bra031587	Bra030693	c0001_00548
AT1G07640	-	Bra031588	Bra030696	c0001_00549
AT1G07645	Bra018692	Bra031589	-	c0001_00551
AT1G07660	Bra018691	-	-	c0001_00552
AT1G07670	Bra018690	Bra031583	-	c0001_00553
AT1G07705	-	-	Bra030703	c0001_00560
AT1G07710	Bra018683	-	-	c0001_00559
AT1G07720	Bra018684	-	Bra030702	c0001_00558
AT1G07725	Bra018685	-	-	c0001_00557
AT1G07770	Bra018689	Bra031590	Bra030697	c0001_00555
AT1G07830	Bra018681	Bra031595	-	c0331_00008
AT1G07840	Bra018680	-	-	c0331_00007
AT1G07850	Bra018679	-	-	c0331_00006
AT1G07870	Bra018678	Bra031596	Bra030705	c0001_00563
AT1G07880	-	Bra031597	-	c0001_00564
AT1G07890	Bra018677	Bra031598	Bra030706	c0001_00565
AT1G07900	Bra018675	Bra031599	-	c0331_00001
AT1G07910	Bra018674	Bra031600	-	c0001_00566
AT1G07920	Bra018669	Bra031602	Bra030707	c0001_00567
AT1G07980	Bra018668	Bra031606	-	c0001_00568
AT1G07985	Bra018667	-	-	c0001_00569
AT1G07990	Bra018666	Bra031607	Bra030708	c0001_00570
AT1G08000	Bra018665	Bra031608	Bra030709	c0001_00571
AT1G08030	Bra018664	-	Bra030710	c0001_00572
AT1G08050	Bra018663	-	Bra030712	c0001_00574
AT1G08060	Bra018662	Bra031609	-	c0001_00575
AT1G08070	Bra018658	-	-	c0001_00576
AT1G08110	Bra018654	-	-	c0001_00578
AT1G08130	Bra018652	Bra031612	-	c0001_00579
AT1G08135	Bra018651	Bra031614	-	c0001_00580
AT1G08160	Bra018648	Bra031615	Bra030714	c0001_00583
AT1G08170	Bra018646	-	-	c0001_00584
AT1G08180	Bra018645	-	Bra030715	c0001_00585
AT1G08190	Bra018644	-	-	c0001_00586
AT1G08210	-	Bra031617	Bra030717	c0001_00587
AT1G08220	-	Bra031618	Bra030718	c0001_00588
AT1G08260	Bra018641	-	-	c0001_00590
AT1G08270	Bra018640	-	-	c0001_00591
AT1G08280	Bra018639	-	-	c0001_00592
AT1G08290	Bra018638	Bra031621	-	c0001_00593
AT1G08300	Bra018637	-	-	c0001_00594
AT1G08315	Bra018635	-	-	c0001_00595
AT1G08320	Bra018634	Bra031622	-	c0001_00596
AT1G08340	Bra018633	-	-	c0001_00598
AT1G08350	Bra018632	-	-	c0001_00599
AT1G08360	Bra018631	-	-	c0001_00600
AT1G08370	Bra018630	Bra031623	Bra030721	c0001_00601
AT1G08380	Bra018629	Bra031624	Bra030722	c0001_00602
AT1G08390	Bra018628	-	-	c0001_00603
AT1G08400	Bra018627	-	-	c0001_00604
AT1G08410	-	Bra031625	Bra030723	c0001_00605
AT1G08420	Bra018626	Bra031626	Bra030724	c0001_00606
AT1G08430	Bra018625	-	Bra030726	c0001_00607
AT1G08450	-	Bra031627	Bra030727	c0001_00608
AT1G08460	-	Bra031628	-	c0001_00609
AT1G08465	Bra018624	Bra031629	Bra030728	c0001_00610
AT1G08470	Bra018623	-	-	c0001_00611
AT1G08480	Bra018622	-	Bra030729	c0001_00612
AT1G08490	Bra018621	-	-	c0001_00613
AT1G08500	-	Bra031630	Bra030730	c0001_00614
AT1G08510	Bra018620	Bra031631	Bra030731	c0001_00615
AT1G08520	Bra018619	-	-	c0001_00616
AT1G08530	Bra018618	-	-	c0001_00617
AT1G08540	Bra018617	-	Bra030732	c0001_00618
AT1G08550	Bra018616	-	-	c0001_00619
AT1G08560	Bra018615	-	Bra030733	c0001_00620
AT1G08570	Bra018614	Bra031632	-	c0001_00621
AT1G08580	Bra018613	Bra031633	-	c0001_00622
AT1G08590	-	-	Bra030734	c0001_00623
AT1G08600	Bra018612	Bra031634	-	c0001_00624
AT1G08610	-	Bra031635	-	c0001_00625
AT1G08620	-	-	Bra030735	c0001_00626
AT1G08630	Bra018611	Bra031636	Bra030736	c0001_00627
AT1G08640	Bra018610	-	-	c0001_00628
AT1G08650	Bra018609	-	Bra030737	c0001_00629
AT1G08660	Bra018608	Bra031637	-	c0001_00630
AT1G08670	-	Bra031638	-	c0001_00631
AT1G08680	Bra018607	-	-	c0001_00632
AT1G08700	Bra018606	-	-	c0001_00633
AT1G08720	-	Bra031639	-	c0001_00634
AT1G08750	Bra018604	-	-	c0001_00635
AT1G08760	Bra018603	Bra031640	-	c0001_00636
AT1G08770	Bra018602	-	-	c0001_00637
AT1G08780	Bra018601	-	Bra030740	c0001_00638
AT1G08790	Bra018600	-	Bra030741	c0001_00639
AT1G08800	Bra018599	-	Bra030742	c0001_00640
AT1G08810	Bra018598	-	Bra030743	c0001_00641
AT1G08820	Bra018597	Bra031641	Bra030744	c0001_00642
AT1G08830	-	Bra031642	-	c0001_00643
AT1G08840	-	Bra031643	-	c0001_00644
AT1G08845	Bra018596	Bra031644	-	c0001_00645
AT1G08860	-	Bra031645	-	c0001_00646
AT1G08880	Bra018595	Bra031646	Bra030745	c0001_00647
AT1G08890	Bra018594	Bra031649	Bra030748	c0001_00649
AT1G08940	Bra018590	-	-	c0001_00651
AT1G08980	-	Bra031652	-	c0001_00653
AT1G08990	-	Bra031653	Bra030750	c0001_00654
AT1G09010	Bra018587	-	Bra030751	c0001_00655
AT1G09020	Bra018586	Bra031654	Bra030752	c0001_00656
AT1G09030	Bra018585	-	-	c0001_00657
AT1G09040	Bra018583	Bra031655	Bra030753	c0001_00658
AT1G09060	-	-	Bra030754	c0001_00659
AT1G09070	Bra018582	Bra031656	Bra030755	c0001_00660
AT1G09080	-	Bra031657	-	c0001_00661
AT1G09090	-	Bra031658	-	c0001_00662
AT1G09130	-	-	Bra030756	c0703_00002
AT1G09140	Bra018581	-	-	c0001_00663
AT1G09150	Bra018580	-	Bra030757	c0001_00664
AT1G09160	Bra018578	-	Bra030759	c0001_00665
AT1G09170	-	-	Bra030760	c0001_00666
AT1G09180	Bra018576	-	-	c0001_00668
AT1G09190	Bra018577	-	-	c0001_00667
AT1G09210	Bra018575	-	Bra030763	c0001_00670
AT1G09240	Bra018573	-	-	c0001_00672
AT1G09250	Bra018572	-	-	c0001_00673
AT1G09270	Bra018570	-	Bra030765	c0001_00674
AT1G09280	Bra018569	-	-	c0001_00675
AT1G09290	-	-	Bra030766	c0001_00676
AT1G09300	-	-	Bra030767	c0001_00677
AT1G09310	Bra018568	-	Bra030768	c0001_00678
AT1G09330	Bra018566	-	Bra030769	c0001_00679
AT1G09340	Bra020030	Bra031662	-	c0001_00680
AT1G09350	-	Bra031663	-	c0001_00681
AT1G09360	Bra020029	-	-	c0001_00682
AT1G09370	Bra020028	-	-	c0001_00683
AT1G09380	Bra020026	Bra031664	-	c0001_00684
AT1G09390	Bra020025	-	-	c0001_00685
AT1G09400	-	-	Bra030774	c0001_00686
AT1G09420	-	-	Bra030775	c0001_00687
AT1G09430	-	-	Bra030777	c0001_00688
AT1G09440	Bra020024	Bra031665	-	c0001_00689
AT1G09460	Bra020023	-	Bra030780	c0001_00691
AT1G09470	Bra020022	-	-	c0001_00692
AT1G09480	Bra020021	-	-	c0001_00694
AT1G09520	Bra020018	Bra031667	Bra030782	c0001_00695
AT1G09530	Bra020017	Bra031668	-	c0001_00696
AT1G09540	Bra020016	Bra031669	Bra030783	c0001_00697
AT1G09550	Bra020015	-	Bra030784	c0001_00698
AT1G09560	Bra020014	Bra031671	Bra030785	c0001_00699
AT1G09570	Bra020013	Bra031672	-	c0001_00700
AT1G09575	Bra020011	-	-	c0001_00701
AT1G09580	Bra020010	Bra031678	Bra030786	c0001_00702
AT1G09590	Bra020009	Bra031673	Bra030787	c0001_00703
AT1G09610	-	-	Bra030789	c0001_00704
AT1G09620	Bra020007	Bra031675	-	c0001_00705
AT1G09630	Bra020006	-	-	c0001_00706
AT1G09640	Bra020005	Bra031676	Bra030790	c0001_00707
AT1G09660	Bra020003	-	Bra030791	c0001_00708
AT1G09680	Bra020001	-	-	c0001_00709
AT1G09700	Bra019999	-	Bra030793	c0001_00710
AT1G09710	Bra019998	-	-	c0001_00711
AT1G09720	Bra019997	-	-	c0001_00712
AT1G09730	Bra019996	-	Bra030794	c0001_00713
AT1G09740	Bra019995	-	Bra030795	c0001_00714
AT1G09750	-	-	Bra030796	c0001_00715
AT1G09760	Bra019994	Bra031683	Bra030797	c0001_00716
AT1G09770	Bra019993	-	Bra030798	c0001_00717
AT1G09780	-	-	Bra030799	c0001_00718
AT1G09790	Bra019992	-	Bra030800	c0001_00719
AT1G09795	Bra019991	-	-	c0001_00720
AT1G09800	Bra019990	Bra031684	-	c0001_00721
AT1G09810	Bra019988	-	-	c0001_00722
AT1G09812	Bra019987	-	Bra030801	c0056_00029
AT1G09815	Bra019986	-	-	c0056_00028
AT1G09820	Bra019985	-	-	c0056_00027
AT1G09830	Bra019984	-	Bra030802	c0056_00026
AT1G09840	Bra019983	-	Bra030803	c0056_00025
AT1G09850	Bra019982	-	-	c0056_00024
AT1G09860	Bra019981	-	-	c0056_00023
AT1G09870	Bra019980	Bra031686	-	c0056_00022
AT1G09880	Bra019979	-	Bra030804	c0056_00018
AT1G09900	Bra019977	-	-	c0056_00019
AT1G09920	Bra019975	Bra031687	Bra030805	c0056_00017
AT1G09930	-	Bra031688	-	c0056_00016
AT1G09932	-	Bra031689	Bra030806	c0056_00014
AT1G09940	-	Bra031690	-	c0056_00012
AT1G09950	Bra019973	Bra031691	-	c0056_00011
AT1G09960	Bra019972	Bra031692	-	c0056_00010
AT1G09970	Bra019971	Bra031693	Bra018468	c0056_00009
AT1G09980	Bra019970	Bra031694	-	c0056_00008
AT1G10010	Bra019969	Bra031697	-	c0056_00006
AT1G10020	Bra019966	-	Bra018467	c0056_00005
AT1G10040	-	-	Bra018465	c0056_00004
AT1G10050	-	Bra031698	-	c0056_00003
AT1G10060	Bra019964	Bra031699	Bra018463	c0056_00002
AT1G10090	-	-	Bra018462	c0001_00750
AT1G10120	Bra019962	Bra031700	Bra018461	c0001_00751
AT1G10130	Bra019960	Bra031701	-	c0001_00752
AT1G10140	Bra019961	Bra031702	Bra018460	c0001_00753
AT1G10150	-	Bra031703	Bra018459	c0001_00754
AT1G10155	Bra019959	-	-	c0001_00755
AT1G10170	Bra019958	Bra031704	Bra018458	c0001_00756
AT1G10200	Bra019956	-	Bra018454	c0001_00757
AT1G10220	Bra019954	Bra031705	Bra018453	c0001_00758
AT1G10270	Bra019952	Bra031706	Bra018451	c0001_00761
AT1G10280	Bra019951	-	Bra018450	c0001_00762
AT1G10290	Bra019950	Bra031707	Bra018449	c0001_00763
AT1G10310	-	-	Bra018447	c0001_00765
AT1G10320	Bra019944	-	Bra018446	c0001_00766
AT1G10330	Bra019943	-	-	c0001_00767
AT1G10340	-	-	Bra018444	c0001_00768
AT1G10350	Bra019942	-	Bra018443	c0001_00769
AT1G10360	Bra019940	Bra031708	-	c0001_00770
AT1G10380	Bra019939	-	-	c0001_00772
AT1G10385	-	-	Bra018442	c0001_00773
AT1G10400	-	-	Bra018440	c0001_00774
AT1G10410	Bra019937	Bra031710	-	c0001_00775
AT1G10417	Bra019936	-	-	c0001_00776
AT1G10430	Bra019934	Bra031712	-	c0001_00779
AT1G10450	Bra019933	-	-	c0001_00780
AT1G10470	Bra019932	Bra031714	Bra018439	c0001_00781
AT1G10480	-	Bra031715	Bra018438	c0001_00782
AT1G10490	-	Bra031716	Bra018437	c0001_00783
AT1G10500	Bra019928	-	Bra018436	c0001_00784
AT1G10510	Bra019926	-	Bra018435	c0001_00785
AT1G10522	Bra019925	-	-	c0001_00786
AT1G10530	-	Bra031717	-	c0001_00787
AT1G10550	-	-	Bra018433	c0001_00790
AT1G10560	Bra019924	-	-	c0001_00791
AT1G10570	Bra019923	-	-	c0001_00792
AT1G10580	Bra019919	-	-	c0001_00794
AT1G10585	Bra019918	Bra031721	-	c0001_00795
AT1G10590	Bra019916	Bra031722	Bra018432	c0001_00796
AT1G10600	Bra019915	-	-	c0001_00797
AT1G10610	Bra019914	Bra031723	-	c0001_00798
AT1G10620	Bra019913	Bra031735	Bra018431	c0001_00799
AT1G10640	Bra019912	Bra031724	Bra018429	c0001_00802
AT1G10650	Bra019910	-	Bra018428	c0001_00803
AT1G10657	Bra019909	-	-	c0001_00804
AT1G10660	Bra019908	-	Bra018426	c0001_00805
AT1G10670	-	-	Bra018425	c0001_00806
AT1G10690	Bra019906	-	-	c0001_00810
AT1G10700	Bra019905	-	-	c0001_00811
AT1G10710	-	Bra031754	-	c0380_00004
AT1G10720	-	Bra031753	-	c0001_00812
AT1G10730	Bra019904	Bra031752	-	c0001_00813
AT1G10740	-	Bra031751	Bra018424	c0001_00825
AT1G10750	-	Bra031750	-	c0001_00826
AT1G10760	-	Bra031749	Bra018423	c0001_00815
AT1G10770	Bra019903	Bra031748	Bra018422	c0001_00816
AT1G10780	-	Bra031747	-	c0001_00817
AT1G10790	Bra019902	-	-	c0001_00818
AT1G10800	Bra019901	-	-	c0001_00819
AT1G10840	Bra019898	Bra031745	Bra018420	c0001_00822
AT1G10850	Bra019897	-	-	c0001_00823
AT1G10870	Bra019896	-	-	c0001_00824
AT1G10880	Bra019894	-	Bra018419	c0001_00827
AT1G10890	Bra019893	-	-	c0001_00828
AT1G10900	Bra019892	Bra031742	-	c0001_00829
AT1G10910	Bra019891	Bra031731	-	c0001_00830
AT1G10940	Bra019890	Bra031740	Bra018417	c0001_00831
AT1G10950	Bra019888	Bra031739	Bra018416	c0001_00832
AT1G10960	-	-	Bra018415	c0001_00833
AT1G10970	-	Bra031738	-	c0001_00834
AT1G11020	-	Bra031736	Bra018414	c0001_00835
AT1G11040	Bra019886	-	Bra018413	c0001_00836
AT1G11060	Bra019885	Bra031734	-	c0001_00838
AT1G11070	Bra019884	Bra031733	-	c0001_00839
AT1G11080	Bra019883	-	-	c0001_00840
AT1G11090	Bra019882	-	-	c0001_00841
AT1G11112	Bra019881	-	-	c0001_00842
AT1G11120	Bra019880	Bra031732	Bra016852	c0001_00844
AT1G11130	Bra019878	Bra031727	-	c0001_00845
AT1G11160	-	Bra031757	-	c0001_00846
AT1G11170	Bra019877	-	Bra016851	c0001_00847
AT1G11180	Bra019876	-	-	c0001_00848
AT1G11190	-	Bra031758	Bra016849	c0001_00849
AT1G11200	-	-	Bra016848	c0001_00850
AT1G11210	Bra019875	-	-	c0001_00851
AT1G11240	Bra019873	-	Bra016847	c0001_00853
AT1G11250	Bra019872	Bra031761	Bra016846	c0001_00854
AT1G11260	Bra019870	Bra031762	-	c0001_00856
AT1G11280	-	-	Bra016842	c0001_00857
AT1G11310	Bra019869	Bra031763	Bra016840	c0001_00859
AT1G11320	Bra019868	-	Bra016839	c0001_00860
AT1G11330	Bra019865	Bra031766	-	c0001_00861
AT1G11360	Bra019861	-	-	c0001_00863
AT1G11380	Bra019860	-	-	c0001_00864
AT1G11390	Bra019859	Bra031767	-	c0001_00865
AT1G11400	Bra019858	-	Bra016837	c0001_00866
AT1G11410	Bra019843	-	Bra016836	c0001_00868
AT1G11430	Bra019853	-	Bra016835	c0001_00870
AT1G11440	Bra019852	-	Bra016834	c0001_00871
AT1G11475	Bra019851	-	Bra016833	c0261_00002
AT1G11480	Bra019850	-	-	c0001_00872
AT1G11490	Bra019849	-	-	c0001_00874
AT1G11500	Bra019848	Bra031768	-	c0001_00875
AT1G11510	Bra019847	-	-	c0001_00876
AT1G11530	-	Bra031769	-	c0001_00877
AT1G11545	Bra019846	-	-	c0001_00878
AT1G11560	-	-	Bra016832	c0001_00879
AT1G11580	-	Bra031771	-	c0001_00881
AT1G11600	-	Bra031773	Bra016828	c0001_00884
AT1G11630	Bra019842	-	-	c0001_00885
AT1G11650	-	Bra031774	-	c0001_00886
AT1G11660	Bra019840	-	Bra016825	c0001_00888
AT1G11670	-	Bra031776	Bra016824	c0001_00889
AT1G11680	Bra019839	-	Bra016822	c0001_00890
AT1G11690	Bra019838	-	Bra016819	c0001_00891
AT1G11700	Bra019837	-	-	c0001_00892
AT1G11730	Bra019835	-	-	c0001_00894
AT1G11740	Bra019833	-	Bra016817	c0001_00895
AT1G11750	-	Bra031777	Bra016816	c0001_00896
AT1G11755	Bra019832	-	Bra016815	c0129_00022
AT1G11760	-	-	Bra016814	c0001_00897
AT1G11765	-	Bra031779	-	c0001_00898
AT1G11770	Bra019831	Bra031780	-	c0001_00899
AT1G11780	-	Bra031781	-	c0001_00900
AT1G11790	Bra019830	-	Bra016813	c0001_00901
AT1G11800	-	Bra031783	-	c0001_00902
AT1G11820	-	-	Bra016812	c0129_00014
AT1G11840	-	-	Bra016811	c0001_00903
AT1G11850	-	Bra031784	-	c0001_00904
AT1G11860	-	Bra031785	Bra016810	c0001_00905
AT1G11870	-	Bra031786	Bra016808	c0001_00907
AT1G11880	-	Bra031787	Bra016807	c0001_00908
AT1G11890	Bra019723	Bra031788	Bra016806	c0001_00909
AT1G11900	Bra019724	-	-	c0001_00910
AT1G11910	Bra019727	Bra031790	Bra016805	c0001_00914
AT1G11915	Bra019728	-	Bra016804	c0001_00915
AT1G11920	Bra019730	-	-	c0001_00916
AT1G11925	-	Bra031796	-	c0001_00917
AT1G11930	-	-	Bra016803	c0001_00918
AT1G11940	-	Bra031797	Bra016802	c0001_00919
AT1G11950	-	-	Bra016801	c0001_00920
AT1G11960	Bra019731	-	-	c0001_00921
AT1G11990	Bra019732	-	-	c0001_00922
AT1G12000	Bra019733	-	Bra016799	c0001_00923
AT1G12010	Bra019734	Bra031798	-	c0001_00924
AT1G12030	Bra019736	-	Bra016797	c0001_00925
AT1G12040	Bra019737	Bra026996	Bra016796	c0001_00926
AT1G12050	Bra019738	-	-	c0001_00927
AT1G12060	-	-	Bra016795	c0001_00928
AT1G12064	Bra019739	Bra026995	Bra016794	c0001_00929
AT1G12070	Bra019740	Bra026994	Bra016793	c0001_00930
AT1G12090	Bra019742	-	Bra016790	c0001_00932
AT1G12110	Bra019744	Bra026991	Bra016789	c0001_00934
AT1G12120	Bra019746	Bra026990	Bra016788	c0079_00018
AT1G12150	-	Bra026987	Bra016786	c0079_00016
AT1G12200	Bra019747	Bra026986	-	c0079_00015
AT1G12230	Bra019748	-	-	c0079_00014
AT1G12240	Bra019749	Bra026984	-	c0079_00013
AT1G12244	-	Bra026983	-	c0079_00012
AT1G12250	-	Bra026982	-	c0079_00011
AT1G12260	Bra019750	Bra026981	Bra016783	c0079_00010
AT1G12270	-	Bra026980	-	c0079_00009
AT1G12280	Bra019755	Bra026977	Bra016781	c0079_00007
AT1G12310	Bra019756	Bra026976	-	c0079_00005
AT1G12320	Bra019758	Bra026975	Bra016780	c0079_00004
AT1G12330	Bra019759	-	Bra016777	c0079_00003
AT1G12360	Bra019760	Bra026974	-	c0079_00002
AT1G12370	-	-	Bra016776	c0079_00001
AT1G12380	Bra019761	Bra026973	Bra016775	c0001_00952
AT1G12390	Bra019762	-	Bra016774	c0001_00953
AT1G12400	Bra019763	-	-	c0193_00006
AT1G12410	Bra019764	Bra026972	-	c0001_00954
AT1G12420	Bra019765	-	Bra016773	c0001_00955
AT1G12430	Bra019766	-	-	c0001_00956
AT1G12440	-	Bra026970	-	c0001_00957
AT1G12450	Bra019767	Bra026969	Bra016771	c0001_00958
AT1G12470	Bra019769	-	Bra016770	c0001_00959
AT1G12480	Bra019770	-	-	c0001_00960
AT1G12500	Bra019771	-	Bra016769	c0001_00961
AT1G12520	-	Bra026968	Bra016768	c0001_00962
AT1G12530	Bra019772	-	-	c0001_00963
AT1G12540	Bra019773	-	-	c0001_00964
AT1G12550	Bra019774	Bra026966	-	c0001_00965
AT1G12560	Bra019775	Bra026965	Bra016767	c0001_00967
AT1G12570	-	-	Bra016766	c0001_00969
AT1G12580	-	Bra026964	Bra016765	c0001_00970
AT1G12600	-	-	Bra016764	c0001_00971
AT1G12610	Bra019777	Bra026963	Bra016761	c0001_00972
AT1G12620	-	-	Bra016762	c0001_00973
AT1G12640	Bra019778	-	-	c0001_00975
AT1G12650	-	Bra026962	-	c0001_00976
AT1G12660	-	Bra026960	-	c0001_00977
AT1G12663	Bra019779	-	-	c0001_00978
AT1G12740	Bra019782	Bra026956	-	c0001_00981
AT1G12750	Bra019783	-	-	c0001_00982
AT1G12760	Bra019784	Bra026955	Bra016759	c0001_00983
AT1G12770	-	-	Bra016758	c0001_00984
AT1G12780	Bra019785	-	Bra016757	c0001_00985
AT1G12790	Bra019786	-	-	c0001_00986
AT1G12800	Bra019788	-	-	c0001_00987
AT1G12805	Bra019791	-	Bra016756	c0001_00988
AT1G12820	-	Bra026953	Bra016754	c0001_00990
AT1G12830	-	Bra026952	Bra016753	c0001_00991
AT1G12840	Bra019792	Bra026951	Bra016752	c0001_00992
AT1G12850	-	-	Bra016750	c0001_00994
AT1G12860	Bra019794	Bra026950	Bra016749	c0001_00995
AT1G12890	-	Bra026949	-	c0001_00996
AT1G12900	Bra019722	Bra026948	-	c0001_00997
AT1G12910	Bra019798	Bra026947	-	c0001_00998
AT1G12920	-	-	Bra016748	c0001_00999
AT1G12930	Bra019800	Bra026946	-	c0001_01000
AT1G12940	-	-	Bra016747	c0001_01001
AT1G12950	-	Bra026945	-	c0001_01002
AT1G12970	-	Bra026944	-	c0001_01003
AT1G12980	Bra019801	Bra026942	-	c0001_01004
AT1G12990	Bra019802	-	Bra016746	c0001_01005
AT1G13000	Bra019803	-	-	c0001_01006
AT1G13030	Bra019804	Bra026939	-	c0001_01007
AT1G13060	Bra019807	Bra026938	-	c0001_01009
AT1G13080	Bra019809	Bra026933	Bra016740	c0001_01010
AT1G13120	Bra019810	Bra026928	-	c0001_01013
AT1G13130	Bra019811	Bra026925	-	c0001_01014
AT1G13140	Bra019812	-	Bra016739	c0001_01015
AT1G13160	-	Bra026921	-	c0001_01016
AT1G13170	Bra019814	-	-	c0001_01017
AT1G13180	Bra019815	-	Bra016738	c0001_01018
AT1G13190	Bra019816	-	-	c0001_01019
AT1G13195	Bra019817	Bra026920	-	c0001_01020
AT1G13200	-	Bra026918	Bra016737	c0525_00003
AT1G13210	Bra019818	Bra026919	-	c0001_01021
AT1G13250	Bra019820	-	-	c0001_01024
AT1G13260	Bra019821	Bra026917	-	c0001_01025
AT1G13270	-	Bra026916	-	c0001_01026
AT1G13280	-	-	Bra016735	c0001_01027
AT1G13290	Bra019822	-	-	c0001_01028
AT1G13300	Bra019824	-	Bra016734	c0001_01029
AT1G13330	Bra019825	-	-	c0001_01032
AT1G13340	Bra019826	Bra026912	Bra016733	c0001_01033
AT1G13360	Bra019827	-	Bra016732	c0001_01034
AT1G13380	Bra019828	-	-	c0001_01035
AT1G13390	Bra019829	Bra026907	Bra016731	c0001_01036
AT1G13410	-	-	Bra016730	c0001_01038
AT1G13440	-	Bra026904	Bra016729	c0001_01039
AT1G13450	Bra019721	Bra026903	-	c0001_01040
AT1G13460	Bra019720	-	-	c0001_01041
AT1G13470	Bra019719	Bra026900	Bra016727	c0001_01042
AT1G13560	Bra019718	Bra026899	-	c0142_00007
AT1G13570	Bra019717	-	-	c0142_00008
AT1G13580	-	Bra026898	-	c0142_00009
AT1G13590	Bra019716	Bra026897	-	c0001_01044
AT1G13600	Bra019715	Bra026895	-	c0001_01045
AT1G13610	Bra019712	-	-	c0142_00015
AT1G13620	Bra040728	-	-	c0508_00001
AT1G13630	Bra040726	-	-	c0508_00002
AT1G13635	Bra040725	-	-	c0001_01069
AT1G13640	Bra040724	-	-	c0001_01068
AT1G13690	Bra040722	-	-	c0001_01064
AT1G13700	Bra040721	Bra026893	-	c0001_01063
AT1G13710	Bra040720	Bra026892	-	c0001_01062
AT1G13730	Bra019707	-	-	c0001_01061
AT1G13740	Bra019706	Bra026891	-	c0001_01060
AT1G13750	Bra019705	Bra026890	-	c0001_01059
AT1G13800	Bra019702	Bra026927	-	c0001_01057
AT1G13810	-	Bra026881	-	c0001_01056
AT1G13830	Bra019700	Bra026878	Bra016724	c0001_01055
AT1G13880	-	Bra026876	Bra016722	c0001_01053
AT1G13890	-	Bra026875	-	c0001_01052
AT1G13900	Bra019699	Bra026874	Bra016721	c0001_01051
AT1G13910	-	Bra026823	-	c0001_01050
AT1G13930	-	-	Bra016718	c0001_01049
AT1G13940	-	Bra026871	Bra016717	c0001_01048
AT1G13960	Bra019697	Bra026869	Bra016716	c0001_01073
AT1G13970	Bra019696	Bra026868	-	c0001_01074
AT1G13990	Bra019693	-	-	c0001_01075
AT1G14000	Bra019692	Bra026867	-	c0001_01076
AT1G14010	-	Bra026866	Bra016715	c0001_01077
AT1G14020	Bra019691	-	Bra016714	c0001_01078
AT1G14030	-	Bra026865	-	c0001_01079
AT1G14040	Bra019690	Bra026863	-	c0001_01080
AT1G14060	-	Bra026862	Bra016713	c0001_01081
AT1G14100	Bra019681	-	Bra016709	c0001_01082
AT1G14120	Bra019678	Bra026856	Bra016708	c0001_01086
AT1G14150	Bra019675	Bra026854	-	c0001_01088
AT1G14160	-	Bra026853	-	c0001_01089
AT1G14170	Bra019674	Bra026852	-	c0001_01090
AT1G14180	Bra019673	Bra026851	-	c0001_01091
AT1G14185	-	Bra026850	-	c0001_01092
AT1G14200	Bra019672	Bra026849	-	c0001_01093
AT1G14205	-	Bra026848	-	c0001_01094
AT1G14210	-	Bra026846	-	c0001_01095
AT1G14230	Bra019670	Bra026841	-	c0001_01097
AT1G14260	Bra019668	Bra026840	-	c0001_01100
AT1G14270	Bra019667	-	Bra016707	c0001_01101
AT1G14280	Bra019666	-	-	c0001_01102
AT1G14310	Bra019663	-	-	c0001_01104
AT1G14320	Bra019662	Bra026839	Bra016706	c0001_01105
AT1G14330	-	Bra026838	-	c0001_01106
AT1G14340	Bra019660	-	Bra016705	c0001_01107
AT1G14345	Bra019659	-	-	c0001_01109
AT1G14350	Bra019658	Bra026837	-	c0001_01110
AT1G14360	Bra019657	Bra026835	-	c0001_01111
AT1G14370	Bra026223	Bra026834	-	c0001_01112
AT1G14380	Bra019653	-	-	c0001_01113
AT1G14400	Bra026222	Bra026833	Bra016703	c0001_01115
AT1G14410	-	-	Bra016702	c0001_01116
AT1G14420	Bra026221	Bra026832	Bra016700	c0001_01117
AT1G14430	Bra026220	Bra026831	Bra016701	c0001_01118
AT1G14440	Bra026219	Bra026830	-	c0001_01119
AT1G14450	Bra026218	Bra026829	-	c0001_01120
AT1G14480	Bra026213	Bra026826	-	c0001_01121
AT1G14490	Bra026211	-	-	c0001_01122
AT1G14510	Bra026210	Bra026825	Bra016698	c0001_01123
AT1G14520	Bra026209	-	-	c0001_01124
AT1G14530	Bra026208	-	-	c0001_01125
AT1G14540	Bra026207	Bra026822	-	c0001_01126
AT1G14560	Bra026206	-	Bra016697	c0001_01127
AT1G14570	Bra026205	-	-	c0001_01128
AT1G14580	Bra026204	Bra026819	Bra016694	c0001_01129
AT1G14600	Bra026202	Bra026818	-	c0001_01131
AT1G14610	Bra026200	Bra026816	Bra016693	c0001_01133
AT1G14660	Bra026197	-	-	c0001_01135
AT1G14670	-	-	Bra016687	c0001_01138
AT1G14680	-	Bra026814	-	c0001_01139
AT1G14685	Bra026196	Bra026813	Bra016686	c0001_01140
AT1G14686	Bra026195	-	-	c0001_01141
AT1G14687	-	Bra026812	-	c0001_01142
AT1G14690	-	Bra026811	-	c0001_01143
AT1G14710	Bra026194	Bra026810	Bra016682	c0001_01145
AT1G14720	-	Bra026809	-	c0001_01146
AT1G14730	Bra026193	Bra026808	-	c0001_01147
AT1G14740	Bra026192	-	-	c0001_01148
AT1G14750	Bra026191	Bra026807	Bra016681	c0001_01149
AT1G14760	Bra026190	Bra026805	-	c0001_01150
AT1G14770	Bra026189	-	-	c0001_01151
AT1G14780	Bra026188	Bra026804	-	c0001_01152
AT1G14790	Bra026187	-	-	c0001_01153
AT1G14810	Bra026186	-	Bra016680	c0001_01155
AT1G14840	Bra026184	Bra026800	-	c0001_01157
AT1G14850	Bra026183	Bra026798	-	c0001_01158
AT1G14860	Bra026182	Bra026797	-	c0001_01159
AT1G14870	Bra026181	Bra026794	-	c0001_01160
AT1G14890	Bra026180	-	Bra016678	c0001_01162
AT1G14910	Bra026179	-	-	c0001_01164
AT1G14970	Bra026174	Bra026790	-	c0001_01165
AT1G14980	Bra026173	Bra026789	Bra016677	c0001_01166
AT1G14990	Bra026172	Bra026788	-	c0001_01167
AT1G15000	Bra026171	Bra026787	-	c0001_01168
AT1G15010	Bra026170	-	Bra016675	c0001_01169
AT1G15020	Bra026169	Bra026786	-	c0001_01170
AT1G15030	Bra026168	Bra026785	-	c0001_01171
AT1G15040	Bra026167	Bra026784	-	c0001_01172
AT1G15060	-	Bra026783	Bra016674	c0001_01173
AT1G15110	-	Bra026780	-	c0001_01174
AT1G15120	Bra026164	-	Bra016673	c0001_01175
AT1G15130	Bra026162	Bra026779	-	c0001_01176
AT1G15140	Bra026161	-	Bra016672	c0001_01177
AT1G15150	Bra026160	Bra026778	Bra016671	c0001_01178
AT1G15190	Bra026159	-	Bra016670	c0001_01179
AT1G15200	Bra026158	Bra026777	-	c0001_01180
AT1G15210	Bra026157	-	Bra016669	c0001_01181
AT1G15215	Bra026155	-	-	c0001_01182
AT1G15240	Bra026152	Bra026776	-	c0001_01184
AT1G15280	Bra026148	-	Bra016666	c0001_01185
AT1G15290	Bra026147	-	-	c0001_01186
AT1G15310	Bra026145	-	-	c0001_01188
AT1G15320	Bra026144	-	-	c0001_01189
AT1G15330	Bra026143	-	-	c0001_01190
AT1G15340	-	Bra026773	Bra016665	c0001_01191
AT1G15360	Bra026140	Bra026770	Bra016663	c0001_01192
AT1G15370	Bra026139	Bra026769	-	c0001_01193
AT1G15380	Bra026138	Bra026768	Bra016662	c0001_01194
AT1G15385	Bra026137	Bra026767	Bra016661	c0001_01195
AT1G15390	Bra026135	Bra026766	-	c0001_01196
AT1G15400	Bra026134	Bra026765	-	c0001_01197
AT1G15410	Bra026133	-	-	c0001_01199
AT1G15415	Bra026132	-	Bra016660	c0001_01200
AT1G15420	Bra026131	Bra026763	Bra016659	c0001_01201
AT1G15430	Bra026130	Bra026761	Bra016658	c0001_01202
AT1G15440	Bra026129	-	Bra016657	c0001_01203
AT1G15480	Bra026128	-	-	c0001_01205
AT1G15490	Bra026127	-	-	c0001_01206
AT1G15500	Bra026126	-	Bra016656	c0001_01207
AT1G15510	Bra026125	-	-	c0001_01208
AT1G15520	Bra026124	Bra026759	-	c0001_01209
AT1G15530	-	Bra026758	-	c0001_01210
AT1G15540	Bra026123	-	-	c0001_01211
AT1G15550	Bra026122	Bra026757	-	c0001_01212
AT1G15570	Bra026120	Bra026756	Bra016654	c0001_01215
AT1G15580	-	Bra026755	-	c0001_01216
AT1G15670	Bra026116	Bra026753	-	c0001_01218
AT1G15690	Bra026115	-	Bra016653	c0001_01219
AT1G15700	-	-	Bra016652	c0001_01220
AT1G15710	-	Bra026752	-	c0001_01221
AT1G15730	Bra026114	-	-	c0001_01222
AT1G15740	Bra026113	-	-	c0001_01223
AT1G15750	Bra026112	Bra026751	-	c0001_01224
AT1G15757	-	Bra026750	-	c0001_01225
AT1G15760	Bra026110	-	-	c0001_01226
AT1G15770	Bra026108	Bra026748	Bra016651	c0001_01227
AT1G15800	Bra026101	Bra026747	-	c0001_01229
AT1G15810	Bra026100	Bra026746	-	c0001_01230
AT1G15820	Bra026099	Bra026745	Bra016650	c0001_01231
AT1G15860	Bra026097	Bra026742	Bra016649	c0001_01234
AT1G15870	Bra026096	-	-	c0001_01235
AT1G15880	Bra026095	Bra026741	Bra016648	c0001_01236
AT1G15890	Bra026094	-	-	c0001_01237
AT1G15910	-	Bra026740	-	c0001_01239
AT1G15920	Bra026093	-	-	c0001_01240
AT1G15940	Bra026091	Bra026738	Bra016646	c0001_01241
AT1G15950	Bra026090	Bra026737	-	c0001_01242
AT1G15960	Bra026089	-	-	c0001_01243
AT1G15970	-	Bra026736	Bra016645	c0001_01244
AT1G15980	Bra026087	-	-	c0001_01245
AT1G16020	-	Bra026735	-	c0001_01247
AT1G16030	Bra026084	-	Bra016644	c0001_01249
AT1G16040	Bra026083	Bra026734	Bra016643	c0001_01250
AT1G16060	Bra026082	-	-	c0001_01251
AT1G16070	Bra026081	-	-	c0001_01252
AT1G16150	-	Bra026731	-	c0001_01253
AT1G16170	Bra026079	Bra026730	Bra016642	c0001_01255
AT1G16180	-	Bra026729	-	c0001_01256
AT1G16190	Bra026076	Bra026728	-	c0001_01257
AT1G16220	Bra026075	-	-	c0133_00016
AT1G16225	Bra026074	Bra026727	-	c0133_00015
AT1G16250	Bra026073	-	Bra016641	c0001_01260
AT1G16270	Bra026049	Bra026726	-	c0001_01261
AT1G16280	Bra026071	Bra026725	-	c0133_00012
AT1G16290	Bra026052	-	-	c0133_00011
AT1G16300	Bra026068	-	-	c0133_00010
AT1G16310	Bra026067	Bra026723	-	c0133_00009
AT1G16320	Bra026066	-	-	c0133_00008
AT1G16330	Bra026065	-	Bra016640	c0133_00007
AT1G16350	Bra026064	-	-	c0133_00005
AT1G16370	Bra026062	-	Bra016638	c0133_00004
AT1G16380	Bra026059	-	Bra016639	c0133_00003
AT1G16400	Bra026058	-	-	c0133_00002
AT1G16430	Bra026057	-	-	c0001_01272
AT1G16440	Bra026056	-	-	c0115_00019
AT1G16445	-	Bra026721	-	c0115_00018
AT1G16460	Bra026055	-	-	c0001_01274
AT1G16480	-	-	Bra016637	c0115_00014
AT1G16490	Bra026048	Bra026720	-	c0001_01277
AT1G16500	Bra026046	Bra026718	-	c0001_01278
AT1G16510	Bra026044	Bra026717	-	c0001_01280
AT1G16520	Bra026043	-	-	c0001_01281
AT1G16530	Bra026042	Bra026716	-	c0001_01282
AT1G16540	Bra026041	-	-	c0001_01283
AT1G16560	Bra026040	Bra026715	-	c0115_00006
AT1G16570	Bra026039	Bra026714	-	c0001_01284
AT1G16590	-	Bra026713	-	c0001_01285
AT1G16610	Bra026037	Bra026712	-	c0115_00003
AT1G16630	Bra026035	-	-	c0001_01288
AT1G16650	Bra026033	-	-	c0001_01290
AT1G16670	Bra026032	Bra026710	-	c0001_01291
AT1G16680	Bra026031	-	-	c0001_01292
AT1G16705	Bra026030	Bra026708	Bra016634	c0001_01295
AT1G16720	Bra026029	-	-	c0001_01296
AT1G16730	-	-	Bra016633	c0001_01297
AT1G16740	Bra026028	-	-	c0001_01298
AT1G16750	-	-	Bra016632	c0001_01299
AT1G16790	Bra026026	-	-	c0001_01301
AT1G16800	-	Bra026706	-	c0001_01302
AT1G16825	-	Bra026704	-	c0572_00004
AT1G16830	Bra026024	-	-	c0572_00003
AT1G16840	Bra026023	Bra026702	-	c0001_01305
AT1G16850	Bra026022	Bra026701	-	c0001_01306
AT1G16860	Bra026021	-	Bra016629	c0001_01307
AT1G16870	Bra026020	-	Bra016628	c0001_01308
AT1G16880	Bra026019	-	Bra016627	c0001_01309
AT1G16890	Bra026018	Bra026700	Bra016626	c0001_01310
AT1G16900	Bra026017	-	Bra016625	c0001_01311
AT1G16920	Bra026016	Bra026698	Bra016624	c0001_01312
AT1G16930	Bra026015	Bra026697	-	c0001_01313
AT1G16950	Bra026013	Bra026696	Bra016623	c0001_01315
AT1G16960	-	-	Bra016622	c0001_01316
AT1G16970	Bra026012	-	-	c0001_01317
AT1G17010	Bra026008	Bra026693	-	c0001_01319
AT1G17050	Bra026006	-	-	c0001_01322
AT1G17060	Bra026005	Bra026692	Bra016621	c0001_01323
AT1G17070	-	Bra026691	-	c0001_01324
AT1G17080	-	Bra026690	Bra016620	c0001_01325
AT1G17090	-	Bra026689	Bra016619	c0001_01326
AT1G17100	Bra026004	-	-	c0001_01327
AT1G17110	Bra026003	-	Bra016618	c0001_01328
AT1G17140	Bra026000	Bra026686	Bra016617	c0001_01330
AT1G17145	Bra025999	-	-	c0001_01331
AT1G17150	Bra025997	-	-	c0001_01332
AT1G17160	Bra025996	Bra026685	-	c0001_01333
AT1G17170	Bra025995	Bra026684	Bra016615	c0001_01334
AT1G17200	Bra025991	Bra026678	Bra016614	c0001_01337
AT1G17210	Bra025990	-	Bra016613	c0001_01338
AT1G17220	Bra025989	-	Bra016612	c0001_01339
AT1G17230	Bra025988	-	-	c0001_01340
AT1G17260	-	-	Bra016610	c0001_01342
AT1G17285	Bra025985	Bra026676	-	c0001_01344
AT1G17290	Bra025984	Bra026675	Bra016607	c0001_01345
AT1G17310	-	Bra026674	-	c0001_01346
AT1G17340	Bra025982	Bra026673	-	c0001_01347
AT1G17345	Bra025981	-	Bra016606	c0001_01349
AT1G17350	Bra025980	-	-	c0001_01350
AT1G17360	Bra025979	-	-	c0001_01351
AT1G17370	-	Bra030985	-	c0001_01352
AT1G17380	Bra025977	Bra030986	Bra016604	c0001_01353
AT1G17400	Bra025976	-	Bra016603	c0001_01354
AT1G17420	-	Bra030988	Bra016602	c0001_01356
AT1G17430	-	-	Bra016601	c0001_01357
AT1G17440	Bra025975	Bra030989	-	c0001_01358
AT1G17460	Bra025973	-	-	c0001_01359
AT1G17470	Bra025972	-	Bra016599	c0001_01360
AT1G17480	Bra025971	-	-	c0001_01361
AT1G17490	Bra025969	-	-	c0001_01362
AT1G17500	-	Bra030991	-	c0001_01363
AT1G17510	Bra025968	-	-	c0001_01364
AT1G17520	Bra025967	Bra030992	Bra016598	c0001_01365
AT1G17530	Bra025966	-	Bra016597	c0001_01366
AT1G17540	Bra025965	-	Bra016596	c0001_01367
AT1G17545	Bra025964	Bra026703	Bra016595	c0001_01368
AT1G17560	Bra025963	-	-	c0001_01369
AT1G17580	-	Bra030993	-	c0001_01370
AT1G17590	-	Bra030996	-	c0001_01371
AT1G17620	Bra025961	-	Bra016593	c0001_01372
AT1G17630	Bra025960	-	-	c0001_01373
AT1G17680	Bra025955	-	-	c0001_01376
AT1G17700	Bra025954	Bra031001	-	c0001_01377
AT1G17710	Bra025953	Bra031002	Bra016591	c0001_01378
AT1G17720	Bra025952	Bra031003	Bra016590	c0001_01379
AT1G17745	-	-	Bra016589	c0001_01380
AT1G17750	Bra025673	-	-	c0001_01381
AT1G17760	-	-	Bra016588	c0001_01382
AT1G17790	Bra025948	Bra031004	Bra016586	c0001_01384
AT1G17810	Bra025947	Bra031005	-	c0001_01386
AT1G17820	Bra025946	Bra031006	-	c0001_01387
AT1G17840	Bra025944	-	Bra016584	c0001_01388
AT1G17850	Bra025943	-	-	c0001_01389
AT1G17860	Bra025942	-	Bra016580	c0001_01390
AT1G17870	Bra025941	-	-	c0001_01391
AT1G17880	Bra025940	Bra031007	Bra016579	c0001_01392
AT1G17890	Bra025939	-	-	c0001_01393
AT1G17920	Bra025938	-	Bra016578	c0001_01394
AT1G17930	Bra025937	-	Bra016577	c0001_01395
AT1G17940	Bra025936	-	-	c0001_01396
AT1G17950	-	Bra031008	Bra016575	c0001_01397
AT1G17970	-	-	Bra016574	c0001_01398
AT1G17980	-	Bra031010	Bra016573	c0001_01399
AT1G18000	-	Bra031011	-	c0001_01400
AT1G18030	Bra025933	-	-	c0001_01401
AT1G18040	-	Bra031013	Bra016572	c0001_01402
AT1G18070	Bra025932	-	Bra016571	c0001_01403
AT1G18080	Bra025931	Bra031014	Bra016570	c0001_01405
AT1G18090	-	-	Bra016569	c0001_01406
AT1G18100	Bra025930	Bra031016	-	c0001_01407
AT1G18140	-	-	Bra016568	c0001_01408
AT1G18150	Bra025929	Bra031017	Bra016567	c0001_01409
AT1G18160	Bra025927	-	-	c0001_01410
AT1G18180	Bra025926	-	-	c0001_01411
AT1G18190	Bra025925	-	Bra016566	c0001_01412
AT1G18210	Bra025924	-	Bra016564	c0001_01413
AT1G18250	Bra025923	-	-	c0001_01414
AT1G18260	Bra025922	-	-	c0001_01415
AT1G18265	Bra025921	-	-	c0001_01416
AT1G18270	Bra025920	-	-	c0001_01417
AT1G18280	Bra025919	Bra031024	Bra016563	c0001_01418
AT1G18290	Bra025918	Bra031025	Bra016562	c0001_01419
AT1G18300	Bra025917	-	Bra016561	c0001_01420
AT1G18320	-	Bra031026	Bra016560	c0001_01422
AT1G18340	Bra025913	-	-	c0001_01423
AT1G18400	Bra025910	-	-	c0001_01426
AT1G18410	Bra025908	-	-	c0001_01424
AT1G18420	Bra025906	-	-	c0001_01428
AT1G18440	Bra025905	-	-	c0001_01429
AT1G18470	Bra025904	Bra031030	Bra016557	c0001_01431
AT1G18490	Bra025900	-	-	c0001_01432
AT1G18500	Bra025899	Bra031031	-	c0001_01433
AT1G18510	Bra025898	-	-	c0001_01434
AT1G18520	Bra025897	Bra031032	Bra016556	c0001_01435
AT1G18530	Bra025896	Bra031033	-	c0001_01436
AT1G18540	Bra025895	Bra031034	Bra016555	c0001_01437
AT1G18550	Bra025894	-	-	c0001_01438
AT1G18570	Bra025666	Bra031035	Bra016553	c0001_01440
AT1G18580	Bra025667	Bra031036	Bra016552	c0001_01442
AT1G18590	Bra025668	-	-	c0001_01444
AT1G18600	Bra025671	-	-	c0001_01445
AT1G18610	Bra025672	-	Bra016550	c0001_01446
AT1G18620	-	Bra031037	-	c0001_01447
AT1G18660	Bra025676	Bra031038	-	c0001_01449
AT1G18670	-	-	Bra016547	c0001_01451
AT1G18680	-	Bra031039	-	c0001_01452
AT1G18690	Bra025677	-	-	c0001_01453
AT1G18700	-	Bra031040	-	c0001_01454
AT1G18710	Bra025678	Bra031041	Bra016546	c0001_01455
AT1G18720	-	Bra031044	Bra016545	c0001_01458
AT1G18730	Bra025682	Bra031047	-	c0001_01459
AT1G18740	Bra025683	Bra031048	-	c0001_01460
AT1G18750	Bra025685	Bra031049	Bra016544	c0001_01461
AT1G18800	Bra025687	-	Bra016541	c0001_01462
AT1G18810	-	-	Bra016540	c0001_01463
AT1G18830	-	-	Bra016539	c0001_01464
AT1G18835	Bra025688	Bra031051	Bra016538	c0001_01465
AT1G18840	Bra025690	Bra031052	Bra016536	c0001_01466
AT1G18850	Bra025691	-	-	c0001_01467
AT1G18860	Bra025692	Bra031053	Bra016535	c0001_01468
AT1G18870	Bra025694	-	-	c0001_01469
AT1G18880	Bra025695	Bra031054	Bra016534	c0001_01470
AT1G18890	Bra025696	Bra031055	-	c0001_01471
AT1G18900	Bra025697	-	Bra016533	c0001_01472
AT1G18910	Bra025698	Bra031056	-	c0001_01473
AT1G18940	Bra025702	-	-	c0001_01474
AT1G18950	Bra025703	Bra031057	Bra016532	c0001_01475
AT1G18960	-	-	Bra016531	c0001_01476
AT1G18970	Bra025704	Bra031058	-	c0001_01477
AT1G18990	Bra025705	Bra031059	-	c0001_01479
AT1G19000	-	Bra031060	Bra016530	c0001_01480
AT1G19010	-	-	Bra016529	c0001_01481
AT1G19020	Bra025707	Bra031061	Bra016528	c0001_01482
AT1G19025	-	Bra031062	-	c0001_01483
AT1G19050	Bra025708	-	Bra016526	c0001_01484
AT1G19090	Bra025709	-	-	c0001_01485
AT1G19110	Bra025710	Bra031064	Bra016525	c0001_01486
AT1G19140	Bra025711	-	Bra016523	c0001_01489
AT1G19150	-	-	Bra016522	c0001_01490
AT1G19180	Bra025713	Bra031065	Bra016520	c0001_01491
AT1G19200	Bra025715	-	-	c0001_01493
AT1G19210	Bra025719	Bra031069	Bra016518	c0218_00005
AT1G19220	Bra025720	-	Bra016517	c0001_01494
AT1G19230	Bra025721	Bra031070	-	c0001_01495
AT1G19240	Bra025722	-	-	c0218_00002
AT1G19250	Bra025723	Bra031073	Bra016515	c0218_00001
AT1G19290	-	-	Bra016513	c0001_01498
AT1G19300	Bra025726	-	Bra016512	c0001_01499
AT1G19310	Bra025727	-	-	c0001_01500
AT1G19320	Bra025728	Bra031074	Bra016510	c0001_01501
AT1G19330	Bra025729	Bra031076	Bra016509	c0001_01503
AT1G19340	Bra025732	-	-	c0001_01504
AT1G19350	Bra025733	Bra031077	Bra016508	c0001_01505
AT1G19360	Bra025734	-	Bra016507	c0001_01506
AT1G19370	Bra025735	-	-	c0001_01507
AT1G19380	-	-	Bra016506	c0001_01508
AT1G19400	-	Bra031080	-	c0001_01509
AT1G19430	Bra025737	-	-	c0001_01510
AT1G19440	Bra025738	Bra031081	-	c0001_01512
AT1G19450	Bra025740	Bra031082	-	c0001_01513
AT1G19480	Bra025741	-	-	c0001_01514
AT1G19485	Bra025742	-	Bra016505	c0077_00024
AT1G19490	Bra025743	-	-	c0001_01516
AT1G19510	Bra025745	Bra012183	-	c0001_01517
AT1G19520	Bra025746	-	-	c0077_00022
AT1G19530	Bra025747	-	-	c0077_00021
AT1G19540	Bra025748	-	-	c0077_00020
AT1G19550	Bra025749	-	Bra016503	c0077_00019
AT1G19580	Bra025750	-	Bra016502	c0077_00018
AT1G19600	Bra025751	-	-	c0077_00017
AT1G19610	-	-	Bra016501	c0077_00016
AT1G19620	Bra025752	-	Bra016500	c0077_00015
AT1G19630	-	-	Bra016499	c0077_00014
AT1G19640	Bra025753	Bra012184	Bra016498	c0077_00012
AT1G19650	Bra025754	Bra012186	-	c0077_00011
AT1G19660	Bra025755	-	-	c0077_00009
AT1G19670	Bra025756	-	-	c0077_00008
AT1G19690	Bra025757	-	-	c0077_00007
AT1G19700	Bra025758	-	Bra016497	c0077_00006
AT1G19710	Bra025759	-	-	c0001_01531
AT1G19715	Bra025760	-	Bra016496	c0077_00004
AT1G19720	Bra025761	-	-	c0001_01532
AT1G19730	Bra025762	-	-	c0001_01533
AT1G19740	Bra025763	-	-	c0001_01534
AT1G19770	Bra025764	-	Bra016495	c0001_01535
AT1G19790	Bra025768	-	-	c0001_01536
AT1G19800	Bra025769	-	-	c0001_01537
AT1G19830	Bra025770	-	-	c0001_01538
AT1G19835	Bra025772	-	Bra016494	c0001_01539
AT1G19840	Bra025774	Bra012188	Bra016493	c0001_01540
AT1G19850	Bra025775	Bra012190	Bra016492	c0001_01541
AT1G19860	Bra025776	-	Bra016491	c0001_01542
AT1G19870	Bra025777	-	Bra016490	c0001_01543
AT1G19880	Bra025778	Bra012191	-	c0001_01544
AT1G19900	Bra025780	Bra012194	Bra016489	c0001_01545
AT1G19910	Bra025781	Bra012197	Bra016488	c0001_01546
AT1G19940	Bra025783	Bra012198	-	c0001_01547
AT1G19950	Bra025784	-	Bra016486	c0001_01548
AT1G19970	Bra025786	Bra012200	Bra016483	c0001_01549
AT1G19980	-	Bra012201	Bra016482	c0001_01550
AT1G19990	Bra025787	-	-	c0001_01551
AT1G20020	-	Bra012203	Bra016481	c0001_01552
AT1G20060	-	Bra012205	-	c0001_01554
AT1G20070	Bra025790	Bra012207	Bra016479	c0001_01556
AT1G20080	-	Bra012209	Bra016478	c0001_01557
AT1G20090	-	Bra012210	Bra016477	c0001_01558
AT1G20100	Bra025792	-	-	c0001_01559
AT1G20120	Bra025794	Bra012212	Bra016475	c0001_01560
AT1G20140	Bra025795	Bra012214	-	c0001_01562
AT1G20150	Bra025796	Bra012217	-	c0001_01563
AT1G20180	Bra025799	-	Bra016474	c0001_01565
AT1G20190	Bra025800	Bra012218	Bra016473	c0001_01566
AT1G20200	-	Bra012219	-	c0001_01567
AT1G20220	Bra025801	-	Bra016472	c0001_01568
AT1G20225	Bra025802	-	-	c0001_01569
AT1G20230	Bra025803	-	-	c0001_01570
AT1G20260	Bra025804	Bra012223	-	c0001_01571
AT1G20270	Bra025805	-	Bra016471	c0001_01572
AT1G20300	Bra025806	-	-	c0001_01573
AT1G20310	Bra025807	Bra012225	-	c0001_01574
AT1G20330	Bra025810	-	-	c0001_01575
AT1G20340	Bra025812	Bra012226	Bra016470	c0001_01576
AT1G20370	Bra025814	-	-	c0001_01581
AT1G20380	Bra025816	-	-	c0001_01582
AT1G20410	Bra025817	Bra012228	-	c0001_01583
AT1G20430	-	Bra012229	-	c0001_01585
AT1G20440	Bra025819	Bra012230	-	c0001_01586
AT1G20460	Bra025820	-	-	c0001_01587
AT1G20470	Bra025821	Bra012231	-	c0140_00009
AT1G20480	Bra025822	Bra012233	Bra016463	c0001_01588
AT1G20520	-	-	Bra016462	c0001_01592
AT1G20530	-	Bra012234	-	c0001_01593
AT1G20540	Bra025825	-	-	c0001_01594
AT1G20550	Bra025826	-	-	c0001_01595
AT1G20560	Bra025827	-	-	c0001_01596
AT1G20575	Bra025828	Bra012235	-	c0001_01597
AT1G20580	Bra025830	Bra012236	Bra016461	c0001_01598
AT1G20590	Bra025831	-	Bra016460	c0001_01599
AT1G20620	Bra025832	Bra012239	Bra016459	c0001_01600
AT1G20640	Bra025834	Bra012241	Bra016458	c0001_01603
AT1G20650	Bra025835	-	Bra016457	c0001_01604
AT1G20670	Bra025837	Bra012243	Bra016456	c0001_01605
AT1G20680	Bra025813	-	-	c0001_01607
AT1G20700	Bra025839	Bra012245	-	c0001_01609
AT1G20760	Bra025842	Bra012247	Bra016455	c0001_01612
AT1G20770	-	Bra012248	Bra016454	c0001_01613
AT1G20780	-	Bra012249	Bra016453	c0001_01614
AT1G20790	Bra025843	-	Bra016452	c0001_01615
AT1G20810	Bra025844	-	Bra016450	c0001_01616
AT1G20823	Bra025846	Bra012251	Bra016449	c0001_01617
AT1G20830	Bra025847	-	-	c0001_01618
AT1G20840	Bra025848	-	Bra016448	c0001_01619
AT1G20850	Bra025849	Bra012252	Bra016447	c0001_01620
AT1G20870	Bra025851	Bra012253	-	c0001_01621
AT1G20880	Bra025852	Bra012254	Bra016445	c0001_01622
AT1G20890	Bra025853	Bra012255	-	c0001_01623
AT1G20900	Bra025854	Bra012256	Bra016444	c0001_01624
AT1G20910	Bra025855	Bra012257	Bra016443	c0001_01625
AT1G20920	Bra025856	-	-	c0001_01626
AT1G20925	Bra025857	-	-	c0001_01627
AT1G20930	-	Bra012258	-	c0001_01628
AT1G20950	Bra025858	-	Bra016442	c0001_01629
AT1G20960	-	Bra012260	-	c0001_01630
AT1G20970	Bra025862	-	-	c0001_01631
AT1G20980	Bra025863	-	-	c0001_01632
AT1G20990	Bra025864	Bra012261	-	c0001_01633
AT1G21000	Bra025865	Bra012263	Bra016441	c0001_01634
AT1G21010	Bra025866	Bra012264	Bra016439	c0001_01635
AT1G21050	Bra025868	Bra012266	Bra016437	c0001_01636
AT1G21060	Bra025869	-	-	c0001_01637
AT1G21070	Bra025871	-	Bra016435	c0001_01638
AT1G21080	Bra025872	-	Bra016434	c0001_01639
AT1G21090	Bra025873	Bra012267	-	c0001_01640
AT1G21100	Bra025874	Bra012270	Bra016432	c0001_01641
AT1G21140	Bra025879	Bra012271	Bra016431	c0001_01643
AT1G21190	Bra025880	-	-	c0001_01646
AT1G21200	Bra025881	-	Bra016429	c0001_01647
AT1G21210	-	-	Bra016426	c0001_01648
AT1G21310	Bra025889	Bra012274	-	c0001_01650
AT1G21320	Bra025890	Bra012275	-	c0001_01651
AT1G21340	Bra017906	Bra012277	-	c0001_01653
AT1G21350	Bra017907	-	-	c0001_01654
AT1G21360	Bra017908	Bra012278	-	c0001_01655
AT1G21370	Bra017909	-	-	c0001_01656
AT1G21380	Bra017910	Bra012279	Bra016425	c0001_01657
AT1G21390	Bra017911	-	-	c0001_01658
AT1G21400	Bra017912	-	Bra016423	c0001_01659
AT1G21410	-	-	Bra016422	c0001_01660
AT1G21430	Bra017913	-	-	c0001_01661
AT1G21440	Bra017914	-	-	c0001_01662
AT1G21450	Bra017915	Bra012280	-	c0001_01663
AT1G21460	Bra017916	-	Bra016421	c0001_01664
AT1G21480	Bra017918	-	Bra016420	c0001_01665
AT1G21500	Bra017920	Bra012282	-	c0001_01667
AT1G21510	Bra017921	-	-	c0001_01668
AT1G21520	Bra017923	Bra012283	Bra016417	c0001_01670
AT1G21528	Bra017924	Bra012287	-	c0001_01671
AT1G21530	Bra017925	-	-	c0001_01672
AT1G21550	Bra017927	-	-	c0001_01674
AT1G21560	Bra017928	-	-	c0001_01675
AT1G21580	Bra017930	-	-	c0001_01676
AT1G21590	Bra017931	-	Bra016415	c0001_01677
AT1G21600	Bra017932	-	Bra016414	c0001_01678
AT1G21630	Bra017933	Bra012288	Bra016413	c0001_01680
AT1G21640	Bra017934	-	-	c0001_01681
AT1G21650	-	-	Bra016412	c0001_01682
AT1G21660	Bra017937	Bra012290	-	c0001_01684
AT1G21670	Bra017939	-	-	c0001_01685
AT1G21695	Bra017942	Bra012291	-	c0001_01688
AT1G21700	Bra017943	-	Bra016409	c0001_01689
AT1G21720	Bra017945	Bra012292	Bra016408	c0001_01690
AT1G21730	Bra017946	-	-	c0001_01691
AT1G21740	Bra017947	-	-	c0001_01692
AT1G21750	Bra017948	Bra012293	Bra016405	c0001_01693
AT1G21760	Bra017949	-	-	c0001_01694
AT1G21770	Bra017950	-	-	c0001_01695
AT1G21780	Bra017951	-	-	c0001_01696
AT1G21830	Bra017953	Bra012294	Bra016404	c0001_01699
AT1G21840	-	Bra012296	-	c0001_01700
AT1G21870	-	-	Bra016403	c0001_01702
AT1G21890	-	Bra012297	-	c0001_01703
AT1G21900	Bra017957	-	Bra016401	c0001_01704
AT1G21910	Bra036022	Bra012298	Bra016400	c0001_01705
AT1G21920	Bra031352	Bra012299	Bra016399	c0001_01706
AT1G21930	Bra031353	Bra012300	-	c0001_01707
AT1G21940	Bra031354	-	-	c0001_01708
AT1G21970	Bra031356	Bra012301	Bra016397	c0001_01709
AT1G21980	-	-	Bra016396	c0001_01710
AT1G22015	Bra031357	Bra012302	Bra016393	c0001_01712
AT1G22020	Bra031358	-	Bra016392	c0001_01713
AT1G22030	Bra031359	-	Bra016391	c0001_01714
AT1G22040	Bra031360	Bra012304	-	c0001_01715
AT1G22050	Bra031361	Bra012305	-	c0001_01716
AT1G22060	Bra031362	-	Bra016390	c0001_01717
AT1G22065	Bra031363	-	-	c0001_01718
AT1G22070	Bra031364	-	Bra016389	c0001_01719
AT1G22120	Bra031366	Bra012307	-	c0001_01722
AT1G22130	-	Bra012308	Bra016386	c0001_01723
AT1G22150	Bra031368	-	-	c0001_01724
AT1G22160	Bra031369	Bra012309	-	c0001_01725
AT1G22170	-	Bra012310	-	c0001_01726
AT1G22180	Bra031370	Bra012311	-	c0001_01727
AT1G22190	Bra031371	-	-	c0001_01728
AT1G22200	Bra031372	Bra012312	-	c0001_01729
AT1G22220	Bra031373	Bra012314	Bra016384	c0001_01731
AT1G22230	Bra031374	Bra012315	-	c0001_01733
AT1G22240	Bra031375	Bra012316	-	c0001_01734
AT1G22250	Bra031377	Bra012317	-	c0001_01735
AT1G22270	Bra031378	Bra012318	-	c0001_01737
AT1G22280	Bra031382	Bra012319	Bra016383	c0001_01738
AT1G22290	Bra031383	Bra012325	Bra016380	c0001_01739
AT1G22310	-	Bra012320	-	c0001_01740
AT1G22330	Bra031385	Bra012321	-	c0001_01741
AT1G22340	Bra031388	Bra012324	Bra016424	c0001_01743
AT1G22410	Bra031389	-	Bra016381	c0001_01751
AT1G22420	-	Bra012326	Bra016379	c0001_01753
AT1G22430	Bra031390	Bra012327	Bra016378	c0001_01754
AT1G22450	Bra031391	-	-	c0001_01756
AT1G22470	Bra040858	-	-	c0001_01758
AT1G22480	Bra040857	-	-	c0001_01759
AT1G22490	Bra040856	Bra012329	Bra016377	c0001_01760
AT1G22500	Bra040855	Bra012330	-	c0001_01761
AT1G22510	-	Bra012331	-	c0001_01765
AT1G22530	Bra040854	-	-	c0001_01767
AT1G22540	Bra024520	Bra012334	Bra016375	c0001_01769
AT1G22590	Bra024521	Bra012335	-	c0001_01772
AT1G22600	-	Bra012336	-	c0001_01773
AT1G22610	Bra024523	-	-	c0001_01774
AT1G22620	Bra024524	-	Bra016373	c0001_01775
AT1G22640	Bra024526	Bra012337	-	c0001_01777
AT1G22650	Bra024527	-	-	c0001_01778
AT1G22660	Bra024528	Bra012338	-	c0001_01779
AT1G22670	Bra024529	-	-	c0001_01780
AT1G22700	Bra024531	Bra012339	-	c0001_01783
AT1G22730	Bra024534	Bra012343	-	c0001_01785
AT1G22740	-	-	Bra016372	c0001_01786
AT1G22750	Bra024535	-	-	c0001_01787
AT1G22760	-	-	Bra016371	c0001_01788
AT1G22800	Bra024538	Bra012344	-	c0001_01792
AT1G22810	Bra024539	Bra012345	-	c0001_01793
AT1G22830	Bra024540	-	-	c0001_01794
AT1G22840	Bra024541	Bra012346	-	c0001_01795
AT1G22850	Bra024542	Bra012347	-	c0001_01796
AT1G22882	Bra024545	-	-	c0001_01798
AT1G22910	Bra024547	Bra012350	-	c0001_01799
AT1G22920	Bra024548	Bra012351	-	c0001_01800
AT1G22930	Bra024549	-	-	c0001_01801
AT1G22940	Bra024550	-	-	c0001_01802
AT1G22950	Bra024551	-	Bra016368	c0001_01803
AT1G22960	Bra024554	-	-	c0001_01804
AT1G22970	Bra024555	-	-	c0001_01805
AT1G22985	-	Bra012352	Bra016367	c0001_01806
AT1G22990	Bra024556	Bra012353	-	c0001_01807
AT1G23000	Bra024557	-	-	c0001_01808
AT1G23010	Bra024558	-	-	c0001_01809
AT1G23030	Bra024559	Bra012355	-	c0001_01810
AT1G23040	Bra024560	Bra012356	-	c0001_01811
AT1G23050	Bra024561	-	-	c0001_01812
AT1G23060	-	Bra012357	-	c0001_01813
AT1G23080	-	Bra012358	Bra016366	c0001_01814
AT1G23090	Bra024562	Bra012359	-	c0001_01815
AT1G23100	Bra024563	-	-	c0249_00009
AT1G23110	-	Bra012360	-	c0001_01817
AT1G23120	-	-	Bra016361	c0001_01818
AT1G23140	Bra024565	-	-	c0001_01821
AT1G23150	-	-	Bra016360	c0001_01822
AT1G23160	-	-	Bra016359	c0001_01823
AT1G23170	Bra024567	Bra012365	-	c0001_01824
AT1G23180	-	-	Bra016358	c0001_01825
AT1G23190	Bra024568	-	Bra016357	c0001_01826
AT1G23200	Bra024569	-	-	c0001_01827
AT1G23205	Bra024570	Bra012366	-	c0001_01828
AT1G23210	Bra024571	-	-	c0001_01829
AT1G23220	Bra024572	Bra012367	Bra016356	c0001_01830
AT1G23230	Bra024573	Bra012368	-	c0001_01831
AT1G23240	-	Bra012369	-	c0001_01832
AT1G23290	Bra024577	Bra012370	Bra016354	c0001_01833
AT1G23310	Bra024580	Bra012371	Bra016353	c0001_01834
AT1G23320	Bra024585	-	-	c0001_01835
AT1G23330	Bra024588	-	Bra016352	c0001_01837
AT1G23340	Bra024589	-	Bra016351	c0001_01838
AT1G23350	Bra024590	Bra012372	Bra016350	c0001_01839
AT1G23360	-	-	Bra016349	c0001_01840
AT1G23390	Bra024596	-	-	c0001_01843
AT1G23400	Bra024597	-	-	c0001_01844
AT1G23410	Bra024598	-	Bra016346	c0001_01845
AT1G23420	Bra024599	Bra012373	-	c0001_01846
AT1G23440	Bra024600	Bra012374	-	c0001_01847
AT1G23450	Bra024601	-	-	c0001_01848
AT1G23460	Bra024602	Bra012375	Bra016345	c0001_01849
AT1G23500	Bra024605	Bra012377	-	c0001_01850
AT1G23510	Bra024606	-	-	c0001_01851
AT1G23530	Bra024607	Bra012378	Bra016343	c0001_01854
AT1G23540	Bra024608	-	Bra016342	c0001_01855
AT1G23550	Bra024609	Bra012380	-	c0001_01856
AT1G23640	Bra024610	-	-	c0001_01858
AT1G23710	Bra024611	-	-	c0001_01865
AT1G23730	Bra024615	Bra012384	-	c0001_01867
AT1G23740	Bra024616	-	-	c0001_01868
AT1G23750	Bra024617	Bra012386	-	c0001_01869
AT1G23770	-	Bra012387	Bra016332	c0001_01870
AT1G23790	Bra024618	-	Bra016331	c0001_01871
AT1G23820	Bra024620	Bra012389	Bra016329	c0001_01874
AT1G23830	Bra024621	Bra012390	-	c0001_01875
AT1G23860	Bra024624	-	-	c0001_01876
AT1G23870	-	-	Bra016328	c0001_01877
AT1G23880	Bra024626	-	-	c0001_01878
AT1G23965	-	-	Bra016326	c0001_01882
AT1G23980	Bra024628	-	Bra016327	c0001_01881
AT1G24000	Bra024629	Bra012413	-	c0001_01883
AT1G24020	-	Bra012398	-	c0001_01890
AT1G24030	Bra024631	-	-	c0001_01891
AT1G24040	Bra024632	-	-	c0001_01892
AT1G24050	-	Bra012415	-	c0001_01893
AT1G24070	-	Bra012416	-	c0001_01894
AT1G24090	Bra024633	-	-	c0001_01895
AT1G24100	Bra024634	-	-	c0001_01898
AT1G24110	Bra024635	-	-	c0001_01899
AT1G24120	Bra024636	-	Bra016320	c0001_01900
AT1G24130	Bra024637	-	-	c0001_01901
AT1G24140	Bra024638	-	-	c0001_01902
AT1G24145	-	-	Bra016319	c0001_01903
AT1G24150	Bra024640	-	-	c0001_01905
AT1G24160	Bra024641	-	Bra016318	c0001_01906
AT1G24170	Bra024642	-	-	c0001_01907
AT1G24180	Bra024643	-	-	c0001_01908
AT1G24260	Bra032814	Bra030032	Bra010955	c0001_02094
AT1G24270	Bra032810	-	Bra010957	c0001_02092
AT1G24280	-	Bra030031	Bra010958	c0001_02091
AT1G24290	-	Bra030030	-	c0001_02090
AT1G24310	-	-	Bra010959	c0001_02088
AT1G24320	-	Bra030029	-	c0001_02087
AT1G24330	-	Bra030028	Bra010960	c0001_02086
AT1G24340	-	Bra030027	-	c0001_02085
AT1G24350	Bra032809	Bra030026	Bra010961	c0001_02084
AT1G24360	Bra032808	Bra030025	Bra010962	c0001_02083
AT1G24400	Bra032807	Bra030024	-	c0001_02082
AT1G24405	Bra032806	-	-	c0001_02081
AT1G24420	Bra032805	-	-	c0001_02079
AT1G24440	Bra032804	Bra012512	Bra010963	c0001_02078
AT1G24460	Bra032802	-	Bra010964	c0001_02077
AT1G24470	Bra032801	Bra012511	-	c0001_02076
AT1G24480	-	Bra012510	-	c0001_02075
AT1G24485	-	Bra012509	-	c0001_02074
AT1G24490	Bra032799	Bra012507	-	c0001_02072
AT1G24510	Bra032797	Bra012506	Bra010965	c0001_02071
AT1G24520	Bra032796	Bra012505	Bra010966	c0001_02070
AT1G24530	Bra032795	Bra012504	Bra010967	c0001_02069
AT1G24540	Bra032794	-	-	c0001_02068
AT1G24560	-	-	Bra010968	c0001_02066
AT1G24570	Bra032792	Bra012501	-	c0001_02065
AT1G24575	Bra032790	-	Bra010970	c0001_02063
AT1G24577	-	-	Bra010971	c0001_02062
AT1G24580	-	-	Bra010969	c0001_02064
AT1G24590	-	Bra012499	Bra010972	c0001_02061
AT1G24600	-	Bra012498	Bra010973	c0001_02060
AT1G24610	Bra032788	-	-	c0001_02059
AT1G24620	Bra032785	Bra012497	Bra010974	c0001_02058
AT1G24625	-	Bra012496	Bra010975	c0001_02057
AT1G24650	-	Bra012495	-	c0001_02056
AT1G24706	-	-	Bra010976	c0001_02054
AT1G24735	-	Bra012494	Bra010977	c0001_02053
AT1G24764	Bra032784	Bra012493	Bra010978	c0001_02052
AT1G25220	Bra032783	-	Bra010980	c0001_02050
AT1G25230	-	Bra012492	-	c0001_02049
AT1G25240	Bra024772	Bra012491	-	c0001_02048
AT1G25250	Bra024771	-	Bra010981	c0001_02047
AT1G25260	Bra024770	Bra012490	Bra010982	c0001_02046
AT1G25270	Bra024767	Bra012488	-	c0001_02042
AT1G25275	Bra024765	Bra012487	Bra010984	c0001_02041
AT1G25300	-	-	Bra010988	c0001_02037
AT1G25320	Bra024761	-	Bra010990	c0001_02035
AT1G25330	-	-	Bra010993	c0001_02034
AT1G25340	Bra024760	Bra012482	-	c0001_02032
AT1G25350	Bra024759	-	-	c0001_02031
AT1G25360	-	-	Bra010992	c0001_02030
AT1G25370	Bra024758	Bra012481	Bra010991	c0001_02029
AT1G25380	Bra024756	-	Bra010989	c0001_02028
AT1G25390	Bra024755	Bra012480	-	c0001_02027
AT1G25400	-	Bra012479	-	c0001_02026
AT1G25420	-	Bra012478	-	c0001_02024
AT1G25422	Bra024753	Bra012477	-	c0001_02023
AT1G25425	Bra024751	Bra012476	-	c0001_02022
AT1G25440	Bra024750	Bra012475	Bra010994	c0001_02021
AT1G25450	Bra024749	-	-	c0001_02020
AT1G25460	Bra024747	-	-	c0001_02019
AT1G25470	Bra024743	-	-	c0001_02018
AT1G25480	Bra024742	-	Bra010995	c0001_02017
AT1G25490	Bra024741	Bra012474	Bra010996	c0001_02016
AT1G25500	-	-	Bra010997	c0001_02015
AT1G25510	-	Bra012473	Bra010998	c0001_02014
AT1G25520	Bra024740	Bra012472	Bra010999	c0001_02013
AT1G25530	Bra024738	-	Bra011000	c0001_02012
AT1G25540	Bra024737	-	Bra011001	c0001_02011
AT1G25550	-	Bra012471	-	c0001_02010
AT1G25560	Bra024735	-	Bra011002	c0001_02009
AT1G25570	Bra024734	-	-	c0001_02008
AT1G25682	Bra024732	-	Bra011006	c0001_02005
AT1G26090	-	-	Bra011007	c0001_02004
AT1G26100	-	-	Bra011008	c0308_00004
AT1G26110	-	Bra012470	Bra011009	c0001_02003
AT1G26120	Bra024729	-	Bra011010	c0001_02001
AT1G26130	-	Bra012469	-	c0001_02000
AT1G26140	Bra024728	-	Bra011011	c0001_01999
AT1G26180	-	-	Bra011013	c0001_01997
AT1G26190	-	Bra012464	Bra011014	c0001_01996
AT1G26200	-	-	Bra011015	c0001_01995
AT1G26210	-	Bra012463	Bra011017	c0001_01994
AT1G26220	-	-	Bra011018	c0001_01993
AT1G26230	-	Bra012462	-	c0001_01992
AT1G26270	Bra024724	-	Bra011020	c0001_01989
AT1G26310	-	-	Bra011021	c0001_01987
AT1G26320	Bra024723	-	-	c0001_01986
AT1G26340	Bra024721	-	-	c0001_01985
AT1G26360	-	-	Bra011022	c0001_01983
AT1G26370	Bra024720	-	Bra011023	c0001_01982
AT1G26380	Bra024719	-	Bra016272	c0001_01980
AT1G26440	Bra024716	-	-	c0001_01979
AT1G26450	-	Bra012458	-	c0001_01978
AT1G26470	Bra024714	Bra012456	-	c0001_01977
AT1G26480	Bra024713	Bra012455	Bra016273	c0001_01976
AT1G26500	Bra024712	-	-	c0001_01975
AT1G26520	Bra024711	-	-	c0001_01974
AT1G26550	Bra024710	-	Bra016275	c0001_01973
AT1G26560	Bra024709	-	Bra016276	c0001_01972
AT1G26570	Bra024708	-	-	c0001_01971
AT1G26590	Bra024706	Bra012452	Bra016278	c0001_01969
AT1G26620	Bra024703	Bra012449	Bra016281	c0001_01968
AT1G26630	Bra024702	-	Bra016282	c0001_01967
AT1G26640	Bra024701	-	-	c0001_01966
AT1G26680	Bra024697	Bra012445	-	c0001_01963
AT1G26690	Bra024694	-	Bra016283	c0001_01962
AT1G26700	Bra024693	-	-	c0001_01961
AT1G26730	Bra024691	-	Bra016284	c0001_01959
AT1G26740	Bra024690	Bra012444	-	c0001_01958
AT1G26750	Bra024689	Bra012443	-	c0001_01957
AT1G26770	Bra024686	-	-	c0001_01955
AT1G26780	Bra024685	-	Bra016285	c0001_01954
AT1G26790	Bra024683	-	Bra016286	c0001_01953
AT1G26795	-	-	Bra016288	c0001_01952
AT1G26800	Bra024682	Bra012441	Bra016290	c0315_00005
AT1G26810	-	Bra012440	-	c0001_01951
AT1G26820	-	Bra012439	-	c0001_01950
AT1G26830	Bra024680	-	Bra016291	c0001_01949
AT1G26840	Bra024679	-	Bra016292	c0001_01948
AT1G26850	Bra024678	Bra012437	Bra016293	c0001_01946
AT1G26870	Bra024677	-	Bra016294	c0001_01944
AT1G26880	-	-	Bra016295	c0277_00007
AT1G26920	Bra024675	-	Bra016296	c0001_01941
AT1G26930	-	-	Bra016297	c0001_01940
AT1G26940	Bra024674	-	Bra016298	c0001_01939
AT1G26945	Bra024672	Bra012435	Bra016299	c0001_01938
AT1G26960	-	-	Bra016300	c0001_01937
AT1G26970	Bra024725	-	Bra016301	c0001_01935
AT1G27000	Bra024667	-	Bra016302	c0151_00001
AT1G27020	Bra024666	Bra012433	Bra016303	c0001_01932
AT1G27040	-	Bra012431	Bra011003	c0001_01930
AT1G27050	Bra024665	Bra012430	-	c0001_01929
AT1G27060	Bra024664	-	Bra016304	c0001_01927
AT1G27070	Bra024663	-	-	c0001_01926
AT1G27090	-	Bra012428	Bra016305	c0001_01924
AT1G27100	Bra024662	Bra012427	Bra016306	c0001_01923
AT1G27110	-	Bra012421	Bra016307	c0001_01922
AT1G27120	Bra024660	Bra012423	Bra016308	c0001_01920
AT1G27130	Bra024659	Bra012409	-	c0001_01919
AT1G27150	Bra024658	Bra012411	-	c0001_01917
AT1G27170	Bra024652	-	Bra016312	c0001_01914
AT1G27190	Bra024650	-	-	c0001_01913
AT1G27200	Bra024649	-	Bra016315	c0001_01912
AT1G27210	Bra024646	-	Bra016316	c0001_01911
AT1G27220	-	Bra012419	-	c0001_01910
AT1G27300	Bra032817	Bra030034	-	c0001_02096
AT1G27310	Bra032818	Bra030035	Bra010953	c0001_02097
AT1G27320	-	Bra030037	-	c0001_02098
AT1G27340	Bra032820	Bra030038	-	c0001_02099
AT1G27360	Bra032823	Bra030041	Bra010949	c0001_02100
AT1G27385	Bra032825	Bra030043	-	c0001_02102
AT1G27390	Bra032826	Bra030044	Bra010946	c0001_02103
AT1G27400	Bra032828	-	Bra010943	c0001_02105
AT1G27420	-	Bra030046	Bra010942	c0001_02106
AT1G27430	-	-	Bra010950	c0001_02107
AT1G27435	-	Bra030050	Bra010941	c0001_02108
AT1G27440	-	Bra030051	Bra010940	c0001_02109
AT1G27461	Bra032830	-	Bra010935	c0001_02111
AT1G27470	Bra032831	-	Bra010934	c0001_02112
AT1G27480	-	Bra030052	-	c0001_02113
AT1G27500	Bra032832	-	-	c0001_02114
AT1G27510	-	-	Bra010933	c0001_02115
AT1G27520	Bra032833	-	-	c0001_02116
AT1G27530	-	Bra030054	Bra010932	c0001_02117
AT1G27600	Bra032835	Bra030055	Bra010929	c0001_02119
AT1G27620	Bra032837	-	Bra010928	c0001_02120
AT1G27630	-	Bra030056	Bra010927	c0001_02121
AT1G27650	-	Bra030057	Bra010926	c0001_02122
AT1G27660	-	-	Bra010925	c0001_02123
AT1G27670	Bra032840	-	-	c0001_02124
AT1G27680	Bra032842	-	-	c0001_02125
AT1G27690	-	-	Bra010924	c0001_02127
AT1G27700	-	Bra030059	Bra010923	c0001_02129
AT1G27710	Bra032844	Bra030060	-	c0001_02130
AT1G27720	-	Bra030061	-	c0001_02131
AT1G27730	Bra032845	-	Bra010922	c0001_02132
AT1G27740	Bra032846	Bra030063	Bra010921	c0001_02133
AT1G27770	-	-	Bra010917	c0001_02135
AT1G27840	Bra032850	-	-	c0001_02137
AT1G27850	Bra032851	-	Bra010916	c0001_02138
AT1G27880	-	Bra030065	-	c0001_02139
AT1G27900	-	-	Bra010915	c0001_02140
AT1G27910	Bra032852	-	Bra010914	c0001_02141
AT1G27920	Bra032853	-	-	c0001_02142
AT1G27930	Bra032854	Bra030066	-	c0001_02143
AT1G27950	Bra032857	Bra030067	Bra010912	c0001_02145
AT1G27960	-	-	Bra010911	c0001_02146
AT1G27990	Bra032861	-	-	c0001_02148
AT1G28010	Bra032864	-	-	c0001_02149
AT1G28050	-	Bra030070	Bra010908	c0001_02152
AT1G28060	Bra032868	-	Bra010907	c0001_02153
AT1G28070	Bra032869	Bra030071	Bra010906	c0001_02154
AT1G28080	Bra032870	-	Bra010904	c0001_02155
AT1G28090	Bra032873	-	-	c0001_02156
AT1G28100	Bra032874	Bra030072	-	c0001_02158
AT1G28110	Bra032875	-	Bra010903	c0001_02159
AT1G28120	-	Bra030073	Bra010902	c0001_02160
AT1G28130	Bra032876	Bra030074	-	c0001_02161
AT1G28140	Bra032878	-	-	c0001_02162
AT1G28150	Bra032879	Bra030075	-	c0001_02163
AT1G28160	Bra032881	Bra030076	Bra010901	c0001_02164
AT1G28170	-	-	Bra010899	c0001_02165
AT1G28190	Bra032882	-	Bra010898	c0001_02167
AT1G28200	-	-	Bra010897	c0001_02168
AT1G28210	-	-	Bra010892	c0001_02169
AT1G28220	-	Bra030078	Bra010890	c0001_02170
AT1G28240	Bra032885	Bra030079	Bra010889	c0001_02173
AT1G28250	Bra032886	-	Bra010888	c0001_02174
AT1G28260	Bra032887	-	Bra010887	c0001_02175
AT1G28270	Bra032888	Bra030081	Bra010886	c0001_02176
AT1G28280	-	Bra030082	Bra010885	c0001_02177
AT1G28290	Bra032889	-	-	c0001_02178
AT1G28300	Bra032890	Bra030087	-	c0001_02181
AT1G28310	Bra032891	Bra030089	Bra010884	c0001_02182
AT1G28320	Bra032893	-	-	c0001_02183
AT1G28330	Bra032894	-	-	c0001_02186
AT1G28340	Bra032897	-	-	c0001_02187
AT1G28350	-	Bra030092	Bra010883	c0001_02188
AT1G28360	Bra032901	Bra030095	Bra010880	c0001_02189
AT1G28380	Bra032902	-	Bra010879	c0001_02193
AT1G28390	-	-	Bra010878	c0001_02195
AT1G28395	Bra032905	-	Bra010877	c0001_02196
AT1G28400	Bra032906	-	Bra010876	c0001_02197
AT1G28410	Bra032907	-	-	c0001_02198
AT1G28420	Bra032908	Bra030097	Bra010869	c0120_00007
AT1G28440	Bra032909	Bra030098	Bra010867	c0120_00006
AT1G28470	Bra032910	Bra030099	-	c0120_00005
AT1G28480	Bra032911	Bra030102	-	c0120_00003
AT1G28490	Bra032912	-	Bra010866	c0120_00002
AT1G28510	-	Bra030103	Bra010865	c0120_00001
AT1G28520	Bra032913	-	Bra010864	c0001_02206
AT1G28530	-	-	Bra010863	c0001_02207
AT1G28540	-	Bra030104	Bra010861	c0001_02208
AT1G28550	Bra032914	Bra030105	Bra010860	c0001_02209
AT1G28560	-	-	Bra010859	c0001_02210
AT1G28570	Bra032917	Bra030108	-	c0001_02211
AT1G28640	-	Bra030111	Bra010857	c0337_00003
AT1G28680	Bra032918	-	-	c0001_02218
AT1G28690	-	-	Bra010856	c0001_02219
AT1G28960	-	-	Bra010854	c0001_02221
AT1G29000	-	Bra030113	-	c0001_02222
AT1G29010	Bra032924	-	-	c0001_02223
AT1G29020	Bra032925	-	-	c0001_02224
AT1G29041	-	Bra030115	-	c0001_02226
AT1G29050	-	Bra030116	-	c0001_02227
AT1G29060	-	Bra030117	Bra010853	c0164_00003
AT1G29070	-	-	Bra010852	c0164_00002
AT1G29080	-	Bra030118	-	c0001_02229
AT1G29100	-	Bra030119	-	c0001_02232
AT1G29120	-	Bra030121	Bra010851	c0001_02233
AT1G29140	Bra032290	Bra030122	Bra010850	c0001_02234
AT1G29150	Bra032291	-	Bra010849	c0001_02235
AT1G29160	Bra032292	Bra030124	Bra010848	c0001_02236
AT1G29170	-	-	Bra010847	c0001_02237
AT1G29195	-	Bra030125	Bra010845	c0001_02238
AT1G29200	Bra032298	Bra030130	-	c0001_02244
AT1G29220	Bra032297	-	-	c0001_02243
AT1G29230	-	-	Bra010841	c0001_02242
AT1G29240	-	Bra030129	Bra010842	c0001_02241
AT1G29250	Bra032296	Bra030127	Bra010843	c0001_02240
AT1G29260	Bra032295	-	Bra010844	c0001_02239
AT1G29270	-	Bra030132	-	c0001_02246
AT1G29280	Bra032300	-	Bra010839	c0001_02247
AT1G29290	Bra032301	Bra030133	Bra010838	c0001_02248
AT1G29300	Bra032302	-	Bra010837	c0001_02250
AT1G29310	Bra032303	-	-	c0001_02251
AT1G29320	Bra032305	-	Bra010836	c0001_02252
AT1G29340	Bra032309	-	Bra010834	c0001_02253
AT1G29370	Bra032310	Bra030134	Bra010832	c0001_02254
AT1G29380	Bra032314	-	Bra010831	c0001_02255
AT1G29390	Bra032315	-	-	c0001_02256
AT1G29400	Bra032316	Bra030135	-	c0001_02257
AT1G29420	Bra032317	-	-	c0001_02259
AT1G29470	Bra032319	Bra030140	Bra010830	c0001_02263
AT1G29480	Bra032318	Bra030138	-	c0001_02262
AT1G29490	Bra032322	-	Bra010826	c0001_02264
AT1G29520	Bra032323	Bra030142	Bra010825	c0001_02269
AT1G29530	Bra032324	Bra030143	Bra010824	c0001_02270
AT1G29540	-	Bra030144	-	c0001_02271
AT1G29590	Bra032325	-	-	c0001_02272
AT1G29600	Bra032328	-	-	c0001_02273
AT1G29640	Bra032329	Bra030154	Bra010823	c0001_02275
AT1G29660	-	Bra030156	Bra010820	c0001_02276
AT1G29680	Bra032330	-	-	c0001_02278
AT1G29690	-	Bra030157	Bra010819	c0001_02279
AT1G29700	-	-	Bra010818	c0001_02280
AT1G29724	-	Bra030174	-	c0001_02281
AT1G29760	Bra032334	-	Bra010814	c0001_02286
AT1G29770	Bra032335	Bra030172	Bra010812	c0001_02287
AT1G29790	Bra032336	-	Bra010810	c0001_02290
AT1G29800	Bra032337	-	-	c0001_02291
AT1G29810	Bra032338	-	Bra010809	c0001_02292
AT1G29820	-	-	Bra010808	c0001_02294
AT1G29860	Bra032340	Bra030178	-	c0001_02295
AT1G29900	Bra032344	-	-	c0001_02298
AT1G29910	Bra032345	Bra030182	Bra010807	c1000_00001
AT1G29940	-	Bra030180	-	c0001_02299
AT1G29950	-	Bra030184	Bra010806	c0001_02300
AT1G29962	Bra032347	-	-	c0001_02302
AT1G29965	-	-	Bra010805	c0001_02303
AT1G29980	Bra032349	-	-	c0001_02304
AT1G29990	Bra032350	Bra030185	-	c0001_02305
AT1G30000	Bra032351	-	Bra010804	c0001_02306
AT1G30010	Bra032352	-	-	c0001_02307
AT1G30020	-	-	Bra010803	c0001_02308
AT1G30040	Bra032354	Bra030187	Bra010802	c0001_02309
AT1G30050	Bra032355	-	Bra010801	c0001_02310
AT1G30070	Bra032356	-	-	c0001_02311
AT1G30080	Bra032357	-	Bra010800	c0001_02312
AT1G30090	Bra032358	-	-	c0001_02313
AT1G30100	Bra032359	-	-	c0001_02314
AT1G30110	Bra032360	Bra030188	Bra010797	c0001_02315
AT1G30120	Bra032361	-	Bra010796	c0001_02316
AT1G30130	-	-	Bra010795	c0001_02318
AT1G30135	Bra032362	-	Bra010794	c0001_02319
AT1G30190	Bra032363	Bra030189	-	c0001_02320
AT1G30200	Bra032364	-	-	c0001_02321
AT1G30210	Bra032365	-	Bra010789	c0001_02322
AT1G30220	-	-	Bra010788	c0001_02323
AT1G30230	Bra032367	-	Bra010787	c0001_02324
AT1G30240	Bra032368	-	Bra010786	c0001_02326
AT1G30250	Bra032370	-	Bra010785	c0001_02327
AT1G30260	Bra032371	Bra014874	-	c0001_02328
AT1G30270	Bra032374	Bra014875	Bra010783	c0001_02329
AT1G30280	Bra032375	Bra014876	Bra010780	c0001_02330
AT1G30290	Bra032378	Bra030139	-	c0001_02331
AT1G30300	Bra032379	-	Bra010779	c0001_02333
AT1G30320	Bra032380	-	Bra010777	c0001_02335
AT1G30330	-	-	Bra010776	c0001_02336
AT1G30360	Bra032382	-	Bra010775	c0001_02337
AT1G30370	Bra032383	Bra014877	-	c0001_02338
AT1G30380	Bra032384	-	Bra010774	c0001_02339
AT1G30400	Bra032386	Bra014879	Bra010773	c0001_02340
AT1G30440	Bra032391	-	Bra010771	c0001_02356
AT1G30450	-	Bra014880	Bra010770	c0001_02343
AT1G30460	-	Bra014881	Bra010769	c0001_02344
AT1G30470	Bra032392	Bra014882	Bra010766	c0001_02345
AT1G30475	-	Bra014883	Bra010765	c0001_02346
AT1G30480	Bra032393	-	Bra010764	c0001_02347
AT1G30490	Bra032394	-	-	c0001_02348
AT1G30500	Bra032395	-	-	c0001_02349
AT1G30510	Bra032396	-	-	c0001_02350
AT1G30520	Bra032398	-	-	c0001_02351
AT1G30560	-	-	Bra039863	c0001_02358
AT1G30570	Bra032404	-	-	c0001_02360
AT1G30580	Bra032405	-	Bra039865	c0001_02361
AT1G30600	Bra032407	-	-	c0001_02362
AT1G30610	Bra032408	-	-	c0001_02363
AT1G30620	Bra032409	-	-	c0001_02364
AT1G30630	Bra032410	-	-	c0001_02365
AT1G30640	Bra032411	-	Bra010763	c0001_02366
AT1G30660	Bra023117	-	-	c0001_02370
AT1G30690	Bra023118	-	-	c0001_02371
AT1G30700	Bra023127	Bra014886	-	c0001_02372
AT1G30755	Bra023130	-	-	c0001_02377
AT1G30760	Bra023131	Bra014890	-	c0001_02378
AT1G30780	Bra023135	Bra014878	-	c0001_02380
AT1G30800	-	-	Bra039868	c0001_02381
AT1G30810	Bra023136	-	Bra039869	c0001_02382
AT1G30825	Bra023140	Bra014893	-	c0001_02384
AT1G30840	Bra023141	-	-	c0001_02385
AT1G30850	Bra023146	Bra014894	Bra039870	c0001_02386
AT1G30860	Bra023148	-	Bra039871	c0001_02387
AT1G30870	Bra023149	Bra014895	Bra039872	c0001_02388
AT1G30880	Bra023150	Bra014896	Bra039873	c0001_02389
AT1G30890	-	-	Bra039874	c0001_02390
AT1G30900	Bra023151	-	Bra039877	c0001_02391
AT1G30950	-	-	Bra039878	c0001_02392
AT1G30960	Bra023152	Bra014897	Bra039879	c0001_02393
AT1G30970	Bra023153	-	Bra039880	c0001_02394
AT1G31010	Bra023154	-	-	c0001_02397
AT1G31040	Bra023155	Bra014899	Bra038403	c0001_02399
AT1G31070	Bra023160	-	Bra038405	c0001_02401
AT1G31120	-	Bra014902	Bra038410	c0001_02405
AT1G31130	Bra023161	Bra014903	Bra038411	c0001_02406
AT1G31140	Bra023162	-	-	c0001_02407
AT1G31160	-	Bra014904	-	c0001_02408
AT1G31170	-	-	Bra038412	c0001_02409
AT1G31175	Bra023164	-	-	c0458_00007
AT1G31190	Bra023165	-	-	c0458_00006
AT1G31200	Bra023166	-	-	c0001_02411
AT1G31220	Bra023168	-	-	c0001_02412
AT1G31230	Bra023169	-	-	c0001_02413
AT1G31240	Bra023170	-	-	c0001_02414
AT1G31260	Bra023171	-	Bra038416	c0001_02415
AT1G31280	Bra023172	-	-	c0001_02419
AT1G31300	Bra023174	Bra014905	-	c0001_02421
AT1G31310	Bra023175	Bra014906	-	c0001_02422
AT1G31320	-	Bra014907	-	c0001_02424
AT1G31335	Bra023177	Bra014909	-	c0001_02426
AT1G31350	Bra023181	-	Bra038419	c0001_02428
AT1G31360	-	-	Bra038422	c0001_02429
AT1G31410	-	Bra014910	-	c0001_02430
AT1G31420	Bra035523	-	-	c0001_02431
AT1G31460	Bra023188	-	-	c0001_02433
AT1G31470	Bra023189	-	-	c0001_02434
AT1G31480	Bra023190	-	Bra038425	c0001_02435
AT1G31490	Bra023191	-	-	c0001_02436
AT1G31650	Bra023198	-	Bra038429	c0001_02439
AT1G31660	-	Bra014911	-	c0001_02440
AT1G31670	-	Bra014912	Bra038430	c0001_02442
AT1G31720	-	-	Bra038434	c0001_02443
AT1G31730	Bra023199	-	-	c0001_02446
AT1G31760	Bra023201	Bra033879	-	c0001_02449
AT1G31770	Bra023202	Bra033878	-	c0001_02450
AT1G31780	Bra023203	-	-	c0001_02451
AT1G31790	-	Bra033876	-	c0001_02452
AT1G31800	-	-	Bra038413	c0001_02453
AT1G31812	Bra023206	Bra033875	Bra038439	c0001_02454
AT1G31850	Bra023213	Bra033872	-	c0001_02457
AT1G31860	Bra023217	Bra033871	-	c0001_02459
AT1G31870	-	Bra033870	-	c0001_02460
AT1G31885	-	Bra033867	Bra035520	c0001_02463
AT1G31910	-	-	Bra035519	c0001_02464
AT1G31920	-	Bra033866	-	c0001_02465
AT1G31930	Bra023220	Bra033865	-	c0001_02466
[truncated: 14,064 more rows]

## Sheet: colinearity in 4 species
genes in A. lyrata	genes in A. thaliana	genes in LF of B. rapa	genes in MF1 of B. rapa	genes in MF2 of B. rapa	genes in T. parvula
fgenesh1_pg.C_scaffold_1000119	AT1G01010	Bra033296	-	-	c0001_00108
fgenesh2_kg.1__135__AT1G01020.1	AT1G01020	Bra033295	-	-	c0001_00107
fgenesh2_kg.1__134__AT1G01030.1	AT1G01030	Bra033294	-	-	c0001_00106
fgenesh1_pg.C_scaffold_1000116	AT1G01040	Bra033293	-	-	c0001_00105
Al_scaffold_0001_128	AT1G01050	Bra033292	Bra032616	-	c0001_00104
scaffold_100145.1	AT1G01070	Bra033290	Bra032617	-	c0001_00101
Al_scaffold_0001_125	AT1G01080	Bra033287	-	-	c0001_00100
fgenesh2_kg.1__125__AT1G01090.1	AT1G01090	Bra033286	Bra032619	-	c0001_00099
fgenesh1_pm.C_scaffold_1000104	AT1G01100	Bra033285	Bra032620	-	c0001_00098
fgenesh1_pg.C_scaffold_1000109	AT1G01110	Bra033284	-	-	c0001_00097
scaffold_100139.1	AT1G01120	Bra033283	Bra032621	-	c0001_00096
fgenesh2_kg.1__115__AT1G01140.3	AT1G01140	Bra033282	Bra032622	-	c0001_00095
scaffold_100135.1	AT1G01160	Bra033281	Bra032623	-	c0001_00094
fgenesh1_pm.C_scaffold_1000097	AT1G01170	Bra033280	-	-	c0001_00093
Al_scaffold_0001_114	AT1G01180	Bra033279	-	-	c0001_00092
fgenesh1_pm.C_scaffold_1000095	AT1G01190	Bra033278	Bra032624	-	c0001_00091
fgenesh2_kg.1__110__AT1G01200.1	AT1G01200	Bra033277	-	-	c0001_00090
fgenesh1_pm.C_scaffold_1000093	AT1G01210	-	Bra032625	-	c0001_00089
fgenesh2_kg.1__109__AT1G01220.1	AT1G01220	-	Bra032626	-	c0001_00088
fgenesh2_kg.1__103__AT1G01250.1	AT1G01250	Bra033274	Bra032630	-	c0001_00087
fgenesh2_kg.1__101__AT1G01260.1	AT1G01260	Bra033273	-	-	c0001_00086
fgenesh1_pm.C_scaffold_1000085	AT1G01290	-	Bra032632	-	c0001_00085
fgenesh2_kg.1__99__AT1G01300.1	AT1G01300	Bra033271	-	-	c0001_00084
fgenesh2_kg.1__97__AT1G01310.1	AT1G01310	Bra033270	Bra032633	-	c0001_00083
fgenesh2_kg.1__96__AT1G01320.1	AT1G01320	Bra033269	-	-	c0001_00082
Al_scaffold_0001_94	AT1G01360	Bra033267	-	-	c0001_00079
Al_scaffold_0001_93	AT1G01370	-	Bra032634	-	c0001_00078
Al_scaffold_0001_92	AT1G01380	-	Bra032635	-	c0001_00077
fgenesh2_kg.1__92__AT1G01420.1	AT1G01420	Bra033266	-	-	c0001_00075
scaffold_100104.1	AT1G01440	Bra033264	-	-	c0001_00074
fgenesh1_pm.C_scaffold_1000070	AT1G01460	Bra033262	-	-	c0001_00072
fgenesh1_pg.C_scaffold_1000073	AT1G01470	-	-	Bra030494	c0001_00071
scaffold_100096.1	AT1G01480	Bra033261	-	-	c0001_00070
scaffold_100095.1	AT1G01490	Bra033260	Bra032637	-	c0001_00069
fgenesh1_pm.C_scaffold_1000066	AT1G01500	Bra033259	Bra032638	-	c0001_00068
fgenesh2_kg.1__79__AT1G01540.2	AT1G01540	Bra037952	Bra032639	-	c0001_00066
fgenesh2_kg.1__78__AT1G01550.1	AT1G01550	Bra033254	-	-	c0001_00065
Al_scaffold_0001_70	AT1G01570	Bra033253	-	-	c0001_00063
Al_scaffold_0001_67	AT1G01580	Bra037953	Bra032640	-	c0001_00061
scaffold_100080.1	AT1G01600	Bra033251	Bra032642	-	c0001_00060
scaffold_100079.1	AT1G01610	Bra033249	Bra032643	-	c0001_00059
fgenesh2_kg.1__69__AT1G01620.1	AT1G01620	Bra033248	Bra032644	-	c0001_00058
fgenesh2_kg.1__67__AT1G01630.1	AT1G01630	Bra033247	Bra032645	-	c0001_00057
scaffold_100076.1	AT1G01640	Bra033246	-	-	c0001_00056
fgenesh2_kg.1__64__AT1G01650.1	AT1G01650	Bra033245	Bra032646	-	c0001_00055
Al_scaffold_0001_58	AT1G01660	Bra033244	-	-	c0001_00052
Al_scaffold_0001_57	AT1G01690	Bra033241	-	-	c0001_00051
fgenesh2_kg.1__58__AT1G01710.1	AT1G01710	Bra033240	-	-	c0001_00050
scaffold_100066.1	AT1G01720	Bra033239	Bra032615	-	c0001_00049
fgenesh2_kg.1__55__AT1G01730.1	AT1G01730	-	Bra032648	-	c0001_00048
scaffold_100061.1	AT1G01750	Bra033236	-	-	c0001_00046
Al_scaffold_0001_50	AT1G01760	Bra033235	-	-	c0001_00045
fgenesh2_kg.1__52__AT1G01770.1	AT1G01770	-	Bra032649	-	c0001_00044
scaffold_100058.1	AT1G01780	Bra033233	Bra032650	-	c0001_00043
fgenesh1_pm.C_scaffold_1000043	AT1G01790	Bra033232	Bra032651	-	c0001_00041
scaffold_100056.1	AT1G01800	Bra033230	Bra032573	-	c0001_00040
fgenesh2_kg.1__46__AT1G01830.3	AT1G01830	Bra033229	-	-	c0001_00037
scaffold_100051.1	AT1G01840	Bra033227	-	-	c0001_00036
fgenesh1_pm.C_scaffold_1000036	AT1G01880	-	Bra032653	-	c0001_00035
Al_scaffold_0001_39	AT1G01900	Bra033226	-	-	c0001_00034
fgenesh2_kg.1__42__AT1G01910.4	AT1G01910	-	Bra032654	-	c0001_00032
fgenesh2_kg.1__37__AT1G01920.2	AT1G01920	-	Bra032655	-	c0001_00031
fgenesh2_kg.1__35__AT1G01930.1	AT1G01930	-	Bra032656	-	c0001_00030
fgenesh1_pg.C_scaffold_1000030	AT1G01940	-	Bra032657	-	c0001_00029
fgenesh2_kg.1__33__AT1G01950.1	AT1G01950	-	Bra032658	-	c0001_00028
fgenesh2_kg.1__32__AT1G01960.1	AT1G01960	-	Bra032659	-	c0001_00027
fgenesh2_kg.1__31__AT1G01970.1	AT1G01970	Bra033224	-	-	c0001_00026
fgenesh2_kg.1__29__AT1G01990.1	AT1G01990	Bra033223	-	-	c0001_00024
fgenesh2_kg.1__28__AT1G02010.1	AT1G02010	-	Bra032660	-	c0001_00023
fgenesh1_pg.C_scaffold_1000018	AT1G02040	Bra033220	Bra032661	-	c0001_00021
fgenesh2_kg.1__23__AT1G02065.1	AT1G02065	Bra033221	Bra032662	-	c0001_00018
fgenesh2_kg.1__20__AT1G02070.1	AT1G02070	-	Bra032663	-	c0001_00017
scaffold_100023.1	AT1G02080	Bra033222	Bra032664	-	c0001_00016
fgenesh2_kg.1__19__AT1G02090.1	AT1G02090	Bra033219	Bra032666	-	c0001_00014
scaffold_100009.1	AT1G02140	Bra033217	Bra032668	-	c0001_00009
scaffold_100007.1	AT1G02150	Bra033215	-	-	c0001_00008
fgenesh2_kg.1__3__AT1G02180.1	AT1G02180	Bra033213	-	-	c0001_00006
scaffold_100001.1	AT1G02190	-	Bra032670	-	c0001_00004
scaffold_100153.1	AT1G02220	Bra033308	-	-	c0154_00017
fgenesh2_kg.1__141__AT1G02260.1	AT1G02260	-	Bra032614	-	c0154_00016
fgenesh2_kg.1__142__AT1G02270.1	AT1G02270	Bra033309	Bra032613	-	c0154_00015
fgenesh1_pm.C_scaffold_1000118	AT1G02280	Bra033311	Bra032612	-	c0154_00013
scaffold_100161.1	AT1G02300	-	-	Bra030498	c0154_00011
fgenesh2_kg.1__146__AT1G02310.1	AT1G02310	Bra033312	-	-	c0154_00009
scaffold_100164.1	AT1G02330	Bra033313	-	-	c0154_00007
fgenesh2_kg.1__148__AT1G02335.1	AT1G02335	Bra033314	-	-	c0154_00006
fgenesh1_pg.C_scaffold_1000130	AT1G02340	Bra033315	Bra032610	-	c0154_00005
fgenesh2_kg.1__150__AT1G02370.1	AT1G02370	Bra033321	-	-	c0154_00003
scaffold_100172.1	AT1G02380	-	Bra032607	-	c0001_00121
fgenesh2_kg.1__152__AT1G02390.1	AT1G02390	Bra033323	-	-	c0001_00122
Al_scaffold_0001_155	AT1G02400	Bra033324	-	Bra030500	c0001_00123
scaffold_100176.1	AT1G02410	Bra033325	Bra032603	Bra030501	c0001_00125
fgenesh2_kg.1__156__AT1G02420.1	AT1G02420	-	-	Bra030502	c0001_00126
fgenesh2_kg.1__159__AT1G02450.1	AT1G02450	-	Bra032601	-	c0001_00127
scaffold_100180.1	AT1G02460	Bra033328	Bra032600	-	c0001_00128
fgenesh2_kg.1__161__AT1G02470.2	AT1G02470	Bra033330	Bra032599	-	c0001_00129
fgenesh2_kg.1__167__AT1G02530.1	AT1G02520	Bra033331	-	Bra030503	c0001_00132
scaffold_100188.1	AT1G02560	Bra033332	-	Bra030504	c0001_00134
fgenesh1_pm.C_scaffold_1000142	AT1G02570	Bra033333	-	-	c0001_00135
fgenesh2_kg.1__172__AT1G02580.1	AT1G02580	Bra033334	Bra032592	-	c0001_00136
Al_scaffold_0001_173	AT1G02610	Bra033335	-	Bra030505	c0001_00137
fgenesh2_kg.1__175__AT1G02630.1	AT1G02630	Bra033336	-	Bra030506	c0001_00139
fgenesh2_kg.1__176__AT1G02640.1	AT1G02640	Bra033337	-	-	c0001_00140
scaffold_100199.1	AT1G02660	-	Bra032591	Bra030507	c0001_00141
scaffold_100200.1	AT1G02680	Bra033338	-	Bra030508	c0001_00142
fgenesh2_kg.1__185__AT1G02720.1	AT1G02720	-	Bra032589	-	c0001_00146
scaffold_100210.1	AT1G02730	Bra033344	-	-	c0001_00147
fgenesh2_kg.1__188__AT1G02750.1	AT1G02750	Bra033345	Bra032587	-	c0001_00148
fgenesh2_kg.1__189__AT1G02780.1	AT1G02780	Bra033346	Bra032586	Bra030509	c0001_00149
scaffold_100214.1	AT1G02790	Bra033347	Bra032585	Bra030510	c0001_00151
scaffold_100215.1	AT1G02800	-	Bra032584	-	c0001_00152
fgenesh2_kg.1__193__AT1G02813.1	AT1G02813	Bra033349	Bra032583	-	c0001_00153
scaffold_100219.1	AT1G02820	Bra033350	-	-	c0001_00154
fgenesh2_kg.1__195__AT1G02830.1	AT1G02830	Bra033351	Bra032582	-	c0001_00155
fgenesh2_kg.1__205__AT1G02860.1	AT1G02860	Bra033353	-	-	c0001_00157
fgenesh2_kg.1__206__AT1G02870.1	AT1G02870	Bra033354	-	-	c0001_00159
fgenesh2_kg.1__213__AT1G02890.1	AT1G02890	Bra033356	Bra032579	-	c0001_00161
fgenesh2_kg.1__215__AT1G02900.1	AT1G02900	Bra033357	-	Bra030513	c0001_00162
scaffold_100233.1	AT1G02910	-	-	Bra030514	c0001_00163
fgenesh2_kg.1__217__AT1G02920.1	AT1G02920	Bra033361	Bra032578	Bra030515	c0001_00164
scaffold_100240.1	AT1G02970	-	Bra032577	Bra030517	c0001_00166
fgenesh1_pm.C_scaffold_1000178	AT1G02980	Bra033363	Bra032576	-	c0001_00167
Al_scaffold_0001_215	AT1G02990	-	Bra032575	-	c0001_00168
fgenesh2_kg.1__231__AT1G03000.1	AT1G03000	Bra033364	Bra032565	-	c0001_00169
fgenesh1_pm.C_scaffold_1000181	AT1G03010	Bra033365	Bra032571	-	c0001_00170
scaffold_100246.1	AT1G03020	Bra033366	Bra032563	-	c0001_00171
fgenesh2_kg.1__234__AT1G03030.1	AT1G03030	Bra033367	-	-	c0001_00172
fgenesh2_kg.1__235__AT1G03040.1	AT1G03040	Bra033368	-	-	c0001_00173
fgenesh2_kg.1__236__AT1G03050.1	AT1G03050	Bra033369	Bra032561	Bra030518	c0001_00174
fgenesh2_kg.1__237__AT1G03055.1	AT1G03055	-	Bra032560	-	c0001_00175
fgenesh1_pm.C_scaffold_1000187	AT1G03060	Bra033370	Bra032559	-	c0001_00176
fgenesh2_kg.1__240__AT1G03070.1	AT1G03070	Bra033373	-	-	c0001_00177
fgenesh2_kg.1__241__AT1G03080.1	AT1G03080	-	Bra032558	-	c0001_00178
fgenesh2_kg.1__243__AT1G03090.2	AT1G03090	-	Bra032557	-	c0001_00179
scaffold_100257.1	AT1G03110	Bra033374	Bra032523	Bra030519	c0001_00182
Al_scaffold_0001_230	AT1G03120	Bra033375	-	-	c0001_00183
scaffold_100260.1	AT1G03140	-	Bra032556	Bra030520	c0001_00186
fgenesh2_kg.1__249__AT1G03160.1	AT1G03160	-	-	Bra030522	c0001_00187
scaffold_100263.1	AT1G03170	Bra033378	-	Bra030523	c0001_00188
fgenesh2_kg.1__253__AT1G03190.1	AT1G03190	-	-	Bra030524	c0070_00023
fgenesh2_kg.1__256__AT1G03230.1	AT1G03220	-	Bra032555	Bra030526	c0070_00021
fgenesh2_kg.1__257__AT1G03250.1	AT1G03250	Bra033380	-	-	c0070_00020
scaffold_100272.1	AT1G03260	-	Bra032553	-	c0070_00019
fgenesh1_pm.C_scaffold_1000207	AT1G03270	Bra033381	Bra032552	-	c0070_00018
fgenesh2_kg.1__261__AT1G03290.1	AT1G03290	Bra033382	-	-	c0070_00016
fgenesh2_kg.1__262__AT1G03310.2	AT1G03310	Bra033388	-	Bra030528	c0070_00015
fgenesh2_kg.1__264__AT1G03320.1	AT1G03320	Bra033389	-	-	c0070_00014
fgenesh2_kg.1__265__AT1G03330.1	AT1G03330	-	-	Bra030529	c0070_00013
scaffold_100282.1	AT1G03340	Bra033390	-	-	c0070_00012
fgenesh2_kg.1__267__AT1G03350.1	AT1G03350	Bra033391	-	Bra030530	c0070_00010
fgenesh2_kg.1__268__AT1G03360.1	AT1G03360	Bra033392	-	Bra030531	c0070_00009
scaffold_100286.1	AT1G03370	Bra033393	-	-	c0070_00008
fgenesh1_pg.C_scaffold_1000229	AT1G03380	Bra033394	-	-	c0070_00007
scaffold_100288.1	AT1G03390	Bra033395	-	-	c0070_00006
scaffold_100289.1	AT1G03430	Bra033398	-	-	c0070_00005
fgenesh2_kg.1__272__AT1G03440.1	AT1G03440	Bra033399	-	Bra030532	c0070_00004
fgenesh2_kg.1__275__AT1G03457.2	AT1G03457	Bra033400	-	-	c0070_00003
fgenesh2_kg.1__277__AT1G03470.1	AT1G03470	Bra033401	Bra032551	-	c0070_00002
scaffold_100294.1	AT1G03475	Bra033402	Bra032550	-	c0070_00001
scaffold_100299.1	AT1G03520	Bra033408	-	-	c0001_00211
scaffold_100301.1	AT1G03540	Bra033410	-	Bra030534	c0001_00215
fgenesh2_kg.1__284__AT1G03550.1	AT1G03550	Bra033409	Bra032549	Bra030535	c0001_00214
Al_scaffold_0001_275	AT1G03590	Bra033411	-	Bra030536	c0001_00216
fgenesh2_kg.1__286__AT1G03600.1	AT1G03600	Bra033412	-	Bra030537	c0001_00217
fgenesh2_kg.1__287__AT1G03610.1	AT1G03610	Bra033413	-	Bra030538	c0001_00218
Al_scaffold_0001_278	AT1G03620	Bra033414	-	Bra030539	c0001_00219
fgenesh2_kg.1__289__AT1G03630.1	AT1G03630	Bra033415	-	Bra030540	c0001_00220
fgenesh1_pm.C_scaffold_1000239	AT1G03650	-	Bra032548	-	c0001_00221
fgenesh2_kg.1__292__AT1G03680.1	AT1G03680	-	Bra032547	-	c0001_00222
fgenesh2_kg.1__295__AT1G03700.1	AT1G03700	Bra015256	-	-	c0001_00223
fgenesh2_kg.1__299__AT1G03730.1	AT1G03730	-	Bra032545	-	c0001_00224
Al_scaffold_0001_294	AT1G03750	-	Bra032544	-	c0001_00226
fgenesh2_kg.1__303__AT1G03760.1	AT1G03760	Bra015261	-	Bra030541	c0001_00227
fgenesh2_kg.1__304__AT1G03770.1	AT1G03770	Bra015262	-	-	c0001_00228
fgenesh2_kg.1__305__AT1G03780.2	AT1G03780	Bra015263	Bra032542	-	c0001_00229
fgenesh2_kg.1__307__AT1G03790.1	AT1G03790	Bra015264	-	Bra030542	c0001_00230
fgenesh1_pm.C_scaffold_1000251	AT1G03810	Bra015268	-	-	c0001_00231
scaffold_100333.1	AT1G03820	Bra015269	-	Bra030543	c0001_00232
fgenesh2_kg.1__312__AT1G03850.2	AT1G03850	Bra015272	Bra032540	Bra030545	c0001_00234
fgenesh2_kg.1__315__AT1G03860.1	AT1G03860	Bra015273	Bra032539	Bra030546	c0001_00235
fgenesh2_kg.1__316__AT1G03870.1	AT1G03870	Bra015274	-	-	c0001_00236
fgenesh2_kg.1__317__AT1G03880.1	AT1G03880	Bra015275	Bra032538	-	c0001_00237
fgenesh1_pm.C_scaffold_1000259	AT1G03900	Bra015277	-	Bra030548	c0811_00002
fgenesh1_pm.C_scaffold_1000262	AT1G03920	Bra015279	-	-	c0001_00240
Al_scaffold_0001_315	AT1G03930	-	Bra032536	-	c0001_00241
scaffold_100351.1	AT1G03950	Bra015280	-	Bra030552	c0001_00242
fgenesh1_pg.C_scaffold_1000285	AT1G03980	-	Bra032535	-	c0001_00243
Al_scaffold_0001_321	AT1G03982	Bra015282	-	-	c0001_00244
fgenesh2_kg.1__330__AT1G03990.1	AT1G03990	Bra015283	-	-	c0001_00245
fgenesh2_kg.1__331__AT1G04000.1	AT1G04000	Bra015284	Bra032534	-	c0001_00246
fgenesh2_kg.1__332__AT1G04010.1	AT1G04010	Bra015285	Bra032533	-	c0001_00247
fgenesh2_kg.1__333__AT1G04020.1	AT1G04020	-	Bra032532	-	c0001_00248
fgenesh2_kg.1__336__AT1G04040.1	AT1G04040	-	Bra032531	Bra030553	c0001_00250
scaffold_100363.1	AT1G04070	Bra015286	-	-	c0001_00251
fgenesh1_pg.C_scaffold_1000294	AT1G04090	Bra015288	-	-	c0001_00253
fgenesh2_kg.1__341__AT1G04110.1	AT1G04110	Bra015290	-	-	c0001_00254
scaffold_100368.1	AT1G04120	Bra015291	-	-	c0001_00255
fgenesh2_kg.1__343__AT1G04130.1	AT1G04130	-	Bra032529	-	c0001_00256
fgenesh2_kg.1__345__AT1G04140.2	AT1G04140	-	Bra032528	Bra030555	c0001_00257
Al_scaffold_0001_337	AT1G04150	-	Bra032527	-	c0001_00258
scaffold_100373.1	AT1G04160	-	Bra032526	-	c0001_00259
scaffold_100374.1	AT1G04170	Bra015292	Bra032525	Bra030556	c0001_00260
fgenesh1_pm.C_scaffold_1000285	AT1G04180	Bra015293	Bra032524	-	c0001_00261
scaffold_100371.1	AT1G04190	-	-	Bra030557	c0001_00262
fgenesh2_kg.1__350__AT1G04200.1	AT1G04200	Bra015294	-	Bra030558	c0001_00263
scaffold_100378.1	AT1G04210	Bra015295	Bra032522	-	c0001_00264
fgenesh2_kg.1__352__AT1G04220.1	AT1G04220	Bra015296	-	Bra030559	c0001_00265
scaffold_100381.1	AT1G04240	Bra015298	Bra032520	Bra030560	c0001_00266
fgenesh2_kg.1__356__AT1G04260.1	AT1G04260	-	-	Bra030561	c0001_00268
fgenesh2_kg.1__358__AT1G04270.1	AT1G04270	Bra015299	Bra032519	-	c0001_00269
Al_scaffold_0001_353	AT1G04310	Bra015303	-	-	c0001_00271
scaffold_100389.1	AT1G04330	Bra015304	Bra032517	-	c0001_00272
scaffold_100390.1	AT1G04340	Bra015305	-	Bra030565	c0001_00273
fgenesh2_kg.1__366__AT1G04350.1	AT1G04350	Bra015307	Bra032515	-	c0001_00274
scaffold_100392.1	AT1G04360	Bra015308	Bra032514	-	c0057_00028
scaffold_100393.1	AT1G04370	Bra015310	Bra032512	-	c0057_00027
fgenesh2_kg.1__368__AT1G04380.1	AT1G04380	Bra015311	-	Bra030567	c0057_00025
fgenesh1_pm.C_scaffold_1000305	AT1G04390	Bra015312	-	-	c0057_00024
fgenesh2_kg.1__371__AT1G04400.1	AT1G04400	Bra015313	-	Bra030568	c0057_00023
fgenesh2_kg.1__372__AT1G04410.1	AT1G04410	Bra015314	-	Bra030569	c0057_00022
scaffold_100399.1	AT1G04420	Bra015315	-	-	c0057_00021
fgenesh2_kg.1__374__AT1G04430.1	AT1G04430	Bra015316	-	Bra030570	c0057_00020
scaffold_100403.1	AT1G04440	Bra015317	-	-	c0057_00019
fgenesh2_kg.1__377__AT1G04445.1	AT1G04445	-	Bra032509	Bra030571	c0057_00018
fgenesh2_kg.1__378__AT1G04450.1	AT1G04450	-	Bra032508	Bra030572	c0057_00017
fgenesh2_kg.1__379__AT1G04470.1	AT1G04470	Bra015318	Bra032507	-	c0057_00015
fgenesh2_kg.1__380__AT1G04480.1	AT1G04480	Bra015319	Bra032506	Bra030573	c0057_00014
fgenesh2_kg.1__381__AT1G04490.2	AT1G04490	Bra015320	-	-	c0057_00013
scaffold_100410.1	AT1G04500	Bra015321	-	Bra030574	c0057_00012
scaffold_100412.1	AT1G04510	Bra015322	-	Bra030575	c0057_00011
fgenesh2_kg.1__386__AT1G04520.1	AT1G04520	Bra015323	-	-	c0057_00010
fgenesh2_kg.1__387__AT1G04530.1	AT1G04530	Bra015324	-	-	c0057_00009
fgenesh2_kg.1__388__AT1G04540.1	AT1G04540	Bra015325	Bra032504	-	c0057_00008
fgenesh2_kg.1__390__AT1G04550.2	AT1G04550	Bra015326	Bra032503	-	c0057_00007
fgenesh2_kg.1__391__AT1G04555.1	AT1G04555	Bra015327	-	-	c0057_00006
fgenesh2_kg.1__392__AT1G04560.1	AT1G04560	Bra015328	Bra032502	-	c0057_00005
scaffold_100422.1	AT1G04570	Bra015329	-	-	c0057_00004
fgenesh2_kg.1__394__AT1G04580.1	AT1G04580	Bra015330	-	-	c0057_00003
scaffold_100424.1	AT1G04590	Bra015331	Bra032501	-	c0057_00002
scaffold_100425.1	AT1G04600	-	-	Bra030576	c0057_00001
fgenesh2_kg.1__398__AT1G04610.1	AT1G04610	Bra015334	Bra032499	-	c0586_00003
fgenesh2_kg.1__399__AT1G04620.1	AT1G04620	Bra015335	-	-	c0001_00304
fgenesh2_kg.1__400__AT1G04630.1	AT1G04630	Bra015336	Bra032498	Bra030577	c0001_00305
fgenesh1_pm.C_scaffold_1000331	AT1G04640	Bra015337	-	Bra030580	c0001_00307
Al_scaffold_0001_394	AT1G04650	Bra015338	-	Bra030581	c0001_00308
fgenesh2_kg.1__406__AT1G04660.1	AT1G04660	-	Bra032496	Bra030582	c0001_00309
fgenesh2_kg.1__407__AT1G04670.1	AT1G04670	Bra015340	Bra032495	-	c0001_00310
scaffold_100437.1	AT1G04680	Bra015341	Bra032494	Bra030583	c0001_00311
fgenesh2_kg.1__409__AT1G04690.1	AT1G04690	Bra015342	-	Bra030584	c0001_00312
fgenesh2_kg.1__412__AT1G04710.1	AT1G04710	-	-	Bra030586	c0001_00314
scaffold_100442.1	AT1G04730	Bra015344	-	Bra030587	c0001_00315
scaffold_100443.1	AT1G04750	Bra015345	Bra032493	Bra030588	c0001_00316
scaffold_100445.1	AT1G04770	Bra015346	-	Bra030589	c0001_00318
fgenesh2_kg.1__417__AT1G04780.1	AT1G04780	Bra015348	-	Bra030590	c0001_00320
fgenesh2_kg.1__418__AT1G04790.1	AT1G04790	Bra015349	-	-	c0001_00321
fgenesh2_kg.1__421__AT1G04830.1	AT1G04830	Bra015351	-	Bra030591	c0001_00324
fgenesh1_pm.C_scaffold_1000349	AT1G04840	Bra015357	-	-	c0001_00325
fgenesh2_kg.1__423__AT1G04850.1	AT1G04850	-	-	Bra030592	c0001_00326
fgenesh2_kg.1__424__AT1G04860.1	AT1G04860	-	Bra032492	Bra030593	c0001_00327
fgenesh2_kg.1__427__AT1G04880.1	AT1G04880	Bra015358	Bra032491	Bra030594	c0001_00328
fgenesh2_kg.1__428__AT1G04890.1	AT1G04890	Bra015360	-	-	c0001_00329
fgenesh2_kg.1__429__AT1G04900.1	AT1G04900	Bra015362	-	-	c0001_00330
fgenesh2_kg.1__430__AT1G04910.1	AT1G04910	Bra015363	Bra032487	-	c0092_00021
fgenesh2_kg.1__431__AT1G04920.1	AT1G04920	Bra015364	-	-	c0092_00020
scaffold_100462.1	AT1G04930	Bra015366	-	-	c0092_00019
scaffold_100463.1	AT1G04940	Bra015367	-	-	c0092_00018
fgenesh2_kg.1__434__AT1G04945.2	AT1G04945	-	-	Bra030597	c0092_00017
fgenesh1_pg.C_scaffold_1000377	AT1G04950	Bra015368	-	Bra030598	c0092_00016
fgenesh2_kg.1__438__AT1G04960.1	AT1G04960	Bra015369	-	-	c0092_00015
scaffold_100467.1	AT1G04970	Bra015371	-	-	c0092_00013
fgenesh2_kg.1__442__AT1G04980.1	AT1G04980	Bra015375	-	-	c0092_00012
Al_scaffold_0001_428	AT1G04985	-	-	Bra030599	c0092_00011
Al_scaffold_0001_429	AT1G04990	Bra015377	-	-	c0092_00010
fgenesh2_kg.1__445__AT1G05000.1	AT1G05000	Bra015379	-	-	c0092_00009
scaffold_100473.1	AT1G05010	Bra015380	-	-	c0092_00008
scaffold_100474.1	AT1G05020	Bra015381	-	Bra030600	c0092_00007
fgenesh1_pg.C_scaffold_1000388	AT1G05040	Bra015383	-	-	c0092_00006
fgenesh2_kg.1__449__AT1G05055.1	AT1G05055	-	-	Bra030602	c0092_00005
fgenesh2_kg.1__452__AT1G05070.1	AT1G05070	Bra015386	-	-	c0092_00002
fgenesh2_kg.1__454__AT4G20720.1	AT1G05090	Bra015387	-	Bra030603	c0092_00001
fgenesh2_kg.1__456__AT1G05100.1	AT1G05100	Bra015388	-	-	c0001_00348
fgenesh2_kg.1__457__AT1G05120.1	AT1G05120	Bra015389	-	Bra030604	c0001_00349
fgenesh2_kg.1__458__AT1G05140.1	AT1G05140	Bra015391	-	-	c0145_00015
fgenesh2_kg.1__459__AT1G05150.1	AT1G05150	Bra015393	-	-	c0145_00014
fgenesh2_kg.1__460__AT1G05160.1	AT1G05160	Bra015394	-	-	c0145_00013
fgenesh1_pm.C_scaffold_1000383	AT1G05170	Bra015395	-	-	c0145_00012
fgenesh2_kg.1__465__AT1G05180.1	AT1G05180	Bra015396	Bra032482	-	c0001_00354
fgenesh2_kg.1__466__AT1G05190.1	AT1G05190	Bra015397	Bra032481	-	c0145_00010
fgenesh2_kg.1__467__AT1G05200.2	AT1G05200	Bra015398	Bra032480	-	c0001_00355
fgenesh2_kg.1__469__AT1G05205.1	AT1G05205	Bra015399	Bra032479	-	c0145_00008
fgenesh2_kg.1__470__AT1G05210.1	AT1G05210	Bra015400	-	Bra030605	c0001_00356
Al_scaffold_0001_457	AT1G05240	Bra015404	Bra032474	Bra030607	c0001_00358
scaffold_100503.1	AT1G05270	Bra015405	Bra032473	Bra030608	c0145_00001
scaffold_100504.1	AT1G05280	Bra015411	Bra032472	Bra030610	c0001_00362
fgenesh2_kg.1__481__AT1G05300.1	AT1G05300	Bra015415	-	-	c0001_00364
Al_scaffold_0001_466	AT1G05310	Bra015416	Bra032469	-	c0001_00366
scaffold_100511.1	AT1G05330	Bra015418	-	-	c0001_00368
fgenesh2_kg.1__489__AT1G05350.1	AT1G05350	Bra015420	Bra032467	-	c0001_00370
scaffold_100515.1	AT1G05360	-	Bra032466	-	c0001_00371
scaffold_100516.1	AT1G05370	Bra015421	Bra032465	-	c0001_00372
fgenesh2_kg.1__497__AT1G05410.1	AT1G05410	Bra015422	-	-	c0001_00377
scaffold_100520.1	AT1G05420	-	Bra032464	-	c0001_00376
fgenesh2_kg.1__498__AT1G05430.1	AT1G05430	Bra015423	-	-	c0001_00378
scaffold_100523.1	AT1G05440	Bra015424	Bra032463	-	c0001_00379
fgenesh1_pg.C_scaffold_1000431	AT1G05470	Bra015428	-	Bra030611	c0001_00383
fgenesh2_kg.1__503__AT1G05490.1	AT1G05490	Bra015430	-	-	c0001_00384
fgenesh2_kg.1__504__AT1G05500.1	AT1G05500	Bra015431	-	Bra030612	c0001_00386
fgenesh2_kg.1__505__AT1G05510.1	AT1G05510	Bra015432	-	-	c0001_00387
fgenesh2_kg.1__506__AT1G05520.1	AT1G05520	-	-	Bra030613	c0001_00388
scaffold_100538.1	AT1G05560	Bra015435	-	-	c0001_00389
Al_scaffold_0001_492	AT1G05570	Bra015436	-	-	c0001_00390
fgenesh2_kg.1__512__AT1G05577.1	AT1G05577	Bra015441	Bra032461	-	c0001_00391
scaffold_100542.1	AT1G05580	Bra015442	-	-	c0001_00392
fgenesh2_kg.1__517__AT1G05610.1	AT1G05610	Bra015444	-	-	c0001_00394
fgenesh2_kg.1__518__AT1G05620.1	AT1G05620	-	Bra032458	Bra030616	c0001_00395
fgenesh2_kg.1__520__AT1G05630.1	AT1G05630	Bra015445	Bra032456	Bra030617	c0001_00396
fgenesh2_kg.1__525__AT1G05670.1	AT1G05670	Bra015447	-	Bra030620	c0074_00020
scaffold_100554.1	AT1G05690	-	-	Bra030621	c0074_00018
scaffold_100556.1	AT1G05710	Bra015450	-	-	c0074_00016
fgenesh2_kg.1__534__AT1G05730.1	AT1G05730	-	Bra032454	-	c0074_00014
fgenesh2_kg.1__536__AT1G05750.1	AT1G05750	-	-	Bra030624	c0074_00013
fgenesh1_pm.C_scaffold_1000440	AT1G05790	Bra015453	-	Bra030625	c0001_00405
fgenesh2_kg.1__541__AT1G05800.1	AT1G05800	Bra015454	-	-	c0074_00010
fgenesh2_kg.1__542__AT1G05805.1	AT1G05805	Bra015456	-	-	c0074_00009
scaffold_100568.1	AT1G05810	-	Bra032453	-	c0074_00008
scaffold_100569.1	AT1G05820	-	-	Bra030626	c0074_00007
fgenesh2_kg.1__549__AT1G05840.1	AT1G05840	-	Bra032452	-	c0074_00004
fgenesh2_kg.1__550__AT1G05850.1	AT1G05850	Bra015457	-	Bra030628	c0074_00003
fgenesh2_kg.1__551__AT1G05860.1	AT1G05860	Bra015458	-	Bra030629	c0001_00409
fgenesh2_kg.1__552__AT1G05870.2	AT1G05870	Bra015459	Bra032451	-	c0001_00410
fgenesh1_pm.C_scaffold_1000455	AT1G05920	Bra015465	-	-	c0001_00412
Al_scaffold_0001_534	AT1G05960	Bra015466	Bra032445	Bra030631	c0001_00415
fgenesh2_kg.1__564__AT1G05970.2	AT1G05970	Bra015467	-	-	c0001_00416
scaffold_100586.1	AT1G05990	-	Bra032444	Bra030632	c0001_00417
Al_scaffold_0001_538	AT1G06010	-	Bra032443	Bra030633	c0001_00419
fgenesh1_pm.C_scaffold_1000461	AT1G06020	Bra015468	Bra032442	Bra030634	c0001_00420
fgenesh2_kg.1__570__AT1G06040.1	AT1G06040	Bra015469	Bra032441	Bra030635	c0001_00421
scaffold_100592.1	AT1G06050	Bra015470	-	-	c0001_00422
fgenesh2_kg.1__572__AT1G06060.1	AT1G06060	-	-	Bra030636	c0001_00423
scaffold_100594.1	AT1G06070	Bra015471	-	Bra030637	c0001_00424
scaffold_100596.1	AT1G06080	Bra015473	Bra032437	Bra030638	c0001_00425
fgenesh1_pm.C_scaffold_1000471	AT1G06130	-	Bra032436	-	c0001_00427
fgenesh2_kg.1__583__AT1G06140.1	AT1G06140	Bra015476	Bra032434	-	c0001_00429
fgenesh2_kg.1__587__AT1G06160.1	AT1G06160	Bra015478	Bra032433	-	c0001_00432
fgenesh1_pg.C_scaffold_1000487	AT1G06170	Bra015480	-	-	c0001_00433
fgenesh2_kg.1__590__AT1G06180.1	AT1G06180	Bra015481	-	-	c0001_00434
scaffold_100613.1	AT1G06190	Bra015482	-	-	c0001_00435
fgenesh1_pm.C_scaffold_1000479	AT1G06210	Bra015484	Bra032432	Bra030641	c0001_00436
fgenesh2_kg.1__596__AT5G25230.1	AT1G06220	-	-	Bra030642	c0001_00437
fgenesh1_pg.C_scaffold_1000493	AT1G06230	Bra015485	Bra032431	Bra030643	c0001_00439
scaffold_100621.1	AT1G06260	Bra015487	-	Bra030646	c0001_00441
scaffold_100623.1	AT1G06270	Bra015488	-	-	c0001_00442
scaffold_100624.1	AT1G06280	-	Bra032430	Bra030647	c0001_00443
fgenesh2_kg.1__603__AT1G06290.1	AT1G06290	Bra015494	-	-	c0001_00444
Al_scaffold_0001_572	AT1G06320	-	Bra032429	Bra030648	c0001_00445
fgenesh1_pm.C_scaffold_1000491	AT1G06330	-	Bra032428	-	c0001_00446
scaffold_100630.1	AT1G06340	-	Bra032427	-	c0001_00447
fgenesh2_kg.1__607__AT1G06350.1	AT1G06350	Bra015493	-	Bra030650	c0001_00448
scaffold_100634.1	AT1G06380	-	Bra032426	-	c0001_00449
scaffold_100636.1	AT1G06400	-	Bra032424	-	c0001_00450
fgenesh2_kg.1__614__AT1G06410.1	AT1G06410	Bra015497	-	Bra030651	c0001_00451
fgenesh2_kg.1__615__AT1G06420.1	AT1G06420	Bra015498	Bra032423	-	c0001_00452
Al_scaffold_0001_584	AT1G06430	Bra015499	-	Bra030652	c0001_00453
scaffold_100641.1	AT1G06440	Bra015500	-	-	c0001_00454
scaffold_100642.1	AT1G06450	-	Bra032421	-	c0001_00455
Al_scaffold_0001_587	AT1G06460	Bra015501	-	Bra030653	c0001_00456
scaffold_100644.1	AT1G06470	Bra015502	-	Bra030654	c0001_00457
fgenesh2_kg.1__622__AT1G06475.1	AT1G06475	Bra015503	-	-	c0001_00458
fgenesh2_kg.1__623__AT1G06490.1	AT1G06490	Bra015504	Bra032416	-	c0001_00459
scaffold_100649.1	AT1G06510	Bra015506	-	-	c0001_00460
scaffold_100650.1	AT1G06520	Bra015507	-	-	c0001_00461
Al_scaffold_0001_596	AT1G06540	Bra015509	-	-	c0001_00463
Al_scaffold_0001_597	AT1G06550	-	-	Bra030657	c0001_00464
Al_scaffold_0001_598	AT1G06560	Bra015510	-	Bra030658	c0001_00465
scaffold_100655.1	AT1G06570	Bra015511	Bra032415	-	c0001_00466
scaffold_100656.1	AT1G06590	Bra015512	Bra032414	-	c0001_00467
Al_scaffold_0001_601	AT1G06620	Bra015515	Bra032413	-	c0001_00468
scaffold_100662.1	AT1G06660	Bra015516	-	Bra030659	c0001_00469
fgenesh2_kg.1__643__AT1G06680.1	AT1G06680	Bra015520	Bra031534	Bra030660	c0001_00471
fgenesh2_kg.1__645__AT1G06690.1	AT1G06690	-	-	Bra030661	c0001_00472
scaffold_100669.1	AT1G06730	Bra015523	-	-	c0001_00474
fgenesh2_kg.1__652__AT1G06760.1	AT1G06760	Bra015524	-	-	c0001_00476
scaffold_100673.1	AT1G06770	Bra015526	-	-	c0001_00477
fgenesh2_kg.1__655__AT1G06780.1	AT1G06780	Bra015529	Bra031537	-	c0001_00479
Al_scaffold_0001_618	AT1G06790	-	Bra031538	Bra030662	c0001_00481
fgenesh2_kg.1__656__AT1G06800.1	AT1G06800	Bra015531	-	-	c0001_00482
fgenesh2_kg.1__658__AT1G06820.1	AT1G06820	-	Bra031539	-	c0001_00483
fgenesh2_kg.1__659__AT1G06830.1	AT1G06830	Bra015532	Bra031540	-	c0001_00484
Al_scaffold_0001_622	AT1G06840	Bra015533	-	-	c0001_00485
Al_scaffold_0001_623	AT1G06850	-	Bra031541	Bra030663	c0001_00486
fgenesh2_kg.1__663__AT1G06870.1	AT1G06870	Bra015534	Bra031542	-	c0001_00487
fgenesh1_pm.C_scaffold_1000536	AT1G06910	-	Bra031545	-	c0001_00489
fgenesh2_kg.1__667__AT1G06920.1	AT1G06920	-	Bra031546	-	c0001_00507
fgenesh2_kg.1__668__AT1G06930.1	AT1G06930	Bra015537	-	-	c0001_00491
fgenesh2_kg.1__669__AT1G06950.1	AT1G06950	Bra015538	-	Bra030666	c0001_00492
fgenesh1_pm.C_scaffold_1000542	AT1G06970	-	Bra031548	Bra030667	c0001_00493
fgenesh2_kg.1__674__AT1G06980.1	AT1G06980	Bra015540	Bra031549	Bra030668	c0001_00494
fgenesh1_pm.C_scaffold_1000544	AT1G06990	Bra015542	Bra031550	-	c0001_00495
fgenesh2_kg.1__676__AT1G07000.1	AT1G07000	Bra015543	-	-	c0001_00497
fgenesh2_kg.1__678__AT1G07010.1	AT1G07010	Bra015544	-	-	c0001_00498
fgenesh1_pg.C_scaffold_1000572	AT1G07060	Bra015549	-	-	c0001_00501
fgenesh2_kg.1__684__AT1G07080.1	AT1G07080	Bra015550	Bra031551	Bra030670	c0001_00502
scaffold_100712.1	AT1G07090	Bra015551	Bra031552	-	c0001_00503
fgenesh2_kg.1__686__AT1G07110.1	AT1G07110	Bra015552	Bra031553	-	c0001_00504
fgenesh2_kg.1__687__AT1G07120.1	AT1G07120	-	-	Bra030671	c0001_00508
scaffold_100715.1	AT1G07130	-	-	Bra030672	c0001_00509
fgenesh1_pg.C_scaffold_1000578	AT1G07150	Bra015556	-	-	c0001_00512
fgenesh2_kg.1__690__AT1G07160.1	AT1G07160	Bra015496	-	-	c0001_00513
fgenesh1_pg.C_scaffold_1000580	AT1G07170	Bra015559	-	-	c0001_00514
scaffold_100724.1	AT1G07180	Bra015560	-	Bra030676	c0001_00515
fgenesh1_pm.C_scaffold_1000563	AT1G07200	Bra015561	Bra031556	-	c0001_00516
scaffold_100726.1	AT1G07210	Bra015562	Bra031557	-	c0001_00517
scaffold_100727.1	AT1G07220	Bra015563	Bra031558	-	c0001_00518
scaffold_100728.1	AT1G07230	Bra015564	-	-	c0001_00519
fgenesh2_kg.1__696__AT1G07240.1	AT1G07240	Bra015568	Bra031559	-	c0001_00520
fgenesh2_kg.1__699__AT1G07280.1	AT1G07280	Bra015570	Bra031567	-	c0001_00523
fgenesh2_kg.1__700__AT1G07290.1	AT1G07290	Bra015571	Bra031568	-	c0136_00012
scaffold_100735.1	AT1G07300	Bra015572	Bra031569	-	c0001_00525
fgenesh2_kg.1__702__AT1G07310.1	AT1G07310	Bra015573	Bra031570	-	c0136_00010
fgenesh2_kg.1__705__AT1G07320.2	AT1G07320	Bra015574	-	-	c0001_00526
fgenesh1_pg.C_scaffold_1000595	AT1G07340	Bra015575	-	Bra030678	c0001_00527
fgenesh2_kg.1__710__AT1G07350.1	AT1G07350	Bra015576	-	-	c0136_00007
fgenesh2_kg.1__711__AT1G07360.1	AT1G07360	-	-	Bra030679	c0001_00528
scaffold_100742.1	AT1G07370	-	Bra031571	-	c0001_00529
fgenesh1_pm.C_scaffold_1000580	AT1G07380	Bra015577	-	Bra030680	c0001_00530
Al_scaffold_0001_682	AT1G07390	-	Bra031572	-	c0001_00531
Al_scaffold_0001_685	AT1G07410	Bra015578	Bra031573	-	c0001_00532
fgenesh2_kg.1__718__AT1G07430.1	AT1G07430	Bra015579	Bra031574	-	c0001_00533
fgenesh2_kg.1__720__AT1G07440.1	AT1G07440	Bra015580	Bra031575	Bra030683	c0001_00534
fgenesh2_kg.1__722__AT1G07460.1	AT1G07460	-	Bra031576	Bra030682	c0001_00535
fgenesh2_kg.1__725__AT1G07480.2	AT1G07470	-	-	Bra030684	c0001_00536
fgenesh1_pm.C_scaffold_1000585	AT1G07473	Bra015581	-	Bra030685	c0001_00537
scaffold_100758.1	AT1G07510	-	Bra031579	-	c0001_00540
Al_scaffold_0001_697	AT1G07520	Bra015584	Bra031581	Bra030688	c0001_00541
Al_scaffold_0001_698	AT1G07540	Bra015585	-	Bra030689	c0001_00543
scaffold_100762.1	AT1G07550	Bra015587	Bra031585	Bra030691	c0001_00550
fgenesh2_kg.1__739__AT1G07590.1	AT1G07590	-	Bra031586	-	c0001_00547
Al_scaffold_0001_706	AT1G07640	-	Bra031588	Bra030696	c0001_00549
fgenesh1_pg.C_scaffold_1000618	AT1G07645	Bra018692	Bra031589	-	c0001_00551
fgenesh2_kg.1__747__AT1G07820.2	AT1G07660	Bra018691	-	-	c0001_00552
fgenesh2_kg.1__748__AT1G07810.1	AT1G07670	Bra018690	Bra031583	-	c0001_00553
scaffold_100779.1	AT1G07705	-	-	Bra030703	c0001_00560
fgenesh2_kg.1__756__AT1G07720.1	AT1G07720	Bra018684	-	Bra030702	c0001_00558
scaffold_100782.1	AT1G07725	Bra018685	-	-	c0001_00557
fgenesh2_kg.1__764__AT1G07770.2	AT1G07770	Bra018689	Bra031590	Bra030697	c0001_00555
fgenesh2_kg.1__769__AT1G07830.1	AT1G07830	Bra018681	Bra031595	-	c0331_00008
scaffold_100798.1	AT1G07840	Bra018680	-	-	c0331_00007
Al_scaffold_0001_734	AT1G07850	Bra018679	-	-	c0331_00006
fgenesh2_kg.1__775__AT1G07870.1	AT1G07870	Bra018678	Bra031596	Bra030705	c0001_00563
Al_scaffold_0001_737	AT1G07880	-	Bra031597	-	c0001_00564
fgenesh2_kg.1__778__AT1G07890.1	AT1G07890	Bra018677	Bra031598	Bra030706	c0001_00565
fgenesh1_pm.C_scaffold_1000623	AT1G07900	Bra018675	Bra031599	-	c0331_00001
fgenesh2_kg.1__786__AT1G07910.1	AT1G07910	Bra018674	Bra031600	-	c0001_00566
fgenesh2_kg.1__791__AT1G07930.1	AT1G07920	Bra018669	Bra031602	Bra030707	c0001_00567
fgenesh1_pg.C_scaffold_1000650	AT1G07980	Bra018668	Bra031606	-	c0001_00568
fgenesh2_kg.1__804__AT1G07985.1	AT1G07985	Bra018667	-	-	c0001_00569
scaffold_100816.1	AT1G07990	Bra018666	Bra031607	Bra030708	c0001_00570
fgenesh2_kg.1__806__AT1G08010.1	AT1G08000	Bra018665	Bra031608	Bra030709	c0001_00571
fgenesh1_pg.C_scaffold_1000655	AT1G08030	Bra018664	-	Bra030710	c0001_00572
fgenesh2_kg.1__815__AT1G08060.1	AT1G08060	Bra018662	Bra031609	-	c0001_00575
fgenesh2_kg.1__817__AT1G08070.1	AT1G08070	Bra018658	-	-	c0001_00576
fgenesh1_pg.C_scaffold_1000665	AT1G08110	Bra018654	-	-	c0001_00578
scaffold_100834.1	AT1G08130	Bra018652	Bra031612	-	c0001_00579
fgenesh2_kg.1__825__AT1G08135.1	AT1G08135	Bra018651	Bra031614	-	c0001_00580
fgenesh2_kg.1__831__AT1G08160.1	AT1G08160	Bra018648	Bra031615	Bra030714	c0001_00583
fgenesh2_kg.1__832__AT1G08170.1	AT1G08170	Bra018646	-	-	c0001_00584
scaffold_100843.1	AT1G08180	Bra018645	-	Bra030715	c0001_00585
scaffold_100844.1	AT1G08190	Bra018644	-	-	c0001_00586
fgenesh2_kg.1__836__AT1G08210.1	AT1G08210	-	Bra031617	Bra030717	c0001_00587
fgenesh2_kg.1__837__AT1G08220.1	AT1G08220	-	Bra031618	Bra030718	c0001_00588
scaffold_100851.1	AT1G08260	Bra018641	-	-	c0001_00590
fgenesh1_pm.C_scaffold_1000660	AT1G08270	Bra018640	-	-	c0001_00591
fgenesh2_kg.1__843__AT1G08280.1	AT1G08280	Bra018639	-	-	c0001_00592
fgenesh1_pg.C_scaffold_1000684	AT1G08290	Bra018638	Bra031621	-	c0001_00593
Al_scaffold_0001_788	AT1G08300	Bra018637	-	-	c0001_00594
fgenesh1_pm.C_scaffold_1000665	AT1G08320	Bra018634	Bra031622	-	c0001_00596
fgenesh2_kg.1__849__AT1G08340.1	AT1G08340	Bra018633	-	-	c0001_00598
scaffold_100860.1	AT1G08350	Bra018632	-	-	c0001_00599
scaffold_100861.1	AT1G08360	Bra018631	-	-	c0001_00600
fgenesh2_kg.1__852__AT1G08370.1	AT1G08370	Bra018630	Bra031623	Bra030721	c0001_00601
fgenesh2_kg.1__853__AT1G08380.1	AT1G08380	Bra018629	Bra031624	Bra030722	c0001_00602
fgenesh2_kg.1__854__AT1G08390.1	AT1G08390	Bra018628	-	-	c0001_00603
fgenesh2_kg.1__855__AT1G08400.1	AT1G08400	Bra018627	-	-	c0001_00604
scaffold_100866.1	AT1G08410	-	Bra031625	Bra030723	c0001_00605
scaffold_100867.1	AT1G08420	Bra018626	Bra031626	Bra030724	c0001_00606
scaffold_100868.1	AT1G08430	Bra018625	-	Bra030726	c0001_00607
scaffold_100870.1	AT1G08450	-	Bra031627	Bra030727	c0001_00608
fgenesh2_kg.1__860__AT1G08460.1	AT1G08460	-	Bra031628	-	c0001_00609
fgenesh2_kg.1__861__AT1G08465.1	AT1G08465	Bra018624	Bra031629	Bra030728	c0001_00610
fgenesh2_kg.1__862__AT1G08470.1	AT1G08470	Bra018623	-	-	c0001_00611
scaffold_100875.1	AT1G08480	Bra018622	-	Bra030729	c0001_00612
fgenesh2_kg.1__864__AT1G08490.1	AT1G08490	Bra018621	-	-	c0001_00613
fgenesh2_kg.1__865__AT1G08500.1	AT1G08500	-	Bra031630	Bra030730	c0001_00614
scaffold_100878.1	AT1G08510	Bra018620	Bra031631	Bra030731	c0001_00615
fgenesh1_pm.C_scaffold_1000683	AT1G08520	Bra018619	-	-	c0001_00616
fgenesh1_pm.C_scaffold_1000684	AT1G08530	Bra018618	-	-	c0001_00617
fgenesh2_kg.1__869__AT1G08540.1	AT1G08540	Bra018617	-	Bra030732	c0001_00618
fgenesh2_kg.1__870__AT1G08550.1	AT1G08550	Bra018616	-	-	c0001_00619
fgenesh2_kg.1__872__AT1G08560.1	AT1G08560	Bra018615	-	Bra030733	c0001_00620
fgenesh2_kg.1__874__AT1G08570.1	AT1G08570	Bra018614	Bra031632	-	c0001_00621
scaffold_100886.1	AT1G08580	Bra018613	Bra031633	-	c0001_00622
fgenesh2_kg.1__877__AT1G08590.1	AT1G08590	-	-	Bra030734	c0001_00623
fgenesh2_kg.1__878__AT1G08600.1	AT1G08600	Bra018612	Bra031634	-	c0001_00624
fgenesh2_kg.1__879__AT1G08610.1	AT1G08610	-	Bra031635	-	c0001_00625
fgenesh1_pg.C_scaffold_1000714	AT1G08620	-	-	Bra030735	c0001_00626
fgenesh2_kg.1__884__AT1G08630.2	AT1G08630	Bra018611	Bra031636	Bra030736	c0001_00627
fgenesh2_kg.1__886__AT1G08640.1	AT1G08640	Bra018610	-	-	c0001_00628
scaffold_100894.1	AT1G08650	Bra018609	-	Bra030737	c0001_00629
fgenesh2_kg.1__888__AT1G08660.1	AT1G08660	Bra018608	Bra031637	-	c0001_00630
fgenesh1_pg.C_scaffold_1000720	AT1G08670	-	Bra031638	-	c0001_00631
fgenesh2_kg.1__891__AT1G08680.1	AT1G08680	Bra018607	-	-	c0001_00632
fgenesh2_kg.1__895__AT1G08700.1	AT1G08700	Bra018606	-	-	c0001_00633
scaffold_100904.1	AT1G08750	Bra018604	-	-	c0001_00635
fgenesh2_kg.1__903__AT1G08760.1	AT1G08760	Bra018603	Bra031640	-	c0001_00636
scaffold_100906.1	AT1G08770	Bra018602	-	-	c0001_00637
fgenesh1_pg.C_scaffold_1000726	AT1G08780	Bra018601	-	Bra030740	c0001_00638
Al_scaffold_0001_838	AT1G08790	Bra018600	-	Bra030741	c0001_00639
fgenesh2_kg.1__907__AT1G08800.2	AT1G08800	Bra018599	-	Bra030742	c0001_00640
scaffold_100910.1	AT1G08810	Bra018598	-	Bra030743	c0001_00641
fgenesh1_pm.C_scaffold_1000711	AT1G08820	Bra018597	Bra031641	Bra030744	c0001_00642
scaffold_100912.1	AT1G08830	-	Bra031642	-	c0001_00643
fgenesh2_kg.1__912__AT1G08845.1	AT1G08845	Bra018596	Bra031644	-	c0001_00645
fgenesh2_kg.1__913__AT1G08860.1	AT1G08860	-	Bra031645	-	c0001_00646
scaffold_100916.1	AT1G08880	Bra018595	Bra031646	Bra030745	c0001_00647
fgenesh2_kg.1__915__AT1G08890.1	AT1G08890	Bra018594	Bra031649	Bra030748	c0001_00649
fgenesh1_pg.C_scaffold_1000741	AT1G08940	Bra018590	-	-	c0001_00651
scaffold_100925.1	AT1G08980	-	Bra031652	-	c0001_00653
fgenesh2_kg.1__932__AT1G08990.1	AT1G08990	-	Bra031653	Bra030750	c0001_00654
scaffold_100928.1	AT1G09010	Bra018587	-	Bra030751	c0001_00655
fgenesh2_kg.1__935__AT1G09020.1	AT1G09020	Bra018586	Bra031654	Bra030752	c0001_00656
scaffold_100932.1	AT1G09030	Bra018585	-	-	c0001_00657
fgenesh2_kg.1__937__AT1G09040.1	AT1G09040	Bra018583	Bra031655	Bra030753	c0001_00658
fgenesh2_kg.1__941__AT1G09060.2	AT1G09060	-	-	Bra030754	c0001_00659
fgenesh2_kg.1__942__AT1G09070.1	AT1G09070	Bra018582	Bra031656	Bra030755	c0001_00660
fgenesh1_pm.C_scaffold_1000734	AT1G09080	-	Bra031657	-	c0001_00661
fgenesh2_kg.1__945__AT1G09090.2	AT1G09090	-	Bra031658	-	c0001_00662
scaffold_100942.1	AT1G09130	-	-	Bra030756	c0703_00002
fgenesh2_kg.1__949__AT1G09140.1	AT1G09140	Bra018581	-	-	c0001_00663
scaffold_100944.1	AT1G09150	Bra018580	-	Bra030757	c0001_00664
fgenesh2_kg.1__956__AT1G09160.2	AT1G09160	Bra018578	-	Bra030759	c0001_00665
fgenesh1_pm.C_scaffold_1000741	AT1G09170	-	-	Bra030760	c0001_00666
fgenesh2_kg.1__960__AT1G09180.1	AT1G09180	Bra018576	-	-	c0001_00668
fgenesh1_pm.C_scaffold_1000744	AT1G09190	Bra018577	-	-	c0001_00667
fgenesh2_kg.1__964__AT1G09210.1	AT1G09210	Bra018575	-	Bra030763	c0001_00670
fgenesh2_kg.1__967__AT1G09240.1	AT1G09240	Bra018573	-	-	c0001_00672
fgenesh2_kg.1__968__AT1G09250.1	AT1G09250	Bra018572	-	-	c0001_00673
scaffold_100962.1	AT1G09270	Bra018570	-	Bra030765	c0001_00674
fgenesh2_kg.1__972__AT1G09280.1	AT1G09280	Bra018569	-	-	c0001_00675
fgenesh2_kg.1__973__AT1G09290.1	AT1G09290	-	-	Bra030766	c0001_00676
fgenesh2_kg.1__975__AT1G09300.1	AT1G09300	-	-	Bra030767	c0001_00677
fgenesh2_kg.1__976__AT1G09310.1	AT1G09310	Bra018568	-	Bra030768	c0001_00678
fgenesh2_kg.1__978__AT1G09330.1	AT1G09330	Bra018566	-	Bra030769	c0001_00679
fgenesh2_kg.1__979__AT1G09340.1	AT1G09340	Bra020030	Bra031662	-	c0001_00680
fgenesh1_pm.C_scaffold_1000758	AT1G09350	-	Bra031663	-	c0001_00681
scaffold_100971.1	AT1G09360	Bra020029	-	-	c0001_00682
fgenesh2_kg.1__982__AT1G09370.1	AT1G09370	Bra020028	-	-	c0001_00683
scaffold_100974.1	AT1G09380	Bra020026	Bra031664	-	c0001_00684
fgenesh1_pg.C_scaffold_1000783	AT1G09390	Bra020025	-	-	c0001_00685
scaffold_100976.1	AT1G09400	-	-	Bra030774	c0001_00686
fgenesh2_kg.1__988__AT1G09420.1	AT1G09420	-	-	Bra030775	c0001_00687
fgenesh2_kg.1__990__AT1G09430.1	AT1G09430	-	-	Bra030777	c0001_00688
fgenesh1_pm.C_scaffold_1000767	AT1G09440	Bra020024	Bra031665	-	c0001_00689
Al_scaffold_0001_908	AT1G09460	Bra020023	-	Bra030780	c0001_00691
fgenesh2_kg.1__994__AT1G09470.1	AT1G09470	Bra020022	-	-	c0001_00692
fgenesh2_kg.1__1001__AT1G09520.1	AT1G09520	Bra020018	Bra031667	Bra030782	c0001_00695
fgenesh2_kg.1__1002__AT1G09530.2	AT1G09530	Bra020017	Bra031668	-	c0001_00696
scaffold_100991.1	AT1G09540	Bra020016	Bra031669	Bra030783	c0001_00697
fgenesh1_pm.C_scaffold_1000777	AT1G09550	Bra020015	-	Bra030784	c0001_00698
Al_scaffold_0001_916	AT1G09560	Bra020014	Bra031671	Bra030785	c0001_00699
fgenesh2_kg.1__1007__AT1G09570.1	AT1G09570	Bra020013	Bra031672	-	c0001_00700
Al_scaffold_0001_918	AT1G09575	Bra020011	-	-	c0001_00701
fgenesh2_kg.1__1010__AT1G09580.1	AT1G09580	Bra020010	Bra031678	Bra030786	c0001_00702
fgenesh2_kg.1__1011__AT1G09590.1	AT1G09590	Bra020009	Bra031673	Bra030787	c0001_00703
scaffold_100999.1	AT1G09610	-	-	Bra030789	c0001_00704
fgenesh2_kg.1__1014__AT1G09620.1	AT1G09620	Bra020007	Bra031675	-	c0001_00705
scaffold_101002.1	AT1G09630	Bra020006	-	-	c0001_00706
fgenesh2_kg.1__1017__AT1G09640.1	AT1G09640	Bra020005	Bra031676	Bra030790	c0001_00707
fgenesh2_kg.1__1021__AT1G09660.1	AT1G09660	Bra020003	-	Bra030791	c0001_00708
scaffold_101007.1	AT1G09680	Bra020001	-	-	c0001_00709
fgenesh2_kg.1__1025__AT1G09700.1	AT1G09700	Bra019999	-	Bra030793	c0001_00710
fgenesh2_kg.1__1026__AT1G09710.1	AT1G09710	Bra019998	-	-	c0001_00711
fgenesh1_pm.C_scaffold_1000791	AT1G09720	Bra019997	-	-	c0001_00712
fgenesh2_kg.1__1028__AT1G09730.1	AT1G09730	Bra019996	-	Bra030794	c0001_00713
fgenesh2_kg.1__1029__AT1G09740.1	AT1G09740	Bra019995	-	Bra030795	c0001_00714
fgenesh2_kg.1__1030__AT1G09750.1	AT1G09750	-	-	Bra030796	c0001_00715
fgenesh2_kg.1__1031__AT1G09760.1	AT1G09760	Bra019994	Bra031683	Bra030797	c0001_00716
fgenesh2_kg.1__1032__AT1G09770.1	AT1G09770	Bra019993	-	Bra030798	c0001_00717
fgenesh2_kg.1__1033__AT1G09780.1	AT1G09780	-	-	Bra030799	c0001_00718
fgenesh2_kg.1__1034__AT1G09790.1	AT1G09790	Bra019992	-	Bra030800	c0001_00719
fgenesh2_kg.1__1035__AT1G09795.1	AT1G09795	Bra019991	-	-	c0001_00720
fgenesh2_kg.1__1036__AT1G09800.1	AT1G09800	Bra019990	Bra031684	-	c0001_00721
fgenesh2_kg.1__1037__AT1G09810.1	AT1G09810	Bra019988	-	-	c0001_00722
fgenesh1_pg.C_scaffold_1000828	AT1G09812	Bra019987	-	Bra030801	c0056_00029
fgenesh2_kg.1__1039__AT1G09815.1	AT1G09815	Bra019986	-	-	c0056_00028
fgenesh2_kg.1__1040__AT1G09820.1	AT1G09820	Bra019985	-	-	c0056_00027
fgenesh2_kg.1__1041__AT1G09830.1	AT1G09830	Bra019984	-	Bra030802	c0056_00026
fgenesh2_kg.1__1047__AT1G09840.4	AT1G09840	Bra019983	-	Bra030803	c0056_00025
fgenesh2_kg.1__1050__AT1G09850.1	AT1G09850	Bra019982	-	-	c0056_00024
fgenesh1_pg.C_scaffold_1000833	AT1G09860	Bra019981	-	-	c0056_00023
fgenesh1_pm.C_scaffold_1000810	AT1G09870	Bra019980	Bra031686	-	c0056_00022
Al_scaffold_0001_957	AT1G09880	Bra019979	-	Bra030804	c0056_00018
fgenesh2_kg.1__1055__AT1G09900.1	AT1G09900	Bra019977	-	-	c0056_00019
fgenesh1_pg.C_scaffold_1000840	AT1G09930	-	Bra031688	-	c0056_00016
fgenesh1_pm.C_scaffold_1000816	AT1G09932	-	Bra031689	Bra030806	c0056_00014
fgenesh2_kg.1__1059__AT1G09940.1	AT1G09940	-	Bra031690	-	c0056_00012
fgenesh2_kg.1__1060__AT1G09950.1	AT1G09950	Bra019973	Bra031691	-	c0056_00011
fgenesh2_kg.1__1061__AT1G09960.1	AT1G09960	Bra019972	Bra031692	-	c0056_00010
scaffold_101044.1	AT1G09970	Bra019971	Bra031693	Bra018468	c0056_00009
scaffold_101051.1	AT1G09980	Bra019970	Bra031694	-	c0056_00008
scaffold_101052.1	AT1G10010	Bra019969	Bra031697	-	c0056_00006
scaffold_101054.1	AT1G10020	Bra019966	-	Bra018467	c0056_00005
fgenesh2_kg.1__1071__AT1G10040.2	AT1G10040	-	-	Bra018465	c0056_00004
fgenesh2_kg.1__1072__AT1G10050.1	AT1G10050	-	Bra031698	-	c0056_00003
Al_scaffold_0001_981	AT1G10060	Bra019964	Bra031699	Bra018463	c0056_00002
fgenesh2_kg.1__1078__AT1G10090.1	AT1G10090	-	-	Bra018462	c0001_00750
scaffold_101064.1	AT1G10120	Bra019962	Bra031700	Bra018461	c0001_00751
fgenesh2_kg.1__1082__AT1G10130.1	AT1G10130	Bra019960	Bra031701	-	c0001_00752
scaffold_101066.1	AT1G10140	Bra019961	Bra031702	Bra018460	c0001_00753
fgenesh2_kg.1__1084__AT1G10150.1	AT1G10150	-	Bra031703	Bra018459	c0001_00754
fgenesh1_pm.C_scaffold_1000838	AT1G10155	Bra019959	-	-	c0001_00755
fgenesh2_kg.1__1086__AT1G10170.1	AT1G10170	Bra019958	Bra031704	Bra018458	c0001_00756
fgenesh2_kg.1__1088__AT1G10200.1	AT1G10200	Bra019956	-	Bra018454	c0001_00757
Al_scaffold_0001_997	AT1G10220	Bra019954	Bra031705	Bra018453	c0001_00758
fgenesh2_kg.1__1092__AT1G10270.1	AT1G10270	Bra019952	Bra031706	Bra018451	c0001_00761
Al_scaffold_0001_1004	AT1G10280	Bra019951	-	Bra018450	c0001_00762
fgenesh2_kg.1__1094__AT1G10290.1	AT1G10290	Bra019950	Bra031707	Bra018449	c0001_00763
fgenesh2_kg.1__1096__AT1G10310.1	AT1G10310	-	-	Bra018447	c0001_00765
fgenesh2_kg.1__1097__AT1G10320.1	AT1G10320	Bra019944	-	Bra018446	c0001_00766
scaffold_101089.1	AT1G10330	Bra019943	-	-	c0001_00767
fgenesh2_kg.1__1099__AT1G10340.2	AT1G10340	-	-	Bra018444	c0001_00768
fgenesh2_kg.1__1101__AT1G10350.1	AT1G10350	Bra019942	-	Bra018443	c0001_00769
fgenesh2_kg.1__1102__AT1G10360.1	AT1G10360	Bra019940	Bra031708	-	c0001_00770
scaffold_101094.1	AT1G10380	Bra019939	-	-	c0001_00772
fgenesh1_pm.C_scaffold_1000857	AT1G10385	-	-	Bra018442	c0001_00773
fgenesh2_kg.1__1108__AT1G10400.1	AT1G10400	-	-	Bra018440	c0001_00774
fgenesh2_kg.1__1109__AT1G10410.1	AT1G10410	Bra019937	Bra031710	-	c0001_00775
fgenesh2_kg.1__1111__AT1G10420.1	AT1G10417	Bra019936	-	-	c0001_00776
scaffold_101106.1	AT1G10430	Bra019934	Bra031712	-	c0001_00779
fgenesh2_kg.1__1113__AT1G10450.1	AT1G10450	Bra019933	-	-	c0001_00780
scaffold_101110.1	AT1G10470	Bra019932	Bra031714	Bra018439	c0001_00781
fgenesh2_kg.1__1115__AT1G10480.1	AT1G10480	-	Bra031715	Bra018438	c0001_00782
fgenesh1_pm.C_scaffold_1000868	AT1G10490	-	Bra031716	Bra018437	c0001_00783
fgenesh2_kg.1__1117__AT1G10500.1	AT1G10500	Bra019928	-	Bra018436	c0001_00784
fgenesh2_kg.1__1118__AT1G10510.1	AT1G10510	Bra019926	-	Bra018435	c0001_00785
fgenesh2_kg.1__1120__AT1G10522.1	AT1G10522	Bra019925	-	-	c0001_00786
fgenesh2_kg.1__1122__AT1G10530.1	AT1G10530	-	Bra031717	-	c0001_00787
fgenesh2_kg.1__1124__AT1G10550.1	AT1G10550	-	-	Bra018433	c0001_00790
fgenesh2_kg.1__1125__AT1G10560.1	AT1G10560	Bra019924	-	-	c0001_00791
fgenesh2_kg.1__1127__AT1G10570.1	AT1G10570	Bra019923	-	-	c0001_00792
Al_scaffold_0001_1044	AT1G10580	Bra019919	-	-	c0001_00794
fgenesh1_pm.C_scaffold_1000879	AT1G10585	Bra019918	Bra031721	-	c0001_00795
Al_scaffold_0001_1048	AT1G10590	Bra019916	Bra031722	Bra018432	c0001_00796
scaffold_101130.1	AT1G10600	Bra019915	-	-	c0001_00797
fgenesh2_kg.1__1138__AT1G10610.1	AT1G10610	Bra019914	Bra031723	-	c0001_00798
scaffold_101132.1	AT1G10620	Bra019913	Bra031735	Bra018431	c0001_00799
fgenesh2_kg.1__1140__AT1G10640.1	AT1G10640	Bra019912	Bra031724	Bra018429	c0001_00802
fgenesh2_kg.1__1141__AT1G10650.2	AT1G10650	Bra019910	-	Bra018428	c0001_00803
fgenesh2_kg.1__1143__AT1G10657.2	AT1G10657	Bra019909	-	-	c0001_00804
scaffold_101138.1	AT1G10660	Bra019908	-	Bra018426	c0001_00805
fgenesh2_kg.1__1149__AT1G10670.1	AT1G10670	-	-	Bra018425	c0001_00806
scaffold_101141.1	AT1G10690	Bra019906	-	-	c0001_00810
fgenesh1_pm.C_scaffold_1000893	AT1G10700	Bra019905	-	-	c0001_00811
Al_scaffold_0001_1062	AT1G10710	-	Bra031754	-	c0380_00004
fgenesh2_kg.1__1156__AT1G10720.1	AT1G10720	-	Bra031753	-	c0001_00812
scaffold_101153.1	AT1G10730	Bra019904	Bra031752	-	c0001_00813
fgenesh2_kg.1__1160__AT1G10740.1	AT1G10740	-	Bra031751	Bra018424	c0001_00825
scaffold_101161.1	AT1G10750	-	Bra031750	-	c0001_00826
scaffold_101162.1	AT1G10760	-	Bra031749	Bra018423	c0001_00815
fgenesh2_kg.1__1166__AT1G10770.1	AT1G10770	Bra019903	Bra031748	Bra018422	c0001_00816
fgenesh2_kg.1__1167__AT1G10780.1	AT1G10780	-	Bra031747	-	c0001_00817
fgenesh1_pm.C_scaffold_1000903	AT1G10790	Bra019902	-	-	c0001_00818
scaffold_101166.1	AT1G10800	Bra019901	-	-	c0001_00819
scaffold_101171.1	AT1G10840	Bra019898	Bra031745	Bra018420	c0001_00822
fgenesh2_kg.1__1177__AT1G10850.1	AT1G10850	Bra019897	-	-	c0001_00823
scaffold_101174.1	AT1G10870	Bra019896	-	-	c0001_00824
fgenesh1_pm.C_scaffold_1000913	AT1G10880	Bra019894	-	Bra018419	c0001_00827
fgenesh1_pm.C_scaffold_1000915	AT1G10890	Bra019893	-	-	c0001_00828
fgenesh2_kg.1__1183__AT1G10900.1	AT1G10900	Bra019892	Bra031742	-	c0001_00829
scaffold_101182.1	AT1G10910	Bra019891	Bra031731	-	c0001_00830
scaffold_101184.1	AT1G10940	Bra019890	Bra031740	Bra018417	c0001_00831
fgenesh2_kg.1__1187__AT1G10950.1	AT1G10950	Bra019888	Bra031739	Bra018416	c0001_00832
fgenesh2_kg.1__1188__AT1G10960.1	AT1G10960	-	-	Bra018415	c0001_00833
scaffold_101187.1	AT1G10970	-	Bra031738	-	c0001_00834
fgenesh2_kg.1__1191__AT1G11020.1	AT1G11020	-	Bra031736	Bra018414	c0001_00835
Al_scaffold_0001_1104	AT1G11040	Bra019886	-	Bra018413	c0001_00836
Al_scaffold_0001_1106	AT1G11060	Bra019885	Bra031734	-	c0001_00838
fgenesh2_kg.1__1195__AT1G11070.1	AT1G11070	Bra019884	Bra031733	-	c0001_00839
fgenesh2_kg.1__1196__AT1G11080.1	AT1G11080	Bra019883	-	-	c0001_00840
scaffold_101196.1	AT1G11090	Bra019882	-	-	c0001_00841
fgenesh2_kg.1__1200__AT1G11112.1	AT1G11112	Bra019881	-	-	c0001_00842
fgenesh2_kg.1__1201__AT1G11120.1	AT1G11120	Bra019880	Bra031732	Bra016852	c0001_00844
scaffold_101201.1	AT1G11130	Bra019878	Bra031727	-	c0001_00845
fgenesh2_kg.1__1204__AT1G11160.1	AT1G11160	-	Bra031757	-	c0001_00846
Al_scaffold_0001_1120	AT1G11170	Bra019877	-	Bra016851	c0001_00847
fgenesh2_kg.1__1207__AT1G11180.1	AT1G11180	Bra019876	-	-	c0001_00848
fgenesh2_kg.1__1208__AT1G11190.1	AT1G11190	-	Bra031758	Bra016849	c0001_00849
fgenesh2_kg.1__1209__AT1G11200.1	AT1G11200	-	-	Bra016848	c0001_00850
Al_scaffold_0001_1125	AT1G11210	Bra019875	-	-	c0001_00851
fgenesh2_kg.1__1212__AT1G11240.1	AT1G11240	Bra019873	-	Bra016847	c0001_00853
fgenesh1_pm.C_scaffold_1000945	AT1G11250	Bra019872	Bra031761	Bra016846	c0001_00854
scaffold_101218.1	AT1G11260	Bra019870	Bra031762	-	c0001_00856
fgenesh2_kg.1__1218__AT1G11280.2	AT1G11280	-	-	Bra016842	c0001_00857
fgenesh2_kg.1__1220__AT1G11310.1	AT1G11310	Bra019869	Bra031763	Bra016840	c0001_00859
fgenesh2_kg.1__1222__AT1G11320.1	AT1G11320	Bra019868	-	Bra016839	c0001_00860
fgenesh2_kg.1__1223__AT1G11330.1	AT1G11330	Bra019865	Bra031766	-	c0001_00861
Al_scaffold_0001_1146	AT1G11360	Bra019861	-	-	c0001_00863
fgenesh2_kg.1__1228__AT1G11380.1	AT1G11380	Bra019860	-	-	c0001_00864
scaffold_101236.1	AT1G11390	Bra019859	Bra031767	-	c0001_00865
fgenesh2_kg.1__1230__AT1G11400.2	AT1G11400	Bra019858	-	Bra016837	c0001_00866
fgenesh2_kg.1__1233__AT1G11410.1	AT1G11410	Bra019843	-	Bra016836	c0001_00868
fgenesh2_kg.1__1234__AT1G11430.1	AT1G11430	Bra019853	-	Bra016835	c0001_00870
fgenesh2_kg.1__1235__AT1G11440.1	AT1G11440	Bra019852	-	Bra016834	c0001_00871
fgenesh2_kg.1__1238__AT1G11475.1	AT1G11475	Bra019851	-	Bra016833	c0261_00002
fgenesh1_pm.C_scaffold_1000960	AT1G11480	Bra019850	-	-	c0001_00872
fgenesh1_pm.C_scaffold_1000961	AT1G11490	Bra019849	-	-	c0001_00874
fgenesh1_pg.C_scaffold_1001008	AT1G11500	Bra019848	Bra031768	-	c0001_00875
scaffold_101250.1	AT1G11510	Bra019847	-	-	c0001_00876
fgenesh2_kg.1__1243__AT1G11530.1	AT1G11530	-	Bra031769	-	c0001_00877
fgenesh2_kg.1__1244__AT1G11545.1	AT1G11545	Bra019846	-	-	c0001_00878
fgenesh1_pg.C_scaffold_1001013	AT1G11560	-	-	Bra016832	c0001_00879
fgenesh2_kg.1__1247__AT1G11580.1	AT1G11580	-	Bra031771	-	c0001_00881
fgenesh2_kg.1__1252__AT1G11600.1	AT1G11600	-	Bra031773	Bra016828	c0001_00884
fgenesh2_kg.1__1254__AT1G11630.1	AT1G11630	Bra019842	-	-	c0001_00885
fgenesh2_kg.1__1255__AT1G11650.2	AT1G11650	-	Bra031774	-	c0001_00886
scaffold_101272.1	AT1G11660	Bra019840	-	Bra016825	c0001_00888
fgenesh2_kg.1__1260__AT1G11670.1	AT1G11670	-	Bra031776	Bra016824	c0001_00889
fgenesh2_kg.1__1261__AT1G11680.1	AT1G11680	Bra019839	-	Bra016822	c0001_00890
scaffold_101275.1	AT1G11690	Bra019838	-	Bra016819	c0001_00891
fgenesh2_kg.1__1263__AT1G11700.1	AT1G11700	Bra019837	-	-	c0001_00892
Al_scaffold_0001_1186	AT1G11730	Bra019835	-	-	c0001_00894
fgenesh1_pm.C_scaffold_1000982	AT1G11740	Bra019833	-	Bra016817	c0001_00895
fgenesh2_kg.1__1268__AT1G11750.1	AT1G11750	-	Bra031777	Bra016816	c0001_00896
Al_scaffold_0001_1189	AT1G11760	-	-	Bra016814	c0001_00897
fgenesh2_kg.1__1271__AT1G11765.1	AT1G11765	-	Bra031779	-	c0001_00898
fgenesh2_kg.1__1272__AT1G11770.1	AT1G11770	Bra019831	Bra031780	-	c0001_00899
scaffold_101287.1	AT1G11780	-	Bra031781	-	c0001_00900
scaffold_101288.1	AT1G11790	Bra019830	-	Bra016813	c0001_00901
scaffold_101289.1	AT1G11800	-	Bra031783	-	c0001_00902
Al_scaffold_0001_1195	AT1G11820	-	-	Bra016812	c0129_00014
scaffold_101291.1	AT1G11840	-	-	Bra016811	c0001_00903
fgenesh2_kg.1__1285__AT1G11860.2	AT1G11860	-	Bra031785	Bra016810	c0001_00905
fgenesh2_kg.1__1288__AT1G11870.2	AT1G11870	-	Bra031786	Bra016808	c0001_00907
fgenesh2_kg.1__1290__AT1G11880.1	AT1G11880	-	Bra031787	Bra016807	c0001_00908
scaffold_101295.1	AT1G11890	Bra019723	Bra031788	Bra016806	c0001_00909
fgenesh2_kg.1__1292__AT1G11900.1	AT1G11900	Bra019724	-	-	c0001_00910
fgenesh2_kg.1__1294__AT1G11910.1	AT1G11910	Bra019727	Bra031790	Bra016805	c0001_00914
fgenesh2_kg.1__1295__AT1G11915.1	AT1G11915	Bra019728	-	Bra016804	c0001_00915
fgenesh1_pm.C_scaffold_1001001	AT1G11920	Bra019730	-	-	c0001_00916
fgenesh2_kg.1__1297__AT1G11925.1	AT1G11925	-	Bra031796	-	c0001_00917
scaffold_101303.1	AT1G11930	-	-	Bra016803	c0001_00918
fgenesh1_pm.C_scaffold_1001004	AT1G11940	-	Bra031797	Bra016802	c0001_00919
fgenesh2_kg.1__1301__AT1G11950.1	AT1G11950	-	-	Bra016801	c0001_00920
fgenesh1_pm.C_scaffold_1001006	AT1G11960	Bra019731	-	-	c0001_00921
fgenesh2_kg.1__1302__AT1G11990.1	AT1G11990	Bra019732	-	-	c0001_00922
scaffold_101310.1	AT1G12000	Bra019733	-	Bra016799	c0001_00923
Al_scaffold_0001_1215	AT1G12010	Bra019734	Bra031798	-	c0001_00924
fgenesh2_kg.1__1306__AT1G12030.1	AT1G12030	Bra019736	-	Bra016797	c0001_00925
fgenesh1_pm.C_scaffold_1001011	AT1G12040	Bra019737	Bra026996	Bra016796	c0001_00926
fgenesh2_kg.1__1307__AT1G12050.1	AT1G12050	Bra019738	-	-	c0001_00927
fgenesh2_kg.1__1308__AT1G12060.1	AT1G12060	-	-	Bra016795	c0001_00928
fgenesh2_kg.1__1309__AT1G12064.1	AT1G12064	Bra019739	Bra026995	Bra016794	c0001_00929
fgenesh1_pg.C_scaffold_1001065	AT1G12070	Bra019740	Bra026994	Bra016793	c0001_00930
fgenesh2_kg.1__1313__AT1G12090.1	AT1G12090	Bra019742	-	Bra016790	c0001_00932
scaffold_101325.1	AT1G12110	Bra019744	Bra026991	Bra016789	c0001_00934
fgenesh2_kg.1__1315__AT1G12120.1	AT1G12120	Bra019746	Bra026990	Bra016788	c0079_00018
Al_scaffold_0001_1233	AT1G12150	-	Bra026987	Bra016786	c0079_00016
scaffold_101335.1	AT1G12200	Bra019747	Bra026986	-	c0079_00015
scaffold_101339.1	AT1G12240	Bra019749	Bra026984	-	c0079_00013
fgenesh2_kg.1__1327__AT1G12244.1	AT1G12244	-	Bra026983	-	c0079_00012
fgenesh2_kg.1__1329__AT1G12250.1	AT1G12250	-	Bra026982	-	c0079_00011
fgenesh2_kg.1__1330__AT1G12260.1	AT1G12260	Bra019750	Bra026981	Bra016783	c0079_00010
Al_scaffold_0001_1245	AT1G12270	-	Bra026980	-	c0079_00009
fgenesh1_pm.C_scaffold_1001035	AT1G12280	Bra019755	Bra026977	Bra016781	c0079_00007
scaffold_101348.1	AT1G12310	Bra019756	Bra026976	-	c0079_00005
fgenesh2_kg.1__1335__AT1G12320.1	AT1G12320	Bra019758	Bra026975	Bra016780	c0079_00004
fgenesh2_kg.1__1336__AT1G12330.1	AT1G12330	Bra019759	-	Bra016777	c0079_00003
fgenesh2_kg.1__1338__AT1G12360.1	AT1G12360	Bra019760	Bra026974	-	c0079_00002
fgenesh2_kg.1__1339__AT1G12370.2	AT1G12370	-	-	Bra016776	c0079_00001
scaffold_101355.1	AT1G12380	Bra019761	Bra026973	Bra016775	c0001_00952
scaffold_101356.1	AT1G12390	Bra019762	-	Bra016774	c0001_00953
fgenesh2_kg.1__1344__AT1G12400.1	AT1G12400	Bra019763	-	-	c0193_00006
fgenesh2_kg.1__1345__AT1G12410.1	AT1G12410	Bra019764	Bra026972	-	c0001_00954
fgenesh2_kg.1__1346__AT1G12420.1	AT1G12420	Bra019765	-	Bra016773	c0001_00955
fgenesh2_kg.1__1347__AT1G12430.1	AT1G12430	Bra019766	-	-	c0001_00956
fgenesh2_kg.1__1348__AT1G12440.1	AT1G12440	-	Bra026970	-	c0001_00957
fgenesh2_kg.1__1349__AT1G12450.1	AT1G12450	Bra019767	Bra026969	Bra016771	c0001_00958
fgenesh1_pg.C_scaffold_1001102	AT1G12470	Bra019769	-	Bra016770	c0001_00959
fgenesh2_kg.1__1352__AT1G12480.1	AT1G12480	Bra019770	-	-	c0001_00960
fgenesh2_kg.1__1353__AT1G12500.1	AT1G12500	Bra019771	-	Bra016769	c0001_00961
fgenesh2_kg.1__1356__AT1G12520.1	AT1G12520	-	Bra026968	Bra016768	c0001_00962
Al_scaffold_0001_1271	AT1G12530	Bra019772	-	-	c0001_00963
fgenesh2_kg.1__1357__AT1G12540.1	AT1G12540	Bra019773	-	-	c0001_00964
fgenesh2_kg.1__1358__AT1G12550.1	AT1G12550	Bra019774	Bra026966	-	c0001_00965
fgenesh1_pm.C_scaffold_1001058	AT1G12560	Bra019775	Bra026965	Bra016767	c0001_00967
Al_scaffold_0001_1275	AT1G12570	-	-	Bra016766	c0001_00969
fgenesh2_kg.1__1361__AT1G12580.1	AT1G12580	-	Bra026964	Bra016765	c0001_00970
scaffold_101377.1	AT1G12600	-	-	Bra016764	c0001_00971
fgenesh2_kg.1__1363__AT1G12610.1	AT1G12610	Bra019777	Bra026963	Bra016761	c0001_00972
Al_scaffold_0001_1280	AT1G12640	Bra019778	-	-	c0001_00975
fgenesh2_kg.1__1366__AT1G12650.3	AT1G12650	-	Bra026962	-	c0001_00976
Al_scaffold_0001_1290	AT1G12660	-	Bra026960	-	c0001_00977
Al_scaffold_0001_1291	AT1G12663	Bra019779	-	-	c0001_00978
fgenesh1_pm.C_scaffold_1001073	AT1G12740	Bra019782	Bra026956	-	c0001_00981
fgenesh2_kg.1__1381__AT1G12750.2	AT1G12750	Bra019783	-	-	c0001_00982
fgenesh2_kg.1__1383__AT1G12760.2	AT1G12760	Bra019784	Bra026955	Bra016759	c0001_00983
fgenesh2_kg.1__1384__AT1G12770.1	AT1G12770	-	-	Bra016758	c0001_00984
fgenesh2_kg.1__1385__AT1G12780.1	AT1G12780	Bra019785	-	Bra016757	c0001_00985
fgenesh2_kg.1__1386__AT1G12790.1	AT1G12790	Bra019786	-	-	c0001_00986
scaffold_101424.1	AT1G12800	Bra019788	-	-	c0001_00987
fgenesh2_kg.1__1388__AT1G12805.1	AT1G12805	Bra019791	-	Bra016756	c0001_00988
scaffold_101427.1	AT1G12820	-	Bra026953	Bra016754	c0001_00990
fgenesh2_kg.1__1391__AT1G12830.1	AT1G12830	-	Bra026952	Bra016753	c0001_00991
fgenesh2_kg.1__1392__AT1G12840.1	AT1G12840	Bra019792	Bra026951	Bra016752	c0001_00992
fgenesh1_pg.C_scaffold_1001155	AT1G12850	-	-	Bra016750	c0001_00994
Al_scaffold_0001_1326	AT1G12860	Bra019794	Bra026950	Bra016749	c0001_00995
fgenesh2_kg.1__1396__AT1G12890.1	AT1G12890	-	Bra026949	-	c0001_00996
fgenesh2_kg.1__1397__AT1G12900.1	AT1G12900	Bra019722	Bra026948	-	c0001_00997
scaffold_101437.1	AT1G12910	Bra019798	Bra026947	-	c0001_00998
scaffold_101438.1	AT1G12920	-	-	Bra016748	c0001_00999
fgenesh2_kg.1__1401__AT1G12930.1	AT1G12930	Bra019800	Bra026946	-	c0001_01000
fgenesh2_kg.1__1405__AT1G12970.1	AT1G12970	-	Bra026944	-	c0001_01003
scaffold_101444.1	AT1G12980	Bra019801	Bra026942	-	c0001_01004
scaffold_101445.1	AT1G12990	Bra019802	-	Bra016746	c0001_01005
scaffold_101446.1	AT1G13000	Bra019803	-	-	c0001_01006
fgenesh2_kg.1__1410__AT1G13030.1	AT1G13030	Bra019804	Bra026939	-	c0001_01007
scaffold_101454.1	AT1G13060	Bra019807	Bra026938	-	c0001_01009
fgenesh2_kg.1__1415__AT1G13080.1	AT1G13080	Bra019809	Bra026933	Bra016740	c0001_01010
scaffold_101463.1	AT1G13120	Bra019810	Bra026928	-	c0001_01013
fgenesh2_kg.1__1420__AT1G13130.1	AT1G13130	Bra019811	Bra026925	-	c0001_01014
fgenesh2_kg.1__1421__AT1G13140.1	AT1G13140	Bra019812	-	Bra016739	c0001_01015
fgenesh2_kg.1__1423__AT1G13160.1	AT1G13160	-	Bra026921	-	c0001_01016
fgenesh2_kg.1__1424__AT1G13170.1	AT1G13170	Bra019814	-	-	c0001_01017
fgenesh2_kg.1__1425__AT1G13180.1	AT1G13180	Bra019815	-	Bra016738	c0001_01018
fgenesh2_kg.1__1426__AT1G13190.1	AT1G13190	Bra019816	-	-	c0001_01019
fgenesh2_kg.1__1428__AT1G13195.1	AT1G13195	Bra019817	Bra026920	-	c0001_01020
fgenesh2_kg.1__1429__AT1G13200.1	AT1G13200	-	Bra026918	Bra016737	c0525_00003
fgenesh2_kg.1__1430__AT1G13210.1	AT1G13210	Bra019818	Bra026919	-	c0001_01021
fgenesh2_kg.1__1434__AT1G13250.1	AT1G13250	Bra019820	-	-	c0001_01024
scaffold_101479.1	AT1G13260	Bra019821	Bra026917	-	c0001_01025
fgenesh2_kg.1__1437__AT1G13270.1	AT1G13270	-	Bra026916	-	c0001_01026
fgenesh1_pg.C_scaffold_1001192	AT1G13280	-	-	Bra016735	c0001_01027
fgenesh2_kg.1__1438__AT1G13290.1	AT1G13290	Bra019822	-	-	c0001_01028
scaffold_101490.1	AT1G13300	Bra019824	-	Bra016734	c0001_01029
fgenesh1_pg.C_scaffold_1001201	AT1G13330	Bra019825	-	-	c0001_01032
fgenesh2_kg.1__1444__AT1G13340.1	AT1G13340	Bra019826	Bra026912	Bra016733	c0001_01033
scaffold_101496.1	AT1G13360	Bra019827	-	Bra016732	c0001_01034
fgenesh2_kg.1__1446__AT1G13380.1	AT1G13380	Bra019828	-	-	c0001_01035
fgenesh2_kg.1__1447__AT1G13390.2	AT1G13390	Bra019829	Bra026907	Bra016731	c0001_01036
scaffold_101502.1	AT1G13410	-	-	Bra016730	c0001_01038
fgenesh2_kg.1__1453__AT1G13440.1	AT1G13440	-	Bra026904	Bra016729	c0001_01039
scaffold_101505.1	AT1G13450	Bra019721	Bra026903	-	c0001_01040
fgenesh2_kg.1__1458__AT1G13460.2	AT1G13460	Bra019720	-	-	c0001_01041
fgenesh2_kg.1__1460__AT1G13470.1	AT1G13470	Bra019719	Bra026900	Bra016727	c0001_01042
fgenesh2_kg.1__1469__AT1G13560.1	AT1G13560	Bra019718	Bra026899	-	c0142_00007
fgenesh2_kg.1__1470__AT1G13570.1	AT1G13570	Bra019717	-	-	c0142_00008
fgenesh2_kg.1__1471__AT1G13580.2	AT1G13580	-	Bra026898	-	c0142_00009
fgenesh2_kg.1__1473__AT1G13590.1	AT1G13590	Bra019716	Bra026897	-	c0001_01044
scaffold_101520.1	AT1G13600	Bra019715	Bra026895	-	c0001_01045
fgenesh2_kg.1__1476__AT1G13610.1	AT1G13610	Bra019712	-	-	c0142_00015
fgenesh2_kg.1__1478__AT1G13620.1	AT1G13620	Bra040728	-	-	c0508_00001
Al_scaffold_0001_1407	AT1G13630	Bra040726	-	-	c0508_00002
fgenesh2_kg.1__1480__AT1G13635.1	AT1G13635	Bra040725	-	-	c0001_01069
fgenesh2_kg.1__1481__AT1G13640.1	AT1G13640	Bra040724	-	-	c0001_01068
fgenesh2_kg.1__1483__AT1G13690.1	AT1G13690	Bra040722	-	-	c0001_01064
scaffold_101535.1	AT1G13700	Bra040721	Bra026893	-	c0001_01063
fgenesh2_kg.1__1485__AT1G13710.1	AT1G13710	Bra040720	Bra026892	-	c0001_01062
fgenesh2_kg.1__1486__AT1G13730.1	AT1G13730	Bra019707	-	-	c0001_01061
fgenesh2_kg.1__1487__AT1G13740.1	AT1G13740	Bra019706	Bra026891	-	c0001_01060
Al_scaffold_0001_1419	AT1G13750	Bra019705	Bra026890	-	c0001_01059
scaffold_101545.1	AT1G13800	Bra019702	Bra026927	-	c0001_01057
fgenesh2_kg.1__1496__AT1G13830.1	AT1G13830	Bra019700	Bra026878	Bra016724	c0001_01055
fgenesh2_kg.1__1502__AT1G13880.1	AT1G13880	-	Bra026876	Bra016722	c0001_01053
fgenesh1_pg.C_scaffold_1001248	AT1G13890	-	Bra026875	-	c0001_01052
scaffold_101554.1	AT1G13900	Bra019699	Bra026874	Bra016721	c0001_01051
fgenesh2_kg.1__1505__AT1G13910.1	AT1G13910	-	Bra026823	-	c0001_01050
fgenesh2_kg.1__1507__AT1G13930.1	AT1G13930	-	-	Bra016718	c0001_01049
fgenesh1_pm.C_scaffold_1001177	AT1G13940	-	Bra026871	Bra016717	c0001_01048
fgenesh2_kg.1__1511__AT1G13960.1	AT1G13960	Bra019697	Bra026869	Bra016716	c0001_01073
fgenesh2_kg.1__1512__AT1G13970.1	AT1G13970	Bra019696	Bra026868	-	c0001_01074
Al_scaffold_0001_1446	AT1G13990	Bra019693	-	-	c0001_01075
fgenesh2_kg.1__1515__AT1G14000.1	AT1G14000	Bra019692	Bra026867	-	c0001_01076
scaffold_101566.1	AT1G14010	-	Bra026866	Bra016715	c0001_01077
fgenesh2_kg.1__1517__AT1G14020.1	AT1G14020	Bra019691	-	Bra016714	c0001_01078
fgenesh2_kg.1__1518__AT1G14030.1	AT1G14030	-	Bra026865	-	c0001_01079
fgenesh1_pm.C_scaffold_1001188	AT1G14060	-	Bra026862	Bra016713	c0001_01081
fgenesh1_pg.C_scaffold_1001271	AT1G14120	Bra019678	Bra026856	Bra016708	c0001_01086
fgenesh2_kg.1__1528__AT1G14150.1	AT1G14150	Bra019675	Bra026854	-	c0001_01088
scaffold_101584.1	AT1G14160	-	Bra026853	-	c0001_01089
fgenesh2_kg.1__1532__AT1G14170.3	AT1G14170	Bra019674	Bra026852	-	c0001_01090
fgenesh1_pm.C_scaffold_1001196	AT1G14180	Bra019673	Bra026851	-	c0001_01091
fgenesh1_pg.C_scaffold_1001278	AT1G14185	-	Bra026850	-	c0001_01092
scaffold_101589.1	AT1G14200	Bra019672	Bra026849	-	c0001_01093
fgenesh2_kg.1__1536__AT1G14205.1	AT1G14205	-	Bra026848	-	c0001_01094
fgenesh2_kg.1__1537__AT1G14210.1	AT1G14210	-	Bra026846	-	c0001_01095
Al_scaffold_0001_1470	AT1G14230	Bra019670	Bra026841	-	c0001_01097
fgenesh2_kg.1__1546__AT1G14260.1	AT1G14260	Bra019668	Bra026840	-	c0001_01100
fgenesh2_kg.1__1549__AT1G14270.1	AT1G14270	Bra019667	-	Bra016707	c0001_01101
scaffold_101597.1	AT1G14280	Bra019666	-	-	c0001_01102
fgenesh1_pm.C_scaffold_1001209	AT1G14310	Bra019663	-	-	c0001_01104
scaffold_101601.1	AT1G14320	Bra019662	Bra026839	Bra016706	c0001_01105
fgenesh2_kg.1__1557__AT1G14330.1	AT1G14330	-	Bra026838	-	c0001_01106
fgenesh1_pm.C_scaffold_1001212	AT1G14340	Bra019660	-	Bra016705	c0001_01107
fgenesh2_kg.1__1561__AT1G14350.1	AT1G14350	Bra019658	Bra026837	-	c0001_01110
scaffold_101606.1	AT1G14360	Bra019657	Bra026835	-	c0001_01111
fgenesh2_kg.1__1562__AT1G14370.1	AT1G14370	Bra026223	Bra026834	-	c0001_01112
Al_scaffold_0001_1485	AT1G14380	Bra019653	-	-	c0001_01113
fgenesh2_kg.1__1568__AT1G14400.1	AT1G14400	Bra026222	Bra026833	Bra016703	c0001_01115
fgenesh2_kg.1__1569__AT1G14410.1	AT1G14410	-	-	Bra016702	c0001_01116
fgenesh2_kg.1__1570__AT1G14420.1	AT1G14420	Bra026221	Bra026832	Bra016700	c0001_01117
scaffold_101614.1	AT1G14430	Bra026220	Bra026831	Bra016701	c0001_01118
scaffold_101615.1	AT1G14440	Bra026219	Bra026830	-	c0001_01119
fgenesh2_kg.1__1574__AT1G14450.1	AT1G14450	Bra026218	Bra026829	-	c0001_01120
fgenesh2_kg.1__1577__AT1G14490.1	AT1G14490	Bra026211	-	-	c0001_01122
fgenesh2_kg.1__1579__AT1G14510.1	AT1G14510	Bra026210	Bra026825	Bra016698	c0001_01123
scaffold_101629.1	AT1G14520	Bra026209	-	-	c0001_01124
fgenesh2_kg.1__1582__AT1G14530.2	AT1G14530	Bra026208	-	-	c0001_01125
scaffold_101631.1	AT1G14540	Bra026207	Bra026822	-	c0001_01126
scaffold_101633.1	AT1G14560	Bra026206	-	Bra016697	c0001_01127
scaffold_101634.1	AT1G14570	Bra026205	-	-	c0001_01128
fgenesh1_pm.C_scaffold_1001236	AT1G14580	Bra026204	Bra026819	Bra016694	c0001_01129
fgenesh2_kg.1__1592__AT1G14600.1	AT1G14600	Bra026202	Bra026818	-	c0001_01131
fgenesh2_kg.1__1593__AT1G14610.1	AT1G14610	Bra026200	Bra026816	Bra016693	c0001_01133
fgenesh2_kg.1__1599__AT1G14660.1	AT1G14660	Bra026197	-	-	c0001_01135
Al_scaffold_0001_1517	AT1G14670	-	-	Bra016687	c0001_01138
scaffold_101644.1	AT1G14680	-	Bra026814	-	c0001_01139
fgenesh2_kg.1__1602__AT1G14685.1	AT1G14685	Bra026196	Bra026813	Bra016686	c0001_01140
scaffold_101646.1	AT1G14686	Bra026195	-	-	c0001_01141
fgenesh2_kg.1__1606__AT1G14687.1	AT1G14687	-	Bra026812	-	c0001_01142
fgenesh1_pm.C_scaffold_1001247	AT1G14690	-	Bra026811	-	c0001_01143
fgenesh2_kg.1__1612__AT1G14710.1	AT1G14710	Bra026194	Bra026810	Bra016682	c0001_01145
fgenesh2_kg.1__1613__AT1G14720.1	AT1G14720	-	Bra026809	-	c0001_01146
fgenesh2_kg.1__1614__AT1G14730.1	AT1G14730	Bra026193	Bra026808	-	c0001_01147
fgenesh2_kg.1__1615__AT1G14740.1	AT1G14740	Bra026192	-	-	c0001_01148
fgenesh2_kg.1__1616__AT1G14750.1	AT1G14750	Bra026191	Bra026807	Bra016681	c0001_01149
fgenesh1_pm.C_scaffold_1001255	AT1G14760	Bra026190	Bra026805	-	c0001_01150
fgenesh2_kg.1__1620__AT1G14770.1	AT1G14770	Bra026189	-	-	c0001_01151
fgenesh2_kg.1__1622__AT1G14780.1	AT1G14780	Bra026188	Bra026804	-	c0001_01152
fgenesh2_kg.1__1623__AT1G14790.1	AT1G14790	Bra026187	-	-	c0001_01153
fgenesh1_pm.C_scaffold_1001259	AT1G14810	Bra026186	-	Bra016680	c0001_01155
fgenesh2_kg.1__1629__AT1G14840.1	AT1G14840	Bra026184	Bra026800	-	c0001_01157
fgenesh2_kg.1__1631__AT1G14860.1	AT1G14860	Bra026182	Bra026797	-	c0001_01159
Al_scaffold_0001_1541	AT1G14870	Bra026181	Bra026794	-	c0001_01160
fgenesh2_kg.1__1632__AT1G14890.1	AT1G14890	Bra026180	-	Bra016678	c0001_01162
fgenesh2_kg.1__1639__AT1G14970.1	AT1G14970	Bra026174	Bra026790	-	c0001_01165
fgenesh2_kg.1__1640__AT1G14980.1	AT1G14980	Bra026173	Bra026789	Bra016677	c0001_01166
fgenesh2_kg.1__1641__AT1G14990.1	AT1G14990	Bra026172	Bra026788	-	c0001_01167
scaffold_101687.1	AT1G15000	Bra026171	Bra026787	-	c0001_01168
fgenesh2_kg.1__1643__AT1G15010.1	AT1G15010	Bra026170	-	Bra016675	c0001_01169
fgenesh2_kg.1__1645__AT1G15020.2	AT1G15020	Bra026169	Bra026786	-	c0001_01170
scaffold_101690.1	AT1G15030	Bra026168	Bra026785	-	c0001_01171
fgenesh2_kg.1__1648__AT1G15040.1	AT1G15040	Bra026167	Bra026784	-	c0001_01172
scaffold_101693.1	AT1G15060	-	Bra026783	Bra016674	c0001_01173
fgenesh2_kg.1__1653__AT1G15110.1	AT1G15110	-	Bra026780	-	c0001_01174
Al_scaffold_0001_1569	AT1G15120	Bra026164	-	Bra016673	c0001_01175
fgenesh2_kg.1__1656__AT1G15130.1	AT1G15130	Bra026162	Bra026779	-	c0001_01176
scaffold_101699.1	AT1G15140	Bra026161	-	Bra016672	c0001_01177
fgenesh2_kg.1__1660__AT1G15150.1	AT1G15150	Bra026160	Bra026778	Bra016671	c0001_01178
fgenesh2_kg.1__1665__AT1G15190.1	AT1G15190	Bra026159	-	Bra016670	c0001_01179
fgenesh2_kg.1__1666__AT1G15200.1	AT1G15200	Bra026158	Bra026777	-	c0001_01180
fgenesh2_kg.1__1667__AT1G15210.1	AT1G15210	Bra026157	-	Bra016669	c0001_01181
fgenesh1_pg.C_scaffold_1001378	AT1G15215	Bra026155	-	-	c0001_01182
Al_scaffold_0001_1582	AT1G15240	Bra026152	Bra026776	-	c0001_01184
fgenesh2_kg.1__1677__AT1G15280.2	AT1G15280	Bra026148	-	Bra016666	c0001_01185
fgenesh1_pm.C_scaffold_1001301	AT1G15290	Bra026147	-	-	c0001_01186
Al_scaffold_0001_1589	AT1G15310	Bra026145	-	-	c0001_01188
scaffold_101717.1	AT1G15320	Bra026144	-	-	c0001_01189
fgenesh1_pm.C_scaffold_1001304	AT1G15330	Bra026143	-	-	c0001_01190
fgenesh1_pm.C_scaffold_1001305	AT1G15340	-	Bra026773	Bra016665	c0001_01191
fgenesh2_kg.1__1687__AT1G15360.1	AT1G15360	Bra026140	Bra026770	Bra016663	c0001_01192
fgenesh2_kg.1__1688__AT1G15370.1	AT1G15370	Bra026139	Bra026769	-	c0001_01193
scaffold_101723.1	AT1G15380	Bra026138	Bra026768	Bra016662	c0001_01194
scaffold_101724.1	AT1G15385	Bra026137	Bra026767	Bra016661	c0001_01195
fgenesh1_pg.C_scaffold_1001391	AT1G15390	Bra026135	Bra026766	-	c0001_01196
fgenesh2_kg.1__1694__AT1G15400.2	AT1G15400	Bra026134	Bra026765	-	c0001_01197
fgenesh2_kg.1__1695__AT1G15410.1	AT1G15410	Bra026133	-	-	c0001_01199
fgenesh1_pm.C_scaffold_1001313	AT1G15415	Bra026132	-	Bra016660	c0001_01200
fgenesh2_kg.1__1697__AT1G15420.1	AT1G15420	Bra026131	Bra026763	Bra016659	c0001_01201
fgenesh2_kg.1__1698__AT1G15430.1	AT1G15430	Bra026130	Bra026761	Bra016658	c0001_01202
scaffold_101731.1	AT1G15440	Bra026129	-	Bra016657	c0001_01203
fgenesh2_kg.1__1703__AT1G15480.1	AT1G15480	Bra026128	-	-	c0001_01205
fgenesh2_kg.1__1704__AT1G15490.1	AT1G15490	Bra026127	-	-	c0001_01206
fgenesh2_kg.1__1705__AT1G15500.1	AT1G15500	Bra026126	-	Bra016656	c0001_01207
fgenesh2_kg.1__1706__AT1G15510.1	AT1G15510	Bra026125	-	-	c0001_01208
fgenesh2_kg.1__1707__AT1G15520.1	AT1G15520	Bra026124	Bra026759	-	c0001_01209
scaffold_101739.1	AT1G15530	-	Bra026758	-	c0001_01210
Al_scaffold_0001_1614	AT1G15540	Bra026123	-	-	c0001_01211
fgenesh2_kg.1__1710__AT1G15550.1	AT1G15550	Bra026122	Bra026757	-	c0001_01212
fgenesh2_kg.1__1711__AT1G15570.1	AT1G15570	Bra026120	Bra026756	Bra016654	c0001_01215
fgenesh2_kg.1__1712__AT1G15580.1	AT1G15580	-	Bra026755	-	c0001_01216
fgenesh2_kg.1__1715__AT1G15670.1	AT1G15670	Bra026116	Bra026753	-	c0001_01218
scaffold_101753.1	AT1G15690	Bra026115	-	Bra016653	c0001_01219
scaffold_101754.1	AT1G15700	-	-	Bra016652	c0001_01220
scaffold_101755.1	AT1G15710	-	Bra026752	-	c0001_01221
scaffold_101757.1	AT1G15730	Bra026114	-	-	c0001_01222
fgenesh2_kg.1__1723__AT1G15740.1	AT1G15740	Bra026113	-	-	c0001_01223
fgenesh2_kg.1__1727__AT1G15750.2	AT1G15750	Bra026112	Bra026751	-	c0001_01224
Al_scaffold_0001_1634	AT1G15757	-	Bra026750	-	c0001_01225
fgenesh2_kg.1__1728__AT1G15760.1	AT1G15760	Bra026110	-	-	c0001_01226
fgenesh2_kg.1__1729__AT1G15770.1	AT1G15770	Bra026108	Bra026748	Bra016651	c0001_01227
fgenesh1_pm.C_scaffold_1001348	AT1G15800	Bra026101	Bra026747	-	c0001_01229
scaffold_101768.1	AT1G15810	Bra026100	Bra026746	-	c0001_01230
fgenesh2_kg.1__1735__AT1G15820.1	AT1G15820	Bra026099	Bra026745	Bra016650	c0001_01231
scaffold_101775.1	AT1G15870	Bra026096	-	-	c0001_01235
fgenesh2_kg.1__1741__AT1G15880.1	AT1G15880	Bra026095	Bra026741	Bra016648	c0001_01236
scaffold_101777.1	AT1G15890	Bra026094	-	-	c0001_01237
fgenesh2_kg.1__1743__AT1G15910.1	AT1G15910	-	Bra026740	-	c0001_01239
fgenesh1_pm.C_scaffold_1001362	AT1G15920	Bra026093	-	-	c0001_01240
fgenesh2_kg.1__1748__AT1G15950.1	AT1G15950	Bra026090	Bra026737	-	c0001_01242
scaffold_101783.1	AT1G15960	Bra026089	-	-	c0001_01243
fgenesh2_kg.1__1750__AT1G15970.1	AT1G15970	-	Bra026736	Bra016645	c0001_01244
fgenesh2_kg.1__1751__AT1G15980.1	AT1G15980	Bra026087	-	-	c0001_01245
fgenesh2_kg.1__1757__AT1G16020.1	AT1G16020	-	Bra026735	-	c0001_01247
fgenesh2_kg.1__1758__AT1G16030.1	AT1G16030	Bra026084	-	Bra016644	c0001_01249
Al_scaffold_0001_1667	AT1G16040	Bra026083	Bra026734	Bra016643	c0001_01250
fgenesh2_kg.1__1760__AT1G16060.1	AT1G16060	Bra026082	-	-	c0001_01251
fgenesh2_kg.1__1762__AT1G16070.1	AT1G16070	Bra026081	-	-	c0001_01252
fgenesh2_kg.1__1769__AT1G16170.1	AT1G16170	Bra026079	Bra026730	Bra016642	c0001_01255
fgenesh2_kg.1__1770__AT1G16180.1	AT1G16180	-	Bra026729	-	c0001_01256
fgenesh1_pm.C_scaffold_1001379	AT1G16190	Bra026076	Bra026728	-	c0001_01257
fgenesh1_pg.C_scaffold_1001466	AT1G16220	Bra026075	-	-	c0133_00016
fgenesh2_kg.1__1775__AT1G16240.3	AT1G16225	Bra026074	Bra026727	-	c0133_00015
scaffold_101809.1	AT1G16250	Bra026073	-	Bra016641	c0001_01260
fgenesh2_kg.1__1778__AT1G16270.1	AT1G16270	Bra026049	Bra026726	-	c0001_01261
fgenesh2_kg.1__1779__AT1G16280.1	AT1G16280	Bra026071	Bra026725	-	c0133_00012
fgenesh1_pm.C_scaffold_1001386	AT1G16290	Bra026052	-	-	c0133_00011
fgenesh2_kg.1__1781__AT1G16300.1	AT1G16300	Bra026068	-	-	c0133_00010
fgenesh2_kg.1__1782__AT1G16310.1	AT1G16310	Bra026067	Bra026723	-	c0133_00009
fgenesh2_kg.1__1783__AT1G16320.1	AT1G16320	Bra026066	-	-	c0133_00008
fgenesh1_pm.C_scaffold_1001390	AT1G16330	Bra026065	-	Bra016640	c0133_00007
scaffold_101819.1	AT1G16350	Bra026064	-	-	c0133_00005
fgenesh2_kg.1__1787__AT1G16370.1	AT1G16370	Bra026062	-	Bra016638	c0133_00004
fgenesh1_pm.C_scaffold_1001395	AT1G16380	Bra026059	-	Bra016639	c0133_00003
fgenesh1_pm.C_scaffold_1001397	AT1G16400	Bra026058	-	-	c0133_00002
fgenesh1_pm.C_scaffold_1001400	AT1G16430	Bra026057	-	-	c0001_01272
fgenesh2_kg.1__1794__AT1G16440.1	AT1G16440	Bra026056	-	-	c0115_00019
fgenesh2_kg.1__1795__AT1G16445.1	AT1G16445	-	Bra026721	-	c0115_00018
fgenesh2_kg.1__1797__AT1G16460.1	AT1G16460	Bra026055	-	-	c0001_01274
scaffold_101833.1	AT1G16480	-	-	Bra016637	c0115_00014
fgenesh1_pg.C_scaffold_1001492	AT1G16490	Bra026048	Bra026720	-	c0001_01277
fgenesh2_kg.1__1802__AT1G16500.1	AT1G16500	Bra026046	Bra026718	-	c0001_01278
fgenesh2_kg.1__1803__AT1G16510.1	AT1G16510	Bra026044	Bra026717	-	c0001_01280
fgenesh2_kg.1__1804__AT1G16520.1	AT1G16520	Bra026043	-	-	c0001_01281
Al_scaffold_0001_1711	AT1G16530	Bra026042	Bra026716	-	c0001_01282
fgenesh2_kg.1__1806__AT1G16540.1	AT1G16540	Bra026041	-	-	c0001_01283
fgenesh2_kg.1__1809__AT1G16560.3	AT1G16560	Bra026040	Bra026715	-	c0115_00006
Al_scaffold_0001_1715	AT1G16570	Bra026039	Bra026714	-	c0001_01284
scaffold_101845.1	AT1G16590	-	Bra026713	-	c0001_01285
fgenesh2_kg.1__1815__AT1G16610.2	AT1G16610	Bra026037	Bra026712	-	c0115_00003
fgenesh2_kg.1__1816__AT1G16630.1	AT1G16630	Bra026035	-	-	c0001_01288
scaffold_101852.1	AT1G16650	Bra026033	-	-	c0001_01290
fgenesh2_kg.1__1817__AT1G16670.1	AT1G16670	Bra026032	Bra026710	-	c0001_01291
fgenesh1_pm.C_scaffold_1001423	AT1G16705	Bra026030	Bra026708	Bra016634	c0001_01295
fgenesh2_kg.1__1822__AT1G16720.1	AT1G16720	Bra026029	-	-	c0001_01296
fgenesh1_pg.C_scaffold_1001511	AT1G16730	-	-	Bra016633	c0001_01297
Al_scaffold_0001_1732	AT1G16740	Bra026028	-	-	c0001_01298
fgenesh2_kg.1__1825__AT1G16750.1	AT1G16750	-	-	Bra016632	c0001_01299
fgenesh1_pm.C_scaffold_1001433	AT1G16800	-	Bra026706	-	c0001_01302
Al_scaffold_0001_1740	AT1G16830	Bra026024	-	-	c0572_00003
fgenesh2_kg.1__1834__AT1G16840.1	AT1G16840	Bra026023	Bra026702	-	c0001_01305
fgenesh1_pg.C_scaffold_1001521	AT1G16850	Bra026022	Bra026701	-	c0001_01306
scaffold_101873.1	AT1G16860	Bra026021	-	Bra016629	c0001_01307
fgenesh2_kg.1__1841__AT1G16870.1	AT1G16870	Bra026020	-	Bra016628	c0001_01308
fgenesh2_kg.1__1842__AT1G16880.1	AT1G16880	Bra026019	-	Bra016627	c0001_01309
scaffold_101876.1	AT1G16890	Bra026018	Bra026700	Bra016626	c0001_01310
fgenesh2_kg.1__1846__AT1G16900.1	AT1G16900	Bra026017	-	Bra016625	c0001_01311
fgenesh2_kg.1__1848__AT1G16920.1	AT1G16920	Bra026016	Bra026698	Bra016624	c0001_01312
scaffold_101881.1	AT1G16930	Bra026015	Bra026697	-	c0001_01313
scaffold_101882.1	AT1G16950	Bra026013	Bra026696	Bra016623	c0001_01315
Al_scaffold_0001_1753	AT1G16960	-	-	Bra016622	c0001_01316
fgenesh2_kg.1__1852__AT1G16970.1	AT1G16970	Bra026012	-	-	c0001_01317
Al_scaffold_0001_1756	AT1G17010	Bra026008	Bra026693	-	c0001_01319
fgenesh2_kg.1__1858__AT1G17060.1	AT1G17060	Bra026005	Bra026692	Bra016621	c0001_01323
fgenesh2_kg.1__1859__AT1G17070.1	AT1G17070	-	Bra026691	-	c0001_01324
scaffold_101897.1	AT1G17090	-	Bra026689	Bra016619	c0001_01326
fgenesh2_kg.1__1862__AT1G17100.1	AT1G17100	Bra026004	-	-	c0001_01327
scaffold_101900.1	AT1G17110	Bra026003	-	Bra016618	c0001_01328
fgenesh2_kg.1__1869__AT1G17145.1	AT1G17145	Bra025999	-	-	c0001_01331
fgenesh2_kg.1__1871__AT1G17150.1	AT1G17150	Bra025997	-	-	c0001_01332
fgenesh1_pm.C_scaffold_1001463	AT1G17160	Bra025996	Bra026685	-	c0001_01333
fgenesh2_kg.1__1874__AT1G17170.1	AT1G17170	Bra025995	Bra026684	Bra016615	c0001_01334
fgenesh2_kg.1__1877__AT1G17200.1	AT1G17200	Bra025991	Bra026678	Bra016614	c0001_01337
fgenesh2_kg.1__1878__AT1G17210.1	AT1G17210	Bra025990	-	Bra016613	c0001_01338
fgenesh2_kg.1__1879__AT1G17220.1	AT1G17220	Bra025989	-	Bra016612	c0001_01339
scaffold_101915.1	AT1G17230	Bra025988	-	-	c0001_01340
fgenesh2_kg.1__1887__AT1G17285.1	AT1G17285	Bra025985	Bra026676	-	c0001_01344
scaffold_101927.1	AT1G17290	Bra025984	Bra026675	Bra016607	c0001_01345
fgenesh2_kg.1__1889__AT1G17310.1	AT1G17310	-	Bra026674	-	c0001_01346
fgenesh2_kg.1__1891__AT1G17340.1	AT1G17340	Bra025982	Bra026673	-	c0001_01347
fgenesh2_kg.1__1892__AT1G17345.1	AT1G17345	Bra025981	-	Bra016606	c0001_01349
fgenesh2_kg.1__1893__AT1G17350.1	AT1G17350	Bra025980	-	-	c0001_01350
scaffold_101937.1	AT1G17370	-	Bra030985	-	c0001_01352
fgenesh1_pm.C_scaffold_1001486	AT1G17380	Bra025977	Bra030986	Bra016604	c0001_01353
fgenesh2_kg.1__1899__AT1G17400.1	AT1G17400	Bra025976	-	Bra016603	c0001_01354
fgenesh2_kg.1__1901__AT1G17420.1	AT1G17420	-	Bra030988	Bra016602	c0001_01356
fgenesh2_kg.1__1902__AT1G17430.1	AT1G17430	-	-	Bra016601	c0001_01357
fgenesh2_kg.1__1903__AT1G17440.1	AT1G17440	Bra025975	Bra030989	-	c0001_01358
fgenesh2_kg.1__1907__AT1G17460.1	AT1G17460	Bra025973	-	-	c0001_01359
fgenesh2_kg.1__1908__AT1G17470.1	AT1G17470	Bra025972	-	Bra016599	c0001_01360
fgenesh2_kg.1__1910__AT1G17480.1	AT1G17480	Bra025971	-	-	c0001_01361
scaffold_101949.1	AT1G17490	Bra025969	-	-	c0001_01362
scaffold_101950.1	AT1G17500	-	Bra030991	-	c0001_01363
fgenesh2_kg.1__1912__AT1G17510.1	AT1G17510	Bra025968	-	-	c0001_01364
scaffold_101953.1	AT1G17520	Bra025967	Bra030992	Bra016598	c0001_01365
fgenesh2_kg.1__1914__AT1G17530.1	AT1G17530	Bra025966	-	Bra016597	c0001_01366
fgenesh2_kg.1__1915__AT1G17540.1	AT1G17540	Bra025965	-	Bra016596	c0001_01367
Al_scaffold_0001_1819	AT1G17545	Bra025964	Bra026703	Bra016595	c0001_01368
Al_scaffold_0001_1821	AT1G17560	Bra025963	-	-	c0001_01369
scaffold_101959.1	AT1G17580	-	Bra030993	-	c0001_01370
fgenesh2_kg.1__1922__AT1G17590.3	AT1G17590	-	Bra030996	-	c0001_01371
fgenesh2_kg.1__1926__AT1G17620.1	AT1G17620	Bra025961	-	Bra016593	c0001_01372
fgenesh1_pg.C_scaffold_1001594	AT1G17630	Bra025960	-	-	c0001_01373
fgenesh2_kg.1__1931__AT1G17680.1	AT1G17680	Bra025955	-	-	c0001_01376
scaffold_101974.1	AT1G17700	Bra025954	Bra031001	-	c0001_01377
scaffold_101975.1	AT1G17710	Bra025953	Bra031002	Bra016591	c0001_01378
fgenesh2_kg.1__1938__AT1G17720.1	AT1G17720	Bra025952	Bra031003	Bra016590	c0001_01379
fgenesh2_kg.1__1940__AT1G17745.1	AT1G17745	-	-	Bra016589	c0001_01380
fgenesh2_kg.1__1941__AT1G17750.1	AT1G17750	Bra025673	-	-	c0001_01381
fgenesh2_kg.1__1942__AT1G17760.1	AT1G17760	-	-	Bra016588	c0001_01382
fgenesh1_pm.C_scaffold_1001524	AT1G17790	Bra025948	Bra031004	Bra016586	c0001_01384
scaffold_101985.1	AT1G17810	Bra025947	Bra031005	-	c0001_01386
scaffold_101986.1	AT1G17820	Bra025946	Bra031006	-	c0001_01387
fgenesh2_kg.1__1951__AT1G17840.1	AT1G17840	Bra025944	-	Bra016584	c0001_01388
Al_scaffold_0001_1854	AT1G17850	Bra025943	-	-	c0001_01389
scaffold_101992.1	AT1G17860	Bra025942	-	Bra016580	c0001_01390
scaffold_101993.1	AT1G17870	Bra025941	-	-	c0001_01391
fgenesh1_pm.C_scaffold_1001532	AT1G17880	Bra025940	Bra031007	Bra016579	c0001_01392
fgenesh2_kg.1__1956__AT1G17890.1	AT1G17890	Bra025939	-	-	c0001_01393
scaffold_101999.1	AT1G17940	Bra025936	-	-	c0001_01396
scaffold_102001.1	AT1G17950	-	Bra031008	Bra016575	c0001_01397
fgenesh1_pm.C_scaffold_1001539	AT1G17970	-	-	Bra016574	c0001_01398
fgenesh2_kg.1__1966__AT1G17980.1	AT1G17980	-	Bra031010	Bra016573	c0001_01399
fgenesh2_kg.1__1968__AT1G18000.1	AT1G18000	-	Bra031011	-	c0001_01400
fgenesh1_pm.C_scaffold_1001543	AT1G18030	Bra025933	-	-	c0001_01401
fgenesh2_kg.1__1975__AT1G18040.1	AT1G18040	-	Bra031013	Bra016572	c0001_01402
fgenesh2_kg.1__1976__AT1G18070.1	AT1G18070	Bra025932	-	Bra016571	c0001_01403
scaffold_102015.1	AT1G18080	Bra025931	Bra031014	Bra016570	c0001_01405
scaffold_102016.1	AT1G18090	-	-	Bra016569	c0001_01406
scaffold_102017.1	AT1G18100	Bra025930	Bra031016	-	c0001_01407
scaffold_102020.1	AT1G18140	-	-	Bra016568	c0001_01408
Al_scaffold_0001_1881	AT1G18150	Bra025929	Bra031017	Bra016567	c0001_01409
fgenesh2_kg.1__1986__AT1G18160.1	AT1G18160	Bra025927	-	-	c0001_01410
scaffold_102025.1	AT1G18180	Bra025926	-	-	c0001_01411
scaffold_102028.1	AT1G18210	Bra025924	-	Bra016564	c0001_01413
scaffold_102031.1	AT1G18250	Bra025923	-	-	c0001_01414
scaffold_102032.1	AT1G18260	Bra025922	-	-	c0001_01415
fgenesh2_kg.1__1996__AT1G18265.1	AT1G18265	Bra025921	-	-	c0001_01416
fgenesh2_kg.1__1998__AT1G18270.2	AT1G18270	Bra025920	-	-	c0001_01417
Al_scaffold_0001_1894	AT1G18280	Bra025919	Bra031024	Bra016563	c0001_01418
fgenesh2_kg.1__2000__AT1G18290.1	AT1G18290	Bra025918	Bra031025	Bra016562	c0001_01419
fgenesh1_pm.C_scaffold_1001564	AT1G18300	Bra025917	-	Bra016561	c0001_01420
fgenesh2_kg.1__2002__AT3G10110.1	AT1G18320	-	Bra031026	Bra016560	c0001_01422
fgenesh2_kg.1__2008__AT1G18340.1	AT1G18340	Bra025913	-	-	c0001_01423
Al_scaffold_0001_1911	AT1G18420	Bra025906	-	-	c0001_01428
fgenesh2_kg.1__2016__AT1G18440.1	AT1G18440	Bra025905	-	-	c0001_01429
fgenesh2_kg.1__2020__AT1G18470.1	AT1G18470	Bra025904	Bra031030	Bra016557	c0001_01431
fgenesh2_kg.1__2023__AT1G18490.1	AT1G18490	Bra025900	-	-	c0001_01432
fgenesh2_kg.1__2024__AT1G18500.1	AT1G18500	Bra025899	Bra031031	-	c0001_01433
Al_scaffold_0001_1920	AT1G18510	Bra025898	-	-	c0001_01434
scaffold_102066.1	AT1G18520	Bra025897	Bra031032	Bra016556	c0001_01435
scaffold_102067.1	AT1G18530	Bra025896	Bra031033	-	c0001_01436
scaffold_102068.1	AT1G18540	Bra025895	Bra031034	Bra016555	c0001_01437
fgenesh1_pg.C_scaffold_1001676	AT1G18550	Bra025894	-	-	c0001_01438
fgenesh2_kg.1__2031__AT1G18570.1	AT1G18570	Bra025666	Bra031035	Bra016553	c0001_01440
fgenesh1_pm.C_scaffold_1001587	AT1G18580	Bra025667	Bra031036	Bra016552	c0001_01442
fgenesh2_kg.1__2033__AT1G18590.1	AT1G18590	Bra025668	-	-	c0001_01444
fgenesh2_kg.1__2034__AT1G18600.1	AT1G18600	Bra025671	-	-	c0001_01445
Al_scaffold_0001_1930	AT1G18610	Bra025672	-	Bra016550	c0001_01446
fgenesh2_kg.1__2037__AT1G18620.2	AT1G18620	-	Bra031037	-	c0001_01447
fgenesh2_kg.1__2042__AT1G18660.4	AT1G18660	Bra025676	Bra031038	-	c0001_01449
Al_scaffold_0001_1938	AT1G18680	-	Bra031039	-	c0001_01452
fgenesh1_pm.C_scaffold_1001597	AT1G18690	Bra025677	-	-	c0001_01453
fgenesh2_kg.1__2047__AT1G18700.1	AT1G18700	-	Bra031040	-	c0001_01454
fgenesh1_pg.C_scaffold_1001691	AT1G18710	Bra025678	Bra031041	Bra016546	c0001_01455
scaffold_102089.1	AT1G18720	-	Bra031044	Bra016545	c0001_01458
fgenesh2_kg.1__2052__AT1G18730.3	AT1G18730	Bra025682	Bra031047	-	c0001_01459
fgenesh2_kg.1__2054__AT1G18740.1	AT1G18740	Bra025683	Bra031048	-	c0001_01460
fgenesh2_kg.1__2055__AT1G18750.1	AT1G18750	Bra025685	Bra031049	Bra016544	c0001_01461
scaffold_102102.1	AT1G18800	Bra025687	-	Bra016541	c0001_01462
scaffold_102103.1	AT1G18810	-	-	Bra016540	c0001_01463
fgenesh2_kg.1__2060__AT1G18830.1	AT1G18830	-	-	Bra016539	c0001_01464
fgenesh2_kg.1__2061__AT1G18835.1	AT1G18835	Bra025688	Bra031051	Bra016538	c0001_01465
fgenesh1_pg.C_scaffold_1001707	AT1G18840	Bra025690	Bra031052	Bra016536	c0001_01466
fgenesh2_kg.1__2064__AT1G18850.1	AT1G18850	Bra025691	-	-	c0001_01467
fgenesh1_pg.C_scaffold_1001709	AT1G18860	Bra025692	Bra031053	Bra016535	c0001_01468
scaffold_102112.1	AT1G18870	Bra025694	-	-	c0001_01469
fgenesh2_kg.1__2066__AT1G18880.1	AT1G18880	Bra025695	Bra031054	Bra016534	c0001_01470
scaffold_102114.1	AT1G18890	Bra025696	Bra031055	-	c0001_01471
scaffold_102115.1	AT1G18900	Bra025697	-	Bra016533	c0001_01472
fgenesh2_kg.1__2070__AT1G18910.1	AT1G18910	Bra025698	Bra031056	-	c0001_01473
fgenesh1_pm.C_scaffold_1001618	AT1G18940	Bra025702	-	-	c0001_01474
fgenesh2_kg.1__2072__AT1G18950.1	AT1G18950	Bra025703	Bra031057	Bra016532	c0001_01475
fgenesh2_kg.1__2073__AT1G18960.1	AT1G18960	-	-	Bra016531	c0001_01476
scaffold_102120.1	AT1G18970	Bra025704	Bra031058	-	c0001_01477
fgenesh2_kg.1__2076__AT1G18990.1	AT1G18990	Bra025705	Bra031059	-	c0001_01479
fgenesh2_kg.1__2077__AT1G19000.2	AT1G19000	-	Bra031060	Bra016530	c0001_01480
fgenesh1_pg.C_scaffold_1001721	AT1G19010	-	-	Bra016529	c0001_01481
scaffold_102125.1	AT1G19020	Bra025707	Bra031061	Bra016528	c0001_01482
fgenesh2_kg.1__2081__AT1G19025.1	AT1G19025	-	Bra031062	-	c0001_01483
scaffold_102129.1	AT1G19050	Bra025708	-	Bra016526	c0001_01484
fgenesh2_kg.1__2083__AT1G19090.1	AT1G19090	Bra025709	-	-	c0001_01485
fgenesh2_kg.1__2085__AT1G19110.1	AT1G19110	Bra025710	Bra031064	Bra016525	c0001_01486
fgenesh2_kg.1__2092__AT1G19140.2	AT1G19140	Bra025711	-	Bra016523	c0001_01489
fgenesh2_kg.1__2093__AT1G19150.1	AT1G19150	-	-	Bra016522	c0001_01490
fgenesh2_kg.1__2096__AT1G19180.2	AT1G19180	Bra025713	Bra031065	Bra016520	c0001_01491
Al_scaffold_0001_1991	AT1G19200	Bra025715	-	-	c0001_01493
fgenesh2_kg.1__2098__AT1G19210.1	AT1G19210	Bra025719	Bra031069	Bra016518	c0218_00005
fgenesh1_pg.C_scaffold_1001739	AT1G19220	Bra025720	-	Bra016517	c0001_01494
fgenesh1_pm.C_scaffold_1001641	AT1G19230	Bra025721	Bra031070	-	c0001_01495
fgenesh2_kg.1__2101__AT1G19240.1	AT1G19240	Bra025722	-	-	c0218_00002
fgenesh1_pm.C_scaffold_1001643	AT1G19250	Bra025723	Bra031073	Bra016515	c0218_00001
scaffold_102154.1	AT1G19290	-	-	Bra016513	c0001_01498
fgenesh2_kg.1__2106__AT1G19300.1	AT1G19300	Bra025726	-	Bra016512	c0001_01499
scaffold_102156.1	AT1G19310	Bra025727	-	-	c0001_01500
fgenesh2_kg.1__2108__AT1G19320.1	AT1G19320	Bra025728	Bra031074	Bra016510	c0001_01501
fgenesh2_kg.1__2109__AT1G19330.1	AT1G19330	Bra025729	Bra031076	Bra016509	c0001_01503
fgenesh2_kg.1__2111__AT1G19340.1	AT1G19340	Bra025732	-	-	c0001_01504
fgenesh2_kg.1__2112__AT1G19350.4	AT1G19350	Bra025733	Bra031077	Bra016508	c0001_01505
fgenesh2_kg.1__2117__AT1G19360.1	AT1G19360	Bra025734	-	Bra016507	c0001_01506
scaffold_102162.1	AT1G19370	Bra025735	-	-	c0001_01507
fgenesh2_kg.1__2119__AT1G19380.1	AT1G19380	-	-	Bra016506	c0001_01508
fgenesh2_kg.1__2121__AT1G19400.2	AT1G19400	-	Bra031080	-	c0001_01509
scaffold_102178.1	AT1G19430	Bra025737	-	-	c0001_01510
fgenesh2_kg.1__2127__AT1G19440.1	AT1G19440	Bra025738	Bra031081	-	c0001_01512
fgenesh2_kg.1__2128__AT1G19450.1	AT1G19450	Bra025740	Bra031082	-	c0001_01513
Al_scaffold_0001_2029	AT1G19485	Bra025742	-	Bra016505	c0077_00024
fgenesh1_pm.C_scaffold_1001664	AT1G19510	Bra025745	Bra012183	-	c0001_01517
fgenesh2_kg.1__2133__AT1G19520.1	AT1G19520	Bra025746	-	-	c0077_00022
scaffold_102187.1	AT1G19530	Bra025747	-	-	c0077_00021
fgenesh2_kg.1__2134__AT1G19540.1	AT1G19540	Bra025748	-	-	c0077_00020
fgenesh2_kg.1__2135__AT1G19570.1	AT1G19550	Bra025749	-	Bra016503	c0077_00019
fgenesh1_pm.C_scaffold_1001669	AT1G19580	Bra025750	-	Bra016502	c0077_00018
scaffold_102191.1	AT1G19600	Bra025751	-	-	c0077_00017
fgenesh2_kg.1__2140__AT1G19610.1	AT1G19610	-	-	Bra016501	c0077_00016
Al_scaffold_0001_2039	AT1G19620	Bra025752	-	Bra016500	c0077_00015
fgenesh2_kg.1__2141__AT1G19630.1	AT1G19630	-	-	Bra016499	c0077_00014
fgenesh2_kg.1__2142__AT1G19640.1	AT1G19640	Bra025753	Bra012184	Bra016498	c0077_00012
fgenesh2_kg.1__2143__AT1G19650.1	AT1G19650	Bra025754	Bra012186	-	c0077_00011
fgenesh2_kg.1__2146__AT1G19660.1	AT1G19660	Bra025755	-	-	c0077_00009
fgenesh2_kg.1__2147__AT1G19670.1	AT1G19670	Bra025756	-	-	c0077_00008
Al_scaffold_0001_2046	AT1G19690	Bra025757	-	-	c0077_00007
fgenesh2_kg.1__2150__AT1G19700.1	AT1G19700	Bra025758	-	Bra016497	c0077_00006
scaffold_102202.1	AT1G19710	Bra025759	-	-	c0001_01531
fgenesh2_kg.1__2152__AT1G19715.1	AT1G19715	Bra025760	-	Bra016496	c0077_00004
scaffold_102205.1	AT1G19730	Bra025762	-	-	c0001_01533
fgenesh2_kg.1__2155__AT1G19740.1	AT1G19740	Bra025763	-	-	c0001_01534
fgenesh2_kg.1__2156__AT1G19770.1	AT1G19770	Bra025764	-	Bra016495	c0001_01535
fgenesh2_kg.1__2159__AT1G19790.1	AT1G19790	Bra025768	-	-	c0001_01536
fgenesh2_kg.1__2160__AT1G19800.1	AT1G19800	Bra025769	-	-	c0001_01537
fgenesh2_kg.1__2161__AT1G19830.1	AT1G19830	Bra025770	-	-	c0001_01538
fgenesh1_pg.C_scaffold_1001798	AT1G19835	Bra025772	-	Bra016494	c0001_01539
scaffold_102218.1	AT1G19840	Bra025774	Bra012188	Bra016493	c0001_01540
fgenesh2_kg.1__2164__AT1G19850.1	AT1G19850	Bra025775	Bra012190	Bra016492	c0001_01541
fgenesh2_kg.1__2165__AT1G19860.1	AT1G19860	Bra025776	-	Bra016491	c0001_01542
fgenesh1_pm.C_scaffold_1001695	AT1G19870	Bra025777	-	Bra016490	c0001_01543
scaffold_102224.1	AT1G19880	Bra025778	Bra012191	-	c0001_01544
fgenesh2_kg.1__2169__AT1G19900.1	AT1G19900	Bra025780	Bra012194	Bra016489	c0001_01545
fgenesh2_kg.1__2170__AT1G19910.1	AT1G19910	Bra025781	Bra012197	Bra016488	c0001_01546
fgenesh2_kg.1__2172__AT1G19940.1	AT1G19940	Bra025783	Bra012198	-	c0001_01547
fgenesh1_pm.C_scaffold_1001702	AT1G19950	Bra025784	-	Bra016486	c0001_01548
fgenesh1_pm.C_scaffold_1001705	AT1G19970	Bra025786	Bra012200	Bra016483	c0001_01549
fgenesh1_pm.C_scaffold_1001706	AT1G19990	Bra025787	-	-	c0001_01551
fgenesh2_kg.1__2182__AT1G20020.3	AT1G20020	-	Bra012203	Bra016481	c0001_01552
fgenesh1_pg.C_scaffold_1001821	AT1G20060	-	Bra012205	-	c0001_01554
scaffold_102245.1	AT1G20070	Bra025790	Bra012207	Bra016479	c0001_01556
fgenesh1_pm.C_scaffold_1001716	AT1G20080	-	Bra012209	Bra016478	c0001_01557
fgenesh2_kg.1__2189__AT1G20090.1	AT1G20090	-	Bra012210	Bra016477	c0001_01558
fgenesh2_kg.1__2190__AT1G20100.1	AT1G20100	Bra025792	-	-	c0001_01559
fgenesh1_pm.C_scaffold_1001719	AT1G20120	Bra025794	Bra012212	Bra016475	c0001_01560
scaffold_102256.1	AT1G20140	Bra025795	Bra012214	-	c0001_01562
Al_scaffold_0001_2100	AT1G20150	Bra025796	Bra012217	-	c0001_01563
fgenesh2_kg.1__2201__AT1G20180.1	AT1G20180	Bra025799	-	Bra016474	c0001_01565
fgenesh2_kg.1__2203__AT1G20190.1	AT1G20190	Bra025800	Bra012218	Bra016473	c0001_01566
fgenesh2_kg.1__2204__AT1G20200.1	AT1G20200	-	Bra012219	-	c0001_01567
fgenesh1_pm.C_scaffold_1001726	AT1G20220	Bra025801	-	Bra016472	c0001_01568
scaffold_102264.1	AT1G20230	Bra025803	-	-	c0001_01570
fgenesh2_kg.1__2210__AT1G20260.2	AT1G20260	Bra025804	Bra012223	-	c0001_01571
fgenesh2_kg.1__2211__AT1G20270.1	AT1G20270	Bra025805	-	Bra016471	c0001_01572
fgenesh2_kg.1__2212__AT1G20300.1	AT1G20300	Bra025806	-	-	c0001_01573
fgenesh2_kg.1__2213__AT1G20310.1	AT1G20310	Bra025807	Bra012225	-	c0001_01574
fgenesh2_kg.1__2215__AT1G20330.1	AT1G20330	Bra025810	-	-	c0001_01575
fgenesh2_kg.1__2216__AT1G20340.1	AT1G20340	Bra025812	Bra012226	Bra016470	c0001_01576
scaffold_102281.1	AT1G20370	Bra025814	-	-	c0001_01581
fgenesh2_kg.1__2221__AT1G20380.1	AT1G20380	Bra025816	-	-	c0001_01582
scaffold_102284.1	AT1G20410	Bra025817	Bra012228	-	c0001_01583
fgenesh2_kg.1__2225__AT1G20430.1	AT1G20430	-	Bra012229	-	c0001_01585
scaffold_102289.1	AT1G20440	Bra025819	Bra012230	-	c0001_01586
scaffold_102291.1	AT1G20460	Bra025820	-	-	c0001_01587
fgenesh2_kg.1__2230__AT1G20470.1	AT1G20470	Bra025821	Bra012231	-	c0140_00009
fgenesh1_pm.C_scaffold_1001745	AT1G20480	Bra025822	Bra012233	Bra016463	c0001_01588
Al_scaffold_0001_2140	AT1G20520	-	-	Bra016462	c0001_01592
fgenesh1_pm.C_scaffold_1001748	AT1G20530	-	Bra012234	-	c0001_01593
fgenesh2_kg.1__2237__AT1G20540.1	AT1G20540	Bra025825	-	-	c0001_01594
fgenesh1_pm.C_scaffold_1001750	AT1G20550	Bra025826	-	-	c0001_01595
fgenesh2_kg.1__2240__AT1G20560.1	AT1G20560	Bra025827	-	-	c0001_01596
scaffold_102303.1	AT1G20575	Bra025828	Bra012235	-	c0001_01597
fgenesh1_pg.C_scaffold_1001871	AT1G20580	Bra025830	Bra012236	Bra016461	c0001_01598
fgenesh2_kg.1__2244__AT1G20610.1	AT1G20590	Bra025831	-	Bra016460	c0001_01599
fgenesh1_pm.C_scaffold_1001757	AT1G20620	Bra025832	Bra012239	Bra016459	c0001_01600
fgenesh2_kg.1__2251__AT1G20640.2	AT1G20640	Bra025834	Bra012241	Bra016458	c0001_01603
fgenesh2_kg.1__2253__AT1G20650.1	AT1G20650	Bra025835	-	Bra016457	c0001_01604
fgenesh2_kg.1__2254__AT1G20670.1	AT1G20670	Bra025837	Bra012243	Bra016456	c0001_01605
Al_scaffold_0001_2158	AT1G20680	Bra025813	-	-	c0001_01607
fgenesh1_pg.C_scaffold_1001881	AT1G20700	Bra025839	Bra012245	-	c0001_01609
fgenesh2_kg.1__2266__AT1G20760.1	AT1G20760	Bra025842	Bra012247	Bra016455	c0001_01612
fgenesh2_kg.1__2267__AT1G20770.1	AT1G20770	-	Bra012248	Bra016454	c0001_01613
scaffold_102325.1	AT1G20780	-	Bra012249	Bra016453	c0001_01614
Al_scaffold_0001_2172	AT1G20790	Bra025843	-	Bra016452	c0001_01615
fgenesh2_kg.1__2270__AT1G20810.1	AT1G20810	Bra025844	-	Bra016450	c0001_01616
fgenesh2_kg.1__2272__AT1G20823.1	AT1G20823	Bra025846	Bra012251	Bra016449	c0001_01617
fgenesh2_kg.1__2273__AT1G20830.1	AT1G20830	Bra025847	-	-	c0001_01618
fgenesh2_kg.1__2274__AT1G20840.1	AT1G20840	Bra025848	-	Bra016448	c0001_01619
fgenesh2_kg.1__2275__AT1G20850.1	AT1G20850	Bra025849	Bra012252	Bra016447	c0001_01620
fgenesh2_kg.1__2277__AT1G20870.1	AT1G20870	Bra025851	Bra012253	-	c0001_01621
fgenesh2_kg.1__2278__AT1G20880.1	AT1G20880	Bra025852	Bra012254	Bra016445	c0001_01622
Al_scaffold_0001_2183	AT1G20890	Bra025853	Bra012255	-	c0001_01623
fgenesh2_kg.1__2280__AT1G20900.1	AT1G20900	Bra025854	Bra012256	Bra016444	c0001_01624
fgenesh2_kg.1__2281__AT1G20910.1	AT1G20910	Bra025855	Bra012257	Bra016443	c0001_01625
fgenesh2_kg.1__2282__AT1G20920.2	AT1G20920	Bra025856	-	-	c0001_01626
fgenesh1_pm.C_scaffold_1001781	AT1G20925	Bra025857	-	-	c0001_01627
fgenesh2_kg.1__2285__AT1G20930.1	AT1G20930	-	Bra012258	-	c0001_01628
fgenesh2_kg.1__2287__AT1G20950.1	AT1G20950	Bra025858	-	Bra016442	c0001_01629
fgenesh2_kg.1__2288__AT1G20960.1	AT1G20960	-	Bra012260	-	c0001_01630
fgenesh2_kg.1__2291__AT1G20970.1	AT1G20970	Bra025862	-	-	c0001_01631
fgenesh2_kg.1__2292__AT1G20980.1	AT1G20980	Bra025863	-	-	c0001_01632
Al_scaffold_0001_2197	AT1G20990	Bra025864	Bra012261	-	c0001_01633
scaffold_102351.1	AT1G21000	Bra025865	Bra012263	Bra016441	c0001_01634
scaffold_102352.1	AT1G21010	Bra025866	Bra012264	Bra016439	c0001_01635
scaffold_102353.1	AT1G21050	Bra025868	Bra012266	Bra016437	c0001_01636
fgenesh2_kg.1__2297__AT1G21060.1	AT1G21060	Bra025869	-	-	c0001_01637
scaffold_102356.1	AT1G21070	Bra025871	-	Bra016435	c0001_01638
fgenesh2_kg.1__2300__AT1G21080.1	AT1G21080	Bra025872	-	Bra016434	c0001_01639
fgenesh1_pm.C_scaffold_1001795	AT1G21090	Bra025873	Bra012267	-	c0001_01640
fgenesh2_kg.1__2303__AT1G21110.1	AT1G21100	Bra025874	Bra012270	Bra016432	c0001_01641
scaffold_102364.1	AT1G21140	Bra025879	Bra012271	Bra016431	c0001_01643
fgenesh2_kg.1__2311__AT1G21190.1	AT1G21190	Bra025880	-	-	c0001_01646
fgenesh2_kg.1__2312__AT1G21200.1	AT1G21200	Bra025881	-	Bra016429	c0001_01647
Al_scaffold_0001_2216	AT1G21210	-	-	Bra016426	c0001_01648
fgenesh2_kg.1__2319__AT1G21320.1	AT1G21320	Bra025890	Bra012275	-	c0001_01651
scaffold_102386.1	AT1G21340	Bra017906	Bra012277	-	c0001_01653
fgenesh1_pm.C_scaffold_1001808	AT1G21350	Bra017907	-	-	c0001_01654
Al_scaffold_0001_2227	AT1G21360	Bra017908	Bra012278	-	c0001_01655
fgenesh2_kg.1__2326__AT1G21370.2	AT1G21370	Bra017909	-	-	c0001_01656
fgenesh2_kg.1__2328__AT1G21380.1	AT1G21380	Bra017910	Bra012279	Bra016425	c0001_01657
fgenesh2_kg.1__2329__AT1G21390.1	AT1G21390	Bra017911	-	-	c0001_01658
fgenesh1_pm.C_scaffold_1001813	AT1G21400	Bra017912	-	Bra016423	c0001_01659
fgenesh2_kg.1__2332__AT1G21410.1	AT1G21410	-	-	Bra016422	c0001_01660
fgenesh1_pm.C_scaffold_1001815	AT1G21430	Bra017913	-	-	c0001_01661
fgenesh2_kg.1__2334__AT1G21440.1	AT1G21440	Bra017914	-	-	c0001_01662
fgenesh2_kg.1__2335__AT1G21450.1	AT1G21450	Bra017915	Bra012280	-	c0001_01663
scaffold_102399.1	AT1G21460	Bra017916	-	Bra016421	c0001_01664
fgenesh2_kg.1__2337__AT1G21480.1	AT1G21480	Bra017918	-	Bra016420	c0001_01665
fgenesh2_kg.1__2340__AT1G21500.1	AT1G21500	Bra017920	Bra012282	-	c0001_01667
fgenesh2_kg.1__2341__AT1G21510.1	AT1G21510	Bra017921	-	-	c0001_01668
scaffold_102407.1	AT1G21520	Bra017923	Bra012283	Bra016417	c0001_01670
scaffold_102410.1	AT1G21530	Bra017925	-	-	c0001_01672
fgenesh2_kg.1__2345__AT1G21550.1	AT1G21550	Bra017927	-	-	c0001_01674
scaffold_102413.1	AT1G21560	Bra017928	-	-	c0001_01675
fgenesh2_kg.1__2349__AT1G21590.1	AT1G21590	Bra017931	-	Bra016415	c0001_01677
fgenesh2_kg.1__2350__AT1G21600.2	AT1G21600	Bra017932	-	Bra016414	c0001_01678
fgenesh2_kg.1__2354__AT1G21630.1	AT1G21630	Bra017933	Bra012288	Bra016413	c0001_01680
scaffold_102423.1	AT1G21640	Bra017934	-	-	c0001_01681
fgenesh1_pm.C_scaffold_1001836	AT1G21650	-	-	Bra016412	c0001_01682
fgenesh2_kg.1__2358__AT1G21660.1	AT1G21660	Bra017937	Bra012290	-	c0001_01684
fgenesh2_kg.1__2359__AT1G21670.1	AT1G21670	Bra017939	-	-	c0001_01685
fgenesh2_kg.1__2363__AT1G21695.1	AT1G21695	Bra017942	Bra012291	-	c0001_01688
fgenesh2_kg.1__2364__AT1G21700.1	AT1G21700	Bra017943	-	Bra016409	c0001_01689
Al_scaffold_0001_2266	AT1G21720	Bra017945	Bra012292	Bra016408	c0001_01690
fgenesh2_kg.1__2366__AT1G21730.1	AT1G21730	Bra017946	-	-	c0001_01691
fgenesh2_kg.1__2367__AT1G21740.1	AT1G21740	Bra017947	-	-	c0001_01692
scaffold_102441.1	AT1G21750	Bra017948	Bra012293	Bra016405	c0001_01693
scaffold_102442.1	AT1G21760	Bra017949	-	-	c0001_01694
Al_scaffold_0001_2273	AT1G21770	Bra017950	-	-	c0001_01695
scaffold_102444.1	AT1G21780	Bra017951	-	-	c0001_01696
fgenesh1_pm.C_scaffold_1001854	AT1G21830	Bra017953	Bra012294	Bra016404	c0001_01699
fgenesh2_kg.1__2374__AT1G21840.1	AT1G21840	-	Bra012296	-	c0001_01700
fgenesh1_pm.C_scaffold_1001859	AT1G21870	-	-	Bra016403	c0001_01702
fgenesh1_pm.C_scaffold_1001861	AT1G21890	-	Bra012297	-	c0001_01703
scaffold_102456.1	AT1G21900	Bra017957	-	Bra016401	c0001_01704
fgenesh2_kg.1__2381__AT1G21910.1	AT1G21910	Bra036022	Bra012298	Bra016400	c0001_01705
fgenesh2_kg.1__2382__AT1G21920.1	AT1G21920	Bra031352	Bra012299	Bra016399	c0001_01706
fgenesh2_kg.1__2383__AT1G21930.1	AT1G21930	Bra031353	Bra012300	-	c0001_01707
Al_scaffold_0001_2297	AT1G21940	Bra031354	-	-	c0001_01708
fgenesh2_kg.1__2386__AT1G21970.1	AT1G21970	Bra031356	Bra012301	Bra016397	c0001_01709
fgenesh2_kg.1__2387__AT1G21980.1	AT1G21980	-	-	Bra016396	c0001_01710
fgenesh2_kg.1__2389__AT1G22015.1	AT1G22015	Bra031357	Bra012302	Bra016393	c0001_01712
fgenesh2_kg.1__2390__AT1G22020.1	AT1G22020	Bra031358	-	Bra016392	c0001_01713
Al_scaffold_0001_2309	AT1G22030	Bra031359	-	Bra016391	c0001_01714
fgenesh2_kg.1__2392__AT1G22040.1	AT1G22040	Bra031360	Bra012304	-	c0001_01715
fgenesh2_kg.1__2393__AT1G22050.1	AT1G22050	Bra031361	Bra012305	-	c0001_01716
scaffold_102499.1	AT1G22060	Bra031362	-	Bra016390	c0001_01717
scaffold_102500.1	AT1G22065	Bra031363	-	-	c0001_01718
fgenesh2_kg.1__2395__AT1G22070.1	AT1G22070	Bra031364	-	Bra016389	c0001_01719
fgenesh1_pm.C_scaffold_1001880	AT1G22120	Bra031366	Bra012307	-	c0001_01722
Al_scaffold_0001_2320	AT1G22130	-	Bra012308	Bra016386	c0001_01723
fgenesh1_pm.C_scaffold_1001883	AT1G22150	Bra031368	-	-	c0001_01724
fgenesh2_kg.1__2403__AT1G22160.1	AT1G22160	Bra031369	Bra012309	-	c0001_01725
fgenesh2_kg.1__2404__AT1G22170.1	AT1G22170	-	Bra012310	-	c0001_01726
scaffold_102513.1	AT1G22180	Bra031370	Bra012311	-	c0001_01727
fgenesh2_kg.1__2408__AT1G22190.1	AT1G22190	Bra031371	-	-	c0001_01728
fgenesh2_kg.1__2410__AT1G22200.1	AT1G22200	Bra031372	Bra012312	-	c0001_01729
fgenesh2_kg.1__2412__AT1G22220.1	AT1G22220	Bra031373	Bra012314	Bra016384	c0001_01731
fgenesh2_kg.1__2413__AT1G22230.1	AT1G22230	Bra031374	Bra012315	-	c0001_01733
fgenesh1_pg.C_scaffold_1002032	AT1G22240	Bra031375	Bra012316	-	c0001_01734
fgenesh1_pg.C_scaffold_1002035	AT1G22250	Bra031377	Bra012317	-	c0001_01735
fgenesh2_kg.1__2417__AT1G22270.1	AT1G22270	Bra031378	Bra012318	-	c0001_01737
fgenesh2_kg.1__2421__AT1G22280.1	AT1G22280	Bra031382	Bra012319	Bra016383	c0001_01738
fgenesh1_pm.C_scaffold_1001897	AT1G22290	Bra031383	Bra012325	Bra016380	c0001_01739
fgenesh2_kg.1__2425__AT1G22310.2	AT1G22310	-	Bra012320	-	c0001_01740
fgenesh1_pm.C_scaffold_1001899	AT1G22330	Bra031385	Bra012321	-	c0001_01741
fgenesh1_pg.C_scaffold_1002043	AT1G22340	Bra031388	Bra012324	Bra016424	c0001_01743
fgenesh2_kg.1__2435__AT1G22410.1	AT1G22410	Bra031389	-	Bra016381	c0001_01751
scaffold_102539.1	AT1G22420	-	Bra012326	Bra016379	c0001_01753
fgenesh2_kg.1__2436__AT1G22430.1	AT1G22430	Bra031390	Bra012327	Bra016378	c0001_01754
scaffold_102547.1	AT1G22450	Bra031391	-	-	c0001_01756
fgenesh1_pm.C_scaffold_1001912	AT1G22470	Bra040858	-	-	c0001_01758
fgenesh2_kg.1__2442__AT1G22480.1	AT1G22480	Bra040857	-	-	c0001_01759
fgenesh1_pg.C_scaffold_1002057	AT1G22490	Bra040856	Bra012329	Bra016377	c0001_01760
fgenesh2_kg.1__2444__AT1G22500.1	AT1G22500	Bra040855	Bra012330	-	c0001_01761
scaffold_102556.1	AT1G22510	-	Bra012331	-	c0001_01765
fgenesh2_kg.1__2447__AT1G22530.1	AT1G22530	Bra040854	-	-	c0001_01767
fgenesh2_kg.1__2448__AT1G22540.1	AT1G22540	Bra024520	Bra012334	Bra016375	c0001_01769
fgenesh2_kg.1__2451__AT1G22590.1	AT1G22590	Bra024521	Bra012335	-	c0001_01772
fgenesh2_kg.1__2453__AT1G22600.1	AT1G22600	-	Bra012336	-	c0001_01773
scaffold_102565.1	AT1G22610	Bra024523	-	-	c0001_01774
fgenesh2_kg.1__2455__AT1G22620.1	AT1G22620	Bra024524	-	Bra016373	c0001_01775
fgenesh2_kg.1__2457__AT1G22640.1	AT1G22640	Bra024526	Bra012337	-	c0001_01777
fgenesh2_kg.1__2458__AT1G22650.1	AT1G22650	Bra024527	-	-	c0001_01778
fgenesh1_pg.C_scaffold_1002073	AT1G22660	Bra024528	Bra012338	-	c0001_01779
Al_scaffold_0001_2376	AT1G22670	Bra024529	-	-	c0001_01780
fgenesh2_kg.1__2466__AT1G22700.2	AT1G22700	Bra024531	Bra012339	-	c0001_01783
scaffold_102578.1	AT1G22730	Bra024534	Bra012343	-	c0001_01785
Al_scaffold_0001_2383	AT1G22740	-	-	Bra016372	c0001_01786
fgenesh2_kg.1__2473__AT1G22750.4	AT1G22750	Bra024535	-	-	c0001_01787
fgenesh1_pg.C_scaffold_1002079	AT1G22760	-	-	Bra016371	c0001_01788
scaffold_102586.1	AT1G22800	Bra024538	Bra012344	-	c0001_01792
scaffold_102587.1	AT1G22810	Bra024539	Bra012345	-	c0001_01793
fgenesh2_kg.1__2480__AT1G22830.1	AT1G22830	Bra024540	-	-	c0001_01794
scaffold_102589.1	AT1G22840	Bra024541	Bra012346	-	c0001_01795
fgenesh2_kg.1__2484__AT1G22850.1	AT1G22850	Bra024542	Bra012347	-	c0001_01796
fgenesh1_pg.C_scaffold_1002089	AT1G22882	Bra024545	-	-	c0001_01798
scaffold_102598.1	AT1G22910	Bra024547	Bra012350	-	c0001_01799
fgenesh2_kg.1__2495__AT1G22920.1	AT1G22920	Bra024548	Bra012351	-	c0001_01800
scaffold_102600.1	AT1G22930	Bra024549	-	-	c0001_01801
fgenesh2_kg.1__2499__AT1G22940.1	AT1G22940	Bra024550	-	-	c0001_01802
fgenesh1_pm.C_scaffold_1001953	AT1G22950	Bra024551	-	Bra016368	c0001_01803
fgenesh2_kg.1__2502__AT1G22970.1	AT1G22970	Bra024555	-	-	c0001_01805
fgenesh2_kg.1__2503__AT1G22985.1	AT1G22985	-	Bra012352	Bra016367	c0001_01806
fgenesh2_kg.1__2504__AT1G22990.1	AT1G22990	Bra024556	Bra012353	-	c0001_01807
scaffold_102608.1	AT1G23000	Bra024557	-	-	c0001_01808
fgenesh2_kg.1__2505__AT1G23010.1	AT1G23010	Bra024558	-	-	c0001_01809
fgenesh2_kg.1__2507__AT1G23030.1	AT1G23030	Bra024559	Bra012355	-	c0001_01810
fgenesh2_kg.1__2508__AT1G23040.1	AT1G23040	Bra024560	Bra012356	-	c0001_01811
fgenesh2_kg.1__2509__AT1G23050.1	AT1G23050	Bra024561	-	-	c0001_01812
fgenesh2_kg.1__2510__AT1G23060.1	AT1G23060	-	Bra012357	-	c0001_01813
fgenesh2_kg.1__2513__AT1G23080.1	AT1G23080	-	Bra012358	Bra016366	c0001_01814
fgenesh2_kg.1__2516__AT1G23090.1	AT1G23090	Bra024562	Bra012359	-	c0001_01815
fgenesh2_kg.1__2517__AT1G23100.1	AT1G23100	Bra024563	-	-	c0249_00009
fgenesh2_kg.1__2520__AT1G23110.3	AT1G23110	-	Bra012360	-	c0001_01817
fgenesh2_kg.1__2521__AT1G23120.1	AT1G23120	-	-	Bra016361	c0001_01818
fgenesh2_kg.1__2523__AT1G23140.1	AT1G23140	Bra024565	-	-	c0001_01821
scaffold_102635.1	AT1G23150	-	-	Bra016360	c0001_01822
fgenesh2_kg.1__2527__AT1G23160.1	AT1G23160	-	-	Bra016359	c0001_01823
fgenesh1_pm.C_scaffold_1001972	AT1G23180	-	-	Bra016358	c0001_01825
fgenesh2_kg.1__2530__AT1G23190.1	AT1G23190	Bra024568	-	Bra016357	c0001_01826
Al_scaffold_0001_2437	AT1G23200	Bra024569	-	-	c0001_01827
fgenesh2_kg.1__2532__AT1G23205.1	AT1G23205	Bra024570	Bra012366	-	c0001_01828
fgenesh1_pg.C_scaffold_1002128	AT1G23210	Bra024571	-	-	c0001_01829
fgenesh2_kg.1__2534__AT1G23220.1	AT1G23220	Bra024572	Bra012367	Bra016356	c0001_01830
fgenesh2_kg.1__2535__AT1G23230.1	AT1G23230	Bra024573	Bra012368	-	c0001_01831
fgenesh2_kg.1__2537__AT1G23240.1	AT1G23240	-	Bra012369	-	c0001_01832
fgenesh2_kg.1__2541__AT1G23290.1	AT1G23290	Bra024577	Bra012370	Bra016354	c0001_01833
fgenesh2_kg.1__2543__AT1G23310.1	AT1G23310	Bra024580	Bra012371	Bra016353	c0001_01834
fgenesh1_pg.C_scaffold_1002142	AT1G23320	Bra024585	-	-	c0001_01835
fgenesh2_kg.1__2546__AT1G23330.1	AT1G23330	Bra024588	-	Bra016352	c0001_01837
fgenesh2_kg.1__2547__AT1G23340.1	AT1G23340	Bra024589	-	Bra016351	c0001_01838
fgenesh2_kg.1__2549__AT1G23350.1	AT1G23350	Bra024590	Bra012372	Bra016350	c0001_01839
fgenesh2_kg.1__2552__AT1G23360.1	AT1G23360	-	-	Bra016349	c0001_01840
fgenesh2_kg.1__2555__AT1G23390.1	AT1G23390	Bra024596	-	-	c0001_01843
fgenesh1_pg.C_scaffold_1002150	AT1G23400	Bra024597	-	-	c0001_01844
fgenesh2_kg.1__2557__AT1G23410.1	AT1G23410	Bra024598	-	Bra016346	c0001_01845
fgenesh1_pg.C_scaffold_1002152	AT1G23420	Bra024599	Bra012373	-	c0001_01846
Al_scaffold_0001_2467	AT1G23440	Bra024600	Bra012374	-	c0001_01847
fgenesh1_pm.C_scaffold_1001995	AT1G23450	Bra024601	-	-	c0001_01848
fgenesh2_kg.1__2567__AT1G23510.1	AT1G23510	Bra024606	-	-	c0001_01851
fgenesh2_kg.1__2570__AT1G23530.1	AT1G23530	Bra024607	Bra012378	Bra016343	c0001_01854
fgenesh2_kg.1__2571__AT1G23540.1	AT1G23540	Bra024608	-	Bra016342	c0001_01855
Al_scaffold_0001_2476	AT1G23550	Bra024609	Bra012380	-	c0001_01856
scaffold_102698.1	AT1G23640	Bra024610	-	-	c0001_01858
fgenesh2_kg.1__2587__AT1G23710.1	AT1G23710	Bra024611	-	-	c0001_01865
Al_scaffold_0001_2487	AT1G23730	Bra024615	Bra012384	-	c0001_01867
fgenesh2_kg.1__2589__AT1G23740.1	AT1G23740	Bra024616	-	-	c0001_01868
Al_scaffold_0001_2489	AT1G23750	Bra024617	Bra012386	-	c0001_01869
fgenesh2_kg.1__2592__AT1G23770.1	AT1G23770	-	Bra012387	Bra016332	c0001_01870
fgenesh1_pm.C_scaffold_1002016	AT1G23790	Bra024618	-	Bra016331	c0001_01871
scaffold_102719.1	AT1G23820	Bra024620	Bra012389	Bra016329	c0001_01874
fgenesh2_kg.1__2598__AT1G23830.1	AT1G23830	Bra024621	Bra012390	-	c0001_01875
fgenesh2_kg.1__2600__AT1G23860.3	AT1G23860	Bra024624	-	-	c0001_01876
scaffold_102724.1	AT1G23870	-	-	Bra016328	c0001_01877
fgenesh2_kg.1__2603__AT1G23880.1	AT1G23880	Bra024626	-	-	c0001_01878
Al_scaffold_0001_2511	AT1G23965	-	-	Bra016326	c0001_01882
fgenesh2_kg.1__2615__AT1G23980.1	AT1G23980	Bra024628	-	Bra016327	c0001_01881
fgenesh1_pg.C_scaffold_1002201	AT1G24000	Bra024629	Bra012413	-	c0001_01883
fgenesh2_kg.1__2616__AT1G24020.1	AT1G24020	-	Bra012398	-	c0001_01890
fgenesh2_kg.1__2617__AT1G24030.2	AT1G24030	Bra024631	-	-	c0001_01891
scaffold_102740.1	AT1G24040	Bra024632	-	-	c0001_01892
Al_scaffold_0001_2517	AT1G24050	-	Bra012415	-	c0001_01893
fgenesh1_pm.C_scaffold_1002033	AT1G24070	-	Bra012416	-	c0001_01894
fgenesh1_pm.C_scaffold_1002034	AT1G24090	Bra024633	-	-	c0001_01895
scaffold_102749.1	AT1G24100	Bra024634	-	-	c0001_01898
scaffold_102750.1	AT1G24110	Bra024635	-	-	c0001_01899
fgenesh2_kg.1__2626__AT1G24120.1	AT1G24120	Bra024636	-	Bra016320	c0001_01900
scaffold_102753.1	AT1G24140	Bra024638	-	-	c0001_01902
fgenesh1_pm.C_scaffold_1002040	AT1G24150	Bra024640	-	-	c0001_01905
fgenesh2_kg.1__2631__AT1G24160.1	AT1G24160	Bra024641	-	Bra016318	c0001_01906
fgenesh2_kg.1__2632__AT1G24170.1	AT1G24170	Bra024642	-	-	c0001_01907
scaffold_102761.1	AT1G24180	Bra024643	-	-	c0001_01908
fgenesh2_kg.1__2877__AT1G24260.1	AT1G24260	Bra032814	Bra030032	Bra010955	c0001_02094
scaffold_103039.1	AT1G24280	-	Bra030031	Bra010958	c0001_02091
fgenesh2_kg.1__2871__AT1G24290.1	AT1G24290	-	Bra030030	-	c0001_02090
fgenesh2_kg.1__2868__AT1G24310.1	AT1G24310	-	-	Bra010959	c0001_02088
scaffold_103035.1	AT1G24320	-	Bra030029	-	c0001_02087
fgenesh2_kg.1__2866__AT1G24330.1	AT1G24330	-	Bra030028	Bra010960	c0001_02086
scaffold_103033.1	AT1G24340	-	Bra030027	-	c0001_02085
scaffold_103032.1	AT1G24350	Bra032809	Bra030026	Bra010961	c0001_02084
fgenesh2_kg.1__2863__AT1G24360.1	AT1G24360	Bra032808	Bra030025	Bra010962	c0001_02083
scaffold_103028.1	AT1G24400	Bra032807	Bra030024	-	c0001_02082
fgenesh2_kg.1__2861__AT1G24405.1	AT1G24405	Bra032806	-	-	c0001_02081
fgenesh2_kg.1__2859__AT1G24430.1	AT1G24420	Bra032805	-	-	c0001_02079
scaffold_103024.1	AT1G24440	Bra032804	Bra012512	Bra010963	c0001_02078
fgenesh2_kg.1__2856__AT1G24460.1	AT1G24460	Bra032802	-	Bra010964	c0001_02077
fgenesh2_kg.1__2855__AT1G24470.1	AT1G24470	Bra032801	Bra012511	-	c0001_02076
fgenesh2_kg.1__2854__AT1G24480.1	AT1G24480	-	Bra012510	-	c0001_02075
fgenesh2_kg.1__2850__AT1G24510.1	AT1G24510	Bra032797	Bra012506	Bra010965	c0001_02071
scaffold_103015.1	AT1G24520	Bra032796	Bra012505	Bra010966	c0001_02070
scaffold_103014.1	AT1G24530	Bra032795	Bra012504	Bra010967	c0001_02069
fgenesh2_kg.1__2847__AT1G24540.1	AT1G24540	Bra032794	-	-	c0001_02068
fgenesh2_kg.1__2846__AT1G24560.1	AT1G24560	-	-	Bra010968	c0001_02066
fgenesh1_pm.C_scaffold_1002204	AT1G24570	Bra032792	Bra012501	-	c0001_02065
fgenesh2_kg.1__2844__AT1G24575.1	AT1G24575	Bra032790	-	Bra010970	c0001_02063
scaffold_103005.1	AT1G24577	-	-	Bra010971	c0001_02062
scaffold_103007.1	AT1G24580	-	-	Bra010969	c0001_02064
scaffold_103004.1	AT1G24590	-	Bra012499	Bra010972	c0001_02061
scaffold_103003.1	AT1G24600	-	Bra012498	Bra010973	c0001_02060
fgenesh2_kg.1__2840__AT1G24610.1	AT1G24610	Bra032788	-	-	c0001_02059
fgenesh1_pg.C_scaffold_1002401	AT1G24620	Bra032785	Bra012497	Bra010974	c0001_02058
fgenesh2_kg.1__2838__AT1G24625.1	AT1G24625	-	Bra012496	Bra010975	c0001_02057
fgenesh1_pm.C_scaffold_1002196	AT1G24650	-	Bra012495	-	c0001_02056
fgenesh1_pm.C_scaffold_1002194	AT1G24735	-	Bra012494	Bra010977	c0001_02053
scaffold_102992.1	AT1G24764	Bra032784	Bra012493	Bra010978	c0001_02052
fgenesh2_kg.1__2812__AT1G25230.1	AT1G25230	-	Bra012492	-	c0001_02049
scaffold_102981.1	AT1G25240	Bra024772	Bra012491	-	c0001_02048
Al_scaffold_0001_2743	AT1G25250	Bra024771	-	Bra010981	c0001_02047
fgenesh2_kg.1__2794__AT1G25350.1	AT1G25350	Bra024759	-	-	c0001_02031
fgenesh2_kg.1__2793__AT1G25360.1	AT1G25360	-	-	Bra010992	c0001_02030
fgenesh2_kg.1__2790__AT1G25380.1	AT1G25380	Bra024756	-	Bra010989	c0001_02028
scaffold_102961.1	AT1G25390	Bra024755	Bra012480	-	c0001_02027
scaffold_102960.1	AT1G25400	-	Bra012479	-	c0001_02026
scaffold_102959.1	AT1G25420	-	Bra012478	-	c0001_02024
scaffold_102957.1	AT1G25422	Bra024753	Bra012477	-	c0001_02023
fgenesh1_pm.C_scaffold_1002166	AT1G25425	Bra024751	Bra012476	-	c0001_02022
fgenesh2_kg.1__2783__AT1G25440.1	AT1G25440	Bra024750	Bra012475	Bra010994	c0001_02021
fgenesh2_kg.1__2782__AT1G25450.1	AT1G25450	Bra024749	-	-	c0001_02020
fgenesh2_kg.1__2781__AT1G25460.1	AT1G25460	Bra024747	-	-	c0001_02019
fgenesh2_kg.1__2778__AT1G25470.1	AT1G25470	Bra024743	-	-	c0001_02018
Al_scaffold_0001_2714	AT1G25480	Bra024742	-	Bra010995	c0001_02017
fgenesh2_kg.1__2776__AT1G25490.1	AT1G25490	Bra024741	Bra012474	Bra010996	c0001_02016
fgenesh1_pm.C_scaffold_1002159	AT1G25500	-	-	Bra010997	c0001_02015
scaffold_102946.1	AT1G25510	-	Bra012473	Bra010998	c0001_02014
fgenesh1_pg.C_scaffold_1002360	AT1G25520	Bra024740	Bra012472	Bra010999	c0001_02013
fgenesh2_kg.1__2771__AT1G25530.1	AT1G25530	Bra024738	-	Bra011000	c0001_02012
fgenesh2_kg.1__2769__AT1G25540.1	AT1G25540	Bra024737	-	Bra011001	c0001_02011
Al_scaffold_0001_2706	AT1G25550	-	Bra012471	-	c0001_02010
scaffold_102941.1	AT1G25560	Bra024735	-	Bra011002	c0001_02009
Al_scaffold_0001_2701	AT1G25682	Bra024732	-	Bra011006	c0001_02005
fgenesh2_kg.1__2762__AT1G26090.1	AT1G26090	-	-	Bra011007	c0001_02004
fgenesh1_pm.C_scaffold_1002151	AT1G26100	-	-	Bra011008	c0308_00004
fgenesh2_kg.1__2760__AT1G26110.1	AT1G26110	-	Bra012470	Bra011009	c0001_02003
fgenesh2_kg.1__2759__AT1G26120.1	AT1G26120	Bra024729	-	Bra011010	c0001_02001
scaffold_102929.1	AT1G26130	-	Bra012469	-	c0001_02000
fgenesh1_pm.C_scaffold_1002145	AT1G26140	Bra024728	-	Bra011011	c0001_01999
scaffold_102923.1	AT1G26180	-	-	Bra011013	c0001_01997
fgenesh2_kg.1__2753__AT1G26190.1	AT1G26190	-	Bra012464	Bra011014	c0001_01996
scaffold_102921.1	AT1G26200	-	-	Bra011015	c0001_01995
fgenesh2_kg.1__2751__AT1G26210.1	AT1G26210	-	Bra012463	Bra011017	c0001_01994
fgenesh2_kg.1__2748__AT1G26218.1	AT1G26220	-	-	Bra011018	c0001_01993
scaffold_102917.1	AT1G26230	-	Bra012462	-	c0001_01992
fgenesh2_kg.1__2744__AT1G26270.1	AT1G26270	Bra024724	-	Bra011020	c0001_01989
scaffold_102909.1	AT1G26310	-	-	Bra011021	c0001_01987
fgenesh2_kg.1__2740__AT1G26320.1	AT1G26320	Bra024723	-	-	c0001_01986
fgenesh2_kg.1__2738__AT1G26340.1	AT1G26340	Bra024721	-	-	c0001_01985
Al_scaffold_0001_2669	AT1G26360	-	-	Bra011022	c0001_01983
fgenesh2_kg.1__2732__AT1G26420.1	AT1G26380	Bra024719	-	Bra016272	c0001_01980
fgenesh1_pm.C_scaffold_1002125	AT1G26440	Bra024716	-	-	c0001_01979
scaffold_102892.1	AT1G26450	-	Bra012458	-	c0001_01978
fgenesh2_kg.1__2725__AT1G26470.1	AT1G26470	Bra024714	Bra012456	-	c0001_01977
fgenesh1_pm.C_scaffold_1002121	AT1G26480	Bra024713	Bra012455	Bra016273	c0001_01976
scaffold_102887.1	AT1G26500	Bra024712	-	-	c0001_01975
fgenesh2_kg.1__2711__AT1G26520.1	AT1G26520	Bra024711	-	-	c0001_01974
fgenesh1_pg.C_scaffold_1002310	AT1G26550	Bra024710	-	Bra016275	c0001_01973
fgenesh2_kg.1__2707__AT1G26560.1	AT1G26560	Bra024709	-	Bra016276	c0001_01972
fgenesh2_kg.1__2706__AT1G26570.1	AT1G26570	Bra024708	-	-	c0001_01971
fgenesh2_kg.1__2702__AT1G26610.1	AT1G26590	Bra024706	Bra012452	Bra016278	c0001_01969
Al_scaffold_0001_2641	AT1G26620	Bra024703	Bra012449	Bra016281	c0001_01968
fgenesh2_kg.1__2699__AT1G26630.1	AT1G26630	Bra024702	-	Bra016282	c0001_01967
fgenesh2_kg.1__2698__AT1G26640.1	AT1G26640	Bra024701	-	-	c0001_01966
scaffold_102864.1	AT1G26680	Bra024697	Bra012445	-	c0001_01963
Al_scaffold_0001_2632	AT1G26690	Bra024694	-	Bra016283	c0001_01962
fgenesh2_kg.1__2690__AT1G26700.1	AT1G26700	Bra024693	-	-	c0001_01961
fgenesh2_kg.1__2686__AT1G26740.1	AT1G26740	Bra024690	Bra012444	-	c0001_01958
fgenesh2_kg.1__2685__AT1G26750.1	AT1G26750	Bra024689	Bra012443	-	c0001_01957
fgenesh2_kg.1__2682__AT1G26770.2	AT1G26770	Bra024686	-	-	c0001_01955
fgenesh1_pg.C_scaffold_1002287	AT1G26780	Bra024685	-	Bra016285	c0001_01954
fgenesh1_pm.C_scaffold_1002091	AT1G26790	Bra024683	-	Bra016286	c0001_01953
fgenesh1_pm.C_scaffold_1002090	AT1G26795	-	-	Bra016288	c0001_01952
fgenesh2_kg.1__2674__AT1G26800.1	AT1G26800	Bra024682	Bra012441	Bra016290	c0315_00005
fgenesh2_kg.1__2673__AT1G26810.1	AT1G26810	-	Bra012440	-	c0001_01951
fgenesh2_kg.1__2672__AT1G26820.1	AT1G26820	-	Bra012439	-	c0001_01950
fgenesh2_kg.1__2664__AT1G26830.1	AT1G26830	Bra024680	-	Bra016291	c0001_01949
fgenesh2_kg.1__2665__AT1G26840.1	AT1G26840	Bra024679	-	Bra016292	c0001_01948
fgenesh2_kg.1__2668__AT1G26850.2	AT1G26850	Bra024678	Bra012437	Bra016293	c0001_01946
fgenesh1_pg.C_scaffold_1002274	AT1G26870	Bra024677	-	Bra016294	c0001_01944
fgenesh2_kg.1__2670__AT1G26880.1	AT1G26880	-	-	Bra016295	c0277_00007
fgenesh2_kg.1__2661__AT1G26920.1	AT1G26920	Bra024675	-	Bra016296	c0001_01941
fgenesh2_kg.1__2660__AT1G26930.1	AT1G26930	-	-	Bra016297	c0001_01940
fgenesh2_kg.1__2659__AT1G26940.1	AT1G26940	Bra024674	-	Bra016298	c0001_01939
fgenesh2_kg.1__2658__AT1G26945.1	AT1G26945	Bra024672	Bra012435	Bra016299	c0001_01938
fgenesh2_kg.1__2657__AT1G26960.1	AT1G26960	-	-	Bra016300	c0001_01937
fgenesh2_kg.1__2656__AT1G26970.1	AT1G26970	Bra024725	-	Bra016301	c0001_01935
scaffold_102812.1	AT1G27000	Bra024667	-	Bra016302	c0151_00001
scaffold_102807.1	AT1G27020	Bra024666	Bra012433	Bra016303	c0001_01932
Al_scaffold_0001_2574	AT1G27040	-	Bra012431	Bra011003	c0001_01930
Al_scaffold_0001_2573	AT1G27050	Bra024665	Bra012430	-	c0001_01929
scaffold_102803.1	AT1G27060	Bra024664	-	Bra016304	c0001_01927
scaffold_102802.1	AT1G27070	Bra024663	-	-	c0001_01926
fgenesh2_kg.1__2647__AT1G27090.1	AT1G27090	-	Bra012428	Bra016305	c0001_01924
fgenesh2_kg.1__2646__AT1G27100.1	AT1G27100	Bra024662	Bra012427	Bra016306	c0001_01923
scaffold_102798.1	AT1G27110	-	Bra012421	Bra016307	c0001_01922
fgenesh2_kg.1__2645__AT1G27120.1	AT1G27120	Bra024660	Bra012423	Bra016308	c0001_01920
fgenesh2_kg.1__2644__AT1G27130.1	AT1G27130	Bra024659	Bra012409	-	c0001_01919
fgenesh2_kg.1__2642__AT1G27150.1	AT1G27150	Bra024658	Bra012411	-	c0001_01917
Al_scaffold_0001_2559	AT1G27170	Bra024652	-	Bra016312	c0001_01914
scaffold_102786.1	AT1G27190	Bra024650	-	-	c0001_01913
scaffold_102785.1	AT1G27200	Bra024649	-	Bra016315	c0001_01912
scaffold_102784.1	AT1G27210	Bra024646	-	Bra016316	c0001_01911
Al_scaffold_0001_2553	AT1G27220	-	Bra012419	-	c0001_01910
fgenesh2_kg.1__2880__AT1G27300.1	AT1G27300	Bra032817	Bra030034	-	c0001_02096
scaffold_103046.1	AT1G27310	Bra032818	Bra030035	Bra010953	c0001_02097
fgenesh2_kg.1__2882__AT1G27320.1	AT1G27320	-	Bra030037	-	c0001_02098
scaffold_103049.1	AT1G27340	Bra032820	Bra030038	-	c0001_02099
scaffold_103051.1	AT1G27360	Bra032823	Bra030041	Bra010949	c0001_02100
fgenesh2_kg.1__2896__AT1G27385.1	AT1G27385	Bra032825	Bra030043	-	c0001_02102
scaffold_103056.1	AT1G27390	Bra032826	Bra030044	Bra010946	c0001_02103
fgenesh2_kg.1__2897__AT1G27400.1	AT1G27400	Bra032828	-	Bra010943	c0001_02105
scaffold_103059.1	AT1G27420	-	Bra030046	Bra010942	c0001_02106
fgenesh2_kg.1__2900__AT1G27430.1	AT1G27430	-	-	Bra010950	c0001_02107
scaffold_103061.1	AT1G27435	-	Bra030050	Bra010941	c0001_02108
fgenesh2_kg.1__2902__AT1G27440.1	AT1G27440	-	Bra030051	Bra010940	c0001_02109
fgenesh1_pm.C_scaffold_1002251	AT1G27470	Bra032831	-	Bra010934	c0001_02112
scaffold_103067.1	AT1G27480	-	Bra030052	-	c0001_02113
fgenesh2_kg.1__2909__AT1G27500.1	AT1G27500	Bra032832	-	-	c0001_02114
Al_scaffold_0001_2825	AT1G27510	-	-	Bra010933	c0001_02115
fgenesh2_kg.1__2911__AT1G27520.1	AT1G27520	Bra032833	-	-	c0001_02116
fgenesh2_kg.1__2912__AT1G27530.1	AT1G27530	-	Bra030054	Bra010932	c0001_02117
scaffold_103091.1	AT1G27600	Bra032835	Bra030055	Bra010929	c0001_02119
scaffold_103093.1	AT1G27620	Bra032837	-	Bra010928	c0001_02120
fgenesh2_kg.1__2922__AT1G27630.1	AT1G27630	-	Bra030056	Bra010927	c0001_02121
fgenesh2_kg.1__2923__AT1G27650.1	AT1G27650	-	Bra030057	Bra010926	c0001_02122
fgenesh2_kg.1__2924__AT1G27660.1	AT1G27660	-	-	Bra010925	c0001_02123
scaffold_103097.1	AT1G27670	Bra032840	-	-	c0001_02124
fgenesh2_kg.1__2926__AT1G27680.1	AT1G27680	Bra032842	-	-	c0001_02125
fgenesh2_kg.1__2927__AT1G27690.1	AT1G27690	-	-	Bra010924	c0001_02127
fgenesh2_kg.1__2930__AT1G27700.1	AT1G27700	-	Bra030059	Bra010923	c0001_02129
fgenesh1_pg.C_scaffold_1002478	AT1G27710	Bra032844	Bra030060	-	c0001_02130
fgenesh2_kg.1__2931__AT1G27720.1	AT1G27720	-	Bra030061	-	c0001_02131
fgenesh2_kg.1__2932__AT1G27730.1	AT1G27730	Bra032845	-	Bra010922	c0001_02132
fgenesh2_kg.1__2933__AT1G27740.1	AT1G27740	Bra032846	Bra030063	Bra010921	c0001_02133
fgenesh2_kg.1__2941__AT1G27770.1	AT1G27770	-	-	Bra010917	c0001_02135
fgenesh2_kg.1__2942__AT1G19750.1	AT1G27840	Bra032850	-	-	c0001_02137
fgenesh2_kg.1__2944__AT1G27880.1	AT1G27880	-	Bra030065	-	c0001_02139
scaffold_103118.1	AT1G27910	Bra032852	-	Bra010914	c0001_02141
fgenesh2_kg.1__2947__AT1G27920.1	AT1G27920	Bra032853	-	-	c0001_02142
scaffold_103120.1	AT1G27930	Bra032854	Bra030066	-	c0001_02143
scaffold_103122.1	AT1G27950	Bra032857	Bra030067	Bra010912	c0001_02145
fgenesh2_kg.1__2951__AT1G27960.1	AT1G27960	-	-	Bra010911	c0001_02146
fgenesh2_kg.1__2955__AT1G27990.1	AT1G27990	Bra032861	-	-	c0001_02148
fgenesh2_kg.1__2956__AT1G28010.1	AT1G28010	Bra032864	-	-	c0001_02149
fgenesh2_kg.1__2959__AT1G28050.1	AT1G28050	-	Bra030070	Bra010908	c0001_02152
fgenesh2_kg.1__2960__AT1G28060.1	AT1G28060	Bra032868	-	Bra010907	c0001_02153
fgenesh2_kg.1__2961__AT1G28070.1	AT1G28070	Bra032869	Bra030071	Bra010906	c0001_02154
fgenesh1_pm.C_scaffold_1002292	AT1G28080	Bra032870	-	Bra010904	c0001_02155
fgenesh2_kg.1__2964__AT1G28090.1	AT1G28090	Bra032873	-	-	c0001_02156
fgenesh2_kg.1__2971__AT1G28110.2	AT1G28110	Bra032875	-	Bra010903	c0001_02159
fgenesh2_kg.1__2973__AT1G28120.1	AT1G28120	-	Bra030073	Bra010902	c0001_02160
fgenesh2_kg.1__2974__AT1G28130.1	AT1G28130	Bra032876	Bra030074	-	c0001_02161
fgenesh2_kg.1__2976__AT1G28140.1	AT1G28140	Bra032878	-	-	c0001_02162
fgenesh2_kg.1__2977__AT1G28150.1	AT1G28150	Bra032879	Bra030075	-	c0001_02163
fgenesh2_kg.1__2978__AT1G28160.1	AT1G28160	Bra032881	Bra030076	Bra010901	c0001_02164
scaffold_103146.1	AT1G28170	-	-	Bra010899	c0001_02165
scaffold_103149.1	AT1G28190	Bra032882	-	Bra010898	c0001_02167
scaffold_103150.1	AT1G28200	-	-	Bra010897	c0001_02168
fgenesh2_kg.1__2983__AT1G28210.2	AT1G28210	-	-	Bra010892	c0001_02169
fgenesh1_pg.C_scaffold_1002524	AT1G28220	-	Bra030078	Bra010890	c0001_02170
fgenesh2_kg.1__2986__AT1G28240.1	AT1G28240	Bra032885	Bra030079	Bra010889	c0001_02173
scaffold_103156.1	AT1G28250	Bra032886	-	Bra010888	c0001_02174
fgenesh2_kg.1__2989__AT1G28260.2	AT1G28260	Bra032887	-	Bra010887	c0001_02175
fgenesh2_kg.1__2990__AT1G28270.1	AT1G28270	Bra032888	Bra030081	Bra010886	c0001_02176
scaffold_103160.1	AT1G28280	-	Bra030082	Bra010885	c0001_02177
fgenesh2_kg.1__2992__AT1G28290.2	AT1G28290	Bra032889	-	-	c0001_02178
fgenesh2_kg.1__2994__AT1G28300.1	AT1G28300	Bra032890	Bra030087	-	c0001_02181
fgenesh2_kg.1__2996__AT1G28310.2	AT1G28310	Bra032891	Bra030089	Bra010884	c0001_02182
fgenesh2_kg.1__2998__AT1G28320.1	AT1G28320	Bra032893	-	-	c0001_02183
fgenesh2_kg.1__3000__AT1G28330.1	AT1G28330	Bra032894	-	-	c0001_02186
scaffold_103169.1	AT1G28350	-	Bra030092	Bra010883	c0001_02188
fgenesh2_kg.1__3004__AT1G28360.1	AT1G28360	Bra032901	Bra030095	Bra010880	c0001_02189
fgenesh2_kg.1__3007__AT1G28380.1	AT1G28380	Bra032902	-	Bra010879	c0001_02193
scaffold_103175.1	AT1G28390	-	-	Bra010878	c0001_02195
fgenesh1_pm.C_scaffold_1002323	AT1G28395	Bra032905	-	Bra010877	c0001_02196
fgenesh2_kg.1__3013__AT1G28400.1	AT1G28400	Bra032906	-	Bra010876	c0001_02197
fgenesh2_kg.1__3014__AT1G28410.1	AT1G28410	Bra032907	-	-	c0001_02198
fgenesh2_kg.1__3015__AT1G28420.1	AT1G28420	Bra032908	Bra030097	Bra010869	c0120_00007
fgenesh2_kg.1__3017__AT1G28440.1	AT1G28440	Bra032909	Bra030098	Bra010867	c0120_00006
scaffold_103183.1	AT1G28470	Bra032910	Bra030099	-	c0120_00005
fgenesh2_kg.1__3019__AT1G28480.1	AT1G28480	Bra032911	Bra030102	-	c0120_00003
fgenesh2_kg.1__3020__AT1G28490.1	AT1G28490	Bra032912	-	Bra010866	c0120_00002
scaffold_103187.1	AT1G28510	-	Bra030103	Bra010865	c0120_00001
fgenesh2_kg.1__3026__AT1G28520.2	AT1G28520	Bra032913	-	Bra010864	c0001_02206
fgenesh2_kg.1__3028__AT1G28530.1	AT1G28530	-	-	Bra010863	c0001_02207
fgenesh2_kg.1__3029__AT1G28540.1	AT1G28540	-	Bra030104	Bra010861	c0001_02208
Al_scaffold_0001_2941	AT1G28550	Bra032914	Bra030105	Bra010860	c0001_02209
Al_scaffold_0001_2942	AT1G28560	-	-	Bra010859	c0001_02210
fgenesh2_kg.1__3032__AT1G28580.1	AT1G28570	Bra032917	Bra030108	-	c0001_02211
fgenesh2_kg.1__3048__AT1G28680.1	AT1G28680	Bra032918	-	-	c0001_02218
scaffold_103205.1	AT1G28690	-	-	Bra010856	c0001_02219
fgenesh1_pg.C_scaffold_1002568	AT1G28960	-	-	Bra010854	c0001_02221
fgenesh1_pg.C_scaffold_1002569	AT1G29000	-	Bra030113	-	c0001_02222
fgenesh2_kg.1__3059__AT1G29010.1	AT1G29010	Bra032924	-	-	c0001_02223
Al_scaffold_0001_2958	AT1G29020	Bra032925	-	-	c0001_02224
fgenesh1_pm.C_scaffold_1002352	AT1G29041	-	Bra030115	-	c0001_02226
fgenesh2_kg.1__3065__AT1G29050.1	AT1G29050	-	Bra030116	-	c0001_02227
scaffold_103220.1	AT1G29060	-	Bra030117	Bra010853	c0164_00003
fgenesh2_kg.1__3067__AT1G29070.1	AT1G29070	-	-	Bra010852	c0164_00002
fgenesh2_kg.1__3068__AT1G29080.1	AT1G29080	-	Bra030118	-	c0001_02229
Al_scaffold_0001_2967	AT1G29100	-	Bra030119	-	c0001_02232
fgenesh2_kg.1__3072__AT1G29120.2	AT1G29120	-	Bra030121	Bra010851	c0001_02233
fgenesh1_pg.C_scaffold_1002584	AT1G29150	Bra032291	-	Bra010849	c0001_02235
scaffold_103229.1	AT1G29160	Bra032292	Bra030124	Bra010848	c0001_02236
scaffold_103230.1	AT1G29170	-	-	Bra010847	c0001_02237
scaffold_103233.1	AT1G29195	-	Bra030125	Bra010845	c0001_02238
fgenesh2_kg.1__3091__AT1G29200.2	AT1G29200	Bra032298	Bra030130	-	c0001_02244
fgenesh2_kg.1__3088__AT1G29220.1	AT1G29220	Bra032297	-	-	c0001_02243
scaffold_103237.1	AT1G29240	-	Bra030129	Bra010842	c0001_02241
fgenesh2_kg.1__3085__AT1G29250.1	AT1G29250	Bra032296	Bra030127	Bra010843	c0001_02240
fgenesh2_kg.1__3084__AT1G29260.1	AT1G29260	Bra032295	-	Bra010844	c0001_02239
Al_scaffold_0001_2985	AT1G29270	-	Bra030132	-	c0001_02246
fgenesh1_pg.C_scaffold_1002596	AT1G29280	Bra032300	-	Bra010839	c0001_02247
fgenesh2_kg.1__3093__AT1G29290.1	AT1G29290	Bra032301	Bra030133	Bra010838	c0001_02248
fgenesh2_kg.1__3094__AT1G29300.1	AT1G29300	Bra032302	-	Bra010837	c0001_02250
fgenesh2_kg.1__3095__AT1G29310.1	AT1G29310	Bra032303	-	-	c0001_02251
scaffold_103249.1	AT1G29320	Bra032305	-	Bra010836	c0001_02252
fgenesh2_kg.1__3098__AT1G29340.1	AT1G29340	Bra032309	-	Bra010834	c0001_02253
fgenesh2_kg.1__3100__AT1G29370.1	AT1G29370	Bra032310	Bra030134	Bra010832	c0001_02254
Al_scaffold_0001_2996	AT1G29380	Bra032314	-	Bra010831	c0001_02255
Al_scaffold_0001_2997	AT1G29390	Bra032315	-	-	c0001_02256
Al_scaffold_0001_2998	AT1G29400	Bra032316	Bra030135	-	c0001_02257
scaffold_103259.1	AT1G29420	Bra032317	-	-	c0001_02259
fgenesh2_kg.1__3113__AT1G29470.1	AT1G29470	Bra032319	Bra030140	Bra010830	c0001_02263
scaffold_103271.1	AT1G29480	Bra032318	Bra030138	-	c0001_02262
scaffold_103272.1	AT1G29490	Bra032322	-	Bra010826	c0001_02264
fgenesh2_kg.1__3114__AT1G29520.1	AT1G29520	Bra032323	Bra030142	Bra010825	c0001_02269
fgenesh2_kg.1__3115__AT1G29530.1	AT1G29530	Bra032324	Bra030143	Bra010824	c0001_02270
Al_scaffold_0001_3014	AT1G29540	-	Bra030144	-	c0001_02271
fgenesh1_pm.C_scaffold_1002392	AT1G29590	Bra032325	-	-	c0001_02272
fgenesh1_pm.C_scaffold_1002393	AT1G29600	Bra032328	-	-	c0001_02273
scaffold_103284.1	AT1G29640	Bra032329	Bra030154	Bra010823	c0001_02275
fgenesh2_kg.1__3123__AT1G29660.1	AT1G29660	-	Bra030156	Bra010820	c0001_02276
scaffold_103287.1	AT1G29680	Bra032330	-	-	c0001_02278
fgenesh2_kg.1__3126__AT1G29690.1	AT1G29690	-	Bra030157	Bra010819	c0001_02279
fgenesh2_kg.1__3127__AT1G29700.1	AT1G29700	-	-	Bra010818	c0001_02280
Al_scaffold_0001_3031	AT1G29724	-	Bra030174	-	c0001_02281
scaffold_103297.1	AT1G29760	Bra032334	-	Bra010814	c0001_02286
fgenesh2_kg.1__3134__AT1G29770.1	AT1G29770	Bra032335	Bra030172	Bra010812	c0001_02287
fgenesh2_kg.1__3138__AT1G29790.1	AT1G29790	Bra032336	-	Bra010810	c0001_02290
fgenesh2_kg.1__3140__AT1G29800.1	AT1G29800	Bra032337	-	-	c0001_02291
Al_scaffold_0001_3041	AT1G29810	Bra032338	-	Bra010809	c0001_02292
fgenesh2_kg.1__3143__AT1G29820.2	AT1G29820	-	-	Bra010808	c0001_02294
fgenesh1_pm.C_scaffold_1002413	AT1G29860	Bra032340	Bra030178	-	c0001_02295
fgenesh2_kg.1__3154__AT1G29900.1	AT1G29900	Bra032344	-	-	c0001_02298
fgenesh2_kg.1__3157__AT1G29910.1	AT1G29910	Bra032345	Bra030182	Bra010807	c1000_00001
fgenesh1_pm.C_scaffold_1002419	AT1G29940	-	Bra030180	-	c0001_02299
fgenesh2_kg.1__3161__AT1G29950.1	AT1G29950	-	Bra030184	Bra010806	c0001_02300
fgenesh1_pg.C_scaffold_1002660	AT1G29962	Bra032347	-	-	c0001_02302
fgenesh2_kg.1__3168__AT1G29970.2	AT1G29965	-	-	Bra010805	c0001_02303
Al_scaffold_0001_3062	AT1G29980	Bra032349	-	-	c0001_02304
scaffold_103330.1	AT1G29990	Bra032350	Bra030185	-	c0001_02305
scaffold_103331.1	AT1G30000	Bra032351	-	Bra010804	c0001_02306
fgenesh2_kg.1__3175__AT1G30020.1	AT1G30020	-	-	Bra010803	c0001_02308
fgenesh2_kg.1__3177__AT1G30040.1	AT1G30040	Bra032354	Bra030187	Bra010802	c0001_02309
fgenesh2_kg.1__3178__AT1G30050.1	AT1G30050	Bra032355	-	Bra010801	c0001_02310
scaffold_103337.1	AT1G30070	Bra032356	-	-	c0001_02311
Al_scaffold_0001_3073	AT1G30080	Bra032357	-	Bra010800	c0001_02312
fgenesh2_kg.1__3181__AT1G30090.1	AT1G30090	Bra032358	-	-	c0001_02313
fgenesh2_kg.1__3182__AT1G30100.1	AT1G30100	Bra032359	-	-	c0001_02314
fgenesh2_kg.1__3183__AT1G30110.1	AT1G30110	Bra032360	Bra030188	Bra010797	c0001_02315
fgenesh2_kg.1__3184__AT1G30120.1	AT1G30120	Bra032361	-	Bra010796	c0001_02316
fgenesh2_kg.1__3186__AT1G30130.1	AT1G30130	-	-	Bra010795	c0001_02318
Al_scaffold_0001_3081	AT1G30135	Bra032362	-	Bra010794	c0001_02319
scaffold_103352.1	AT1G30190	Bra032363	Bra030189	-	c0001_02320
fgenesh2_kg.1__3192__AT1G30200.2	AT1G30200	Bra032364	-	-	c0001_02321
fgenesh2_kg.1__3195__AT1G30210.2	AT1G30210	Bra032365	-	Bra010789	c0001_02322
fgenesh2_kg.1__3197__AT1G30220.1	AT1G30220	-	-	Bra010788	c0001_02323
fgenesh2_kg.1__3198__AT1G30230.2	AT1G30230	Bra032367	-	Bra010787	c0001_02324
fgenesh2_kg.1__3201__AT1G30240.1	AT1G30240	Bra032368	-	Bra010786	c0001_02326
scaffold_103360.1	AT1G30250	Bra032370	-	Bra010785	c0001_02327
scaffold_103361.1	AT1G30260	Bra032371	Bra014874	-	c0001_02328
fgenesh2_kg.1__3205__AT1G30280.1	AT1G30280	Bra032375	Bra014876	Bra010780	c0001_02330
fgenesh1_pg.C_scaffold_1002690	AT1G30290	Bra032378	Bra030139	-	c0001_02331
fgenesh2_kg.1__3208__AT1G30300.1	AT1G30300	Bra032379	-	Bra010779	c0001_02333
fgenesh2_kg.1__3209__AT1G30320.1	AT1G30320	Bra032380	-	Bra010777	c0001_02335
fgenesh2_kg.1__3210__AT1G30330.2	AT1G30330	-	-	Bra010776	c0001_02336
fgenesh2_kg.1__3213__AT1G30360.1	AT1G30360	Bra032382	-	Bra010775	c0001_02337
scaffold_103371.1	AT1G30370	Bra032383	Bra014877	-	c0001_02338
scaffold_103374.1	AT1G30380	Bra032384	-	Bra010774	c0001_02339
fgenesh2_kg.1__3217__AT1G30400.2	AT1G30400	Bra032386	Bra014879	Bra010773	c0001_02340
fgenesh2_kg.1__3221__AT1G30440.1	AT1G30440	Bra032391	-	Bra010771	c0001_02356
fgenesh2_kg.1__3223__AT1G30450.1	AT1G30450	-	Bra014880	Bra010770	c0001_02343
scaffold_103382.1	AT1G30460	-	Bra014881	Bra010769	c0001_02344
fgenesh2_kg.1__3226__AT1G30470.1	AT1G30470	Bra032392	Bra014882	Bra010766	c0001_02345
fgenesh2_kg.1__3228__AT1G30475.1	AT1G30475	-	Bra014883	Bra010765	c0001_02346
fgenesh2_kg.1__3230__AT1G30480.1	AT1G30480	Bra032393	-	Bra010764	c0001_02347
fgenesh2_kg.1__3231__AT1G30490.1	AT1G30490	Bra032394	-	-	c0001_02348
fgenesh2_kg.1__3232__AT1G30500.2	AT1G30500	Bra032395	-	-	c0001_02349
scaffold_103394.1	AT1G30510	Bra032396	-	-	c0001_02350
fgenesh1_pm.C_scaffold_1002472	AT1G30520	Bra032398	-	-	c0001_02351
scaffold_103402.1	AT1G30560	-	-	Bra039863	c0001_02358
fgenesh2_kg.1__3240__AT1G30570.1	AT1G30570	Bra032404	-	-	c0001_02360
scaffold_103404.1	AT1G30580	Bra032405	-	Bra039865	c0001_02361
fgenesh2_kg.1__3243__AT1G30600.1	AT1G30600	Bra032407	-	-	c0001_02362
scaffold_103408.1	AT1G30610	Bra032408	-	-	c0001_02363
scaffold_103410.1	AT1G30620	Bra032409	-	-	c0001_02364
fgenesh2_kg.1__3248__AT1G30630.1	AT1G30630	Bra032410	-	-	c0001_02365
fgenesh1_pm.C_scaffold_1002482	AT1G30640	Bra032411	-	Bra010763	c0001_02366
Al_scaffold_0001_3147	AT1G30660	Bra023117	-	-	c0001_02370
Al_scaffold_0001_3150	AT1G30690	Bra023118	-	-	c0001_02371
scaffold_103419.1	AT1G30700	Bra023127	Bra014886	-	c0001_02372
fgenesh2_kg.1__3260__AT1G30755.1	AT1G30755	Bra023130	-	-	c0001_02377
fgenesh2_kg.1__3261__AT1G30760.1	AT1G30760	Bra023131	Bra014890	-	c0001_02378
fgenesh2_kg.1__3262__AT1G30780.1	AT1G30780	Bra023135	Bra014878	-	c0001_02380
fgenesh2_kg.1__3265__AT1G30800.1	AT1G30800	-	-	Bra039868	c0001_02381
fgenesh1_pg.C_scaffold_1002753	AT1G30810	Bra023136	-	Bra039869	c0001_02382
fgenesh2_kg.1__3277__AT1G30825.1	AT1G30825	Bra023140	Bra014893	-	c0001_02384
fgenesh2_kg.1__3279__AT1G30840.1	AT1G30840	Bra023141	-	-	c0001_02385
scaffold_103451.1	AT1G30850	Bra023146	Bra014894	Bra039870	c0001_02386
fgenesh2_kg.1__3282__AT1G30860.1	AT1G30860	Bra023148	-	Bra039871	c0001_02387
fgenesh2_kg.1__3283__AT1G30870.1	AT1G30870	Bra023149	Bra014895	Bra039872	c0001_02388
fgenesh2_kg.1__3284__AT1G30880.1	AT1G30880	Bra023150	Bra014896	Bra039873	c0001_02389
fgenesh2_kg.1__3285__AT1G30890.1	AT1G30890	-	-	Bra039874	c0001_02390
fgenesh1_pm.C_scaffold_1002513	AT1G30900	Bra023151	-	Bra039877	c0001_02391
scaffold_103474.1	AT1G30950	-	-	Bra039878	c0001_02392
scaffold_103475.1	AT1G30960	Bra023152	Bra014897	Bra039879	c0001_02393
fgenesh2_kg.1__3297__AT1G30970.1	AT1G30970	Bra023153	-	Bra039880	c0001_02394
fgenesh2_kg.1__3298__AT1G31010.1	AT1G31010	Bra023154	-	-	c0001_02397
fgenesh1_pm.C_scaffold_1002523	AT1G31040	Bra023155	Bra014899	Bra038403	c0001_02399
fgenesh2_kg.1__3303__AT1G31070.2	AT1G31070	Bra023160	-	Bra038405	c0001_02401
fgenesh1_pg.C_scaffold_1002808	AT1G31120	-	Bra014902	Bra038410	c0001_02405
fgenesh1_pg.C_scaffold_1003106	AT1G31160	-	Bra014904	-	c0001_02408
fgenesh2_kg.1__3569__AT1G31170.1	AT1G31170	-	-	Bra038412	c0001_02409
fgenesh1_pm.C_scaffold_1002748	AT1G31175	Bra023164	-	-	c0458_00007
scaffold_103875.1	AT1G31190	Bra023165	-	-	c0458_00006
fgenesh1_pg.C_scaffold_1003098	AT1G31200	Bra023166	-	-	c0001_02411
fgenesh2_kg.1__3566__AT1G31220.1	AT1G31220	Bra023168	-	-	c0001_02412
fgenesh2_kg.1__3565__AT1G31230.1	AT1G31230	Bra023169	-	-	c0001_02413
scaffold_103870.1	AT1G31240	Bra023170	-	-	c0001_02414
fgenesh1_pm.C_scaffold_1002740	AT1G31260	Bra023171	-	Bra038416	c0001_02415
Al_scaffold_0001_3610	AT1G31280	Bra023172	-	-	c0001_02419
fgenesh2_kg.1__3598__AT1G31300.2	AT1G31300	Bra023174	Bra014905	-	c0001_02421
fgenesh1_pm.C_scaffold_1002774	AT1G31310	Bra023175	Bra014906	-	c0001_02422
fgenesh1_pm.C_scaffold_1002773	AT1G31320	-	Bra014907	-	c0001_02424
fgenesh2_kg.1__3593__AT1G31335.1	AT1G31335	Bra023177	Bra014909	-	c0001_02426
scaffold_103921.1	AT1G31350	Bra023181	-	Bra038419	c0001_02428
scaffold_103920.1	AT1G31360	-	-	Bra038422	c0001_02429
fgenesh2_kg.1__3589__AT1G31410.1	AT1G31410	-	Bra014910	-	c0001_02430
scaffold_103916.1	AT1G31420	Bra035523	-	-	c0001_02431
scaffold_103912.1	AT1G31460	Bra023188	-	-	c0001_02433
fgenesh2_kg.1__3583__AT1G31470.1	AT1G31470	Bra023189	-	-	c0001_02434
fgenesh2_kg.1__3582__AT1G31480.1	AT1G31480	Bra023190	-	Bra038425	c0001_02435
scaffold_103909.1	AT1G31490	Bra023191	-	-	c0001_02436
Al_scaffold_0001_3568	AT1G31650	Bra023198	-	Bra038429	c0001_02439
fgenesh1_pm.C_scaffold_1002530	AT1G31670	-	Bra014912	Bra038430	c0001_02442
fgenesh2_kg.1__3311__AT1G31720.1	AT1G31720	-	-	Bra038434	c0001_02443
scaffold_103518.1	AT1G31730	Bra023199	-	-	c0001_02446
fgenesh2_kg.1__3316__AT1G31760.1	AT1G31760	Bra023201	Bra033879	-	c0001_02449
fgenesh2_kg.1__3317__AT1G31770.1	AT1G31770	Bra023202	Bra033878	-	c0001_02450
scaffold_103525.1	AT1G31780	Bra023203	-	-	c0001_02451
scaffold_103526.1	AT1G31790	-	Bra033876	-	c0001_02452
fgenesh2_kg.1__3320__AT1G31800.1	AT1G31800	-	-	Bra038413	c0001_02453
fgenesh2_kg.1__3323__AT1G31812.1	AT1G31812	Bra023206	Bra033875	Bra038439	c0001_02454
fgenesh2_kg.1__3326__AT1G31850.1	AT1G31850	Bra023213	Bra033872	-	c0001_02457
scaffold_103537.1	AT1G31860	Bra023217	Bra033871	-	c0001_02459
Al_scaffold_0001_3247	AT1G31870	-	Bra033870	-	c0001_02460
Al_scaffold_0001_3249	AT1G31885	-	Bra033867	Bra035520	c0001_02463
fgenesh2_kg.1__3333__AT1G31910.1	AT1G31910	-	-	Bra035519	c0001_02464
fgenesh2_kg.1__3334__AT1G31920.1	AT1G31920	-	Bra033866	-	c0001_02465
fgenesh2_kg.1__3336__AT1G31930.1	AT1G31930	Bra023220	Bra033865	-	c0001_02466
fgenesh2_kg.1__3338__AT1G31940.1	AT1G31940	Bra023226	Bra033863	-	c0001_02467
Al_scaffold_0001_3256	AT1G31970	Bra023227	-	Bra035518	c0001_02468
fgenesh2_kg.1__3341__AT1G32050.1	AT1G32050	-	Bra033862	Bra035517	c0001_02470
scaffold_103559.1	AT1G32060	Bra023235	Bra033861	Bra035516	c0001_02471
fgenesh2_kg.1__3344__AT1G32070.2	AT1G32070	-	Bra033860	-	c0001_02472
fgenesh2_kg.1__3345__AT1G32080.1	AT1G32080	Bra023236	Bra033859	-	c0001_02474
fgenesh2_kg.1__3346__AT1G32090.1	AT1G32090	-	Bra033858	-	c0001_02475
fgenesh2_kg.1__3347__AT1G32100.1	AT1G32100	Bra023237	Bra033856	-	c0001_02476
fgenesh1_pg.C_scaffold_1002854	AT1G32120	Bra023240	Bra033853	-	c0001_02477
fgenesh2_kg.1__3349__AT1G32130.1	AT1G32130	Bra023242	-	-	c0001_02479
fgenesh2_kg.1__3350__AT1G32150.1	AT1G32150	Bra023243	-	-	c0001_02480
fgenesh2_kg.1__3351__AT1G32160.1	AT1G32160	-	Bra033851	-	c0001_02481
fgenesh2_kg.1__3352__AT1G32170.1	AT1G32170	-	-	Bra035513	c0001_02482
fgenesh2_kg.1__3353__AT1G32180.1	AT1G32180	-	Bra033849	-	c0001_02484
fgenesh2_kg.1__3355__AT1G32190.1	AT1G32190	Bra023247	Bra033847	-	c0001_02485
fgenesh2_kg.1__3362__AT1G32200.1	AT1G32200	Bra023248	Bra033846	Bra035512	c0001_02487
scaffold_103581.1	AT1G32210	Bra023249	Bra033845	-	c0001_02488
fgenesh2_kg.1__3365__AT1G32220.1	AT1G32220	Bra023250	-	-	c0001_02489
fgenesh2_kg.1__3367__AT1G32230.1	AT1G32230	Bra023252	-	Bra035511	c0001_02490
fgenesh2_kg.1__3368__AT1G32240.1	AT1G32240	Bra023254	Bra033844	-	c0001_02491
scaffold_103587.1	AT1G32250	Bra040770	-	-	c0001_02492
fgenesh2_kg.1__3370__AT1G32260.1	AT1G32260	Bra023255	-	-	c0001_02493
Al_scaffold_0001_3289	AT1G32270	Bra023256	-	-	c0001_02494
scaffold_103594.1	AT1G32320	Bra023257	-	-	c0001_02554
fgenesh2_kg.1__3374__AT1G32330.1	AT1G32330	Bra023258	-	Bra035507	c0001_02553
Al_scaffold_0001_3299	AT1G32340	-	Bra010152	-	c0001_02552
fgenesh1_pm.C_scaffold_1002587	AT1G32350	-	Bra010153	-	c0001_02551
scaffold_103602.1	AT1G32360	Bra023260	Bra010155	-	c0001_02549
fgenesh2_kg.1__3379__AT1G32361.1	AT1G32361	Bra023261	-	Bra035483	c0001_02548
fgenesh2_kg.1__3380__AT1G32380.1	AT1G32380	Bra023263	Bra010159	-	c0001_02547
fgenesh2_kg.1__3382__AT1G32400.1	AT1G32400	Bra023264	Bra010162	-	c0001_02546
Al_scaffold_0001_3306	AT1G32415	Bra023266	-	-	c0001_02545
fgenesh2_kg.1__3390__AT1G32440.1	AT1G32440	-	Bra010164	-	c0001_02544
fgenesh1_pm.C_scaffold_1002596	AT1G32450	Bra023267	Bra033884	-	c0001_02543
fgenesh2_kg.1__3392__AT1G32460.1	AT1G32460	Bra023269	Bra010166	Bra035485	c0001_02542
scaffold_103618.1	AT1G32470	Bra023270	Bra010167	Bra035486	c0001_02541
Al_scaffold_0001_3322	AT1G32530	Bra023274	-	-	c0001_02537
fgenesh2_kg.1__3399__AT1G32540.3	AT1G32540	-	Bra010171	-	c0001_02536
scaffold_103626.1	AT1G32550	Bra023277	-	Bra035490	c0001_02535
Al_scaffold_0001_3325	AT1G32560	Bra023278	-	Bra035491	c0001_02534
fgenesh2_kg.1__3403__AT1G32583.1	AT1G32583	-	Bra010173	-	c0001_02533
scaffold_103630.1	AT1G32585	-	-	Bra035492	c0001_02532
fgenesh2_kg.1__3407__AT1G32630.1	AT1G32630	-	Bra010177	-	c0001_02530
scaffold_103634.1	AT1G32640	-	Bra010178	-	c0001_02528
scaffold_103636.1	AT1G32690	-	Bra010181	-	c0001_02527
Al_scaffold_0001_3341	AT1G32700	Bra023280	-	Bra035494	c0001_02526
Al_scaffold_0001_3343	AT1G32710	-	-	Bra035497	c0001_02525
fgenesh2_kg.1__3412__AT1G32730.1	AT1G32730	-	Bra010182	-	c0001_02524
fgenesh1_pg.C_scaffold_1002924	AT1G32740	Bra023282	-	-	c0001_02523
fgenesh1_pm.C_scaffold_1002616	AT1G32750	-	-	Bra035499	c0001_02521
fgenesh2_kg.1__3415__AT1G32760.1	AT1G32760	Bra023284	-	-	c0001_02520
fgenesh1_pm.C_scaffold_1002619	AT1G32770	Bra023288	Bra010183	-	c0001_02519
fgenesh2_kg.1__3418__AT1G32780.1	AT1G32780	Bra023290	Bra010185	-	c0001_02518
fgenesh2_kg.1__3419__AT1G32790.2	AT1G32790	Bra023291	-	-	c0001_02517
fgenesh2_kg.1__3422__AT1G32850.1	AT1G32850	Bra023292	Bra010187	-	c0001_02515
scaffold_103660.1	AT1G32860	Bra023293	-	-	c0001_02514
fgenesh2_kg.1__3428__AT1G32928.1	AT1G32928	Bra023295	Bra010191	-	c0001_02506
fgenesh2_kg.1__3429__AT1G32930.1	AT1G32930	Bra023296	-	-	c0001_02505
fgenesh2_kg.1__3430__AT1G32940.1	AT1G32940	Bra023300	-	-	c0001_02500
fgenesh2_kg.1__3435__AT1G32990.1	AT1G32990	Bra023302	-	-	c0001_02499
fgenesh1_pm.C_scaffold_1002635	AT1G33030	-	-	Bra035481	c0333_00001
fgenesh1_pm.C_scaffold_1002639	AT1G33060	-	Bra010193	Bra035488	c0001_02556
fgenesh2_kg.1__3440__AT1G33080.1	AT1G33080	Bra040004	-	Bra035477	c0001_02557
fgenesh2_kg.1__3447__AT1G33170.1	AT1G33170	-	-	Bra035476	c0001_02562
fgenesh2_kg.1__3450__AT1G33230.1	AT1G33230	Bra040009	-	Bra036730	c0001_02563
fgenesh2_kg.1__3451__AT1G33240.1	AT1G33240	Bra040010	-	Bra036731	c0001_02564
scaffold_103701.1	AT1G33250	Bra040011	-	-	c0001_02565
fgenesh1_pm.C_scaffold_1002651	AT1G33260	Bra040013	-	-	c0001_02566
fgenesh2_kg.1__3456__AT1G33270.1	AT1G33270	-	-	Bra036734	c0001_02568
fgenesh2_kg.1__3460__AT1G33290.1	AT1G33290	Bra027989	-	-	c0001_02569
fgenesh1_pg.C_scaffold_1002976	AT1G33350	Bra027998	-	-	c0001_02572
fgenesh2_kg.1__3462__AT1G33360.1	AT1G33360	Bra027997	-	-	c0001_02571
fgenesh2_kg.1__3468__AT1G33410.1	AT1G33410	-	Bra010196	-	c0001_02578
fgenesh1_pm.C_scaffold_1002664	AT1G33430	-	Bra010198	-	c0001_02580
scaffold_103719.1	AT1G33440	Bra028002	-	-	c0001_02581
fgenesh2_kg.1__3472__AT1G33470.1	AT1G33470	-	Bra010203	-	c0001_02582
fgenesh2_kg.1__3477__AT1G33500.1	AT1G33500	-	Bra010206	-	c0001_02588
scaffold_103725.1	AT1G33520	-	Bra010207	-	c0001_02589
Al_scaffold_0001_3426	AT1G33530	-	Bra010205	-	c0001_02584
scaffold_103732.1	AT1G33590	Bra028006	Bra010209	-	c0001_02593
fgenesh2_kg.1__3483__AT1G33700.2	AT1G33700	Bra028008	-	-	c0001_02595
scaffold_103754.1	AT1G33760	Bra028009	Bra010210	-	c0001_02596
fgenesh2_kg.1__3486__AT1G33780.1	AT1G33780	Bra028012	-	-	c0001_02599
Al_scaffold_0001_3451	AT1G33800	Bra028013	Bra034460	-	c0001_02600
fgenesh1_pg.C_scaffold_1003013	AT1G33810	Bra028015	-	-	c0001_02601
fgenesh2_kg.1__3491__AT1G33811.1	AT1G33811	-	Bra034459	-	c0001_02604
fgenesh2_kg.1__3507__AT1G33980.1	AT1G33980	Bra028017	Bra034457	Bra036737	c0001_02610
scaffold_103781.1	AT1G33990	Bra028024	Bra034455	Bra036738	c0001_02611
scaffold_103782.1	AT1G34000	Bra028025	-	Bra036739	c0001_02612
fgenesh1_pm.C_scaffold_1002697	AT1G34010	Bra028026	Bra034450	-	c0001_02613
fgenesh2_kg.1__3510__AT1G34020.1	AT1G34020	Bra028027	Bra034448	-	c0001_02614
fgenesh2_kg.1__3511__AT1G34030.1	AT1G34030	Bra028028	Bra034447	-	c0001_02615
fgenesh2_kg.1__3515__AT1G34060.1	AT1G34060	Bra028030	-	-	c0128_00013
fgenesh1_pm.C_scaffold_1002702	AT1G34065	Bra028031	-	-	c0128_00012
fgenesh2_kg.1__3517__AT1G34110.1	AT1G34110	-	Bra034446	Bra036747	c0128_00010
fgenesh2_kg.1__3518__AT1G34120.2	AT1G34120	-	Bra034444	-	c0128_00009
[truncated: 13,328 more rows]
